# Supplementary material for: Genome Wide Association Study on Development and Evolution of Glutinous Rice
Source: Research Square preprint supplement (doi:10.21203/rs.3.rs-649622/v1), 2021-07-06
Supplement: Supplementary file 1 [file 3496875bbb51d6869313abab.xlsx]

## Sheet: Full population
Supplementary Table S2: Summary of SNPs associated significantly with glutinous detected in full population by GWAS mapping
SNP	Chromosome	Position	-LOG10(P)	Gene with signal in ORF	Gene with signal in promoter
Chr1_41852969	1	41852969	6.16853		LOC_Os01g72170
Chr4_31372559	4	31372559	5.6871
Chr4_31233676	4	31233676	9.75344
Chr4_31233641	4	31233641	5.7508
Chr4_31212801	4	31212801	6.66502	LOC_Os04g52479
Chr1_28408214	1	28408214	7.003		LOC_Os01g49400
Chr1_28407925	1	28407925	6.01696		LOC_Os01g49400
Chr1_28407871	1	28407871	6.3129		LOC_Os01g49400
Chr1_28405613	1	28405613	6.3266
Chr1_28402314	1	28402314	5.72007		LOC_Os01g49390
Chr1_28402271	1	28402271	6.13479		LOC_Os01g49390
Chr1_28399075	1	28399075	7.1128
Chr1_28398471	1	28398471	6.13121
Chr1_28395984	1	28395984	5.75774
Chr1_28395594	1	28395594	5.73994
Chr1_28394878	1	28394878	6.08058
Chr1_28394661	1	28394661	5.96441
Chr2_28206910	2	28206910	5.64468
Chr4_28190295	4	28190295	5.70283
Chr4_28178353	4	28178353	6.68612		LOC_Os04g47490
Chr4_28158612	4	28158612	5.71763
Chr4_28158548	4	28158548	5.77119
Chr4_28158547	4	28158547	5.75637
Chr4_28158527	4	28158527	5.60746
Chr4_28158417	4	28158417	5.71313
Chr4_28158082	4	28158082	6.18368
Chr4_28157634	4	28157634	6.02794
Chr4_28155912	4	28155912	6.20614		LOC_Os04g47450
Chr4_28155557	4	28155557	5.8585		LOC_Os04g47450
Chr4_28155131	4	28155131	5.75767		LOC_Os04g47450
Chr4_28155118	4	28155118	6.69722		LOC_Os04g47450
Chr4_28154966	4	28154966	5.93435		LOC_Os04g47450
Chr4_28154269	4	28154269	5.80652		LOC_Os04g47450
Chr4_28153962	4	28153962	5.95388
Chr4_28153428	4	28153428	5.82865
Chr4_28152591	4	28152591	6.17889
Chr4_28151147	4	28151147	5.83057
Chr4_28150951	4	28150951	5.84476
Chr4_28149863	4	28149863	5.65934
Chr4_28149833	4	28149833	6.23262
Chr4_28149824	4	28149824	6.11992
Chr4_28149817	4	28149817	5.86819
Chr4_28148845	4	28148845	5.6322
Chr4_28148145	4	28148145	5.81596
Chr4_28146792	4	28146792	5.81656
Chr4_28140980	4	28140980	5.76778		LOC_Os04g47420
Chr4_28140544	4	28140544	5.74039		LOC_Os04g47420
Chr4_28140514	4	28140514	5.66833		LOC_Os04g47420
Chr4_28140468	4	28140468	5.65805		LOC_Os04g47420
Chr4_28140308	4	28140308	5.87034		LOC_Os04g47420
Chr4_28139376	4	28139376	5.66803	LOC_Os04g47420
Chr4_28137491	4	28137491	5.65424
Chr4_28137475	4	28137475	5.88366
Chr4_28137414	4	28137414	6.07925
Chr4_28137374	4	28137374	6.14944
Chr4_28137339	4	28137339	5.87571
Chr4_28137325	4	28137325	5.97487
Chr4_28137157	4	28137157	5.65999
Chr4_28137059	4	28137059	5.61314
Chr4_28135762	4	28135762	6.522	LOC_Os04g47410
Chr4_28132238	4	28132238	5.62751	LOC_Os04g47410	LOC_Os04g47400
Chr4_28132177	4	28132177	5.77379	LOC_Os04g47410	LOC_Os04g47400
Chr4_28132172	4	28132172	5.75916	LOC_Os04g47410	LOC_Os04g47400
Chr4_28131172	4	28131172	5.6727	LOC_Os04g47410	LOC_Os04g47400
Chr4_28131158	4	28131158	6.05608	LOC_Os04g47410	LOC_Os04g47400
Chr4_28129498	4	28129498	5.82866	LOC_Os04g47400	LOC_Os04g47410
Chr4_28129434	4	28129434	5.80503	LOC_Os04g47400	LOC_Os04g47410
Chr4_28129423	4	28129423	5.99206	LOC_Os04g47400	LOC_Os04g47410
Chr4_28129390	4	28129390	5.82979	LOC_Os04g47400	LOC_Os04g47410
Chr4_28129385	4	28129385	5.69167	LOC_Os04g47400	LOC_Os04g47410
Chr4_28129196	4	28129196	5.91697	LOC_Os04g47400	LOC_Os04g47410
Chr4_28128550	4	28128550	5.8297	LOC_Os04g47400
Chr4_28128433	4	28128433	5.78341	LOC_Os04g47400
Chr4_28128321	4	28128321	6.21303	LOC_Os04g47400
Chr4_28128320	4	28128320	6.0488	LOC_Os04g47400
Chr4_28128319	4	28128319	6.28543	LOC_Os04g47400
Chr4_28126959	4	28126959	5.83601	LOC_Os04g47400	LOC_Os04g47390
Chr4_28126428	4	28126428	5.83081		LOC_Os04g47390
Chr4_28126294	4	28126294	5.69428		LOC_Os04g47390
Chr4_28125629	4	28125629	6.16868		LOC_Os04g47390
Chr4_28125441	4	28125441	5.96775		LOC_Os04g47390
Chr4_28125419	4	28125419	6.36748		LOC_Os04g47390
Chr4_28124282	4	28124282	6.00506	LOC_Os04g47390	LOC_Os04g47380
Chr4_28124004	4	28124004	6.02899	LOC_Os04g47390	LOC_Os04g47380
Chr4_28123522	4	28123522	5.75232		LOC_Os04g47380
Chr4_28123459	4	28123459	5.66976		LOC_Os04g47380
Chr4_28123094	4	28123094	5.68979		LOC_Os04g47380
Chr4_28122888	4	28122888	6.29919		LOC_Os04g47380
Chr4_28122766	4	28122766	7.14541		LOC_Os04g47380
Chr4_28122407	4	28122407	5.82088	LOC_Os04g47380
Chr4_28121206	4	28121206	5.9154	LOC_Os04g47380
Chr4_28121192	4	28121192	6.03958	LOC_Os04g47380
Chr4_28120998	4	28120998	6.39357	LOC_Os04g47380
Chr4_28120766	4	28120766	6.34657	LOC_Os04g47380
Chr4_28120594	4	28120594	6.06675	LOC_Os04g47380
Chr4_28118861	4	28118861	6.00205	LOC_Os04g47380
Chr4_28118300	4	28118300	6.08249	LOC_Os04g47380
Chr4_28117801	4	28117801	5.63028
Chr4_28116438	4	28116438	5.97548	LOC_Os04g47370
Chr4_28116360	4	28116360	6.0732	LOC_Os04g47370
Chr4_28114285	4	28114285	6.04882		LOC_Os04g47370
Chr4_28114071	4	28114071	5.92998		LOC_Os04g47370
Chr4_28113771	4	28113771	5.67012		LOC_Os04g47370
Chr4_28113521	4	28113521	5.69439	LOC_Os04g47360	LOC_Os04g47370
Chr4_28113410	4	28113410	6.0463	LOC_Os04g47360	LOC_Os04g47370
Chr4_28113355	4	28113355	6.76172	LOC_Os04g47360	LOC_Os04g47370
Chr4_28113350	4	28113350	6.05289	LOC_Os04g47360	LOC_Os04g47370
Chr4_28113296	4	28113296	5.87727	LOC_Os04g47360	LOC_Os04g47370
Chr4_28112443	4	28112443	5.6377	LOC_Os04g47360
Chr4_28110036	4	28110036	6.0771	LOC_Os04g47360
Chr4_28109420	4	28109420	5.92788	LOC_Os04g47360	LOC_Os04g47350
Chr4_28106204	4	28106204	5.74471	LOC_Os04g47350
Chr4_28106050	4	28106050	6.23125	LOC_Os04g47350
Chr4_28102486	4	28102486	5.73901
Chr4_28102105	4	28102105	5.60012
Chr4_28101287	4	28101287	5.87425
Chr4_28101284	4	28101284	5.60507
Chr4_28098691	4	28098691	6.17614		LOC_Os04g47330
Chr4_28096978	4	28096978	5.83994	LOC_Os04g47330
Chr4_28094928	4	28094928	5.68213	LOC_Os04g47320
Chr4_28090205	4	28090205	5.75032		LOC_Os04g47320
Chr4_28090108	4	28090108	5.77088		LOC_Os04g47320
Chr4_28089987	4	28089987	5.93914		LOC_Os04g47320
Chr4_28086887	4	28086887	5.65068
Chr4_28086885	4	28086885	5.81564
Chr4_28086169	4	28086169	5.68838
Chr4_28085137	4	28085137	5.75241	LOC_Os04g47310
Chr4_28084627	4	28084627	5.66848	LOC_Os04g47310
Chr4_28083490	4	28083490	5.89567		LOC_Os04g47300
Chr4_28082398	4	28082398	5.70661		LOC_Os04g47300
Chr4_28079524	4	28079524	5.68234	LOC_Os04g47290
Chr4_28078201	4	28078201	5.81359	LOC_Os04g47290
Chr4_28074912	4	28074912	6.03768		LOC_Os04g47280
Chr4_28071156	4	28071156	5.65048		LOC_Os04g47270
Chr4_28066786	4	28066786	5.75444	LOC_Os04g47260
Chr4_28064639	4	28064639	5.6712		LOC_Os04g47250
Chr4_28064608	4	28064608	5.60322		LOC_Os04g47250
Chr4_28062663	4	28062663	5.79371	LOC_Os04g47250
Chr4_28059842	4	28059842	6.16984
Chr4_28059539	4	28059539	5.64961
Chr4_28058125	4	28058125	6.25884		LOC_Os04g47240
Chr4_28057565	4	28057565	6.04051		LOC_Os04g47240
Chr4_28049745	4	28049745	5.62033	LOC_Os04g47240
Chr4_28046843	4	28046843	5.92957	LOC_Os04g47220
Chr4_28046474	4	28046474	6.03277		LOC_Os04g47220
Chr4_28046072	4	28046072	6.55331		LOC_Os04g47220
Chr4_28045675	4	28045675	6.30276		LOC_Os04g47220
Chr4_28045651	4	28045651	5.61359		LOC_Os04g47220
Chr4_28045025	4	28045025	5.91516		LOC_Os04g47220
Chr4_28037465	4	28037465	6.23293
Chr4_28037240	4	28037240	5.78564
Chr4_28031587	4	28031587	5.82445		LOC_Os04g47190
Chr4_28029542	4	28029542	6.05516	LOC_Os04g47190
Chr4_28029034	4	28029034	5.95856	LOC_Os04g47190
Chr4_28028067	4	28028067	5.61298	LOC_Os04g47190
Chr4_28027144	4	28027144	6.15849	LOC_Os04g47190
Chr4_28026929	4	28026929	5.72056	LOC_Os04g47190
Chr4_28025729	4	28025729	5.68612
Chr4_28025700	4	28025700	5.71704
Chr4_28008057	4	28008057	6.09062
Chr4_27999079	4	27999079	5.75501	LOC_Os04g47150
Chr4_27994292	4	27994292	5.96376	LOC_Os04g47140	LOC_Os04g47130
Chr4_27994195	4	27994195	5.99208	LOC_Os04g47140	LOC_Os04g47130
Chr4_27994025	4	27994025	6.02603	LOC_Os04g47140	LOC_Os04g47130
Chr4_27993051	4	27993051	6.1633	LOC_Os04g47140	LOC_Os04g47130
Chr4_27992804	4	27992804	5.80694	LOC_Os04g47140	LOC_Os04g47130
Chr4_27990870	4	27990870	5.65703	LOC_Os04g47130
Chr4_27988771	4	27988771	5.7496	LOC_Os04g47120
Chr4_27987440	4	27987440	6.19785	LOC_Os04g47120
Chr4_27987393	4	27987393	6.02847	LOC_Os04g47120
Chr4_27986021	4	27986021	5.74296	LOC_Os04g47120
Chr5_27648802	5	27648802	6.34407	LOC_Os05g48240
Chr11_27643936	11	27643936	5.97592
Chr5_27590853	5	27590853	6.23279
Chr2_26269693	2	26269693	6.11607		LOC_Os02g43540
Chr2_26269679	2	26269679	5.95604		LOC_Os02g43540
Chr2_26268964	2	26268964	7.43099
Chr2_26268694	2	26268694	6.42826
Chr2_26268463	2	26268463	6.56144
Chr2_26267211	2	26267211	6.33717		LOC_Os02g43530
Chr2_26266398	2	26266398	8.80715		LOC_Os02g43530
Chr2_26266049	2	26266049	6.91517		LOC_Os02g43530
Chr2_26266048	2	26266048	6.9042		LOC_Os02g43530
Chr2_26265485	2	26265485	7.9718	LOC_Os02g43519	LOC_Os02g43530
Chr2_26265229	2	26265229	6.62377	LOC_Os02g43519
Chr2_26265157	2	26265157	6.97115	LOC_Os02g43519
Chr2_26265149	2	26265149	6.6908	LOC_Os02g43519
Chr2_26264660	2	26264660	7.41787	LOC_Os02g43519
Chr2_26263564	2	26263564	6.937	LOC_Os02g43519
Chr2_26263116	2	26263116	6.57347	LOC_Os02g43519
Chr2_26253987	2	26253987	6.07392		LOC_Os02g43500
Chr2_26249854	2	26249854	6.00752	LOC_Os02g43500
Chr2_26249853	2	26249853	5.88842	LOC_Os02g43500
Chr2_26215887	2	26215887	6.36379		LOC_Os02g43440
Chr2_26025392	2	26025392	6.4922
Chr2_26025381	2	26025381	6.11368
Chr2_25994764	2	25994764	7.58616
Chr2_25991747	2	25991747	5.66061
Chr2_25692896	2	25692896	5.69411		LOC_Os02g42730
Chr2_25692209	2	25692209	5.89204		LOC_Os02g42720
Chr5_25495181	5	25495181	6.23645
Chr5_25481179	5	25481179	7.41151	LOC_Os05g43830
Chr5_25479276	5	25479276	6.08576	LOC_Os05g43830
Chr5_25479044	5	25479044	5.65003	LOC_Os05g43830
Chr3_25365932	3	25365932	7.06471	LOC_Os03g44930
Chr12_25161578	12	25161578	6.68038
Chr3_24969719	3	24969719	5.61048
Chr8_24745789	8	24745789	7.09043	LOC_Os08g39174
Chr8_24722625	8	24722625	6.68283	LOC_Os08g39140
Chr8_24722623	8	24722623	6.25361	LOC_Os08g39140
Chr8_24722617	8	24722617	5.77124	LOC_Os08g39140
Chr8_24708540	8	24708540	5.9065
Chr12_24556651	12	24556651	5.68431		LOC_Os12g39770
Chr12_24503109	12	24503109	6.32818	LOC_Os12g39680
Chr12_24501291	12	24501291	6.96034
Chr12_24489196	12	24489196	6.02906	LOC_Os12g39660
Chr6_23851627	6	23851627	6.55615		LOC_Os06g40070
Chr6_23845676	6	23845676	5.97638	LOC_Os06g40060
Chr6_23844226	6	23844226	5.7829	LOC_Os06g40060	LOC_Os06g40060
Chr6_23841449	6	23841449	5.86759		LOC_Os06g40060
Chr6_23840705	6	23840705	5.97225
Chr6_23840643	6	23840643	6.58726
Chr6_23839778	6	23839778	5.6595
Chr6_23839004	6	23839004	6.16933
Chr6_23838277	6	23838277	5.7889
Chr6_23837318	6	23837318	6.22955
Chr6_23836853	6	23836853	5.82201
Chr6_23836472	6	23836472	6.38283
Chr6_23836177	6	23836177	6.30369
Chr6_23836039	6	23836039	5.60735
Chr6_23835573	6	23835573	5.77282
Chr6_23834965	6	23834965	5.83196
Chr6_23834932	6	23834932	5.80471
Chr6_23834081	6	23834081	5.93615
Chr6_23833557	6	23833557	6.13986
Chr6_23833114	6	23833114	5.83036
Chr6_23832978	6	23832978	6.19501
Chr6_23832829	6	23832829	6.38058
Chr6_23832461	6	23832461	5.62093
Chr6_23832156	6	23832156	5.77694
Chr6_23831205	6	23831205	5.74843
Chr6_23830813	6	23830813	5.92923
Chr6_23830812	6	23830812	5.63281
Chr6_23829861	6	23829861	5.9679
Chr6_23829452	6	23829452	5.66175
Chr6_23829258	6	23829258	5.76846		LOC_Os06g40050
Chr6_23823991	6	23823991	5.65643	LOC_Os06g40050
Chr6_23823875	6	23823875	5.60324	LOC_Os06g40050
Chr6_23820023	6	23820023	5.98169		LOC_Os06g40040
Chr6_23819575	6	23819575	6.22131		LOC_Os06g40040
Chr6_23818893	6	23818893	5.78854
Chr6_23818208	6	23818208	5.79845
Chr6_23817243	6	23817243	6.90029
Chr6_23816594	6	23816594	5.9367		LOC_Os06g40030
Chr6_23816446	6	23816446	6.23138		LOC_Os06g40030
Chr6_23815670	6	23815670	6.42389		LOC_Os06g40030
Chr6_23810153	6	23810153	5.74778	LOC_Os06g40020
Chr6_23806801	6	23806801	5.85184	LOC_Os06g40020
Chr6_23804991	6	23804991	5.68119		LOC_Os06g40020
Chr6_23804627	6	23804627	5.63507		LOC_Os06g40020
Chr6_23803071	6	23803071	6.10787
Chr6_23792216	6	23792216	7.28799	LOC_Os06g40000
Chr6_23791771	6	23791771	6.83466	LOC_Os06g40000
Chr6_23789725	6	23789725	6.10187	LOC_Os06g39990
Chr6_23784851	6	23784851	6.85835		LOC_Os06g39980
Chr6_23784623	6	23784623	5.62957		LOC_Os06g39980
Chr6_23783218	6	23783218	5.73879
Chr6_23782861	6	23782861	5.68426
Chr6_23782844	6	23782844	6.03916
Chr6_23782559	6	23782559	6.36909
Chr6_23781192	6	23781192	5.70343
Chr6_23777094	6	23777094	5.90742		LOC_Os06g39970
Chr6_23767427	6	23767427	6.05878
Chr6_23767003	6	23767003	7.00868
Chr3_23625095	3	23625095	7.28046	LOC_Os03g42464
Chr3_23407941	3	23407941	6.01372
Chr1_23356684	1	23356684	5.71929		LOC_Os01g41270
Chr1_23356130	1	23356130	5.93429		LOC_Os01g41270
Chr10_22860297	10	22860297	5.98119
Chr3_22408860	3	22408860	8.12067
Chr7_22363002	7	22363002	6.1743		LOC_Os07g37330
Chr3_22359508	3	22359508	5.83053	LOC_Os03g40220
Chr3_22347515	3	22347515	5.74625
Chr3_22336165	3	22336165	6.43644
Chr3_22335182	3	22335182	6.08287
Chr3_22329949	3	22329949	6.21023
Chr3_22326133	3	22326133	6.07022
Chr3_22296038	3	22296038	6.35247		LOC_Os03g40120
Chr3_22295763	3	22295763	5.60557	LOC_Os03g40120
Chr3_22295739	3	22295739	6.70914	LOC_Os03g40120
Chr3_22295738	3	22295738	6.07198	LOC_Os03g40120
Chr3_22295183	3	22295183	5.64552
Chr3_22294797	3	22294797	5.69321
Chr3_22294249	3	22294249	5.87298		LOC_Os03g40110
Chr3_22293933	3	22293933	6.05846		LOC_Os03g40110
Chr3_22293819	3	22293819	5.90259		LOC_Os03g40110
Chr3_22292077	3	22292077	5.73213	LOC_Os03g40110
Chr3_22285969	3	22285969	5.67746	LOC_Os03g40110
Chr3_22276387	3	22276387	5.63318
Chr6_22207685	6	22207685	7.97333		LOC_Os06g37520
Chr4_22002866	4	22002866	6.27868
Chr8_21919798	8	21919798	5.61292
Chr8_21899626	8	21899626	5.85361
Chr8_21885107	8	21885107	5.74441	LOC_Os08g34800
Chr8_21884647	8	21884647	5.60094	LOC_Os08g34800
Chr8_21877898	8	21877898	6.03995
Chr8_21849476	8	21849476	6.15409	LOC_Os08g34760
Chr6_21665442	6	21665442	5.65105		LOC_Os06g36780
Chr9_21553186	9	21553186	5.7475	LOC_Os09g37310
Chr9_21531300	9	21531300	6.21317		LOC_Os09g37270
Chr9_21524574	9	21524574	5.69559	LOC_Os09g37260
Chr4_20112063	4	20112063	6.36752		LOC_Os04g33240
Chr4_20111517	4	20111517	5.98178		LOC_Os04g33240
Chr4_20111273	4	20111273	6.33392		LOC_Os04g33240
Chr4_20111268	4	20111268	6.33984		LOC_Os04g33240
Chr4_20109271	4	20109271	6.00462		LOC_Os04g33230
Chr4_20109180	4	20109180	6.19853		LOC_Os04g33230
Chr4_20108790	4	20108790	5.9739		LOC_Os04g33230
Chr4_20108593	4	20108593	5.76969		LOC_Os04g33230
Chr4_20108563	4	20108563	5.93823		LOC_Os04g33230
Chr4_20108456	4	20108456	6.23292	LOC_Os04g33230
Chr4_20108242	4	20108242	5.75416	LOC_Os04g33230
Chr4_20107421	4	20107421	6.33497	LOC_Os04g33230
Chr4_20106947	4	20106947	5.61331	LOC_Os04g33230
Chr4_20106827	4	20106827	5.73012	LOC_Os04g33230
Chr4_20106404	4	20106404	6.19543	LOC_Os04g33230
Chr4_20105598	4	20105598	6.90562	LOC_Os04g33230
Chr4_20105535	4	20105535	6.18593	LOC_Os04g33230
Chr4_20105433	4	20105433	6.5144	LOC_Os04g33230
Chr4_20105402	4	20105402	6.37351	LOC_Os04g33230
Chr4_20105362	4	20105362	5.64998	LOC_Os04g33230
Chr4_20105332	4	20105332	5.96667	LOC_Os04g33230
Chr4_20105256	4	20105256	5.99336	LOC_Os04g33230
Chr4_20104536	4	20104536	6.29197		LOC_Os04g33220
Chr4_20104225	4	20104225	6.33903		LOC_Os04g33220
Chr4_20103781	4	20103781	5.6387		LOC_Os04g33220
Chr4_20103668	4	20103668	6.18819		LOC_Os04g33220
Chr4_20103575	4	20103575	6.23926		LOC_Os04g33220
Chr4_20103449	4	20103449	6.2773		LOC_Os04g33220
Chr4_20103074	4	20103074	7.40237		LOC_Os04g33220
Chr4_20101598	4	20101598	6.13049	LOC_Os04g33220
Chr4_20100944	4	20100944	6.19466	LOC_Os04g33220
Chr4_20099345	4	20099345	6.20449	LOC_Os04g33210
Chr4_20095821	4	20095821	5.83391	LOC_Os04g33210
Chr4_20094211	4	20094211	6.09921	LOC_Os04g33210
Chr4_20094199	4	20094199	6.01795	LOC_Os04g33210
Chr4_20093788	4	20093788	6.0042		LOC_Os04g33200
Chr4_20093550	4	20093550	5.71755		LOC_Os04g33200
Chr4_20093317	4	20093317	7.19472		LOC_Os04g33200
Chr4_20093238	4	20093238	6.63135		LOC_Os04g33200
Chr4_20092983	4	20092983	6.07305		LOC_Os04g33200
Chr4_20092924	4	20092924	6.17363		LOC_Os04g33200
Chr4_20092655	4	20092655	6.15442		LOC_Os04g33200
Chr4_20090619	4	20090619	6.83873	LOC_Os04g33200
Chr4_20088850	4	20088850	6.43262	LOC_Os04g33200	LOC_Os04g33200
Chr4_20088170	4	20088170	6.16474	LOC_Os04g33200	LOC_Os04g33200
Chr4_20087949	4	20087949	6.32141	LOC_Os04g33200	LOC_Os04g33200
Chr4_20085731	4	20085731	5.96502	LOC_Os04g33200
Chr4_20083348	4	20083348	6.50961
Chr4_20083336	4	20083336	6.58744
Chr4_20081412	4	20081412	7.62439	LOC_Os04g33190
Chr4_20080966	4	20080966	8.12107	LOC_Os04g33190
Chr4_20080887	4	20080887	7.24492	LOC_Os04g33190
Chr4_20079333	4	20079333	7.40521	LOC_Os04g33190
Chr4_20078285	4	20078285	7.01666	LOC_Os04g33190
Chr4_20078021	4	20078021	7.03956	LOC_Os04g33190
Chr4_20077841	4	20077841	7.30908	LOC_Os04g33190
Chr4_20074700	4	20074700	7.65401		LOC_Os04g33180
Chr10_20073993	10	20073993	6.06038	LOC_Os10g37490
Chr4_20073428	4	20073428	9.08046
Chr4_20072303	4	20072303	8.12494		LOC_Os04g33170
Chr4_20071106	4	20071106	7.6916		LOC_Os04g33170
Chr4_20068856	4	20068856	7.44594		LOC_Os04g33160
Chr4_20068573	4	20068573	7.41734		LOC_Os04g33150
Chr4_20068528	4	20068528	5.97833		LOC_Os04g33150
Chr4_20068441	4	20068441	7.86291		LOC_Os04g33150
Chr4_20068420	4	20068420	8.90405		LOC_Os04g33150
Chr4_20068353	4	20068353	7.9464		LOC_Os04g33150
Chr4_20067469	4	20067469	6.93282		LOC_Os04g33150
Chr4_20067427	4	20067427	6.86706		LOC_Os04g33150
Chr4_20067109	4	20067109	7.60562		LOC_Os04g33150
Chr4_20066724	4	20066724	7.40674		LOC_Os04g33150
Chr4_20065200	4	20065200	6.96748	LOC_Os04g33150	LOC_Os04g33140
Chr4_20064960	4	20064960	6.18115		LOC_Os04g33140
Chr4_20064934	4	20064934	7.3992		LOC_Os04g33140
Chr4_20064852	4	20064852	6.4681		LOC_Os04g33140
Chr4_20064491	4	20064491	6.85262		LOC_Os04g33140
Chr4_20064438	4	20064438	7.5467		LOC_Os04g33140
Chr4_20064380	4	20064380	7.90594		LOC_Os04g33140
Chr4_20064326	4	20064326	8.18476		LOC_Os04g33140
Chr4_20064321	4	20064321	7.86083		LOC_Os04g33140
Chr4_20064274	4	20064274	7.43154		LOC_Os04g33140
Chr4_20064015	4	20064015	7.03824	LOC_Os04g33140
Chr4_20064010	4	20064010	7.57817	LOC_Os04g33140
Chr4_20063838	4	20063838	7.27518	LOC_Os04g33140
Chr4_20063419	4	20063419	9.64143	LOC_Os04g33140
Chr4_20063198	4	20063198	6.89835	LOC_Os04g33140
Chr4_20063068	4	20063068	7.29416	LOC_Os04g33140
Chr4_20063052	4	20063052	6.99491	LOC_Os04g33140
Chr4_20062932	4	20062932	6.71428	LOC_Os04g33140
Chr4_20062750	4	20062750	8.42142	LOC_Os04g33140
Chr4_20062707	4	20062707	7.58242	LOC_Os04g33140
Chr4_20062610	4	20062610	7.79274	LOC_Os04g33140
Chr4_20062553	4	20062553	7.45679	LOC_Os04g33140
Chr4_20062504	4	20062504	6.54619	LOC_Os04g33140
Chr4_20062070	4	20062070	7.58454	LOC_Os04g33140
Chr4_20062020	4	20062020	7.45967	LOC_Os04g33140
Chr4_20061767	4	20061767	7.72797
Chr4_20061677	4	20061677	7.66434
Chr4_20061586	4	20061586	7.46041
Chr4_20061469	4	20061469	7.33496
Chr4_20058680	4	20058680	7.15055
Chr4_20054066	4	20054066	7.75206		LOC_Os04g33120
Chr4_20053567	4	20053567	7.74834		LOC_Os04g33120
Chr4_20052256	4	20052256	7.34019	LOC_Os04g33120
Chr4_20049822	4	20049822	6.38339	LOC_Os04g33120
Chr4_20048947	4	20048947	9.54779
Chr4_20048723	4	20048723	7.39262		LOC_Os04g33110
Chr4_20048472	4	20048472	6.9714		LOC_Os04g33110
Chr4_20048373	4	20048373	6.10523		LOC_Os04g33110
Chr4_20048260	4	20048260	7.90002		LOC_Os04g33110
Chr4_20045530	4	20045530	7.73787		LOC_Os04g33115
Chr4_20044962	4	20044962	7.28701
Chr4_20044912	4	20044912	6.49825
Chr4_20044720	4	20044720	7.39617
Chr4_20042565	4	20042565	7.61066
Chr4_20041177	4	20041177	7.33898
Chr4_20040353	4	20040353	7.03041
Chr4_20040319	4	20040319	5.76931
Chr4_20040291	4	20040291	5.9352
Chr4_20039913	4	20039913	6.23364
Chr4_20039627	4	20039627	7.66652
Chr4_20039599	4	20039599	7.61076
Chr4_20038895	4	20038895	7.38155	LOC_Os04g33100
Chr4_20037528	4	20037528	7.68985		LOC_Os04g33090
Chr4_20037452	4	20037452	5.96856		LOC_Os04g33090
Chr4_20037414	4	20037414	7.73433		LOC_Os04g33090
Chr4_20037327	4	20037327	8.25703		LOC_Os04g33090
Chr4_20037180	4	20037180	6.58239		LOC_Os04g33090
Chr4_20037159	4	20037159	7.72358		LOC_Os04g33090
Chr4_20037066	4	20037066	7.79876		LOC_Os04g33090
Chr4_20036929	4	20036929	6.50409		LOC_Os04g33090
Chr4_20036863	4	20036863	7.57585		LOC_Os04g33090
Chr4_20036577	4	20036577	6.18629		LOC_Os04g33090
Chr4_20036531	4	20036531	7.68462	LOC_Os04g33090
Chr4_20036484	4	20036484	7.70201	LOC_Os04g33090
Chr4_20036253	4	20036253	5.74416	LOC_Os04g33090
Chr4_20035480	4	20035480	7.28914	LOC_Os04g33090
Chr4_20035184	4	20035184	6.91311	LOC_Os04g33090
Chr4_20034241	4	20034241	8.14514
Chr4_20033803	4	20033803	8.4139
Chr4_20032279	4	20032279	9.22571
Chr4_20030704	4	20030704	7.12067
Chr4_20029774	4	20029774	7.93321
Chr4_20029574	4	20029574	7.18022
Chr4_20029451	4	20029451	7.83627
Chr4_20029208	4	20029208	7.65745
Chr4_20028450	4	20028450	7.38758
Chr4_20028314	4	20028314	7.28212
Chr4_20028014	4	20028014	6.61115
Chr4_20027956	4	20027956	7.06902
Chr4_20027213	4	20027213	8.2537		LOC_Os04g33080
Chr4_20026209	4	20026209	7.25044		LOC_Os04g33080
Chr4_20025678	4	20025678	7.92329		LOC_Os04g33080
Chr4_20025631	4	20025631	7.29588		LOC_Os04g33080
Chr4_20025465	4	20025465	6.05256		LOC_Os04g33080
Chr4_20025154	4	20025154	6.95146	LOC_Os04g33080	LOC_Os04g33080
Chr4_20023646	4	20023646	7.59316	LOC_Os04g33080
Chr4_20021005	4	20021005	7.20819		LOC_Os04g33070
Chr4_20020414	4	20020414	7.59553		LOC_Os04g33070
Chr4_20020256	4	20020256	5.73474	LOC_Os04g33070
Chr4_20019844	4	20019844	6.27559
Chr4_20009696	4	20009696	7.38163		LOC_Os04g33050
Chr4_20006762	4	20006762	8.08549	LOC_Os04g33040
Chr4_20005540	4	20005540	6.77282		LOC_Os04g33040
Chr4_20003912	4	20003912	7.11361
Chr4_20002310	4	20002310	7.84579
Chr4_20002145	4	20002145	7.72022
Chr4_20001931	4	20001931	7.22589
Chr4_20001533	4	20001533	8.10084
Chr4_20001529	4	20001529	7.83929
Chr4_20001293	4	20001293	8.91225
Chr4_20000981	4	20000981	8.91779
Chr4_20000902	4	20000902	8.08844
Chr4_20000281	4	20000281	8.20945
Chr4_20000192	4	20000192	8.15004
Chr4_19998567	4	19998567	9.43744
Chr4_19998407	4	19998407	7.50518
Chr4_19998335	4	19998335	11.034
Chr4_19998327	4	19998327	8.53118
Chr4_19998223	4	19998223	9.9549
Chr4_19998203	4	19998203	8.9304
Chr4_19998154	4	19998154	9.02261
Chr4_19998148	4	19998148	7.70777
Chr4_19998137	4	19998137	6.48733
Chr4_19998076	4	19998076	6.86651
Chr4_19998055	4	19998055	6.56617
Chr4_19998021	4	19998021	9.94743
Chr4_19997548	4	19997548	6.07886
Chr4_19996759	4	19996759	9.02499
Chr4_19996584	4	19996584	9.51082
Chr4_19996550	4	19996550	7.925
Chr4_19996538	4	19996538	9.53757
Chr4_19996536	4	19996536	9.57952
Chr4_19996522	4	19996522	8.60949
Chr4_19995908	4	19995908	8.0887	LOC_Os04g33030
Chr4_19994028	4	19994028	8.04119		LOC_Os04g33030
Chr4_19993511	4	19993511	9.27622		LOC_Os04g33030
Chr4_19993510	4	19993510	9.32125		LOC_Os04g33030
Chr4_19992804	4	19992804	6.17981		LOC_Os04g33030
Chr4_19992648	4	19992648	5.95098		LOC_Os04g33030
Chr9_18360343	9	18360343	6.30637		LOC_Os09g30170
Chr3_17879911	3	17879911	5.65681
Chr9_17797728	9	17797728	6.35112
Chr9_17717121	9	17717121	5.95802
Chr6_17485155	6	17485155	5.79793
Chr10_17403718	10	17403718	6.68545
Chr3_17392510	3	17392510	6.05993
Chr3_17390137	3	17390137	5.62501		LOC_Os03g30470
Chr3_17390099	3	17390099	5.88295		LOC_Os03g30470
Chr3_17390003	3	17390003	5.70662		LOC_Os03g30470
Chr3_17374189	3	17374189	5.64884		LOC_Os03g30450
Chr3_17373103	3	17373103	5.82188		LOC_Os03g30450
Chr3_17372945	3	17372945	5.92662		LOC_Os03g30450
Chr3_17372310	3	17372310	5.68324	LOC_Os03g30450
Chr3_17370713	3	17370713	5.84816	LOC_Os03g30450
Chr3_17369480	3	17369480	5.706	LOC_Os03g30450
Chr3_17367439	3	17367439	5.6239	LOC_Os03g30450
Chr3_17364975	3	17364975	5.70994	LOC_Os03g30450
Chr3_17364562	3	17364562	5.85417	LOC_Os03g30450
Chr3_17360011	3	17360011	5.72237		LOC_Os03g30440
Chr3_17359645	3	17359645	5.82266		LOC_Os03g30440
Chr3_17359637	3	17359637	5.91912		LOC_Os03g30440
Chr3_17355205	3	17355205	5.96249
Chr3_17351025	3	17351025	5.97739		LOC_Os03g30430
Chr3_17331481	3	17331481	5.60436
Chr12_17299567	12	17299567	5.8938
Chr3_17281242	3	17281242	5.64467
Chr3_17279068	3	17279068	5.68884	LOC_Os03g30280
Chr3_17275111	3	17275111	5.71832		LOC_Os03g30270
Chr12_17274415	12	17274415	6.35419
Chr12_17195790	12	17195790	6.3425	LOC_Os12g29040
Chr3_17186375	3	17186375	5.96173	LOC_Os03g30110
Chr3_17184510	3	17184510	5.76861	LOC_Os03g30110
Chr3_17182106	3	17182106	5.79799	LOC_Os03g30110
Chr3_17180800	3	17180800	7.33753	LOC_Os03g30100
Chr3_17180421	3	17180421	7.18063	LOC_Os03g30100
Chr3_17180304	3	17180304	6.0032	LOC_Os03g30100
Chr3_17142185	3	17142185	5.73269
Chr3_17142162	3	17142162	5.91434
Chr3_17137416	3	17137416	5.88908		LOC_Os03g30030
Chr3_17136528	3	17136528	6.11701		LOC_Os03g30030
Chr3_17131537	3	17131537	5.64918
Chr3_17128585	3	17128585	5.79092
Chr3_17126617	3	17126617	5.98258	LOC_Os03g30020
Chr3_17126546	3	17126546	5.64286	LOC_Os03g30020
Chr3_17126491	3	17126491	5.72662	LOC_Os03g30020
Chr3_17126482	3	17126482	5.69726	LOC_Os03g30020
Chr3_17125676	3	17125676	6.07247		LOC_Os03g30020
Chr3_17123994	3	17123994	6.07512
Chr3_17121507	3	17121507	5.62198		LOC_Os03g30010
Chr3_17121464	3	17121464	6.59584		LOC_Os03g30010
Chr3_17119645	3	17119645	6.45346	LOC_Os03g30010
Chr3_17119619	3	17119619	5.64751	LOC_Os03g30010
Chr3_17119158	3	17119158	5.64405
Chr3_17117613	3	17117613	5.60277
Chr3_17114732	3	17114732	6.08835		LOC_Os03g30000
Chr3_17107960	3	17107960	5.62953		LOC_Os03g29990
Chr3_17107534	3	17107534	5.72354		LOC_Os03g29990
Chr3_17091367	3	17091367	5.65939		LOC_Os03g29980
Chr3_17088866	3	17088866	5.64627
Chr3_17073250	3	17073250	5.64553
Chr3_17072945	3	17072945	7.77995
Chr12_17011362	12	17011362	7.78062	LOC_Os12g28770
Chr3_16817621	3	16817621	5.69462	LOC_Os03g29510
Chr8_16617652	8	16617652	6.05899		LOC_Os08g27210
Chr8_16616050	8	16616050	5.81833		LOC_Os08g27200
Chr8_16615399	8	16615399	6.5281		LOC_Os08g27200
Chr8_16615051	8	16615051	6.0507		LOC_Os08g27200
Chr8_16615048	8	16615048	5.99436		LOC_Os08g27200
Chr8_16611552	8	16611552	6.21297	LOC_Os08g27190
Chr8_16611493	8	16611493	5.97938	LOC_Os08g27190
Chr8_16604879	8	16604879	6.38032
Chr8_16602422	8	16602422	6.25824	LOC_Os08g27180
Chr8_16599207	8	16599207	5.91633	LOC_Os08g27180
Chr8_16598513	8	16598513	5.89911	LOC_Os08g27180
Chr7_16444020	7	16444020	6.53937
Chr5_16383338	5	16383338	6.21732
Chr8_16354236	8	16354236	5.63478		LOC_Os08g26875
Chr8_16073951	8	16073951	5.69659
Chr8_15847076	8	15847076	5.83833		LOC_Os08g26050
Chr10_15636970	10	15636970	6.40482		LOC_Os10g30090
Chr1_15385228	1	15385228	6.28332	LOC_Os01g27570
Chr1_15184886	1	15184886	6.57904
Chr3_15079856	3	15079856	6.38991	LOC_Os03g26380
Chr9_14103859	9	14103859	5.64774		LOC_Os09g23725
Chr10_13794321	10	13794321	6.65459
Chr10_13774785	10	13774785	6.652
Chr10_13764880	10	13764880	5.97236		LOC_Os10g26450
Chr3_13680184	3	13680184	6.06232		LOC_Os03g24100
Chr3_13654104	3	13654104	6.02076	LOC_Os03g24050
Chr3_13653659	3	13653659	5.7501	LOC_Os03g24050
Chr3_13653273	3	13653273	6.18915	LOC_Os03g24050
Chr3_13652255	3	13652255	5.99836	LOC_Os03g24050
Chr3_13650018	3	13650018	5.83184
Chr3_13649593	3	13649593	5.64715
Chr3_13649452	3	13649452	5.86422
Chr3_13649224	3	13649224	6.05223
Chr3_13649184	3	13649184	6.56072
Chr3_13647686	3	13647686	6.35285
Chr3_13647553	3	13647553	5.95452
Chr3_13643860	3	13643860	5.61792
Chr3_13643234	3	13643234	5.72845
Chr3_13642566	3	13642566	5.84709
Chr3_13642346	3	13642346	5.69554
Chr3_13641932	3	13641932	5.96973
Chr3_13641335	3	13641335	5.63323
Chr3_13640833	3	13640833	6.54192
Chr3_13640207	3	13640207	6.00373
Chr3_13639524	3	13639524	6.82876
Chr3_13639047	3	13639047	5.72025		LOC_Os03g24040
Chr3_13638337	3	13638337	5.99489		LOC_Os03g24040
Chr3_13637851	3	13637851	6.04503		LOC_Os03g24040
Chr1_13330142	1	13330142	5.76826
Chr1_13306413	1	13306413	5.67718
Chr10_13304549	10	13304549	5.96301		LOC_Os10g25680
Chr1_13299293	1	13299293	6.44787	LOC_Os01g23640
Chr1_13298685	1	13298685	5.7654	LOC_Os01g23640
Chr8_12993153	8	12993153	5.62314
Chr1_12955287	1	12955287	5.60253	LOC_Os01g23020
Chr1_12955263	1	12955263	6.68388	LOC_Os01g23020
Chr1_12322438	1	12322438	5.78939
Chr1_12290451	1	12290451	5.85543
Chr1_12237260	1	12237260	5.65222	LOC_Os01g21820
Chr1_12234726	1	12234726	5.65575	LOC_Os01g21810
Chr1_12233787	1	12233787	5.87273	LOC_Os01g21810
Chr1_12233786	1	12233786	5.92199	LOC_Os01g21810
Chr1_12233276	1	12233276	5.8019	LOC_Os01g21810
Chr1_12226073	1	12226073	5.70134		LOC_Os01g21790
Chr1_12226042	1	12226042	5.76442		LOC_Os01g21790
Chr1_12219858	1	12219858	5.68105		LOC_Os01g21780
Chr1_12218476	1	12218476	6.38222		LOC_Os01g21780
Chr1_12218094	1	12218094	6.79581
Chr1_12216739	1	12216739	5.80437
Chr1_12216276	1	12216276	6.61991
Chr1_12215414	1	12215414	6.72412
Chr1_12215154	1	12215154	5.74295
Chr1_12214731	1	12214731	7.35211
Chr1_12214324	1	12214324	5.97158
Chr1_12214155	1	12214155	5.94056
Chr1_12214094	1	12214094	6.39759
Chr1_12213840	1	12213840	5.84325
Chr1_12213719	1	12213719	5.67421
Chr1_12213678	1	12213678	6.38224
Chr1_12212682	1	12212682	6.71241
Chr1_12212589	1	12212589	5.91836
Chr1_12211871	1	12211871	6.53587
Chr1_12211586	1	12211586	5.80787
Chr1_12211515	1	12211515	5.90564
Chr1_12211298	1	12211298	6.95222
Chr1_12210955	1	12210955	5.65355
Chr1_12210539	1	12210539	5.83114	LOC_Os01g21760
Chr1_12210177	1	12210177	5.70723	LOC_Os01g21760
Chr1_12208756	1	12208756	7.47838		LOC_Os01g21760
Chr1_12208656	1	12208656	7.80092		LOC_Os01g21760
Chr1_12208565	1	12208565	7.13597		LOC_Os01g21760
Chr1_12208112	1	12208112	7.20681		LOC_Os01g21760
Chr1_12208079	1	12208079	7.13826		LOC_Os01g21760
Chr1_12207960	1	12207960	7.3957		LOC_Os01g21760
Chr1_12207779	1	12207779	7.02337		LOC_Os01g21750
Chr1_12207695	1	12207695	7.71544		LOC_Os01g21750
Chr1_12207486	1	12207486	7.98382		LOC_Os01g21750
Chr1_12207350	1	12207350	7.31895		LOC_Os01g21750
Chr1_12206938	1	12206938	7.47094		LOC_Os01g21750
Chr1_12206865	1	12206865	6.02472		LOC_Os01g21750
Chr1_12206821	1	12206821	5.80075		LOC_Os01g21750
Chr1_12206731	1	12206731	6.17414		LOC_Os01g21750
Chr1_12206595	1	12206595	6.3092		LOC_Os01g21750
Chr1_12206066	1	12206066	6.64585		LOC_Os01g21740
Chr1_12205785	1	12205785	6.22527	LOC_Os01g21750	LOC_Os01g21740
Chr1_12205710	1	12205710	6.13693	LOC_Os01g21750	LOC_Os01g21740
Chr1_12205602	1	12205602	6.99285	LOC_Os01g21750	LOC_Os01g21740
Chr1_12205456	1	12205456	5.63761		LOC_Os01g21740
Chr1_12205145	1	12205145	6.29243		LOC_Os01g21740
Chr1_12205071	1	12205071	5.61192		LOC_Os01g21740
Chr1_12204674	1	12204674	6.75387		LOC_Os01g21740
Chr1_12204573	1	12204573	7.18304		LOC_Os01g21740
Chr1_12204365	1	12204365	7.6043		LOC_Os01g21740
Chr1_12203723	1	12203723	5.95666	LOC_Os01g21740
Chr1_12203602	1	12203602	7.51383	LOC_Os01g21740
Chr1_12203188	1	12203188	7.03034
Chr1_12200960	1	12200960	6.55737		LOC_Os01g21730
Chr1_12199099	1	12199099	6.70423		LOC_Os01g21730
Chr1_12198579	1	12198579	5.76992	LOC_Os01g21730
Chr1_12198395	1	12198395	5.76771	LOC_Os01g21730
Chr1_12198333	1	12198333	5.93831	LOC_Os01g21730
Chr1_12198226	1	12198226	6.19382
Chr1_12198205	1	12198205	5.94146
Chr1_12197845	1	12197845	7.06527
Chr1_12197481	1	12197481	6.86569
Chr1_12197431	1	12197431	6.47477
Chr1_12197386	1	12197386	6.10228
Chr1_12197131	1	12197131	6.05454
Chr1_12196606	1	12196606	6.49634
Chr1_12196599	1	12196599	6.60478
Chr1_12195936	1	12195936	5.73527
Chr1_12194713	1	12194713	5.81239
Chr1_12194660	1	12194660	6.84025
Chr1_12194398	1	12194398	6.19221
Chr1_12194347	1	12194347	5.99864
Chr1_12194019	1	12194019	6.75704
Chr1_12193806	1	12193806	6.95929
Chr1_12193672	1	12193672	6.6027
Chr1_12193628	1	12193628	6.81166
Chr1_12193612	1	12193612	6.28348
Chr1_12193592	1	12193592	5.98476
Chr1_12193448	1	12193448	6.60846
Chr1_12192890	1	12192890	5.85639
Chr1_12192409	1	12192409	5.8332
Chr1_12190404	1	12190404	6.04722		LOC_Os01g21720
Chr1_12190003	1	12190003	6.16044		LOC_Os01g21720
Chr1_12189683	1	12189683	5.76313		LOC_Os01g21720
Chr1_12188849	1	12188849	7.16014	LOC_Os01g21720
Chr1_12188664	1	12188664	6.73287	LOC_Os01g21720
Chr1_12188337	1	12188337	6.24052	LOC_Os01g21720
Chr1_12188211	1	12188211	6.4952	LOC_Os01g21720
Chr1_12186766	1	12186766	6.11719	LOC_Os01g21710
Chr1_12186393	1	12186393	5.86684	LOC_Os01g21710
Chr1_12184982	1	12184982	6.21171	LOC_Os01g21710
Chr1_12184395	1	12184395	5.9036		LOC_Os01g21710
Chr1_12184278	1	12184278	6.24851		LOC_Os01g21710
Chr1_12184122	1	12184122	6.08125		LOC_Os01g21710
Chr1_12183589	1	12183589	6.39905		LOC_Os01g21710
Chr1_12178951	1	12178951	5.63924
Chr1_12178919	1	12178919	6.38198
Chr1_12178743	1	12178743	5.86825
Chr1_12153184	1	12153184	5.79546		LOC_Os01g21660
Chr1_12151734	1	12151734	5.71094
Chr1_12147175	1	12147175	5.97775
Chr1_12146110	1	12146110	6.0768
Chr1_12145031	1	12145031	6.06947
Chr1_12142437	1	12142437	5.6609
Chr1_12142297	1	12142297	5.65991
Chr1_12138434	1	12138434	5.66338
Chr1_12118403	1	12118403	5.67427	LOC_Os01g21630
Chr1_12114251	1	12114251	5.61583
Chr1_12111236	1	12111236	6.76574		LOC_Os01g21620
Chr1_12086790	1	12086790	6.49
Chr1_12086776	1	12086776	5.77786
Chr1_12086465	1	12086465	5.81718
Chr1_12083118	1	12083118	6.37848
Chr1_12082251	1	12082251	5.89022
Chr1_12072817	1	12072817	5.8435		LOC_Os01g21580
Chr1_12070658	1	12070658	5.83065
Chr1_12064658	1	12064658	5.9042
Chr1_12062886	1	12062886	5.70832
Chr1_12062584	1	12062584	7.103
Chr1_12062519	1	12062519	6.03161
Chr1_12062023	1	12062023	5.78176
Chr1_12061873	1	12061873	6.03987
Chr1_12060296	1	12060296	7.42405
Chr1_12059892	1	12059892	6.1217
Chr1_12059013	1	12059013	6.22028
Chr1_12056507	1	12056507	6.65464		LOC_Os01g21550
Chr1_12052432	1	12052432	5.60309
Chr1_12037566	1	12037566	6.43903	LOC_Os01g21530
Chr1_11998716	1	11998716	5.89739
Chr1_11992687	1	11992687	5.60766	LOC_Os01g21480
Chr1_11987334	1	11987334	6.20254
Chr1_11985485	1	11985485	6.42188
Chr1_11985465	1	11985465	5.79562
Chr1_11941051	1	11941051	6.10187
Chr1_11941001	1	11941001	5.60472
Chr1_11940198	1	11940198	6.20584
Chr1_11939757	1	11939757	6.12238
Chr1_11939101	1	11939101	5.73297		LOC_Os01g21360
Chr1_11939095	1	11939095	6.27033		LOC_Os01g21360
Chr1_11939062	1	11939062	5.62485		LOC_Os01g21360
Chr1_11929484	1	11929484	5.86843
Chr1_11928293	1	11928293	5.79835
Chr1_11920598	1	11920598	6.39791
Chr1_11919673	1	11919673	5.82968		LOC_Os01g21340
Chr1_11912039	1	11912039	5.71588		LOC_Os01g21320
Chr1_11881781	1	11881781	5.66937
Chr1_11868828	1	11868828	7.00807
Chr1_11863367	1	11863367	6.76246
Chr1_11852675	1	11852675	6.38822
Chr1_11851242	1	11851242	5.68316
Chr1_11850860	1	11850860	6.53379
Chr1_11850825	1	11850825	5.97052
Chr1_11849800	1	11849800	5.64402
Chr1_11849504	1	11849504	6.34366
Chr1_11845626	1	11845626	5.8045
Chr1_11845259	1	11845259	5.64448
Chr1_11845246	1	11845246	5.96932
Chr1_11837981	1	11837981	5.75675	LOC_Os01g21210
Chr1_11837973	1	11837973	6.06432	LOC_Os01g21210
Chr1_11836918	1	11836918	5.91073	LOC_Os01g21210
Chr1_11788974	1	11788974	5.62029
Chr1_11787706	1	11787706	6.33641
Chr1_11725805	1	11725805	7.24492		LOC_Os01g21000
Chr1_11725452	1	11725452	6.57741		LOC_Os01g21000
Chr1_11676271	1	11676271	5.65933		LOC_Os01g20900
Chr10_11668517	10	11668517	7.85436	LOC_Os10g22520
Chr10_11668188	10	11668188	7.38607	LOC_Os10g22520
Chr10_11668181	10	11668181	7.46672	LOC_Os10g22520
Chr10_11668142	10	11668142	7.40398	LOC_Os10g22520
Chr10_11666913	10	11666913	7.0541	LOC_Os10g22520
Chr10_11664836	10	11664836	7.6051	LOC_Os10g22510
Chr10_11662174	10	11662174	8.26414		LOC_Os10g22510
Chr10_11661878	10	11661878	7.20367		LOC_Os10g22510
Chr10_11661358	10	11661358	7.16635		LOC_Os10g22510
Chr10_11661339	10	11661339	8.16342		LOC_Os10g22510
Chr10_11658687	10	11658687	7.8796	LOC_Os10g22484
Chr10_11658438	10	11658438	8.22557	LOC_Os10g22484
Chr10_11658368	10	11658368	9.03153	LOC_Os10g22484
Chr10_11658272	10	11658272	8.44889	LOC_Os10g22484
Chr10_11656346	10	11656346	9.03975	LOC_Os10g22484
Chr10_11655002	10	11655002	9.21116	LOC_Os10g22484
Chr10_11653386	10	11653386	6.37282	LOC_Os10g22484
Chr10_11652539	10	11652539	7.43352	LOC_Os10g22484
Chr10_11652294	10	11652294	7.1863	LOC_Os10g22484
Chr10_11650959	10	11650959	8.29433	LOC_Os10g22484
Chr1_11650564	1	11650564	5.61453
Chr10_11649441	10	11649441	6.49361
Chr1_11648511	1	11648511	5.7882
Chr10_11646766	10	11646766	6.53541
Chr1_11607976	1	11607976	5.93877
Chr1_11573024	1	11573024	6.47611
Chr1_10685181	1	10685181	5.92038
Chr10_10197974	10	10197974	6.54996	LOC_Os10g20280
Chr10_10197973	10	10197973	6.26488	LOC_Os10g20280
Chr10_10196610	10	10196610	5.66615
Chr10_10196272	10	10196272	6.04492
Chr8_10033306	8	10033306	6.2324
Chr1_9983867	1	9983867	5.7767
Chr1_9983466	1	9983466	6.10939
Chr1_9981233	1	9981233	6.22539
Chr1_9978950	1	9978950	6.08019
Chr1_9977893	1	9977893	5.66828
Chr1_9976604	1	9976604	6.29404
Chr1_9976434	1	9976434	5.73182
Chr1_9972988	1	9972988	5.70257
Chr1_9964128	1	9964128	6.09635	LOC_Os01g17320
Chr1_9963587	1	9963587	6.5228	LOC_Os01g17320
Chr1_9963091	1	9963091	5.89206	LOC_Os01g17320
Chr1_9961121	1	9961121	7.00446		LOC_Os01g17320
Chr1_9960944	1	9960944	6.61142		LOC_Os01g17320
Chr1_9960885	1	9960885	5.62701		LOC_Os01g17320
Chr1_9960558	1	9960558	6.15224		LOC_Os01g17310
Chr1_9959890	1	9959890	6.00052		LOC_Os01g17310
Chr1_9956568	1	9956568	6.25306
Chr1_9956391	1	9956391	5.82859
Chr1_9956342	1	9956342	6.56423
Chr1_9956335	1	9956335	6.60846
Chr1_9955930	1	9955930	5.78712
Chr1_9955702	1	9955702	6.04996
Chr1_9955648	1	9955648	6.18209	LOC_Os01g17300
Chr1_9952666	1	9952666	7.30893		LOC_Os01g17300
Chr1_9952386	1	9952386	5.72168		LOC_Os01g17300
Chr1_9952175	1	9952175	5.7094		LOC_Os01g17300
Chr1_9951975	1	9951975	6.19332
Chr1_9951967	1	9951967	7.12125
Chr1_9951877	1	9951877	5.91914
Chr1_9948732	1	9948732	6.54358		LOC_Os01g17279
Chr1_9948199	1	9948199	5.95641		LOC_Os01g17279
Chr1_9944535	1	9944535	6.06249	LOC_Os01g17279
Chr1_9944146	1	9944146	6.16219	LOC_Os01g17279
Chr1_9943477	1	9943477	5.81964	LOC_Os01g17279
Chr1_9942707	1	9942707	6.44709	LOC_Os01g17279
Chr1_9941191	1	9941191	6.1144	LOC_Os01g17279
Chr1_9936605	1	9936605	5.66298
Chr1_9935348	1	9935348	6.10762	LOC_Os01g17260
Chr1_9931040	1	9931040	5.93871	LOC_Os01g17260
Chr1_9928682	1	9928682	6.72535		LOC_Os01g17260
Chr1_9926748	1	9926748	6.04938
Chr1_9926663	1	9926663	5.96889
Chr1_9922966	1	9922966	5.67783		LOC_Os01g17250
Chr1_9917493	1	9917493	5.81509	LOC_Os01g17250
Chr1_9917242	1	9917242	5.93938	LOC_Os01g17240
Chr1_9914729	1	9914729	6.01474	LOC_Os01g17240
Chr1_9912968	1	9912968	6.24472		LOC_Os01g17240
Chr1_9912154	1	9912154	6.39489		LOC_Os01g17240
Chr1_9911008	1	9911008	6.02193
Chr1_9909800	1	9909800	7.91362
Chr1_9909625	1	9909625	5.82163
Chr1_9909316	1	9909316	6.39591
Chr1_9909210	1	9909210	7.08225
Chr1_9909181	1	9909181	9.11777
Chr1_9909089	1	9909089	7.60416
Chr1_9908430	1	9908430	6.46751
Chr1_9908394	1	9908394	5.63611
Chr1_9908262	1	9908262	5.60845
Chr1_9907785	1	9907785	6.26564
Chr1_9907661	1	9907661	6.76861
Chr1_9907541	1	9907541	6.79764
Chr1_9907506	1	9907506	8.06967
Chr1_9907098	1	9907098	6.61933
Chr1_9907096	1	9907096	6.44013
Chr1_9905594	1	9905594	6.93541
Chr1_9905189	1	9905189	5.75272
Chr1_9905139	1	9905139	5.6575
Chr1_9905122	1	9905122	6.54629
Chr1_9904648	1	9904648	5.8506		LOC_Os01g17214
Chr1_9904428	1	9904428	5.70997		LOC_Os01g17214
Chr1_9904147	1	9904147	6.06605		LOC_Os01g17214
Chr1_9903969	1	9903969	8.17563		LOC_Os01g17214
Chr1_9903951	1	9903951	7.45031		LOC_Os01g17214
Chr1_9902869	1	9902869	6.1349		LOC_Os01g17214
Chr1_9900027	1	9900027	6.26347	LOC_Os01g17214
Chr1_9899326	1	9899326	6.45552	LOC_Os01g17214
Chr1_9897145	1	9897145	5.64684	LOC_Os01g17214
Chr1_9877641	1	9877641	6.72574		LOC_Os01g17180
Chr1_9876450	1	9876450	6.21181	LOC_Os01g17170
Chr1_9876431	1	9876431	6.34103	LOC_Os01g17170
Chr1_9873348	1	9873348	7.25486		LOC_Os01g17170
Chr11_9262571	11	9262571	6.16152		LOC_Os11g16710
Chr4_8360249	4	8360249	5.8214		LOC_Os04g14860
Chr1_7965859	1	7965859	8.1627
Chr1_7963648	1	7963648	5.71765	LOC_Os01g14200
Chr1_7957879	1	7957879	7.13823	LOC_Os01g14200
Chr1_7957623	1	7957623	8.12662	LOC_Os01g14200
Chr1_7953197	1	7953197	7.11809		LOC_Os01g14200
Chr1_7936151	1	7936151	5.6137		LOC_Os01g14160
Chr1_7847140	1	7847140	8.10178		LOC_Os01g14010
Chr1_7838691	1	7838691	9.49342		LOC_Os01g13990
Chr1_7800204	1	7800204	5.71171
Chr1_7800203	1	7800203	5.71426
Chr1_7761115	1	7761115	5.95241
Chr1_7700671	1	7700671	6.74928
Chr1_7700171	1	7700171	6.11252
Chr1_7699303	1	7699303	5.85793
Chr1_7697304	1	7697304	5.7635
Chr1_7669858	1	7669858	5.70286		LOC_Os01g13700
Chr1_7669791	1	7669791	5.95689		LOC_Os01g13700
Chr1_7669728	1	7669728	5.85127		LOC_Os01g13700
Chr1_7669701	1	7669701	5.94683		LOC_Os01g13700
Chr1_7669700	1	7669700	5.89086		LOC_Os01g13700
Chr1_7669697	1	7669697	5.77511		LOC_Os01g13700
Chr1_7669566	1	7669566	5.81969		LOC_Os01g13700
Chr1_7669521	1	7669521	5.68774		LOC_Os01g13700
Chr1_7669495	1	7669495	5.65212		LOC_Os01g13700
Chr1_7669073	1	7669073	5.90177		LOC_Os01g13700
Chr1_7669061	1	7669061	7.08729		LOC_Os01g13700
Chr1_7669034	1	7669034	6.09087		LOC_Os01g13700
Chr1_7668792	1	7668792	7.52927		LOC_Os01g13700
Chr1_7668788	1	7668788	6.11649		LOC_Os01g13700
Chr1_7668785	1	7668785	6.25497		LOC_Os01g13700
Chr1_7668736	1	7668736	6.80592		LOC_Os01g13700
Chr1_7668689	1	7668689	6.19302		LOC_Os01g13700
Chr1_7668559	1	7668559	5.7899		LOC_Os01g13700
Chr1_7668384	1	7668384	7.87677		LOC_Os01g13700
Chr1_7667525	1	7667525	6.20598	LOC_Os01g13690
Chr1_7664623	1	7664623	6.12965		LOC_Os01g13690
Chr1_7664298	1	7664298	7.51288		LOC_Os01g13690
Chr1_7664273	1	7664273	6.25495		LOC_Os01g13690
Chr1_7641116	1	7641116	5.89208
Chr1_7640121	1	7640121	5.60602	LOC_Os01g13620
Chr1_7635061	1	7635061	7.33718		LOC_Os01g13620
Chr1_7632537	1	7632537	5.62198
Chr1_7632306	1	7632306	5.60471
Chr1_7534037	1	7534037	5.65309
Chr1_7527244	1	7527244	6.27841		LOC_Os01g13500
Chr1_7525159	1	7525159	6.05155
Chr12_7426064	12	7426064	6.58817	LOC_Os12g13300
Chr12_7426062	12	7426062	6.60631	LOC_Os12g13300
Chr6_7131087	6	7131087	5.71315	LOC_Os06g13020
Chr6_7112304	6	7112304	5.8826
Chr6_7085490	6	7085490	5.73058	LOC_Os06g12950
Chr6_7056095	6	7056095	5.8126	LOC_Os06g12882
Chr6_7051414	6	7051414	5.60978	LOC_Os06g12876
Chr6_7041906	6	7041906	6.13245
Chr6_7039129	6	7039129	9.41849		LOC_Os06g12860
Chr6_7039055	6	7039055	11.2559		LOC_Os06g12860
Chr6_7038306	6	7038306	6.43507	LOC_Os06g12860
Chr6_7037527	6	7037527	6.31501	LOC_Os06g12860
Chr6_7037476	6	7037476	11.3872	LOC_Os06g12860
Chr6_7037337	6	7037337	5.66303	LOC_Os06g12860
Chr6_7036720	6	7036720	11.9335
Chr6_7035560	6	7035560	6.30815
Chr6_7034809	6	7034809	13.0121
Chr6_7034225	6	7034225	10.2141		LOC_Os06g12850
Chr6_7034054	6	7034054	9.00051		LOC_Os06g12850
Chr6_7034049	6	7034049	13.4731		LOC_Os06g12850
Chr6_7033931	6	7033931	6.52935		LOC_Os06g12850
Chr6_7033893	6	7033893	7.60198		LOC_Os06g12850
Chr6_7033878	6	7033878	7.53041		LOC_Os06g12850
Chr6_7033828	6	7033828	6.68678		LOC_Os06g12850
Chr6_7033271	6	7033271	10.2096		LOC_Os06g12850
Chr6_7032880	6	7032880	11.2782		LOC_Os06g12850
Chr6_7031828	6	7031828	11.0169	LOC_Os06g12850
Chr6_7030955	6	7030955	10.4476
Chr6_7030797	6	7030797	11.7058
Chr6_7030707	6	7030707	10.5856
Chr6_7030227	6	7030227	10.728
Chr6_7029780	6	7029780	11.8098
Chr6_7029584	6	7029584	6.45156
Chr6_7028921	6	7028921	6.79291		LOC_Os06g12840
Chr6_7028550	6	7028550	6.25591		LOC_Os06g12840
Chr6_7028382	6	7028382	6.03837		LOC_Os06g12840
Chr6_7028359	6	7028359	7.07387		LOC_Os06g12840
Chr6_7027787	6	7027787	12.3438		LOC_Os06g12840
Chr6_7027778	6	7027778	7.30005		LOC_Os06g12840
Chr6_7027591	6	7027591	7.15439		LOC_Os06g12840
Chr6_7027244	6	7027244	5.79974		LOC_Os06g12840
Chr6_7025357	6	7025357	11.0643
Chr6_7025295	6	7025295	12.2208
Chr6_7025277	6	7025277	5.72462
Chr6_7025048	6	7025048	6.23033
Chr6_7024873	6	7024873	9.88253
Chr6_7024152	6	7024152	11.0953
Chr6_7022827	6	7022827	11.2449		LOC_Os06g12830
Chr6_7022823	6	7022823	11.7629		LOC_Os06g12830
Chr6_7021283	6	7021283	6.21431	LOC_Os06g12830
Chr6_7020488	6	7020488	11.3441	LOC_Os06g12830
Chr6_7019983	6	7019983	11.6012	LOC_Os06g12830
Chr6_7019948	6	7019948	12.4121	LOC_Os06g12830
Chr6_7019425	6	7019425	8.33565
Chr6_7019366	6	7019366	5.88079
Chr6_7018974	6	7018974	11.1198
Chr6_7017839	6	7017839	6.1323
Chr6_7017165	6	7017165	7.10479
Chr6_7016988	6	7016988	6.09557
Chr6_7016915	6	7016915	6.19659
Chr6_7016874	6	7016874	6.07966
Chr6_7016833	6	7016833	10.3668
Chr6_7016656	6	7016656	5.71618
Chr6_7016295	6	7016295	9.24956
Chr6_7015925	6	7015925	9.56162
Chr6_7015771	6	7015771	5.63131
Chr6_7015473	6	7015473	10.7618
Chr6_7015402	6	7015402	6.27815
Chr6_7015389	6	7015389	6.13419
Chr6_7015347	6	7015347	5.6339
Chr6_7015332	6	7015332	5.72802
Chr6_7015251	6	7015251	6.57115
Chr6_7014839	6	7014839	5.86334
Chr6_7014826	6	7014826	6.63371
Chr6_7014542	6	7014542	11.5099
Chr6_7014359	6	7014359	5.99653
Chr6_7014355	6	7014355	11.8667
Chr6_7014333	6	7014333	11.1865
Chr6_7014195	6	7014195	5.98774
Chr6_7014033	6	7014033	5.63537
Chr6_7013908	6	7013908	5.85918
Chr6_7013618	6	7013618	11.5415
Chr6_7013275	6	7013275	7.53515
Chr6_7013062	6	7013062	10.4459
Chr6_7012650	6	7012650	6.44625
Chr6_7012376	6	7012376	9.27429
Chr6_7012098	6	7012098	6.9801
Chr6_7011733	6	7011733	5.91871
Chr6_7011696	6	7011696	6.03371
Chr6_7011216	6	7011216	8.28139
Chr6_7010978	6	7010978	12.056
Chr6_7010114	6	7010114	10.2889		LOC_Os06g12820
Chr6_7009948	6	7009948	11.3635		LOC_Os06g12820
Chr6_7009541	6	7009541	9.63939		LOC_Os06g12820
Chr6_7009533	6	7009533	10.1207		LOC_Os06g12820
Chr6_7009504	6	7009504	5.81444		LOC_Os06g12820
Chr6_7008950	6	7008950	10.6836		LOC_Os06g12820
Chr6_7008916	6	7008916	9.18143		LOC_Os06g12820
Chr6_7008890	6	7008890	6.03114		LOC_Os06g12820
Chr6_7008845	6	7008845	6.5206		LOC_Os06g12820
Chr6_7008764	6	7008764	8.65099		LOC_Os06g12820
Chr6_7008734	6	7008734	7.84761		LOC_Os06g12820
Chr6_7007711	6	7007711	5.89706	LOC_Os06g12820
Chr6_7007554	6	7007554	10.643	LOC_Os06g12820
Chr6_7007200	6	7007200	5.7665	LOC_Os06g12820
Chr6_7006099	6	7006099	5.62954	LOC_Os06g12820	LOC_Os06g12810
Chr6_7006059	6	7006059	6.4225	LOC_Os06g12820	LOC_Os06g12810
Chr6_7005314	6	7005314	11.3361		LOC_Os06g12810
Chr6_7003659	6	7003659	9.46402	LOC_Os06g12810
Chr6_7003399	6	7003399	11.7125	LOC_Os06g12810
Chr6_7002660	6	7002660	11.8155	LOC_Os06g12810
Chr6_7002095	6	7002095	11.2602	LOC_Os06g12810
Chr6_6999987	6	6999987	10.1625
Chr6_6999423	6	6999423	9.68387
Chr6_6997849	6	6997849	6.69653		LOC_Os06g12800
Chr6_6996133	6	6996133	10.4706	LOC_Os06g12800
Chr6_6995955	6	6995955	10.0574	LOC_Os06g12800
Chr6_6995952	6	6995952	9.46185	LOC_Os06g12800
Chr6_6995933	6	6995933	10.5238	LOC_Os06g12800
Chr6_6995932	6	6995932	10.7902	LOC_Os06g12800
Chr6_6995623	6	6995623	11.0193	LOC_Os06g12800
Chr6_6995408	6	6995408	9.8403	LOC_Os06g12800
Chr6_6995267	6	6995267	9.48883
Chr6_6995207	6	6995207	11.6157
Chr6_6995106	6	6995106	8.49886
Chr6_6994901	6	6994901	6.29063
Chr6_6994515	6	6994515	10.0368	LOC_Os06g12790
Chr6_6993268	6	6993268	9.47721	LOC_Os06g12790
Chr6_6993058	6	6993058	11.6931	LOC_Os06g12790
Chr6_6992009	6	6992009	11.6947	LOC_Os06g12790
Chr6_6990453	6	6990453	11.884		LOC_Os06g12790
Chr6_6989633	6	6989633	10.3905		LOC_Os06g12790
Chr6_6965191	6	6965191	6.18135		LOC_Os06g12760
Chr6_6962858	6	6962858	5.62949
Chr6_6961169	6	6961169	6.16614
Chr6_6959305	6	6959305	6.43828		LOC_Os06g12750
Chr6_6949731	6	6949731	6.47921		LOC_Os06g12720
Chr6_6936730	6	6936730	5.61324		LOC_Os06g12710
Chr6_6936396	6	6936396	5.75887
Chr6_6935117	6	6935117	5.81031
Chr6_6935110	6	6935110	6.31581
Chr6_6933986	6	6933986	5.96039		LOC_Os06g12690
Chr6_6933103	6	6933103	6.0718		LOC_Os06g12690
Chr6_6932381	6	6932381	5.68968	LOC_Os06g12690
Chr6_6931492	6	6931492	6.22876	LOC_Os06g12690
Chr6_6927221	6	6927221	5.68839
Chr6_6926541	6	6926541	6.05575		LOC_Os06g12680
Chr6_6916583	6	6916583	5.9008
Chr6_6898884	6	6898884	5.75366	LOC_Os06g12640
Chr6_6895684	6	6895684	6.34283		LOC_Os06g12630
Chr6_6884885	6	6884885	5.93991
Chr6_6879927	6	6879927	6.52741		LOC_Os06g12620
Chr6_6879583	6	6879583	6.24144	LOC_Os06g12620
Chr6_6879577	6	6879577	6.5123	LOC_Os06g12620
Chr6_6879525	6	6879525	6.27208	LOC_Os06g12620
Chr6_6879131	6	6879131	6.10129	LOC_Os06g12620
Chr6_6879086	6	6879086	5.75171	LOC_Os06g12620
Chr6_6878990	6	6878990	5.61482	LOC_Os06g12620
Chr6_6876933	6	6876933	5.7119
Chr6_6876114	6	6876114	6.25464
Chr6_6875233	6	6875233	6.51236
Chr6_6868562	6	6868562	5.68867	LOC_Os06g12610
Chr6_6862737	6	6862737	12.4151
Chr6_6853218	6	6853218	5.87025
Chr6_6851101	6	6851101	6.17247
Chr6_6850083	6	6850083	6.05017
Chr6_6847599	6	6847599	5.96256	LOC_Os06g12600
Chr6_6838009	6	6838009	6.22832
Chr6_6834096	6	6834096	5.65901		LOC_Os06g12590
Chr6_6832717	6	6832717	14.3983	LOC_Os06g12590
Chr6_6830286	6	6830286	15.6536	LOC_Os06g12590
Chr6_6823164	6	6823164	5.95196	LOC_Os06g12590
Chr6_6821536	6	6821536	5.89224		LOC_Os06g12580
Chr6_6820916	6	6820916	15.1095		LOC_Os06g12580
Chr6_6809950	6	6809950	6.63587	LOC_Os06g12560
Chr6_6808697	6	6808697	7.64765
Chr6_6799372	6	6799372	9.47328
Chr6_6798743	6	6798743	10
Chr6_6792888	6	6792888	8.56666		LOC_Os06g12510
Chr6_6779214	6	6779214	9.62951	LOC_Os06g12480
Chr6_6760419	6	6760419	7.98983	LOC_Os06g12460
Chr6_6752888	6	6752888	10	LOC_Os06g12450
Chr6_6752887	6	6752887	10	LOC_Os06g12450
Chr6_6747298	6	6747298	10		LOC_Os06g12450
Chr6_6745643	6	6745643	9.88055
Chr6_6737863	6	6737863	8.2612
Chr6_6710536	6	6710536	15.4775		LOC_Os06g12380
Chr6_6706432	6	6706432	6.7182
Chr6_6687883	6	6687883	10.2267		LOC_Os06g12330
Chr6_6671104	6	6671104	6.39722
Chr6_6669462	6	6669462	5.89942
Chr6_6667809	6	6667809	5.81573
Chr6_6653023	6	6653023	14.4775		LOC_Os06g12310
Chr6_6635225	6	6635225	14.8754
Chr6_6620235	6	6620235	9.86172
Chr6_6612229	6	6612229	9.24146		LOC_Os06g12290
Chr6_6601669	6	6601669	8.15468	LOC_Os06g12260
Chr6_6587420	6	6587420	7.47239
Chr6_6581765	6	6581765	10
Chr6_6581196	6	6581196	12.268
Chr6_6577922	6	6577922	11.109
Chr6_6558482	6	6558482	8.86385
Chr6_6551261	6	6551261	11.9304
Chr6_6519962	6	6519962	12.1609
Chr6_6518528	6	6518528	6.04361	LOC_Os06g12170
Chr6_6487587	6	6487587	5.73566	LOC_Os06g12120
Chr6_6487586	6	6487586	5.66251	LOC_Os06g12120
Chr6_6442110	6	6442110	14.2644	LOC_Os06g12030
Chr6_6250399	6	6250399	6.00411		LOC_Os06g11800
Chr5_6225817	5	6225817	5.95162	LOC_Os05g11080
Chr6_6195835	6	6195835	5.86002		LOC_Os06g11690
Chr6_6155185	6	6155185	5.91215		LOC_Os06g11610
Chr6_6012136	6	6012136	6.82734
Chr8_6010254	8	6010254	6.06854
Chr6_5982675	6	5982675	6.62986	LOC_Os06g11380	LOC_Os06g11370
Chr6_5976246	6	5976246	7.13668	LOC_Os06g11360
Chr6_5974612	6	5974612	6.98405		LOC_Os06g11360
Chr6_5965913	6	5965913	5.78374	LOC_Os06g11350
Chr6_5941693	6	5941693	5.66557
Chr6_5929348	6	5929348	6.18745		LOC_Os06g11308
Chr6_5892812	6	5892812	6.03155	LOC_Os06g11230	LOC_Os06g11220
Chr6_5877851	6	5877851	5.83225		LOC_Os06g11190
Chr5_5802128	5	5802128	6.29868
Chr6_5794260	6	5794260	6.49979	LOC_Os06g11050
Chr5_5592638	5	5592638	6.29654
Chr5_5592611	5	5592611	9.18513
Chr5_5518378	5	5518378	5.73139		LOC_Os05g09732
Chr7_5502000	7	5502000	5.77832	LOC_Os07g10250
Chr5_5481440	5	5481440	6.30548	LOC_Os05g09708
Chr7_5465075	7	5465075	6.15021
Chr6_5459665	6	5459665	6.90947
Chr6_5420756	6	5420756	9.7855		LOC_Os06g10520
Chr7_5414922	7	5414922	7.2695
Chr7_5410308	7	5410308	7.71351		LOC_Os07g10090
Chr6_5398396	6	5398396	9.13277	LOC_Os06g10480
Chr6_5380833	6	5380833	9.22095
Chr6_5321614	6	5321614	7.49546		LOC_Os06g10360
Chr9_5295479	9	5295479	5.78985	LOC_Os09g09770
Chr6_5276001	6	5276001	6.4159
Chr6_5273038	6	5273038	8.43483
Chr6_5263012	6	5263012	6.76661
Chr6_5257364	6	5257364	9.33331		LOC_Os06g10250
Chr6_5187470	6	5187470	5.8495	LOC_Os06g10140
Chr6_5179208	6	5179208	5.98721		LOC_Os06g10130
Chr6_5138967	6	5138967	8.69965		LOC_Os06g10090
Chr6_5094129	6	5094129	9.62844
Chr2_4959968	2	4959968	5.99298		LOC_Os02g09650
Chr2_4950267	2	4950267	6.88272	LOC_Os02g09630
Chr2_4949216	2	4949216	7.90052
Chr2_4948628	2	4948628	6.72441
Chr2_4945325	2	4945325	9.1294	LOC_Os02g09620
Chr2_4944074	2	4944074	6.13587	LOC_Os02g09610	LOC_Os02g09600
Chr2_4941460	2	4941460	7.3324	LOC_Os02g09600	LOC_Os02g09610
Chr2_4937311	2	4937311	7.18035	LOC_Os02g09590
Chr2_4932635	2	4932635	7.37647		LOC_Os02g09580
Chr2_4932127	2	4932127	6.44523		LOC_Os02g09580
Chr2_4927667	2	4927667	5.75942	LOC_Os02g09569
Chr2_4920213	2	4920213	5.73447	LOC_Os02g09550
Chr1_4916377	1	4916377	6.4448
Chr4_4914940	4	4914940	7.79608
Chr2_4913949	2	4913949	5.98337		LOC_Os02g09540
Chr2_4913843	2	4913843	7.67827		LOC_Os02g09540
Chr2_4905549	2	4905549	7.69221		LOC_Os02g09520
Chr2_4904961	2	4904961	6.2833
Chr2_4901081	2	4901081	6.38497
Chr1_4833721	1	4833721	8.8256
Chr6_4720066	6	4720066	5.83393
Chr6_4562705	6	4562705	6.57167	LOC_Os06g09060
Chr6_4553876	6	4553876	7.89575		LOC_Os06g09040
Chr6_4550200	6	4550200	6.53619
Chr6_4544839	6	4544839	5.68635
Chr6_4543541	6	4543541	5.82453
Chr6_4535688	6	4535688	6.43963
Chr6_4535537	6	4535537	9.24895
Chr6_4535430	6	4535430	6.27196
Chr6_4535359	6	4535359	7.86611
Chr6_4535213	6	4535213	9.18964
Chr6_4534942	6	4534942	7.56738	LOC_Os06g09000
Chr6_4534818	6	4534818	7.9484	LOC_Os06g09000
Chr6_4534666	6	4534666	8.45941		LOC_Os06g09000
Chr6_4534589	6	4534589	8.22631		LOC_Os06g09000
Chr6_4534484	6	4534484	7.82913		LOC_Os06g09000
Chr6_4534312	6	4534312	8.11275		LOC_Os06g09000
Chr6_4534159	6	4534159	7.94655		LOC_Os06g09000
Chr6_4534097	6	4534097	7.84905		LOC_Os06g09000
Chr6_4533984	6	4533984	7.84019		LOC_Os06g09000
Chr6_4533805	6	4533805	8.11919		LOC_Os06g09000
Chr6_4533769	6	4533769	7.72689		LOC_Os06g09000
Chr6_4533286	6	4533286	9.72148		LOC_Os06g09000
Chr6_4533085	6	4533085	9.37964		LOC_Os06g09000
Chr6_4532716	6	4532716	8.27424		LOC_Os06g09000
Chr6_4532396	6	4532396	7.39059	LOC_Os06g08990	LOC_Os06g08980
Chr6_4532262	6	4532262	7.18851	LOC_Os06g08990	LOC_Os06g08980
Chr6_4528169	6	4528169	5.70627
Chr6_4526918	6	4526918	5.90404	LOC_Os06g08970	LOC_Os06g08960
Chr6_4525657	6	4525657	7.02494		LOC_Os06g08960
Chr6_4525402	6	4525402	6.05841		LOC_Os06g08960
Chr6_4516816	6	4516816	6.0069		LOC_Os06g08950
Chr6_4496995	6	4496995	6.98687		LOC_Os06g08920
Chr6_4496481	6	4496481	5.7065		LOC_Os06g08920
Chr6_4494460	6	4494460	5.75809		LOC_Os06g08910
Chr6_4490492	6	4490492	5.8453	LOC_Os06g08910
Chr6_4488110	6	4488110	5.81129		LOC_Os06g08900
Chr6_4487151	6	4487151	6.78192	LOC_Os06g08900
Chr6_4486261	6	4486261	6.05053	LOC_Os06g08900
Chr6_4486172	6	4486172	6.20315	LOC_Os06g08900
Chr6_4485927	6	4485927	5.82418	LOC_Os06g08900
Chr6_4485915	6	4485915	6.58138	LOC_Os06g08900
Chr6_4485790	6	4485790	6.22358	LOC_Os06g08900
Chr6_4485661	6	4485661	7.08302	LOC_Os06g08900
Chr6_4485551	6	4485551	7.0249	LOC_Os06g08900
Chr6_4481707	6	4481707	6.59354	LOC_Os06g08900
Chr6_4481337	6	4481337	6.40803	LOC_Os06g08900
Chr6_4481336	6	4481336	6.72069	LOC_Os06g08900
Chr6_4481223	6	4481223	6.48318
Chr6_4481138	6	4481138	6.80234
Chr6_4481101	6	4481101	6.06929
Chr6_4481054	6	4481054	6.45612
Chr6_4481025	6	4481025	7.23125
Chr6_4480992	6	4480992	7.14283
Chr6_4480961	6	4480961	5.94063
Chr6_4480955	6	4480955	6.33848
Chr6_4480883	6	4480883	6.25743
Chr6_4466828	6	4466828	6.36787
Chr6_4466806	6	4466806	6.55657
Chr6_4466666	6	4466666	6.1688
Chr6_4466652	6	4466652	5.64328
Chr6_4466443	6	4466443	5.74949
Chr6_4466423	6	4466423	5.89564
Chr6_4466102	6	4466102	6.44533
Chr6_4466019	6	4466019	5.71704
Chr6_4465965	6	4465965	5.97592
Chr6_4465917	6	4465917	5.60967
Chr6_4465877	6	4465877	5.94978
Chr6_4465771	6	4465771	5.89078
Chr6_4465744	6	4465744	6.06632
Chr6_4465709	6	4465709	5.76249
Chr6_4465691	6	4465691	6.20161
Chr6_4465631	6	4465631	5.96615
Chr6_4465621	6	4465621	7.20812
Chr6_4465613	6	4465613	6.51881
Chr6_4465600	6	4465600	5.60266
Chr6_4465566	6	4465566	5.60722
Chr6_4465489	6	4465489	5.7983
Chr6_4465413	6	4465413	6.23239
Chr6_4453218	6	4453218	6.25588
Chr6_4448231	6	4448231	6.71446		LOC_Os06g08860
Chr6_4448225	6	4448225	6.55263		LOC_Os06g08860
Chr6_4448039	6	4448039	7.46897		LOC_Os06g08860
Chr6_4448035	6	4448035	7.31848		LOC_Os06g08860
Chr6_4448031	6	4448031	6.93903		LOC_Os06g08860
Chr6_4447754	6	4447754	6.51307		LOC_Os06g08860
Chr6_4447639	6	4447639	5.99327		LOC_Os06g08860
Chr6_4447382	6	4447382	5.82537		LOC_Os06g08860
Chr6_4447377	6	4447377	5.83887		LOC_Os06g08860
Chr6_4447040	6	4447040	5.68202		LOC_Os06g08860
Chr6_4447039	6	4447039	5.87129		LOC_Os06g08860
Chr6_4447036	6	4447036	5.85822		LOC_Os06g08860
Chr6_4447019	6	4447019	5.64865		LOC_Os06g08860
Chr6_4446564	6	4446564	5.91979		LOC_Os06g08860
Chr6_4446543	6	4446543	6.48377		LOC_Os06g08860
Chr6_4446531	6	4446531	8.54442		LOC_Os06g08860
Chr6_4446464	6	4446464	7.86638	LOC_Os06g08860
Chr6_4446455	6	4446455	7.68602	LOC_Os06g08860
Chr6_4446406	6	4446406	6.49078	LOC_Os06g08860
Chr6_4446401	6	4446401	7.82825	LOC_Os06g08860
Chr6_4446312	6	4446312	6.43156	LOC_Os06g08860
Chr6_4446206	6	4446206	6.8496	LOC_Os06g08860
Chr6_4446198	6	4446198	6.2487	LOC_Os06g08860
Chr6_4446196	6	4446196	6.62147	LOC_Os06g08860
Chr6_4446192	6	4446192	6.63287	LOC_Os06g08860
Chr6_4446167	6	4446167	6.80155	LOC_Os06g08860
Chr6_4446159	6	4446159	6.36339	LOC_Os06g08860
Chr6_4446128	6	4446128	6.50501	LOC_Os06g08860
Chr6_4445938	6	4445938	6.83189	LOC_Os06g08860
Chr6_4445850	6	4445850	6.46029	LOC_Os06g08860
Chr6_4445785	6	4445785	7.26496	LOC_Os06g08860
Chr6_4445782	6	4445782	7.07279	LOC_Os06g08860
Chr6_4445750	6	4445750	6.82114	LOC_Os06g08860
Chr6_4445716	6	4445716	7.97317	LOC_Os06g08860
Chr6_4445706	6	4445706	7.85536	LOC_Os06g08860
Chr6_4445399	6	4445399	6.87115	LOC_Os06g08860
Chr6_4445275	6	4445275	5.80325	LOC_Os06g08860
Chr6_4445274	6	4445274	5.82279	LOC_Os06g08860
Chr6_4445238	6	4445238	6.75922	LOC_Os06g08860
Chr6_4445221	6	4445221	6.78666	LOC_Os06g08860
Chr6_4445114	6	4445114	6.82808	LOC_Os06g08860
Chr6_4445027	6	4445027	7.52211	LOC_Os06g08860
Chr6_4444874	6	4444874	6.70287	LOC_Os06g08860
Chr6_4444844	6	4444844	6.89955	LOC_Os06g08860
Chr6_4444838	6	4444838	6.83804	LOC_Os06g08860
Chr6_4444703	6	4444703	6.27327	LOC_Os06g08860
Chr6_4444694	6	4444694	6.88534	LOC_Os06g08860
Chr6_4444498	6	4444498	6.93865	LOC_Os06g08860
Chr6_4444475	6	4444475	6.77485	LOC_Os06g08860
Chr6_4444417	6	4444417	6.9256	LOC_Os06g08860
Chr6_4444409	6	4444409	7.03013	LOC_Os06g08860
Chr6_4444258	6	4444258	7.07539	LOC_Os06g08860
Chr6_4443845	6	4443845	6.974	LOC_Os06g08860
Chr6_4443715	6	4443715	6.90458	LOC_Os06g08860
Chr6_4443609	6	4443609	6.95557	LOC_Os06g08860
Chr6_4443237	6	4443237	5.79132	LOC_Os06g08860
Chr6_4441867	6	4441867	6.6999	LOC_Os06g08850
Chr6_4439169	6	4439169	8.51038	LOC_Os06g08850
Chr6_4438038	6	4438038	6.43416	LOC_Os06g08850
Chr6_4438015	6	4438015	6.01854	LOC_Os06g08850
Chr6_4437613	6	4437613	6.27407	LOC_Os06g08850
Chr6_4437274	6	4437274	6.33285	LOC_Os06g08850	LOC_Os06g08850
Chr6_4436707	6	4436707	8.39902		LOC_Os06g08850
Chr6_4436334	6	4436334	8.86966		LOC_Os06g08850
Chr6_4433070	6	4433070	6.39065
Chr6_4431300	6	4431300	5.61587	LOC_Os06g08840
Chr6_4430229	6	4430229	5.78116	LOC_Os06g08840
Chr6_4426235	6	4426235	5.62109
Chr6_4425791	6	4425791	6.41487
Chr6_4415296	6	4415296	5.8455
Chr6_4415085	6	4415085	6.88157
Chr6_4413396	6	4413396	5.70573
Chr6_4407604	6	4407604	7.18034		LOC_Os06g08810
Chr6_4404931	6	4404931	5.61251	LOC_Os06g08810
Chr6_4403927	6	4403927	5.60604
Chr6_4357731	6	4357731	6.29151
Chr6_4356391	6	4356391	5.64275
Chr9_4260389	9	4260389	5.63483		LOC_Os09g08224
Chr9_4259755	9	4259755	8.25694		LOC_Os09g08210
Chr9_4257839	9	4257839	5.76868	LOC_Os09g08210
Chr9_4257374	9	4257374	5.60733	LOC_Os09g08210
Chr9_4255484	9	4255484	5.95525
Chr6_4229849	6	4229849	6.51004	LOC_Os06g08550
Chr9_4225231	9	4225231	5.75161
Chr6_4220179	6	4220179	5.76204		LOC_Os06g08530
Chr9_4212128	9	4212128	6.17763		LOC_Os09g08140
Chr6_4211997	6	4211997	5.79698
Chr6_4211940	6	4211940	5.64406
Chr6_4209242	6	4209242	6.19705
Chr6_4209172	6	4209172	7.11482
Chr6_4209050	6	4209050	6.55725
Chr6_4207553	6	4207553	7.24214		LOC_Os06g08520
Chr6_4207431	6	4207431	7.06468		LOC_Os06g08520
Chr6_4207402	6	4207402	6.69509		LOC_Os06g08520
Chr6_4207364	6	4207364	7.20639		LOC_Os06g08520
Chr6_4207330	6	4207330	5.95648		LOC_Os06g08520
Chr6_4206127	6	4206127	7.97844	LOC_Os06g08520
Chr6_4205547	6	4205547	5.80491	LOC_Os06g08520
Chr6_4204483	6	4204483	6.14561		LOC_Os06g08510
Chr6_4204089	6	4204089	6.82507		LOC_Os06g08510
Chr6_4204067	6	4204067	6.48132		LOC_Os06g08510
Chr6_4204044	6	4204044	6.95474		LOC_Os06g08510
Chr6_4204038	6	4204038	6.84355		LOC_Os06g08510
Chr6_4203999	6	4203999	7.03587		LOC_Os06g08510
Chr6_4203852	6	4203852	5.71154		LOC_Os06g08510
Chr6_4203788	6	4203788	6.28512		LOC_Os06g08510
Chr6_4203637	6	4203637	6.34362		LOC_Os06g08510
Chr6_4203628	6	4203628	6.31427		LOC_Os06g08510
Chr6_4203477	6	4203477	5.77325		LOC_Os06g08510
Chr6_4203013	6	4203013	6.23198		LOC_Os06g08510
Chr6_4202807	6	4202807	6.07744	LOC_Os06g08510
Chr6_4202769	6	4202769	5.69781	LOC_Os06g08510
Chr6_4201827	6	4201827	6.22467	LOC_Os06g08510
Chr6_4201503	6	4201503	6.13224	LOC_Os06g08510
Chr6_4201227	6	4201227	6.47106	LOC_Os06g08510
Chr9_4182595	9	4182595	6.03362
Chr3_4162978	3	4162978	6.07825
Chr3_4159528	3	4159528	5.8601
Chr3_4139445	3	4139445	5.64095	LOC_Os03g08110
Chr3_4135829	3	4135829	6.08296	LOC_Os03g08100
Chr3_4086352	3	4086352	7.04323
Chr10_3788204	10	3788204	5.65033		LOC_Os10g07210
Chr3_3627026	3	3627026	5.86453	LOC_Os03g07100	LOC_Os03g07090
Chr3_3611482	3	3611482	6.42598
Chr3_3611248	3	3611248	7.65893
Chr3_3600587	3	3600587	6.78661		LOC_Os03g07050
Chr6_3570742	6	3570742	5.66993		LOC_Os06g07430
Chr6_3476663	6	3476663	5.70288
Chr6_3425123	6	3425123	7.23148
Chr6_3424782	6	3424782	7.32137
Chr6_3424651	6	3424651	6.53477
Chr6_3424336	6	3424336	6.30276
Chr6_3418787	6	3418787	6.93031		LOC_Os06g07140
Chr6_3408323	6	3408323	7.67987		LOC_Os06g07130
Chr6_3408086	6	3408086	8.76738		LOC_Os06g07130
Chr6_3404875	6	3404875	8.82786		LOC_Os06g07120
Chr6_3403384	6	3403384	6.3596		LOC_Os06g07120
Chr6_3376428	6	3376428	5.83487		LOC_Os06g07090
Chr6_3360003	6	3360003	6.0113		LOC_Os06g07070
Chr6_3359860	6	3359860	6.16676		LOC_Os06g07070
Chr6_3359167	6	3359167	5.64832		LOC_Os06g07070
Chr6_3349280	6	3349280	6.63747
Chr6_3334722	6	3334722	9.48544
Chr6_3333591	6	3333591	6.89233
Chr6_3329594	6	3329594	8.78565	LOC_Os06g07020
Chr6_3329403	6	3329403	7.87326	LOC_Os06g07020
Chr6_3315535	6	3315535	7.07366		LOC_Os06g06990
Chr6_3315345	6	3315345	6.6585	LOC_Os06g06980	LOC_Os06g06990
Chr6_3315058	6	3315058	6.42698	LOC_Os06g06980	LOC_Os06g06990
Chr6_3314803	6	3314803	5.80094	LOC_Os06g06980
Chr6_3314154	6	3314154	6.87428	LOC_Os06g06980
Chr6_3314143	6	3314143	6.08671	LOC_Os06g06980
Chr6_3314105	6	3314105	5.83104		LOC_Os06g06980
Chr6_3313836	6	3313836	5.61485		LOC_Os06g06980
Chr6_3313725	6	3313725	5.6699		LOC_Os06g06980
Chr6_3313667	6	3313667	6.28865		LOC_Os06g06980
Chr6_3313593	6	3313593	6.09037		LOC_Os06g06980
Chr6_3313199	6	3313199	5.75332		LOC_Os06g06980
Chr6_3313125	6	3313125	6.36199		LOC_Os06g06980
Chr6_3312767	6	3312767	7.09563		LOC_Os06g06980
Chr6_3312684	6	3312684	5.65453		LOC_Os06g06980
Chr6_3312598	6	3312598	5.6843		LOC_Os06g06980
Chr6_3310448	6	3310448	6.59639		LOC_Os06g06970
Chr6_3310376	6	3310376	7.64755		LOC_Os06g06970
Chr6_3310371	6	3310371	6.89437		LOC_Os06g06970
Chr6_3310341	6	3310341	6.73261		LOC_Os06g06970
Chr6_3310336	6	3310336	5.66844		LOC_Os06g06970
Chr6_3310301	6	3310301	6.65356		LOC_Os06g06970
Chr6_3308331	6	3308331	6.45761		LOC_Os06g06960
Chr6_3308330	6	3308330	7.87578		LOC_Os06g06960
Chr6_3308311	6	3308311	8.25136		LOC_Os06g06960
Chr6_3308307	6	3308307	5.66344		LOC_Os06g06960
Chr6_3308306	6	3308306	5.97923		LOC_Os06g06960
Chr6_3308215	6	3308215	6.59741		LOC_Os06g06960
Chr6_3308202	6	3308202	5.8243		LOC_Os06g06960
Chr6_3308170	6	3308170	5.60311		LOC_Os06g06960
Chr6_3308135	6	3308135	6.20674		LOC_Os06g06960
Chr6_3308117	6	3308117	6.04939		LOC_Os06g06960
Chr6_3308088	6	3308088	6.58651		LOC_Os06g06960
Chr6_3308082	6	3308082	5.78292		LOC_Os06g06960
Chr6_3308074	6	3308074	6.6753		LOC_Os06g06960
Chr6_3308058	6	3308058	6.64634		LOC_Os06g06960
Chr6_3308047	6	3308047	6.9891		LOC_Os06g06960
Chr6_3308023	6	3308023	6.86507		LOC_Os06g06960
Chr6_3307991	6	3307991	6.85346		LOC_Os06g06960
Chr6_3307966	6	3307966	7.27054		LOC_Os06g06960
Chr6_3307807	6	3307807	6.75394	LOC_Os06g06960
Chr6_3307794	6	3307794	7.37335	LOC_Os06g06960
Chr6_3307621	6	3307621	6.33796	LOC_Os06g06960
Chr6_3307606	6	3307606	6.21786	LOC_Os06g06960
Chr6_3307576	6	3307576	6.0741	LOC_Os06g06960
Chr6_3307556	6	3307556	7.04793	LOC_Os06g06960
Chr6_3307539	6	3307539	9.00013	LOC_Os06g06960
Chr6_3307533	6	3307533	8.34263	LOC_Os06g06960
Chr6_3307530	6	3307530	7.89183	LOC_Os06g06960
Chr6_3307451	6	3307451	5.94407	LOC_Os06g06960
Chr6_3307450	6	3307450	6.10551	LOC_Os06g06960
Chr6_3307449	6	3307449	5.98597	LOC_Os06g06960
Chr6_3307445	6	3307445	6.10466	LOC_Os06g06960
Chr6_3307444	6	3307444	6.07921	LOC_Os06g06960
Chr6_3307435	6	3307435	6.08045	LOC_Os06g06960
Chr6_3307434	6	3307434	5.9789	LOC_Os06g06960
Chr6_3307429	6	3307429	5.99487	LOC_Os06g06960
Chr6_3307428	6	3307428	5.95405	LOC_Os06g06960
Chr6_3307415	6	3307415	6.39474	LOC_Os06g06960
Chr6_3307405	6	3307405	6.43408	LOC_Os06g06960
Chr6_3307401	6	3307401	5.71762	LOC_Os06g06960
Chr6_3307400	6	3307400	5.8513	LOC_Os06g06960
Chr6_3307399	6	3307399	6.48777	LOC_Os06g06960
Chr6_3307390	6	3307390	7.76555	LOC_Os06g06960
Chr6_3307387	6	3307387	7.12043	LOC_Os06g06960
Chr6_3307375	6	3307375	6.5372	LOC_Os06g06960
Chr6_3307372	6	3307372	6.22657	LOC_Os06g06960
Chr6_3307371	6	3307371	6.1996	LOC_Os06g06960
Chr6_3307365	6	3307365	5.69438	LOC_Os06g06960
Chr6_3307333	6	3307333	6.4087	LOC_Os06g06960
Chr6_3307324	6	3307324	6.71837	LOC_Os06g06960
Chr6_3307321	6	3307321	6.73939	LOC_Os06g06960
Chr6_3307312	6	3307312	6.71797	LOC_Os06g06960
Chr6_3307306	6	3307306	6.71365	LOC_Os06g06960
Chr6_3307300	6	3307300	6.84811	LOC_Os06g06960
Chr6_3307297	6	3307297	7.50828	LOC_Os06g06960
Chr6_3307269	6	3307269	8.3968	LOC_Os06g06960
Chr6_3306781	6	3306781	5.80139	LOC_Os06g06960
Chr6_3306751	6	3306751	5.81342	LOC_Os06g06960
Chr6_3306520	6	3306520	6.15599	LOC_Os06g06960
Chr6_3306511	6	3306511	6.02295	LOC_Os06g06960
Chr6_3306502	6	3306502	6.53489	LOC_Os06g06960
Chr6_3306497	6	3306497	5.94881	LOC_Os06g06960
Chr6_3306489	6	3306489	7.22094	LOC_Os06g06960
Chr6_3306487	6	3306487	7.12576	LOC_Os06g06960
Chr6_3306486	6	3306486	7.0559	LOC_Os06g06960
Chr6_3306485	6	3306485	7.12831	LOC_Os06g06960
Chr6_3306479	6	3306479	7.06588	LOC_Os06g06960
Chr6_3306469	6	3306469	6.92038	LOC_Os06g06960
Chr6_3306468	6	3306468	6.96751	LOC_Os06g06960
Chr6_3306463	6	3306463	6.94204	LOC_Os06g06960
Chr6_3306457	6	3306457	6.69629	LOC_Os06g06960
Chr6_3306430	6	3306430	5.91282	LOC_Os06g06960
Chr6_3306417	6	3306417	9.4539	LOC_Os06g06960
Chr6_3306408	6	3306408	7.27347	LOC_Os06g06960
Chr6_3306398	6	3306398	6.74052	LOC_Os06g06960
Chr6_3306311	6	3306311	5.84625	LOC_Os06g06960
Chr6_3306187	6	3306187	8.50054	LOC_Os06g06960
Chr6_3306178	6	3306178	10.9864	LOC_Os06g06960
Chr6_3306172	6	3306172	11.2179	LOC_Os06g06960
Chr6_3306161	6	3306161	5.81877	LOC_Os06g06960
Chr6_3306136	6	3306136	6.92207	LOC_Os06g06960
Chr6_3306101	6	3306101	6.94136	LOC_Os06g06960
Chr6_3306084	6	3306084	6.91369	LOC_Os06g06960
Chr6_3306059	6	3306059	6.62756	LOC_Os06g06960
Chr6_3306058	6	3306058	6.63066	LOC_Os06g06960
Chr6_3306028	6	3306028	6.15443	LOC_Os06g06960
Chr6_3306024	6	3306024	6.14959	LOC_Os06g06960
Chr6_3306021	6	3306021	6.14899	LOC_Os06g06960
Chr6_3306016	6	3306016	6.605	LOC_Os06g06960
Chr6_3305962	6	3305962	6.17475	LOC_Os06g06960
Chr6_3305950	6	3305950	5.86641	LOC_Os06g06960
Chr6_3305920	6	3305920	5.75419	LOC_Os06g06960
Chr6_3305860	6	3305860	6.89059	LOC_Os06g06960
Chr6_3305835	6	3305835	6.83208	LOC_Os06g06960
Chr6_3305827	6	3305827	6.50813	LOC_Os06g06960
Chr6_3305814	6	3305814	6.60725	LOC_Os06g06960
Chr6_3305812	6	3305812	5.77417	LOC_Os06g06960
Chr6_3305767	6	3305767	6.61272	LOC_Os06g06960
Chr6_3305695	6	3305695	7.63351	LOC_Os06g06960
Chr6_3305626	6	3305626	6.68139	LOC_Os06g06960
Chr6_3305614	6	3305614	6.99241	LOC_Os06g06960
Chr6_3305596	6	3305596	7.38771	LOC_Os06g06960
Chr6_3305485	6	3305485	7.18613	LOC_Os06g06960
Chr6_3305436	6	3305436	6.98552	LOC_Os06g06960
Chr6_3305362	6	3305362	5.95432	LOC_Os06g06960
Chr6_3305345	6	3305345	6.61349	LOC_Os06g06960
Chr6_3305331	6	3305331	6.77858	LOC_Os06g06960
Chr6_3305320	6	3305320	6.50436	LOC_Os06g06960
Chr6_3305289	6	3305289	6.80552	LOC_Os06g06960
Chr6_3305234	6	3305234	6.90985	LOC_Os06g06960
Chr6_3305214	6	3305214	6.9562	LOC_Os06g06960
Chr6_3305201	6	3305201	6.49106	LOC_Os06g06960
Chr6_3305138	6	3305138	6.92715		LOC_Os06g06950
Chr6_3305065	6	3305065	6.7094		LOC_Os06g06950
Chr6_3305019	6	3305019	6.9101		LOC_Os06g06950
Chr6_3304990	6	3304990	6.80136		LOC_Os06g06950
Chr6_3304939	6	3304939	6.01908		LOC_Os06g06950
Chr6_3304790	6	3304790	6.90243		LOC_Os06g06950
Chr6_3304751	6	3304751	6.1112		LOC_Os06g06950
Chr6_3304494	6	3304494	6.96991		LOC_Os06g06950
Chr6_3304392	6	3304392	6.64065		LOC_Os06g06950
Chr6_3304272	6	3304272	5.89584		LOC_Os06g06950
Chr6_3304200	6	3304200	7.33164		LOC_Os06g06950
Chr6_3304182	6	3304182	8.37283		LOC_Os06g06950
Chr6_3303899	6	3303899	8.07243		LOC_Os06g06950
Chr6_3303838	6	3303838	6.48686		LOC_Os06g06950
Chr6_3303831	6	3303831	5.69457		LOC_Os06g06950
Chr6_3303821	6	3303821	6.01704		LOC_Os06g06950
Chr6_3303813	6	3303813	6.64496		LOC_Os06g06950
Chr6_3303803	6	3303803	6.9107		LOC_Os06g06950
Chr6_3303668	6	3303668	10.0914		LOC_Os06g06950
Chr6_3303663	6	3303663	10.2952		LOC_Os06g06950
Chr6_3303656	6	3303656	9.19972		LOC_Os06g06950
Chr6_3303624	6	3303624	8.91402		LOC_Os06g06950
Chr6_3303617	6	3303617	7.81322		LOC_Os06g06950
Chr6_3303616	6	3303616	7.91043		LOC_Os06g06950
Chr6_3303610	6	3303610	7.87086		LOC_Os06g06950
Chr6_3303219	6	3303219	6.11159		LOC_Os06g06950
Chr6_3302957	6	3302957	6.93668	LOC_Os06g06950
Chr6_3302810	6	3302810	6.53796	LOC_Os06g06950
Chr6_3302791	6	3302791	7.17509	LOC_Os06g06950
Chr6_3302629	6	3302629	6.29721	LOC_Os06g06950
Chr6_3302538	6	3302538	6.6886	LOC_Os06g06950
Chr6_3302531	6	3302531	6.68793	LOC_Os06g06950
Chr6_3302501	6	3302501	6.53306	LOC_Os06g06950
Chr6_3302280	6	3302280	5.95062	LOC_Os06g06950
Chr6_3302279	6	3302279	5.90379	LOC_Os06g06950
Chr6_3302222	6	3302222	6.76433	LOC_Os06g06950
Chr6_3302219	6	3302219	6.75664	LOC_Os06g06950
Chr6_3302194	6	3302194	6.16435	LOC_Os06g06950
Chr6_3302185	6	3302185	6.58577	LOC_Os06g06950
Chr6_3302179	6	3302179	6.54008	LOC_Os06g06950
Chr6_3302131	6	3302131	6.45383	LOC_Os06g06950
Chr6_3302038	6	3302038	6.89347	LOC_Os06g06950
Chr6_3301924	6	3301924	7.60376	LOC_Os06g06950
Chr6_3301922	6	3301922	7.40352	LOC_Os06g06950
Chr6_3301906	6	3301906	6.77966	LOC_Os06g06950
Chr6_3301855	6	3301855	5.89869	LOC_Os06g06950
Chr6_3301848	6	3301848	6.19831	LOC_Os06g06950
Chr6_3301573	6	3301573	7.25474	LOC_Os06g06950
Chr6_3301551	6	3301551	7.37499	LOC_Os06g06950
Chr6_3301544	6	3301544	7.20517	LOC_Os06g06950
Chr6_3301522	6	3301522	6.06016	LOC_Os06g06950
Chr6_3301513	6	3301513	6.45217	LOC_Os06g06950
Chr6_3301509	6	3301509	6.02474	LOC_Os06g06950
Chr6_3301418	6	3301418	7.31102	LOC_Os06g06950
Chr6_3301406	6	3301406	6.24378	LOC_Os06g06950
Chr6_3301110	6	3301110	6.68464
Chr6_3301109	6	3301109	6.439
Chr6_3298457	6	3298457	7.28075
Chr6_3298448	6	3298448	6.53425
Chr6_3298370	6	3298370	7.34659
Chr6_3298194	6	3298194	6.6284		LOC_Os06g06940
Chr6_3298141	6	3298141	8.42479		LOC_Os06g06940
Chr6_3298046	6	3298046	5.80419		LOC_Os06g06940
Chr6_3298018	6	3298018	5.71108		LOC_Os06g06940
Chr6_3297928	6	3297928	6.85465		LOC_Os06g06940
Chr6_3297913	6	3297913	7.77358		LOC_Os06g06940
Chr6_3297867	6	3297867	7.81125		LOC_Os06g06940
Chr6_3297846	6	3297846	7.67805		LOC_Os06g06940
Chr6_3297790	6	3297790	6.63643		LOC_Os06g06940
Chr6_3297739	6	3297739	6.21928		LOC_Os06g06940
Chr6_3297738	6	3297738	5.75414		LOC_Os06g06940
Chr6_3297731	6	3297731	5.93424		LOC_Os06g06940
Chr6_3297728	6	3297728	5.82813		LOC_Os06g06940
Chr6_3297715	6	3297715	6.11315		LOC_Os06g06940
Chr6_3297683	6	3297683	5.62477		LOC_Os06g06940
Chr6_3297678	6	3297678	6.09904		LOC_Os06g06940
Chr6_3297669	6	3297669	5.75757		LOC_Os06g06940
Chr6_3297668	6	3297668	5.8134		LOC_Os06g06940
Chr6_3297565	6	3297565	7.75414		LOC_Os06g06940
Chr6_3297562	6	3297562	7.43165		LOC_Os06g06940
Chr6_3297545	6	3297545	7.20348		LOC_Os06g06940
Chr6_3297534	6	3297534	6.93978		LOC_Os06g06940
Chr6_3297530	6	3297530	7.03816		LOC_Os06g06940
Chr6_3297505	6	3297505	7.2433		LOC_Os06g06940
Chr6_3297483	6	3297483	7.72941		LOC_Os06g06940
Chr6_3297476	6	3297476	7.03415		LOC_Os06g06940
Chr6_3297470	6	3297470	7.40942		LOC_Os06g06940
Chr6_3297466	6	3297466	8.00197		LOC_Os06g06940
Chr6_3297452	6	3297452	7.3952		LOC_Os06g06940
Chr6_3297419	6	3297419	8.56108		LOC_Os06g06940
Chr6_3297388	6	3297388	7.26155		LOC_Os06g06940
Chr6_3297360	6	3297360	6.9436		LOC_Os06g06940
Chr6_3297295	6	3297295	6.80449		LOC_Os06g06940
Chr6_3297290	6	3297290	6.82656		LOC_Os06g06940
Chr6_3297203	6	3297203	7.11504		LOC_Os06g06940
Chr6_3297147	6	3297147	7.30011		LOC_Os06g06940
Chr6_3297059	6	3297059	7.30046		LOC_Os06g06940
Chr6_3297039	6	3297039	5.9532		LOC_Os06g06940
Chr6_3297038	6	3297038	6.1888		LOC_Os06g06940
Chr6_3297034	6	3297034	6.29806		LOC_Os06g06940
Chr6_3296985	6	3296985	5.93582		LOC_Os06g06940
Chr6_3296984	6	3296984	6.78743		LOC_Os06g06940
Chr6_3296970	6	3296970	6.24723		LOC_Os06g06940
Chr6_3296930	6	3296930	8.7856		LOC_Os06g06940
Chr6_3296925	6	3296925	7.53503		LOC_Os06g06940
Chr6_3296923	6	3296923	7.03728		LOC_Os06g06940
Chr6_3296898	6	3296898	7.07459		LOC_Os06g06940
Chr6_3296753	6	3296753	6.75066		LOC_Os06g06940
Chr6_3296694	6	3296694	7.88556		LOC_Os06g06940
Chr6_3296627	6	3296627	6.20944		LOC_Os06g06940
Chr6_3296605	6	3296605	6.29864		LOC_Os06g06940
Chr6_3296477	6	3296477	6.90166		LOC_Os06g06940
Chr6_3296475	6	3296475	6.6274		LOC_Os06g06940
Chr6_3296466	6	3296466	12.5603		LOC_Os06g06940
Chr6_3296444	6	3296444	6.57399		LOC_Os06g06940
Chr6_3296426	6	3296426	6.61565		LOC_Os06g06940
Chr6_3296351	6	3296351	6.06124	LOC_Os06g06940
Chr6_3296349	6	3296349	6.06976	LOC_Os06g06940
Chr6_3296336	6	3296336	6.77189	LOC_Os06g06940
Chr6_3296235	6	3296235	6.73435	LOC_Os06g06940
Chr6_3296143	6	3296143	6.99259	LOC_Os06g06940
Chr6_3296126	6	3296126	7.24438	LOC_Os06g06940
Chr6_3296063	6	3296063	7.17	LOC_Os06g06940
Chr6_3295838	6	3295838	6.07317	LOC_Os06g06940
Chr6_3295723	6	3295723	6.88355	LOC_Os06g06940
Chr6_3295720	6	3295720	6.99472	LOC_Os06g06940
Chr6_3295707	6	3295707	7.28907	LOC_Os06g06940
Chr6_3295705	6	3295705	7.24668	LOC_Os06g06940
Chr6_3295685	6	3295685	6.83153	LOC_Os06g06940
Chr6_3289963	6	3289963	5.84746		LOC_Os06g06930
Chr6_3289864	6	3289864	5.61475		LOC_Os06g06930
Chr6_3086235	6	3086235	5.84068	LOC_Os06g06560
Chr11_2872064	11	2872064	6.49933
Chr6_2423063	6	2423063	5.92088
Chr6_2335088	6	2335088	7.63733
Chr6_2332983	6	2332983	9.97555	LOC_Os06g05190
Chr6_2266210	6	2266210	5.90611
Chr6_2215656	6	2215656	7.64427
Chr6_2187140	6	2187140	6.77223	LOC_Os06g04960
Chr6_2137058	6	2137058	6.43345		LOC_Os06g04870
Chr6_2117684	6	2117684	6.36325		LOC_Os06g04840
Chr6_1989861	6	1989861	8.53118		LOC_Os06g04580
Chr6_1988659	6	1988659	7.18204		LOC_Os06g04580
Chr6_1961713	6	1961713	7.05265
Chr6_1961497	6	1961497	6.61564
Chr6_1960905	6	1960905	6.80483
Chr6_1960427	6	1960427	6.88605
Chr6_1960306	6	1960306	6.82376
Chr6_1960271	6	1960271	11.3465
Chr6_1960248	6	1960248	6.78185
Chr6_1960226	6	1960226	7.19649
Chr6_1960204	6	1960204	8.96343
Chr6_1960197	6	1960197	7.01996
Chr6_1960186	6	1960186	9.0833
Chr6_1960160	6	1960160	6.89168
Chr6_1960151	6	1960151	8.78314
Chr6_1960100	6	1960100	6.73574
Chr6_1959974	6	1959974	7.32924
Chr6_1959972	6	1959972	8.48758
Chr6_1959949	6	1959949	9.07547
Chr6_1959847	6	1959847	6.98941
Chr6_1958516	6	1958516	8.07048
Chr6_1958494	6	1958494	8.82018
Chr6_1958441	6	1958441	5.77034
Chr6_1958424	6	1958424	6.6144
Chr6_1958415	6	1958415	10.7464
Chr6_1958412	6	1958412	10.9576
Chr6_1958362	6	1958362	12.1512
Chr6_1958349	6	1958349	9.21124
Chr6_1958262	6	1958262	11.0145
Chr6_1958226	6	1958226	11.0596
Chr6_1958087	6	1958087	10.3697
Chr6_1957702	6	1957702	7.69243
Chr6_1957669	6	1957669	9.14202
Chr6_1957665	6	1957665	8.40942
Chr6_1957393	6	1957393	9.26608
Chr6_1957388	6	1957388	8.33663
Chr6_1957335	6	1957335	7.5785
Chr6_1957319	6	1957319	12.4266
Chr6_1957299	6	1957299	8.37462
Chr6_1957292	6	1957292	8.02319
Chr6_1957283	6	1957283	8.12315
Chr6_1957273	6	1957273	9.0243
Chr6_1957237	6	1957237	7.33473
Chr6_1957219	6	1957219	7.29037
Chr6_1957215	6	1957215	7.51072
Chr6_1957107	6	1957107	10.3526
Chr6_1956922	6	1956922	11.2138
Chr6_1956887	6	1956887	8.06998
Chr6_1956805	6	1956805	11.2081
Chr6_1956430	6	1956430	10.9037
Chr6_1956354	6	1956354	11.0348
Chr6_1956350	6	1956350	9.1613
Chr6_1956335	6	1956335	8.8749
Chr6_1956314	6	1956314	11.9374
Chr6_1954773	6	1954773	6.55441
Chr6_1954571	6	1954571	10.4457
Chr6_1954390	6	1954390	10.5673
Chr6_1953503	6	1953503	10.3471
Chr6_1949672	6	1949672	6.47287	LOC_Os06g04530
Chr6_1936661	6	1936661	11.4744		LOC_Os06g04510
Chr6_1936302	6	1936302	11.2832	LOC_Os06g04510	LOC_Os06g04520
Chr6_1936172	6	1936172	8.07056	LOC_Os06g04510	LOC_Os06g04520
Chr6_1935998	6	1935998	11.0923	LOC_Os06g04510	LOC_Os06g04520
Chr6_1935961	6	1935961	8.02562	LOC_Os06g04510	LOC_Os06g04520
Chr6_1935849	6	1935849	6.47615	LOC_Os06g04510
Chr6_1935482	6	1935482	7.94527	LOC_Os06g04510
Chr6_1935457	6	1935457	13.1964	LOC_Os06g04510
Chr6_1935273	6	1935273	13.7451	LOC_Os06g04510
Chr6_1935197	6	1935197	7.94354	LOC_Os06g04510
Chr6_1935077	6	1935077	5.79649	LOC_Os06g04510
Chr6_1934415	6	1934415	15.0515	LOC_Os06g04510
Chr6_1934345	6	1934345	13.5515	LOC_Os06g04510
Chr6_1934338	6	1934338	12.7885	LOC_Os06g04510
Chr6_1934335	6	1934335	13.4308	LOC_Os06g04510
Chr6_1934313	6	1934313	14.3111	LOC_Os06g04510
Chr6_1934250	6	1934250	14.6122	LOC_Os06g04510
Chr6_1934144	6	1934144	13.2353	LOC_Os06g04510
Chr6_1933971	6	1933971	14.7241	LOC_Os06g04510
Chr6_1933775	6	1933775	14.8754	LOC_Os06g04510
Chr6_1933666	6	1933666	14.0151	LOC_Os06g04510
Chr6_1933586	6	1933586	14.1484	LOC_Os06g04510
Chr6_1933538	6	1933538	8.30056	LOC_Os06g04510
Chr6_1933523	6	1933523	13.8474	LOC_Os06g04510
Chr6_1933377	6	1933377	8.07936	LOC_Os06g04510
Chr6_1933006	6	1933006	13.9172	LOC_Os06g04510
Chr6_1932485	6	1932485	8.07998	LOC_Os06g04510
Chr6_1932003	6	1932003	14.1285	LOC_Os06g04510
Chr6_1931797	6	1931797	14.0408	LOC_Os06g04510
Chr6_1931411	6	1931411	7.98912	LOC_Os06g04510
Chr6_1931238	6	1931238	8.00212
Chr6_1931236	6	1931236	10
Chr6_1931228	6	1931228	14.1484
Chr6_1931185	6	1931185	14.5074
Chr6_1931062	6	1931062	7.89147
Chr6_1930880	6	1930880	14.6758	LOC_Os06g04500
Chr6_1930653	6	1930653	7.97305	LOC_Os06g04500
Chr6_1930558	6	1930558	11.9337	LOC_Os06g04500
Chr6_1930454	6	1930454	8.05654	LOC_Os06g04500
Chr6_1930441	6	1930441	14.1157	LOC_Os06g04500
Chr6_1930281	6	1930281	14.3418	LOC_Os06g04500
Chr6_1930100	6	1930100	7.988	LOC_Os06g04500
Chr6_1929657	6	1929657	14.1837	LOC_Os06g04500
Chr6_1929548	6	1929548	12.8809	LOC_Os06g04500
Chr6_1929041	6	1929041	13.7785	LOC_Os06g04500
Chr6_1928989	6	1928989	13.9418	LOC_Os06g04500
Chr6_1928986	6	1928986	8.14305	LOC_Os06g04500
Chr6_1928958	6	1928958	8.1063	LOC_Os06g04500
Chr6_1928813	6	1928813	12.6363	LOC_Os06g04500
Chr6_1928771	6	1928771	7.88791	LOC_Os06g04500
Chr6_1928767	6	1928767	14.2644	LOC_Os06g04500
Chr6_1928647	6	1928647	12.9058	LOC_Os06g04500
Chr6_1928564	6	1928564	12.492	LOC_Os06g04500
Chr6_1928553	6	1928553	7.98979	LOC_Os06g04500
Chr6_1928311	6	1928311	13.7216	LOC_Os06g04500
Chr6_1927958	6	1927958	11.7006	LOC_Os06g04500
Chr6_1927658	6	1927658	8.02421	LOC_Os06g04500	LOC_Os06g04500
Chr6_1927300	6	1927300	11.0365	LOC_Os06g04500	LOC_Os06g04500
Chr6_1927244	6	1927244	11.1484		LOC_Os06g04500
Chr6_1927201	6	1927201	10.7299		LOC_Os06g04500
Chr6_1927194	6	1927194	12.4482		LOC_Os06g04500
Chr6_1927188	6	1927188	12.2735		LOC_Os06g04500
Chr6_1925829	6	1925829	11.0533		LOC_Os06g04500
Chr6_1925789	6	1925789	12.3591		LOC_Os06g04500
Chr6_1925773	6	1925773	12.8504		LOC_Os06g04500
Chr6_1925733	6	1925733	9.56455		LOC_Os06g04500
Chr6_1925707	6	1925707	7.61395		LOC_Os06g04500
Chr6_1925597	6	1925597	12.0843		LOC_Os06g04500
Chr6_1925585	6	1925585	12.2433		LOC_Os06g04500
Chr6_1925573	6	1925573	12.5645		LOC_Os06g04500
Chr6_1925495	6	1925495	11.8595		LOC_Os06g04500
Chr6_1925486	6	1925486	12.3294		LOC_Os06g04500
Chr6_1925478	6	1925478	12.5309		LOC_Os06g04500
Chr6_1925474	6	1925474	12.3169		LOC_Os06g04500
Chr6_1925470	6	1925470	7.88189		LOC_Os06g04500
Chr6_1925465	6	1925465	11.8628		LOC_Os06g04500
Chr6_1925464	6	1925464	11.9079		LOC_Os06g04500
Chr6_1925412	6	1925412	11.3812		LOC_Os06g04500
Chr6_1925402	6	1925402	11.7036		LOC_Os06g04500
Chr6_1925388	6	1925388	9.54181		LOC_Os06g04500
Chr6_1925298	6	1925298	9.8724	LOC_Os06g04490	LOC_Os06g04500
Chr6_1925269	6	1925269	5.73279	LOC_Os06g04490	LOC_Os06g04500
Chr6_1925248	6	1925248	13.1052	LOC_Os06g04490
Chr6_1925145	6	1925145	12.4953	LOC_Os06g04490
Chr6_1925134	6	1925134	12.0704	LOC_Os06g04490
Chr6_1925130	6	1925130	12.5176	LOC_Os06g04490
Chr6_1925124	6	1925124	12.4731	LOC_Os06g04490
Chr6_1924963	6	1924963	13.0313	LOC_Os06g04490
Chr6_1924935	6	1924935	12.8051	LOC_Os06g04490
Chr6_1924884	6	1924884	12.9228	LOC_Os06g04490
Chr6_1924842	6	1924842	11.5797		LOC_Os06g04490
Chr6_1924805	6	1924805	10.1977		LOC_Os06g04490
Chr6_1924804	6	1924804	11.0471		LOC_Os06g04490
Chr6_1924753	6	1924753	12.3475		LOC_Os06g04490
Chr6_1924739	6	1924739	13.2909		LOC_Os06g04490
Chr6_1924704	6	1924704	10.8215		LOC_Os06g04490
Chr6_1924682	6	1924682	12.0226		LOC_Os06g04490
Chr6_1924655	6	1924655	12.6926		LOC_Os06g04490
Chr6_1924647	6	1924647	12.5919		LOC_Os06g04490
Chr6_1924645	6	1924645	12.7529		LOC_Os06g04490
Chr6_1924548	6	1924548	12.2614		LOC_Os06g04490
Chr6_1924514	6	1924514	9.64896		LOC_Os06g04490
Chr6_1924512	6	1924512	9.38846		LOC_Os06g04490
Chr6_1924511	6	1924511	9.60401		LOC_Os06g04490
Chr6_1924504	6	1924504	8.73195		LOC_Os06g04490
Chr6_1924500	6	1924500	7.9086		LOC_Os06g04490
Chr6_1924499	6	1924499	7.89756		LOC_Os06g04490
Chr6_1924496	6	1924496	8.21187		LOC_Os06g04490
Chr6_1924489	6	1924489	5.6754		LOC_Os06g04490
Chr6_1924472	6	1924472	5.82733		LOC_Os06g04490
Chr6_1924441	6	1924441	8.98675		LOC_Os06g04490
Chr6_1924428	6	1924428	10.7164		LOC_Os06g04490
Chr6_1924412	6	1924412	5.60959		LOC_Os06g04490
Chr6_1924368	6	1924368	5.80752		LOC_Os06g04490
Chr6_1924311	6	1924311	5.62156		LOC_Os06g04490
Chr6_1924300	6	1924300	7.08092		LOC_Os06g04490
Chr6_1924294	6	1924294	7.88078		LOC_Os06g04490
Chr6_1924284	6	1924284	8.74724		LOC_Os06g04490
Chr6_1924271	6	1924271	9.57588		LOC_Os06g04490
Chr6_1924261	6	1924261	8.31156		LOC_Os06g04490
Chr6_1924256	6	1924256	8.61742		LOC_Os06g04490
Chr6_1924249	6	1924249	8.35933		LOC_Os06g04490
Chr6_1924231	6	1924231	9.89091		LOC_Os06g04490
Chr6_1924217	6	1924217	9.78626		LOC_Os06g04490
Chr6_1924212	6	1924212	9.83235		LOC_Os06g04490
Chr6_1924202	6	1924202	8.41535		LOC_Os06g04490
Chr6_1924191	6	1924191	5.77172		LOC_Os06g04490
Chr6_1923393	6	1923393	7.69588	LOC_Os06g04480	LOC_Os06g04490
Chr6_1923367	6	1923367	10.7739	LOC_Os06g04480	LOC_Os06g04490
Chr6_1923335	6	1923335	10.7247	LOC_Os06g04480	LOC_Os06g04490
Chr6_1923320	6	1923320	10.6036	LOC_Os06g04480	LOC_Os06g04490
Chr6_1923071	6	1923071	6.19594	LOC_Os06g04480	LOC_Os06g04490
Chr6_1923053	6	1923053	6.21842	LOC_Os06g04480	LOC_Os06g04490
Chr6_1923047	6	1923047	6.4204	LOC_Os06g04480	LOC_Os06g04490
Chr6_1922806	6	1922806	7.10642	LOC_Os06g04480
Chr6_1922686	6	1922686	9.66228	LOC_Os06g04480
Chr6_1922677	6	1922677	9.72771	LOC_Os06g04480
Chr6_1922663	6	1922663	10.3404	LOC_Os06g04480
Chr6_1922504	6	1922504	9.00414	LOC_Os06g04480
Chr6_1922439	6	1922439	7.08501	LOC_Os06g04480
Chr6_1922371	6	1922371	7.91775		LOC_Os06g04480
Chr6_1922350	6	1922350	8.13669		LOC_Os06g04480
Chr6_1922323	6	1922323	10.8234		LOC_Os06g04480
Chr6_1922306	6	1922306	12.715		LOC_Os06g04480
Chr6_1922207	6	1922207	10.9689		LOC_Os06g04480
Chr6_1922178	6	1922178	9.42316		LOC_Os06g04480
Chr6_1922149	6	1922149	8.4055		LOC_Os06g04480
Chr6_1922146	6	1922146	7.6169		LOC_Os06g04480
Chr6_1922086	6	1922086	7.46366		LOC_Os06g04480
Chr6_1922043	6	1922043	6.66802		LOC_Os06g04480
Chr6_1922015	6	1922015	5.99382		LOC_Os06g04480
Chr6_1922014	6	1922014	6.37629		LOC_Os06g04480
Chr6_1922007	6	1922007	8.25417		LOC_Os06g04480
Chr6_1921577	6	1921577	5.62006		LOC_Os06g04480
Chr6_1921575	6	1921575	5.70381		LOC_Os06g04480
Chr6_1921469	6	1921469	8.17084		LOC_Os06g04480
Chr6_1921463	6	1921463	7.41218		LOC_Os06g04480
Chr6_1920307	6	1920307	6.96421
Chr6_1920305	6	1920305	6.36164
Chr6_1920300	6	1920300	7.75378
Chr6_1920287	6	1920287	6.01121
Chr6_1920219	6	1920219	6.82167
Chr6_1920212	6	1920212	9.60713
Chr6_1920202	6	1920202	10.3282
Chr6_1920194	6	1920194	10.3556
Chr6_1920190	6	1920190	10.1711
Chr6_1920172	6	1920172	11.8929
Chr6_1920142	6	1920142	12.4527
Chr6_1920138	6	1920138	6.80837
Chr6_1920124	6	1920124	10.4619
Chr6_1920123	6	1920123	10.7307
Chr6_1920115	6	1920115	10.3472
Chr6_1920098	6	1920098	7.06314
Chr6_1920087	6	1920087	5.85046
Chr6_1920049	6	1920049	10.1432		LOC_Os06g04470
Chr6_1920003	6	1920003	12.1109		LOC_Os06g04470
Chr6_1919914	6	1919914	13.3876		LOC_Os06g04470
Chr6_1919902	6	1919902	7.49821		LOC_Os06g04470
Chr6_1919893	6	1919893	13.7756		LOC_Os06g04470
Chr6_1919878	6	1919878	13.7371		LOC_Os06g04470
Chr6_1919872	6	1919872	13.6898		LOC_Os06g04470
Chr6_1919857	6	1919857	12.7247		LOC_Os06g04470
Chr6_1919853	6	1919853	12.3976		LOC_Os06g04470
Chr6_1919851	6	1919851	12.1891		LOC_Os06g04470
Chr6_1919850	6	1919850	12.1568		LOC_Os06g04470
Chr6_1919828	6	1919828	13.0692		LOC_Os06g04470
Chr6_1919820	6	1919820	13.219		LOC_Os06g04470
Chr6_1919754	6	1919754	13.2644		LOC_Os06g04470
Chr6_1919723	6	1919723	13.2287		LOC_Os06g04470
Chr6_1919722	6	1919722	13.2539		LOC_Os06g04470
Chr6_1919685	6	1919685	12.0378		LOC_Os06g04470
Chr6_1919649	6	1919649	13.4427		LOC_Os06g04470
Chr6_1918828	6	1918828	7.90454		LOC_Os06g04470
Chr6_1918806	6	1918806	9.89532		LOC_Os06g04470
Chr6_1918721	6	1918721	6.40206		LOC_Os06g04470
Chr6_1918619	6	1918619	14.0738		LOC_Os06g04470
Chr6_1918414	6	1918414	14.0408		LOC_Os06g04470
Chr6_1918407	6	1918407	13.8901		LOC_Os06g04470
Chr6_1916789	6	1916789	7.52707	LOC_Os06g04470
Chr6_1915530	6	1915530	6.23312	LOC_Os06g04470
Chr6_1915529	6	1915529	6.22128	LOC_Os06g04470
Chr6_1913418	6	1913418	5.78897		LOC_Os06g04460
Chr6_1909552	6	1909552	14.4632		LOC_Os06g04450
Chr6_1909402	6	1909402	7.62867		LOC_Os06g04450
Chr6_1906974	6	1906974	7.78567	LOC_Os06g04450
Chr6_1903456	6	1903456	7.45612	LOC_Os06g04450
Chr6_1901974	6	1901974	14.2644	LOC_Os06g04450
Chr6_1900772	6	1900772	7.8758
Chr6_1900745	6	1900745	14.6324
[truncated: 1,340 more rows]

## Sheet: Indica
Supplementary Table 2: Summary of SNPs associated significantly with glutinous detected in indica by GWAS mapping
SNP	Chromosome	Position	-LOG10(P)	Gene with signal in ORF	Gene with signal in promoter
Chr1_10820147	1	10820147	5.52578	LOC_Os01g19160	LOC_Os01g19140
Chr1_10893897	1	10893897	7.28567		LOC_Os01g19270
Chr1_10931612	1	10931612	7.71444		LOC_Os01g19320
Chr1_30603445	1	30603445	5.59007		LOC_Os01g53255
Chr1_33073063	1	33073063	5.66756
Chr1_33458103	1	33458103	6.57675	LOC_Os01g57854
Chr1_4833070	1	4833070	8.95468
Chr1_4833721	1	4833721	10.2636
Chr1_4851195	1	4851195	7.10624	LOC_Os01g09500	LOC_Os01g09510
Chr1_4855407	1	4855407	5.70115		LOC_Os01g09520
Chr1_4855413	1	4855413	5.55284		LOC_Os01g09520
Chr1_4855577	1	4855577	7.1549		LOC_Os01g09520
Chr1_4868857	1	4868857	10.3242		LOC_Os01g09530
Chr1_4871230	1	4871230	7.19314
Chr1_4916377	1	4916377	7.76955
Chr1_4991874	1	4991874	5.6968	LOC_Os01g09690
Chr10_10196272	10	10196272	6.34679
Chr10_10196610	10	10196610	5.56067
Chr10_10197973	10	10197973	6.95078	LOC_Os10g20280
Chr10_10197974	10	10197974	5.72816	LOC_Os10g20280
Chr10_11646391	10	11646391	8.87615
Chr10_11650959	10	11650959	6.61798	LOC_Os10g22484
Chr10_11653386	10	11653386	5.64589	LOC_Os10g22484
Chr10_11655002	10	11655002	6.38934	LOC_Os10g22484
Chr10_11656346	10	11656346	7.10679	LOC_Os10g22484
Chr10_11658272	10	11658272	6.36051	LOC_Os10g22484
Chr10_11658368	10	11658368	7.13906	LOC_Os10g22484
Chr10_11658438	10	11658438	6.24565	LOC_Os10g22484
Chr10_11658687	10	11658687	5.87615	LOC_Os10g22484
Chr10_11661339	10	11661339	6.05899		LOC_Os10g22510
Chr10_11661358	10	11661358	6.16115		LOC_Os10g22510
Chr10_11662174	10	11662174	6.13549		LOC_Os10g22510
Chr10_11664836	10	11664836	5.54363	LOC_Os10g22510
Chr10_17403718	10	17403718	8.284
Chr11_16667887	11	16667887	5.60555
Chr11_23262188	11	23262188	5.72584	LOC_Os11g39079	LOC_Os11g39090
Chr11_2774968	11	2774968	10.5045	LOC_Os11g05900
Chr11_2785540	11	2785540	6.90658		LOC_Os11g05920
Chr11_2825175	11	2825175	13.52
Chr11_2872064	11	2872064	6.59176
Chr2_21893035	2	21893035	5.73755	LOC_Os02g36264
Chr2_24111760	2	24111760	6.5784	LOC_Os02g39900
Chr2_7363995	2	7363995	5.61261		LOC_Os02g13710
Chr2_7369542	2	7369542	6.13018
Chr2_7392214	2	7392214	6.46597
Chr2_7395607	2	7395607	5.67162		LOC_Os02g13740
Chr2_7523325	2	7523325	5.63264
Chr2_7540769	2	7540769	5.93181		LOC_Os02g13890
Chr3_12777951	3	12777951	6.56703	LOC_Os03g22300
Chr3_17072527	3	17072527	5.65956
Chr3_17072945	3	17072945	6.3536
Chr3_17073950	3	17073950	5.83565
Chr3_17089753	3	17089753	5.5391
Chr3_17089970	3	17089970	5.68613
Chr3_17099439	3	17099439	5.50169
Chr3_17102578	3	17102578	6.36151
Chr3_17114732	3	17114732	6.43297		LOC_Os03g30000
Chr3_17117693	3	17117693	5.68825
Chr3_17117860	3	17117860	5.76447
Chr3_17117879	3	17117879	5.89963
Chr3_17118164	3	17118164	5.70997
Chr3_17119285	3	17119285	5.6073
Chr3_17119645	3	17119645	6.32148	LOC_Os03g30010
Chr3_17120181	3	17120181	5.67985	LOC_Os03g30010
Chr3_17120246	3	17120246	5.69037	LOC_Os03g30010
Chr3_17120669	3	17120669	6.19111	LOC_Os03g30010
Chr3_17121255	3	17121255	5.63451	LOC_Os03g30010
Chr3_17121464	3	17121464	6.53462		LOC_Os03g30010
Chr3_17121989	3	17121989	6.31336		LOC_Os03g30010
Chr3_17122269	3	17122269	6.26122		LOC_Os03g30010
Chr3_17122768	3	17122768	6.73993		LOC_Os03g30010
Chr3_17122769	3	17122769	5.98716		LOC_Os03g30010
Chr3_17123460	3	17123460	6.01909
Chr3_17123994	3	17123994	7.19586
Chr3_17125143	3	17125143	6.29158		LOC_Os03g30020
Chr3_17125450	3	17125450	5.74715		LOC_Os03g30020
Chr3_17125676	3	17125676	6.25026		LOC_Os03g30020
Chr3_17126546	3	17126546	6.0511	LOC_Os03g30020
Chr3_17126617	3	17126617	5.87615	LOC_Os03g30020
Chr3_17126714	3	17126714	5.81248	LOC_Os03g30020
Chr3_17129792	3	17129792	6.04431
Chr3_17131537	3	17131537	5.71444
Chr3_17131745	3	17131745	5.50724
Chr3_17132347	3	17132347	5.54363
Chr3_17132378	3	17132378	6.00612
Chr3_17132380	3	17132380	5.97469
Chr3_17133332	3	17133332	5.86646
Chr3_17133713	3	17133713	5.95468
Chr3_17133786	3	17133786	8.24185
Chr3_17134109	3	17134109	5.92812
Chr3_17136528	3	17136528	6.02		LOC_Os03g30030
Chr3_17137680	3	17137680	6.55284		LOC_Os03g30030
Chr3_17137693	3	17137693	5.64016		LOC_Os03g30030
Chr3_17138513	3	17138513	5.82974	LOC_Os03g30040
Chr3_17139986	3	17139986	6.65365		LOC_Os03g30040
Chr3_17140360	3	17140360	5.70774		LOC_Os03g30040
Chr3_17140644	3	17140644	5.80134		LOC_Os03g30050
Chr3_17141904	3	17141904	5.51004
Chr3_17141907	3	17141907	5.58004
Chr3_17141918	3	17141918	5.9431
Chr3_17142029	3	17142029	5.64016
Chr3_17142044	3	17142044	5.59517
Chr3_17142148	3	17142148	6.14752
Chr3_17142162	3	17142162	5.95468
Chr3_17142185	3	17142185	6.05998
Chr3_17143522	3	17143522	5.53611	LOC_Os03g30060
Chr3_17143774	3	17143774	5.75449	LOC_Os03g30060
Chr3_17144044	3	17144044	5.62525	LOC_Os03g30060
Chr3_17146185	3	17146185	5.60033		LOC_Os03g30060
Chr3_17173405	3	17173405	5.91364	LOC_Os03g30092
Chr3_17184458	3	17184458	7.07676	LOC_Os03g30110
Chr3_17184502	3	17184502	6.19246	LOC_Os03g30110
Chr3_17184510	3	17184510	6.73993	LOC_Os03g30110
Chr3_17213658	3	17213658	5.58503	LOC_Os03g30150
Chr3_17248096	3	17248096	5.92812		LOC_Os03g30220
Chr3_17256950	3	17256950	6.41117
Chr3_17256955	3	17256955	5.59688
Chr3_17313530	3	17313530	6.46471	LOC_Os03g30360
Chr3_17363584	3	17363584	5.77728
Chr3_17363919	3	17363919	5.62342
Chr3_17364302	3	17364302	7.5157	LOC_Os03g30450
Chr3_17364343	3	17364343	6.49485	LOC_Os03g30450
Chr3_17364670	3	17364670	7.30016	LOC_Os03g30450
Chr3_17365385	3	17365385	5.82974	LOC_Os03g30450
Chr3_17366901	3	17366901	6.19246	LOC_Os03g30450
Chr3_17367356	3	17367356	6.08619	LOC_Os03g30450
Chr3_17375169	3	17375169	6.8041
Chr3_17375178	3	17375178	5.92082
Chr3_17375432	3	17375432	5.97062
Chr3_22607457	3	22607457	5.95468
Chr3_25365932	3	25365932	7.04866	LOC_Os03g44930
Chr3_25620958	3	25620958	6.26122
Chr3_25659693	3	25659693	5.91009
Chr3_25887180	3	25887180	7.38405
Chr3_29122801	3	29122801	5.70115
Chr3_33562092	3	33562092	6.08725		LOC_Os03g58940
Chr3_35647554	3	35647554	5.50585		LOC_Os03g63040
Chr3_3656445	3	3656445	5.55284	LOC_Os03g07140
Chr3_4968399	3	4968399	5.70115		LOC_Os03g09950
Chr3_5585837	3	5585837	5.57349		LOC_Os03g10870
Chr3_5662172	3	5662172	5.64397
Chr3_5704078	3	5704078	6.34486
Chr3_5738221	3	5738221	5.9914	LOC_Os03g11140
Chr3_5738308	3	5738308	6.2636	LOC_Os03g11140
Chr4_21954104	4	21954104	5.61798
Chr4_22011918	4	22011918	6.24565	LOC_Os04g36054
Chr4_22018002	4	22018002	7.44491	LOC_Os04g36062
Chr4_22018048	4	22018048	5.61439	LOC_Os04g36062
Chr4_22019518	4	22019518	6.01863	LOC_Os04g36062
Chr4_22024426	4	22024426	6.08197	LOC_Os04g36062
Chr4_22028017	4	22028017	7.42713		LOC_Os04g36070
Chr4_22028146	4	22028146	5.60033		LOC_Os04g36070
Chr4_22029296	4	22029296	6.0348		LOC_Os04g36070
Chr4_22029719	4	22029719	6.06854
Chr4_22036453	4	22036453	5.68825
Chr4_27533835	4	27533835	5.94692
Chr4_27731253	4	27731253	5.6517		LOC_Os04g46780
Chr4_27982357	4	27982357	7.9914		LOC_Os04g47110
Chr4_27982652	4	27982652	7.85699		LOC_Os04g47110
Chr4_27983560	4	27983560	8.19518		LOC_Os04g47110
Chr4_27983663	4	27983663	8.97469		LOC_Os04g47110
Chr4_27983716	4	27983716	8.9914		LOC_Os04g47110
Chr4_27983722	4	27983722	8.91364		LOC_Os04g47110
Chr4_27984039	4	27984039	7.82102		LOC_Os04g47110
Chr4_27984118	4	27984118	8.33348	LOC_Os04g47120
Chr4_27984787	4	27984787	8.97881	LOC_Os04g47120
Chr4_27985544	4	27985544	8.64782	LOC_Os04g47120
Chr4_27986021	4	27986021	9.40782	LOC_Os04g47120
Chr4_27987393	4	27987393	9.5376	LOC_Os04g47120
Chr4_27987440	4	27987440	10.9172	LOC_Os04g47120
Chr4_27988771	4	27988771	9.87943	LOC_Os04g47120
Chr4_27989566	4	27989566	8.87615	LOC_Os04g47120
Chr4_27990822	4	27990822	9.43415
Chr4_27990870	4	27990870	9.47366	LOC_Os04g47130
Chr4_27991834	4	27991834	8.50446	LOC_Os04g47130
Chr4_27992137	4	27992137	8.28067	LOC_Os04g47130
Chr4_27992334	4	27992334	5.57349	LOC_Os04g47130
Chr4_27992527	4	27992527	9.43063		LOC_Os04g47130
Chr4_27992714	4	27992714	8.56864	LOC_Os04g47140	LOC_Os04g47130
Chr4_27992804	4	27992804	9.76447	LOC_Os04g47140	LOC_Os04g47130
Chr4_27992851	4	27992851	8.32698	LOC_Os04g47140	LOC_Os04g47130
Chr4_27992933	4	27992933	6.21325	LOC_Os04g47140	LOC_Os04g47130
Chr4_27993006	4	27993006	8.24642	LOC_Os04g47140	LOC_Os04g47130
Chr4_27993051	4	27993051	10.1818	LOC_Os04g47140	LOC_Os04g47130
Chr4_27993076	4	27993076	9.66154	LOC_Os04g47140	LOC_Os04g47130
Chr4_27993170	4	27993170	10.2652	LOC_Os04g47140	LOC_Os04g47130
Chr4_27993205	4	27993205	9.4318	LOC_Os04g47140	LOC_Os04g47130
Chr4_27993380	4	27993380	8.2668	LOC_Os04g47140	LOC_Os04g47130
Chr4_27993566	4	27993566	5.82391	LOC_Os04g47140	LOC_Os04g47130
Chr4_27993818	4	27993818	9.14509	LOC_Os04g47140	LOC_Os04g47130
Chr4_27993834	4	27993834	8.71444	LOC_Os04g47140	LOC_Os04g47130
Chr4_27994025	4	27994025	9.28651	LOC_Os04g47140	LOC_Os04g47130
Chr4_27994195	4	27994195	9.73049	LOC_Os04g47140	LOC_Os04g47130
Chr4_27994292	4	27994292	9.75449	LOC_Os04g47140	LOC_Os04g47130
Chr4_27994534	4	27994534	9.27901	LOC_Os04g47140
Chr4_27994953	4	27994953	8.12033	LOC_Os04g47140
Chr4_27994980	4	27994980	5.5544	LOC_Os04g47140
Chr4_27995006	4	27995006	6.52578	LOC_Os04g47140
Chr4_27995009	4	27995009	6.6968	LOC_Os04g47140
Chr4_27995018	4	27995018	7.02091	LOC_Os04g47140
Chr4_27996256	4	27996256	8.65365		LOC_Os04g47140
Chr4_27996435	4	27996435	7.75449		LOC_Os04g47140
Chr4_27999007	4	27999007	9.24185	LOC_Os04g47150
Chr4_27999079	4	27999079	9.75449	LOC_Os04g47150
Chr4_27999810	4	27999810	8.41908	LOC_Os04g47150
Chr4_28000448	4	28000448	6.87943
Chr4_28000499	4	28000499	8.77211
Chr4_28000511	4	28000511	8.62342
Chr4_28000741	4	28000741	8.92082
Chr4_28001355	4	28001355	7.26922
Chr4_28001400	4	28001400	5.70333
Chr4_28001401	4	28001401	5.96658
Chr4_28001575	4	28001575	5.91364
Chr4_28002616	4	28002616	7.24949	LOC_Os04g47160
Chr4_28004219	4	28004219	8.45469		LOC_Os04g47160
Chr4_28004284	4	28004284	5.78516		LOC_Os04g47160
Chr4_28004335	4	28004335	7.04818		LOC_Os04g47160
Chr4_28004403	4	28004403	7.09259		LOC_Os04g47160
Chr4_28004583	4	28004583	8.65561		LOC_Os04g47160
Chr4_28004712	4	28004712	6.9431		LOC_Os04g47160
Chr4_28004942	4	28004942	7.30892		LOC_Os04g47160
Chr4_28005335	4	28005335	6.15677		LOC_Os04g47160
Chr4_28005347	4	28005347	6.10292		LOC_Os04g47160
Chr4_28005356	4	28005356	8.14997		LOC_Os04g47160
Chr4_28005360	4	28005360	8.10568		LOC_Os04g47160
Chr4_28005368	4	28005368	7.98716		LOC_Os04g47160
Chr4_28005434	4	28005434	5.60906		LOC_Os04g47160
Chr4_28005457	4	28005457	8.50307		LOC_Os04g47160
Chr4_28005925	4	28005925	9.17849
Chr4_28006270	4	28006270	6.95078
Chr4_28007780	4	28007780	6.13668
Chr4_28007905	4	28007905	7.91364
Chr4_28008057	4	28008057	10.5287
Chr4_28008511	4	28008511	7.25181
Chr4_28008641	4	28008641	7.56225
Chr4_28008650	4	28008650	7.05601
Chr4_28008703	4	28008703	5.55596
Chr4_28008801	4	28008801	7.66354
Chr4_28009232	4	28009232	7.32422
Chr4_28009377	4	28009377	10.1726
Chr4_28009789	4	28009789	8.47625
Chr4_28009799	4	28009799	7.09151
Chr4_28009868	4	28009868	9.05306
Chr4_28010009	4	28010009	9.82681
Chr4_28010540	4	28010540	10.0367
Chr4_28010700	4	28010700	7.92812
Chr4_28010839	4	28010839	8.48017
Chr4_28010867	4	28010867	8.03245
Chr4_28010948	4	28010948	8.51286
Chr4_28011025	4	28011025	7.45346
Chr4_28011037	4	28011037	7.66756
Chr4_28011062	4	28011062	5.87615
Chr4_28011249	4	28011249	8.71897
Chr4_28012028	4	28012028	7.97469		LOC_Os04g47170
Chr4_28012305	4	28012305	6.04479		LOC_Os04g47170
Chr4_28012992	4	28012992	7.93181		LOC_Os04g47170
Chr4_28013025	4	28013025	6.31785		LOC_Os04g47170
Chr4_28013029	4	28013029	5.73283		LOC_Os04g47170
Chr4_28013078	4	28013078	6.43533		LOC_Os04g47170
Chr4_28013180	4	28013180	7.89279		LOC_Os04g47170
Chr4_28014734	4	28014734	8.79317	LOC_Os04g47170
Chr4_28014925	4	28014925	6.97469	LOC_Os04g47170
Chr4_28015532	4	28015532	7.35754	LOC_Os04g47170
Chr4_28018207	4	28018207	8.27737	LOC_Os04g47180
Chr4_28018274	4	28018274	7.21824	LOC_Os04g47180
Chr4_28020799	4	28020799	8.266	LOC_Os04g47180
Chr4_28022126	4	28022126	6.43652		LOC_Os04g47180
Chr4_28022241	4	28022241	8.26281		LOC_Os04g47180
Chr4_28022586	4	28022586	7.93181		LOC_Os04g47180
Chr4_28022713	4	28022713	7.62709		LOC_Os04g47180
Chr4_28022772	4	28022772	7.32331		LOC_Os04g47180
Chr4_28022778	4	28022778	6.07007		LOC_Os04g47180
Chr4_28022986	4	28022986	6.767		LOC_Os04g47180
Chr4_28024337	4	28024337	9.4698
Chr4_28025073	4	28025073	8.45223
Chr4_28025287	4	28025287	6.57675
Chr4_28025568	4	28025568	7.95078
Chr4_28025625	4	28025625	8.01412
Chr4_28025673	4	28025673	7.96658
Chr4_28025678	4	28025678	8.74232
Chr4_28025700	4	28025700	9.45842
Chr4_28025729	4	28025729	9.42713
Chr4_28026507	4	28026507	8.86012	LOC_Os04g47190
Chr4_28026929	4	28026929	8.74958	LOC_Os04g47190
Chr4_28027144	4	28027144	11.2487	LOC_Os04g47190
Chr4_28028067	4	28028067	9.02549	LOC_Os04g47190
Chr4_28028514	4	28028514	7.47366	LOC_Os04g47190
Chr4_28029034	4	28029034	9.62709	LOC_Os04g47190
Chr4_28029361	4	28029361	8.16749	LOC_Os04g47190
Chr4_28029474	4	28029474	7.3851	LOC_Os04g47190
Chr4_28029542	4	28029542	9.87943	LOC_Os04g47190
Chr4_28029612	4	28029612	8.44009	LOC_Os04g47190
Chr4_28030635	4	28030635	7.56703		LOC_Os04g47190
Chr4_28031170	4	28031170	10.0872		LOC_Os04g47190
Chr4_28031186	4	28031186	8.37263		LOC_Os04g47190
Chr4_28031206	4	28031206	8.58838		LOC_Os04g47190
Chr4_28031218	4	28031218	9.21325		LOC_Os04g47190
Chr4_28031269	4	28031269	7.49894		LOC_Os04g47190
Chr4_28031427	4	28031427	6.4698		LOC_Os04g47190
Chr4_28031587	4	28031587	9.00087		LOC_Os04g47190
Chr4_28031629	4	28031629	8.00877		LOC_Os04g47190
Chr4_28032008	4	28032008	9.18509		LOC_Os04g47190
Chr4_28032161	4	28032161	8.46344		LOC_Os04g47190
Chr4_28032508	4	28032508	8.92082		LOC_Os04g47190
Chr4_28033019	4	28033019	7.39577
Chr4_28033147	4	28033147	7.49621	LOC_Os04g47200
Chr4_28033257	4	28033257	7.87943	LOC_Os04g47200
Chr4_28033289	4	28033289	8.05899	LOC_Os04g47200
Chr4_28033322	4	28033322	9.33161	LOC_Os04g47200
Chr4_28033443	4	28033443	7.56225	LOC_Os04g47200
Chr4_28033465	4	28033465	8.51004	LOC_Os04g47200
Chr4_28033601	4	28033601	6.81248	LOC_Os04g47200
Chr4_28033604	4	28033604	6.8962	LOC_Os04g47200
Chr4_28036840	4	28036840	6.53165
Chr4_28036913	4	28036913	8.23582
Chr4_28036914	4	28036914	8.38934
Chr4_28037176	4	28037176	8.46852
Chr4_28037240	4	28037240	10.1361
Chr4_28037267	4	28037267	7.81816
Chr4_28037353	4	28037353	7.67778
Chr4_28037416	4	28037416	6.76955
Chr4_28037465	4	28037465	10.3279
Chr4_28037522	4	28037522	8.61439
Chr4_28037544	4	28037544	7.03386
Chr4_28037828	4	28037828	7.56225
Chr4_28037848	4	28037848	8.33348
Chr4_28037907	4	28037907	9.38091
Chr4_28038331	4	28038331	9.25727
Chr4_28039169	4	28039169	9.01412
Chr4_28039387	4	28039387	8.91009
Chr4_28039528	4	28039528	9.22841		LOC_Os04g47210
Chr4_28039888	4	28039888	7.56225		LOC_Os04g47210
Chr4_28040288	4	28040288	10.266		LOC_Os04g47210
Chr4_28040434	4	28040434	8.4908		LOC_Os04g47210
Chr4_28040491	4	28040491	8.60033		LOC_Os04g47210
Chr4_28040495	4	28040495	8.6038		LOC_Os04g47210
Chr4_28040505	4	28040505	8.60206		LOC_Os04g47210
Chr4_28040516	4	28040516	8.03621		LOC_Os04g47210
Chr4_28045025	4	28045025	9.3098		LOC_Os04g47220
Chr4_28045165	4	28045165	8.6925		LOC_Os04g47220
Chr4_28045651	4	28045651	8.80688		LOC_Os04g47220
Chr4_28045675	4	28045675	9.95861		LOC_Os04g47220
Chr4_28045932	4	28045932	7.98297		LOC_Os04g47220
Chr4_28046072	4	28046072	10.5575		LOC_Os04g47220
Chr4_28046474	4	28046474	8.95078		LOC_Os04g47220
Chr4_28046843	4	28046843	9.9393	LOC_Os04g47220
Chr4_28049331	4	28049331	8.24109	LOC_Os04g47240
Chr4_28049745	4	28049745	9.08991	LOC_Os04g47240
Chr4_28050268	4	28050268	7.7986	LOC_Os04g47240
Chr4_28051001	4	28051001	9.10073	LOC_Os04g47240
Chr4_28051434	4	28051434	8.66959	LOC_Os04g47240
Chr4_28053553	4	28053553	5.92445	LOC_Os04g47240
Chr4_28056572	4	28056572	8.50307	LOC_Os04g47240
Chr4_28057100	4	28057100	7.19518	LOC_Os04g47240	LOC_Os04g47240
Chr4_28057565	4	28057565	7.29499		LOC_Os04g47240
Chr4_28057955	4	28057955	6.65365		LOC_Os04g47240
Chr4_28058044	4	28058044	8.64782		LOC_Os04g47240
Chr4_28058125	4	28058125	9.8962		LOC_Os04g47240
Chr4_28058486	4	28058486	8.56864		LOC_Os04g47240
Chr4_28059028	4	28059028	8.33161		LOC_Os04g47240
Chr4_28059137	4	28059137	7.2233
Chr4_28059239	4	28059239	8.84771
Chr4_28059274	4	28059274	9.09637
Chr4_28059539	4	28059539	9.03574
Chr4_28059741	4	28059741	9.53462
Chr4_28059842	4	28059842	8.02919
Chr4_28060594	4	28060594	7.8041
Chr4_28061150	4	28061150	8.21824
Chr4_28061152	4	28061152	8.25885
Chr4_28061681	4	28061681	8.40121	LOC_Os04g47250
Chr4_28061844	4	28061844	6.7167	LOC_Os04g47250
Chr4_28062663	4	28062663	9.34775	LOC_Os04g47250
Chr4_28064591	4	28064591	8.70774		LOC_Os04g47250
Chr4_28064597	4	28064597	8.4318		LOC_Os04g47250
Chr4_28064608	4	28064608	8.77989		LOC_Os04g47250
Chr4_28064639	4	28064639	8.83268		LOC_Os04g47250
Chr4_28064654	4	28064654	7.47886		LOC_Os04g47250
Chr4_28064693	4	28064693	9.28651		LOC_Os04g47250
Chr4_28064701	4	28064701	8.70333		LOC_Os04g47250
Chr4_28064716	4	28064716	8.45967		LOC_Os04g47250
Chr4_28064754	4	28064754	9.33536		LOC_Os04g47250
Chr4_28065297	4	28065297	8.77989	LOC_Os04g47260	LOC_Os04g47250
Chr4_28066786	4	28066786	9.37675	LOC_Os04g47260
Chr4_28067348	4	28067348	8.92082	LOC_Os04g47270
Chr4_28067414	4	28067414	9.42366	LOC_Os04g47270
Chr4_28071156	4	28071156	8.74473		LOC_Os04g47270
Chr4_28071727	4	28071727	7.49757	LOC_Os04g47280	LOC_Os04g47270
Chr4_28071741	4	28071741	8.60555	LOC_Os04g47280	LOC_Os04g47270
Chr4_28072191	4	28072191	9.16431	LOC_Os04g47280	LOC_Os04g47270
Chr4_28072960	4	28072960	8.03152	LOC_Os04g47280
Chr4_28073016	4	28073016	7.44855	LOC_Os04g47280
Chr4_28073319	4	28073319	8.73283	LOC_Os04g47280
Chr4_28074912	4	28074912	9.54821		LOC_Os04g47280
Chr4_28075046	4	28075046	8.4908		LOC_Os04g47280
Chr4_28075246	4	28075246	8.36856		LOC_Os04g47280
Chr4_28077332	4	28077332	6.22695	LOC_Os04g47290
Chr4_28078201	4	28078201	9.24185	LOC_Os04g47290
Chr4_28079360	4	28079360	9.09151	LOC_Os04g47290
Chr4_28079524	4	28079524	8.51004	LOC_Os04g47290
Chr4_28080773	4	28080773	8.63451	LOC_Os04g47290
Chr4_28082398	4	28082398	9.37366		LOC_Os04g47300
Chr4_28083241	4	28083241	8.80967		LOC_Os04g47300
Chr4_28083259	4	28083259	8.88606		LOC_Os04g47300
Chr4_28083490	4	28083490	9.37263		LOC_Os04g47300
Chr4_28083551	4	28083551	8.84771		LOC_Os04g47300
Chr4_28084266	4	28084266	8.56703	LOC_Os04g47310	LOC_Os04g47300
Chr4_28084543	4	28084543	8.79048	LOC_Os04g47310
Chr4_28084627	4	28084627	9.25337	LOC_Os04g47310
Chr4_28085137	4	28085137	9.24489	LOC_Os04g47310
Chr4_28086155	4	28086155	9.59517
Chr4_28086169	4	28086169	9.01278
Chr4_28086236	4	28086236	8.76195
Chr4_28086885	4	28086885	12.5003
Chr4_28086887	4	28086887	12.3429
Chr4_28087069	4	28087069	8.07109
Chr4_28087153	4	28087153	7.02826
Chr4_28087294	4	28087294	9.00656
Chr4_28087327	4	28087327	6.03105
Chr4_28087333	4	28087333	11.4647
Chr4_28087510	4	28087510	7.35262
Chr4_28088307	4	28088307	5.51286
Chr4_28088339	4	28088339	10.0737
Chr4_28088377	4	28088377	11.3233
Chr4_28088610	4	28088610	8.11691
Chr4_28088698	4	28088698	8.89279
Chr4_28089987	4	28089987	9.48545		LOC_Os04g47320
Chr4_28090108	4	28090108	9.42481		LOC_Os04g47320
Chr4_28090205	4	28090205	9.16494		LOC_Os04g47320
Chr4_28090388	4	28090388	9.08938		LOC_Os04g47320
Chr4_28090410	4	28090410	7.75449		LOC_Os04g47320
Chr4_28090589	4	28090589	7.63078		LOC_Os04g47320
Chr4_28090604	4	28090604	8.18709		LOC_Os04g47320
Chr4_28090615	4	28090615	7.57512		LOC_Os04g47320
Chr4_28090710	4	28090710	7.24795		LOC_Os04g47320
Chr4_28092656	4	28092656	7.52288	LOC_Os04g47320
Chr4_28094928	4	28094928	9.07676	LOC_Os04g47320
Chr4_28095370	4	28095370	9.4034
Chr4_28096070	4	28096070	8.10292
Chr4_28096812	4	28096812	9.17849	LOC_Os04g47330
Chr4_28096821	4	28096821	9.37986	LOC_Os04g47330
Chr4_28096824	4	28096824	9.25727	LOC_Os04g47330
Chr4_28096833	4	28096833	5.59517	LOC_Os04g47330
Chr4_28096839	4	28096839	9.17457	LOC_Os04g47330
Chr4_28096958	4	28096958	7.16558	LOC_Os04g47330
Chr4_28096978	4	28096978	8.00966	LOC_Os04g47330
Chr4_28097003	4	28097003	5.90658	LOC_Os04g47330
Chr4_28097141	4	28097141	8.20412	LOC_Os04g47330
Chr4_28097874	4	28097874	6.03198		LOC_Os04g47330
Chr4_28098407	4	28098407	5.67366		LOC_Os04g47330
Chr4_28098467	4	28098467	8.66555		LOC_Os04g47330
Chr4_28098691	4	28098691	9.92812		LOC_Os04g47330
Chr4_28098884	4	28098884	7.00833		LOC_Os04g47330
Chr4_28099393	4	28099393	8.22768		LOC_Os04g47330
Chr4_28099632	4	28099632	6.23284
Chr4_28099701	4	28099701	7.74958
Chr4_28099906	4	28099906	7.60033
Chr4_28100346	4	28100346	6.10347
Chr4_28100470	4	28100470	7.01055
Chr4_28100737	4	28100737	7.45469
Chr4_28100772	4	28100772	7.1343
Chr4_28100852	4	28100852	10.3645
Chr4_28100908	4	28100908	7.98716
Chr4_28100923	4	28100923	7.8962
Chr4_28101136	4	28101136	8.98297
Chr4_28101284	4	28101284	9.2668
Chr4_28101287	4	28101287	9.39362
Chr4_28101346	4	28101346	7.24185
Chr4_28101546	4	28101546	8.33819
Chr4_28101955	4	28101955	9.36754
Chr4_28102024	4	28102024	9.18243
Chr4_28102105	4	28102105	9.29073
Chr4_28102359	4	28102359	9.21112
Chr4_28102412	4	28102412	10.7986
Chr4_28102486	4	28102486	9.51999
Chr4_28102581	4	28102581	6.16052
Chr4_28102617	4	28102617	9.59176
Chr4_28102768	4	28102768	8.48017
Chr4_28102893	4	28102893	9.47237
Chr4_28102940	4	28102940	8.72816
Chr4_28103026	4	28103026	8.1512
Chr4_28103033	4	28103033	8.22841
Chr4_28103105	4	28103105	8.11862
Chr4_28103212	4	28103212	9.61979
Chr4_28103252	4	28103252	9.24109
Chr4_28103598	4	28103598	6.28819
Chr4_28103682	4	28103682	6.36452
Chr4_28103896	4	28103896	8.14752
Chr4_28103938	4	28103938	7.94692
Chr4_28104258	4	28104258	9.05159
Chr4_28104267	4	28104267	9.0655
Chr4_28104388	4	28104388	9.60555
Chr4_28104533	4	28104533	9.17849
Chr4_28104549	4	28104549	8.68825
Chr4_28104593	4	28104593	6.94692
Chr4_28104782	4	28104782	8.85699
Chr4_28105192	4	28105192	8.4168
Chr4_28105406	4	28105406	8.98297
Chr4_28105424	4	28105424	7.36552
Chr4_28105797	4	28105797	7.58838	LOC_Os04g47350
Chr4_28105879	4	28105879	8.95078	LOC_Os04g47350
Chr4_28105890	4	28105890	9.09528	LOC_Os04g47350
Chr4_28105995	4	28105995	8.45593	LOC_Os04g47350
Chr4_28106016	4	28106016	7.91721	LOC_Os04g47350
Chr4_28106040	4	28106040	9.58004	LOC_Os04g47350
Chr4_28106050	4	28106050	10.1355	LOC_Os04g47350
Chr4_28106152	4	28106152	8.92445	LOC_Os04g47350
Chr4_28106204	4	28106204	10.6737	LOC_Os04g47350
Chr4_28106533	4	28106533	6.93181	LOC_Os04g47350
Chr4_28106787	4	28106787	8.17849	LOC_Os04g47350	LOC_Os04g47360
Chr4_28107084	4	28107084	6.69465	LOC_Os04g47350	LOC_Os04g47360
Chr4_28107115	4	28107115	10.7825	LOC_Os04g47350	LOC_Os04g47360
Chr4_28107360	4	28107360	7.31247	LOC_Os04g47350	LOC_Os04g47360
Chr4_28107493	4	28107493	5.86646	LOC_Os04g47350	LOC_Os04g47360
Chr4_28107545	4	28107545	9.70553	LOC_Os04g47350	LOC_Os04g47360
Chr4_28107552	4	28107552	5.51999	LOC_Os04g47350	LOC_Os04g47360
Chr4_28108849	4	28108849	9.27737	LOC_Os04g47360	LOC_Os04g47350
Chr4_28109323	4	28109323	5.80967	LOC_Os04g47360	LOC_Os04g47350
Chr4_28109336	4	28109336	6.48413	LOC_Os04g47360	LOC_Os04g47350
Chr4_28109420	4	28109420	10.1451	LOC_Os04g47360	LOC_Os04g47350
Chr4_28109454	4	28109454	9.93554	LOC_Os04g47360	LOC_Os04g47350
Chr4_28110036	4	28110036	9.31966	LOC_Os04g47360
Chr4_28111963	4	28111963	8.09098	LOC_Os04g47360
Chr4_28112443	4	28112443	9.10958	LOC_Os04g47360
Chr4_28113292	4	28113292	6.22621	LOC_Os04g47360	LOC_Os04g47370
Chr4_28113296	4	28113296	9.09313	LOC_Os04g47360	LOC_Os04g47370
Chr4_28113350	4	28113350	9.45346	LOC_Os04g47360	LOC_Os04g47370
Chr4_28113355	4	28113355	8.7122	LOC_Os04g47360	LOC_Os04g47370
Chr4_28113369	4	28113369	6.15739	LOC_Os04g47360	LOC_Os04g47370
Chr4_28113410	4	28113410	8.65365	LOC_Os04g47360	LOC_Os04g47370
Chr4_28113521	4	28113521	9.49894	LOC_Os04g47360	LOC_Os04g47370
Chr4_28113707	4	28113707	9.22768		LOC_Os04g47370
Chr4_28113771	4	28113771	9.69465		LOC_Os04g47370
Chr4_28113871	4	28113871	7.99568		LOC_Os04g47370
Chr4_28113904	4	28113904	8.24489		LOC_Os04g47370
Chr4_28113928	4	28113928	7.58004		LOC_Os04g47370
Chr4_28113939	4	28113939	8.02		LOC_Os04g47370
Chr4_28114071	4	28114071	9.17134		LOC_Os04g47370
Chr4_28114285	4	28114285	10.0009		LOC_Os04g47370
Chr4_28116360	4	28116360	9.68613	LOC_Os04g47370
Chr4_28116438	4	28116438	9.767	LOC_Os04g47370
Chr4_28116595	4	28116595	9.97469	LOC_Os04g47370
Chr4_28116746	4	28116746	9.75945	LOC_Os04g47370
Chr4_28117713	4	28117713	7.03433
Chr4_28117735	4	28117735	9.48545
Chr4_28117801	4	28117801	9.19723
Chr4_28118300	4	28118300	10.3947	LOC_Os04g47380
Chr4_28118707	4	28118707	5.77469	LOC_Os04g47380
Chr4_28118861	4	28118861	9.63078	LOC_Os04g47380
Chr4_28119449	4	28119449	6.29243	LOC_Os04g47380
Chr4_28120594	4	28120594	9.54516	LOC_Os04g47380
Chr4_28120766	4	28120766	10.0177	LOC_Os04g47380
Chr4_28120998	4	28120998	10.4034	LOC_Os04g47380
Chr4_28121072	4	28121072	5.88606	LOC_Os04g47380
Chr4_28121192	4	28121192	9.31158	LOC_Os04g47380
Chr4_28121206	4	28121206	9.50031	LOC_Os04g47380
Chr4_28122087	4	28122087	7.81531	LOC_Os04g47380
Chr4_28122407	4	28122407	9.82102	LOC_Os04g47380
Chr4_28122730	4	28122730	9.47366		LOC_Os04g47380
Chr4_28122766	4	28122766	9.42136		LOC_Os04g47380
Chr4_28122888	4	28122888	10.0531		LOC_Os04g47380
Chr4_28123094	4	28123094	9.92445		LOC_Os04g47380
Chr4_28123189	4	28123189	9.61083		LOC_Os04g47380
Chr4_28123459	4	28123459	10.2343		LOC_Os04g47380
Chr4_28123522	4	28123522	9.12901		LOC_Os04g47380
Chr4_28124004	4	28124004	9.23657	LOC_Os04g47390	LOC_Os04g47380
Chr4_28124282	4	28124282	9.4023	LOC_Os04g47390	LOC_Os04g47380
Chr4_28125419	4	28125419	8.22841		LOC_Os04g47390
Chr4_28125441	4	28125441	9.60206		LOC_Os04g47390
Chr4_28125629	4	28125629	10.6478		LOC_Os04g47390
Chr4_28125854	4	28125854	8.85699		LOC_Os04g47390
Chr4_28126294	4	28126294	9.33536		LOC_Os04g47390
Chr4_28126428	4	28126428	9.78252		LOC_Os04g47390
Chr4_28126738	4	28126738	9.32698		LOC_Os04g47390
Chr4_28126791	4	28126791	7.79588		LOC_Os04g47390
Chr4_28126897	4	28126897	6.53611	LOC_Os04g47400	LOC_Os04g47390
Chr4_28126959	4	28126959	9.6216	LOC_Os04g47400	LOC_Os04g47390
Chr4_28128319	4	28128319	10.2848	LOC_Os04g47400
Chr4_28128320	4	28128320	9.89963	LOC_Os04g47400
Chr4_28128321	4	28128321	10.3325	LOC_Os04g47400
Chr4_28128433	4	28128433	9.21538	LOC_Os04g47400
Chr4_28128550	4	28128550	9.34008	LOC_Os04g47400
Chr4_28129196	4	28129196	9.66154	LOC_Os04g47400	LOC_Os04g47410
Chr4_28129385	4	28129385	9.66354	LOC_Os04g47400	LOC_Os04g47410
Chr4_28129390	4	28129390	9.77469	LOC_Os04g47400	LOC_Os04g47410
Chr4_28129423	4	28129423	9.54061	LOC_Os04g47400	LOC_Os04g47410
Chr4_28129434	4	28129434	9.1512	LOC_Os04g47400	LOC_Os04g47410
Chr4_28129498	4	28129498	9.82974	LOC_Os04g47400	LOC_Os04g47410
Chr4_28129544	4	28129544	8.39147	LOC_Os04g47400	LOC_Os04g47410
Chr4_28129738	4	28129738	8.86646	LOC_Os04g47400	LOC_Os04g47410
Chr4_28130223	4	28130223	8.34104	LOC_Os04g47400	LOC_Os04g47410
Chr4_28131158	4	28131158	9.42136	LOC_Os04g47410	LOC_Os04g47400
Chr4_28131172	4	28131172	7.66959	LOC_Os04g47410	LOC_Os04g47400
Chr4_28131297	4	28131297	7.05899	LOC_Os04g47410	LOC_Os04g47400
Chr4_28132172	4	28132172	9.51999	LOC_Os04g47410	LOC_Os04g47400
Chr4_28132177	4	28132177	9.52288	LOC_Os04g47410	LOC_Os04g47400
Chr4_28132238	4	28132238	8.81816	LOC_Os04g47410	LOC_Os04g47400
Chr4_28135712	4	28135712	11.058	LOC_Os04g47410
Chr4_28135762	4	28135762	10.2154	LOC_Os04g47410
Chr4_28136457	4	28136457	10.0545	LOC_Os04g47410
Chr4_28136566	4	28136566	7.11126	LOC_Os04g47410
Chr4_28136617	4	28136617	9.73518	LOC_Os04g47410
Chr4_28136964	4	28136964	8.92812
Chr4_28137059	4	28137059	8.16749
Chr4_28137157	4	28137157	9.39362
Chr4_28137286	4	28137286	9.5157
Chr4_28137325	4	28137325	9.86967
Chr4_28137339	4	28137339	9.30539
Chr4_28137374	4	28137374	10.1785
Chr4_28137414	4	28137414	9.73755
Chr4_28137475	4	28137475	9.39469
Chr4_28137491	4	28137491	9.4318
Chr4_28138295	4	28138295	8.27737	LOC_Os04g47420
Chr4_28138793	4	28138793	8.82102	LOC_Os04g47420
Chr4_28139376	4	28139376	8.91009	LOC_Os04g47420
Chr4_28140308	4	28140308	9.383		LOC_Os04g47420
Chr4_28140468	4	28140468	9.91721		LOC_Os04g47420
Chr4_28140470	4	28140470	9.98716		LOC_Os04g47420
Chr4_28140514	4	28140514	9.27737		LOC_Os04g47420
Chr4_28140544	4	28140544	8.79588		LOC_Os04g47420
Chr4_28140980	4	28140980	9.48545		LOC_Os04g47420
Chr4_28141184	4	28141184	8.28483		LOC_Os04g47420
Chr4_28141374	4	28141374	9.42136		LOC_Os04g47420
Chr4_28141425	4	28141425	9.38616		LOC_Os04g47420
Chr4_28141473	4	28141473	8.95468		LOC_Os04g47420
Chr4_28141722	4	28141722	8.00349		LOC_Os04g47420
Chr4_28141729	4	28141729	8.43771		LOC_Os04g47420
Chr4_28142008	4	28142008	8.61261		LOC_Os04g47430
Chr4_28142048	4	28142048	7.31695		LOC_Os04g47430
Chr4_28142092	4	28142092	7.54821		LOC_Os04g47430
Chr4_28146545	4	28146545	7.87615
Chr4_28146720	4	28146720	9.08778
Chr4_28146792	4	28146792	9.28904
Chr4_28146903	4	28146903	7.91364
Chr4_28146909	4	28146909	8.37986
Chr4_28148145	4	28148145	10.3335
Chr4_28148845	4	28148845	9.29499
Chr4_28149536	4	28149536	8.35655
Chr4_28149817	4	28149817	9.46218
Chr4_28149824	4	28149824	9.24489
Chr4_28149833	4	28149833	9.78516
Chr4_28149863	4	28149863	9.85699
Chr4_28149928	4	28149928	6.84771
Chr4_28150082	4	28150082	6.98297
Chr4_28150323	4	28150323	9.45967
Chr4_28150332	4	28150332	8.41794
Chr4_28150648	4	28150648	8.73049
Chr4_28150683	4	28150683	9.14509
Chr4_28150951	4	28150951	8.9393
Chr4_28151147	4	28151147	9.2652
Chr4_28151215	4	28151215	8.16877
Chr4_28151377	4	28151377	6.73283
Chr4_28151814	4	28151814	7.87943
Chr4_28152591	4	28152591	9.78516
Chr4_28152803	4	28152803	8.97881
Chr4_28152813	4	28152813	8.72354
Chr4_28152830	4	28152830	9.48545
Chr4_28153192	4	28153192	7.6517
Chr4_28153219	4	28153219	9.96257
Chr4_28153284	4	28153284	8.81816
Chr4_28153320	4	28153320	8.74958
Chr4_28153428	4	28153428	9.44977
Chr4_28153962	4	28153962	9.93181
Chr4_28154106	4	28154106	5.9393		LOC_Os04g47450
Chr4_28154269	4	28154269	9.23433		LOC_Os04g47450
Chr4_28154540	4	28154540	9.1107		LOC_Os04g47450
Chr4_28154852	4	28154852	9.45842		LOC_Os04g47450
Chr4_28154966	4	28154966	9.56225		LOC_Os04g47450
Chr4_28155118	4	28155118	10.0391		LOC_Os04g47450
Chr4_28155131	4	28155131	9.55752		LOC_Os04g47450
Chr4_28155134	4	28155134	8.47366		LOC_Os04g47450
Chr4_28155557	4	28155557	9.33819		LOC_Os04g47450
Chr4_28155912	4	28155912	9.8962		LOC_Os04g47450
Chr4_28156235	4	28156235	7.50585	LOC_Os04g47450
Chr4_28156807	4	28156807	7.67778	LOC_Os04g47450
Chr4_28157096	4	28157096	8.75449	LOC_Os04g47450
Chr4_28157234	4	28157234	6.86967
Chr4_28157634	4	28157634	9.65365
Chr4_28157831	4	28157831	9.33255
Chr4_28158082	4	28158082	10.1891
Chr4_28158417	4	28158417	8.79317
Chr4_28158527	4	28158527	9.27246
Chr4_28158547	4	28158547	9.13549
Chr4_28158548	4	28158548	9.20204
Chr4_28158612	4	28158612	9.24489
Chr4_28159261	4	28159261	7.25727
Chr4_28159349	4	28159349	6.80967
Chr4_28159397	4	28159397	7.91009
Chr4_28159452	4	28159452	7.25493
Chr4_28159662	4	28159662	7.11748
Chr4_28159863	4	28159863	6.57349
Chr4_28159973	4	28159973	6.22621
Chr4_28160032	4	28160032	6.83268
Chr4_28160143	4	28160143	5.77211
Chr4_28160185	4	28160185	6.74958
Chr4_28160193	4	28160193	6.32422
Chr4_28160195	4	28160195	6.65365
Chr4_28160273	4	28160273	7.0655
Chr4_28160275	4	28160275	7.25649
Chr4_28160452	4	28160452	7.07935
Chr4_28160474	4	28160474	7.16685
Chr4_28160597	4	28160597	6.8041
Chr4_28160628	4	28160628	5.56543
Chr4_28160723	4	28160723	7.42597
Chr4_28161261	4	28161261	6.61979
Chr4_28161394	4	28161394	6.80967
Chr4_28161454	4	28161454	6.81816
Chr4_28161841	4	28161841	6.58004
Chr4_28161844	4	28161844	6.53611
Chr4_28161855	4	28161855	6.40561
Chr4_28162057	4	28162057	7.12552
Chr4_28162061	4	28162061	7.29158
Chr4_28162079	4	28162079	6.1798
Chr4_28162133	4	28162133	7.03574
Chr4_28162767	4	28162767	7.3363
Chr4_28162781	4	28162781	6.77728
Chr4_28162784	4	28162784	5.77728
Chr4_28162861	4	28162861	6.1261
Chr4_28162867	4	28162867	5.66959
Chr4_28162988	4	28162988	7.057
Chr4_28163002	4	28163002	8.36957
Chr4_28163009	4	28163009	7.451
Chr4_28163042	4	28163042	6.29585
Chr4_28163094	4	28163094	5.7986
Chr4_28163165	4	28163165	7.91721
Chr4_28163352	4	28163352	7.57025
Chr4_28163400	4	28163400	6.91364
Chr4_28163411	4	28163411	6.86012
Chr4_28163433	4	28163433	6.97469
Chr4_28163477	4	28163477	6.78781
Chr4_28163509	4	28163509	5.62342
Chr4_28163614	4	28163614	6.18776
Chr4_28163658	4	28163658	6.54821
Chr4_28163788	4	28163788	6.27165
Chr4_28163790	4	28163790	5.82681
Chr4_28163812	4	28163812	6.37161
Chr4_28164421	4	28164421	6.77728	LOC_Os04g47460
Chr4_28165263	4	28165263	6.00261		LOC_Os04g47460
Chr4_28165396	4	28165396	6.62709		LOC_Os04g47460
Chr4_28165513	4	28165513	8		LOC_Os04g47460
Chr4_28165527	4	28165527	6.93181		LOC_Os04g47460
Chr4_28165536	4	28165536	7.23284		LOC_Os04g47460
Chr4_28165544	4	28165544	7.52871		LOC_Os04g47460
Chr4_28165602	4	28165602	6.74473		LOC_Os04g47460
Chr4_28165817	4	28165817	6.58004		LOC_Os04g47460
Chr4_28165983	4	28165983	5.9393		LOC_Os04g47460
Chr4_28166518	4	28166518	6		LOC_Os04g47460
Chr4_28166523	4	28166523	6.79588		LOC_Os04g47460
Chr4_28166851	4	28166851	7.10902	LOC_Os04g47470	LOC_Os04g47460
Chr4_28166896	4	28166896	6.45593	LOC_Os04g47470	LOC_Os04g47460
Chr4_28166899	4	28166899	6.34199	LOC_Os04g47470	LOC_Os04g47460
Chr4_28166900	4	28166900	6.33442	LOC_Os04g47470	LOC_Os04g47460
Chr4_28166950	4	28166950	6.61618	LOC_Os04g47470	LOC_Os04g47460
Chr4_28167012	4	28167012	6.18642	LOC_Os04g47470	LOC_Os04g47460
Chr4_28167055	4	28167055	5.91364	LOC_Os04g47470	LOC_Os04g47460
Chr4_28167360	4	28167360	5.99568
Chr4_28167576	4	28167576	5.52288
Chr4_28167603	4	28167603	7.09691
Chr4_28167916	4	28167916	6.89279
Chr4_28167927	4	28167927	7
Chr4_28167949	4	28167949	5.67985
Chr4_28168094	4	28168094	6.74473
Chr4_28168116	4	28168116	7.5986
Chr4_28168229	4	28168229	6.84466
Chr4_28168262	4	28168262	6.65956
Chr4_28168401	4	28168401	7.1831		LOC_Os04g47480
Chr4_28168550	4	28168550	6.20901		LOC_Os04g47480
Chr4_28168562	4	28168562	5.84771		LOC_Os04g47480
Chr4_28168647	4	28168647	7.10791		LOC_Os04g47480
Chr4_28168772	4	28168772	6.23958		LOC_Os04g47480
Chr4_28168775	4	28168775	6.7986		LOC_Os04g47480
Chr4_28168803	4	28168803	6.70115		LOC_Os04g47480
Chr4_28168828	4	28168828	6.64397		LOC_Os04g47480
Chr4_28168949	4	28168949	6.84466		LOC_Os04g47480
Chr4_28168969	4	28168969	7.10679		LOC_Os04g47480
Chr4_28168993	4	28168993	6.63451		LOC_Os04g47480
Chr4_28169009	4	28169009	5.60206		LOC_Os04g47480
Chr4_28169029	4	28169029	6.46218		LOC_Os04g47480
Chr4_28169059	4	28169059	7.45717		LOC_Os04g47480
Chr4_28169094	4	28169094	7.3279		LOC_Os04g47480
Chr4_28169495	4	28169495	6.5986		LOC_Os04g47480
Chr4_28169505	4	28169505	7.07314		LOC_Os04g47480
Chr4_28169553	4	28169553	7.08778		LOC_Os04g47480
Chr4_28169567	4	28169567	6.24718		LOC_Os04g47480
Chr4_28169686	4	28169686	7.68403		LOC_Os04g47480
Chr4_28169701	4	28169701	6.68194		LOC_Os04g47480
Chr4_28169715	4	28169715	6.58336		LOC_Os04g47480
Chr4_28170049	4	28170049	6.5867		LOC_Os04g47480
Chr4_28170061	4	28170061	5.95468		LOC_Os04g47480
Chr4_28170554	4	28170554	6.24413	LOC_Os04g47480
Chr4_28170972	4	28170972	7.35164	LOC_Os04g47480
Chr4_28171302	4	28171302	7.34775	LOC_Os04g47480
Chr4_28171362	4	28171362	7.45842	LOC_Os04g47480
Chr4_28171610	4	28171610	6.05849	LOC_Os04g47480
Chr4_28173151	4	28173151	6.92445	LOC_Os04g47480
Chr4_28174677	4	28174677	5.86012
Chr4_28174682	4	28174682	5.75203
Chr4_28174695	4	28174695	6.85387
Chr4_28174713	4	28174713	6.65758
Chr4_28174766	4	28174766	7.67778
Chr4_28174851	4	28174851	6.18046
Chr4_28174855	4	28174855	6.76195
Chr4_28175028	4	28175028	6.74715
Chr4_28175125	4	28175125	7.28233
Chr4_28175185	4	28175185	6.06651
Chr4_28175731	4	28175731	5.767
Chr4_28175769	4	28175769	5.58336
Chr4_28175829	4	28175829	5.62525
Chr4_28176362	4	28176362	6.24413
Chr4_28176575	4	28176575	5.95078
Chr4_28176603	4	28176603	5.767
Chr4_28176639	4	28176639	7.77728
Chr4_28177361	4	28177361	7.35067	LOC_Os04g47490
Chr4_28177375	4	28177375	6.38722	LOC_Os04g47490
Chr4_28177493	4	28177493	6.65561	LOC_Os04g47490
Chr4_28177791	4	28177791	7.01278		LOC_Os04g47490
Chr4_28177954	4	28177954	7.40782		LOC_Os04g47490
Chr4_28178118	4	28178118	6.55909		LOC_Os04g47490
Chr4_28178154	4	28178154	6.73518		LOC_Os04g47490
Chr4_28178206	4	28178206	7.75696		LOC_Os04g47490
Chr4_28178263	4	28178263	6.16622		LOC_Os04g47490
Chr4_28178353	4	28178353	9.91009		LOC_Os04g47490
Chr4_28179443	4	28179443	8.47237	LOC_Os04g47500	LOC_Os04g47490
Chr4_28179989	4	28179989	6.76195	LOC_Os04g47500	LOC_Os04g47510
Chr4_28180407	4	28180407	6.88273		LOC_Os04g47510
Chr4_28180692	4	28180692	8.16622	LOC_Os04g47510	LOC_Os04g47500
Chr4_28180707	4	28180707	6.16368	LOC_Os04g47510	LOC_Os04g47500
Chr4_28180854	4	28180854	7.31247	LOC_Os04g47510	LOC_Os04g47500
Chr4_28180862	4	28180862	6.99568	LOC_Os04g47510	LOC_Os04g47500
Chr4_28180866	4	28180866	7.24949	LOC_Os04g47510	LOC_Os04g47500
Chr4_28181021	4	28181021	8.28735	LOC_Os04g47510	LOC_Os04g47500
Chr4_28181059	4	28181059	7.84164		LOC_Os04g47500
Chr4_28181072	4	28181072	6.78516		LOC_Os04g47500
Chr4_28181144	4	28181144	8.25414		LOC_Os04g47500
Chr4_28181673	4	28181673	7.52724	LOC_Os04g47520	LOC_Os04g47500
Chr4_28181736	4	28181736	7.11634	LOC_Os04g47520	LOC_Os04g47500
Chr4_28183268	4	28183268	7.17587	LOC_Os04g47520
Chr4_28183348	4	28183348	6.25885	LOC_Os04g47520
Chr4_28183933	4	28183933	7.33442	LOC_Os04g47520
Chr4_28184205	4	28184205	7.2636	LOC_Os04g47520
Chr4_28184627	4	28184627	7.16558	LOC_Os04g47520
Chr4_28184729	4	28184729	6.5986	LOC_Os04g47520
Chr4_28186720	4	28186720	7.6517		LOC_Os04g47520
Chr4_28187228	4	28187228	5.83565		LOC_Os04g47520
Chr4_28187668	4	28187668	6.50031
Chr4_28187884	4	28187884	7.55284
Chr4_28187931	4	28187931	7.56384
Chr4_28189751	4	28189751	6.87615
Chr4_28189758	4	28189758	7.31158
Chr4_28190218	4	28190218	5.8041
Chr4_28190230	4	28190230	6.12205
Chr4_28190238	4	28190238	5.71897
Chr4_28190273	4	28190273	8.02228
Chr4_28190295	4	28190295	8.10791
Chr4_28190706	4	28190706	7.51145
Chr4_28190907	4	28190907	7.00789
Chr4_28190926	4	28190926	7.37161
Chr4_28191535	4	28191535	7.3098
Chr4_28191608	4	28191608	6.87943
Chr4_28191730	4	28191730	7.75696
Chr4_28191797	4	28191797	7.07935
Chr4_28191800	4	28191800	7.10237
Chr4_28191811	4	28191811	7.62709
Chr4_28191813	4	28191813	7.73518
Chr4_28191942	4	28191942	8.09528
Chr4_28192207	4	28192207	7.54975	LOC_Os04g47530
Chr4_28192247	4	28192247	7.53313	LOC_Os04g47530
Chr4_28193244	4	28193244	5.85387	LOC_Os04g47530
Chr4_28193341	4	28193341	8.4828	LOC_Os04g47530
Chr4_28194169	4	28194169	6.33348	LOC_Os04g47530
Chr4_28194352	4	28194352	7.90309	LOC_Os04g47530
Chr4_28194472	4	28194472	7.46092	LOC_Os04g47530
Chr4_28195021	4	28195021	7.89963	LOC_Os04g47530
Chr4_28195231	4	28195231	7.24336	LOC_Os04g47530
Chr4_28195340	4	28195340	6.19179	LOC_Os04g47530
Chr4_28196053	4	28196053	6.41567	LOC_Os04g47530	LOC_Os04g47550
Chr4_28196180	4	28196180	6.15614		LOC_Os04g47530
Chr4_28196201	4	28196201	6.43533		LOC_Os04g47530
Chr4_28196211	4	28196211	5.88273		LOC_Os04g47530
Chr4_28196316	4	28196316	7.54975		LOC_Os04g47530
Chr4_28196334	4	28196334	8.28316		LOC_Os04g47530
Chr4_28196356	4	28196356	6.02965		LOC_Os04g47530
Chr4_28196395	4	28196395	7.81248		LOC_Os04g47530
Chr4_28196401	4	28196401	6.85078		LOC_Os04g47530
Chr4_28196539	4	28196539	6.065		LOC_Os04g47530
Chr4_28197077	4	28197077	5.91009		LOC_Os04g47530
Chr4_28197090	4	28197090	6.88941		LOC_Os04g47530
Chr4_28197121	4	28197121	5.57349		LOC_Os04g47530
Chr4_28197218	4	28197218	6.41341		LOC_Os04g47530
Chr4_28197461	4	28197461	7.9431		LOC_Os04g47530
Chr4_28197563	4	28197563	7.46344		LOC_Os04g47530
Chr4_28197698	4	28197698	6.04866	LOC_Os04g47550	LOC_Os04g47530
Chr4_28197905	4	28197905	7.19044	LOC_Os04g47550	LOC_Os04g47530
Chr4_28197922	4	28197922	7.02091	LOC_Os04g47550	LOC_Os04g47530
Chr4_28198014	4	28198014	8.48945	LOC_Os04g47550	LOC_Os04g47530
Chr4_28198397	4	28198397	7.14874	LOC_Os04g47550
Chr4_28198783	4	28198783	7.08145	LOC_Os04g47550
Chr4_28199071	4	28199071	7.77989	LOC_Os04g47550
Chr4_28199120	4	28199120	7.91364	LOC_Os04g47550
Chr4_28199274	4	28199274	7.18376	LOC_Os04g47550
Chr4_28200080	4	28200080	6.20551	LOC_Os04g47550
Chr4_28200865	4	28200865	6.24565
Chr4_28200966	4	28200966	7.62709
Chr4_28201027	4	28201027	7.12033
Chr4_28201088	4	28201088	5.68613
Chr4_28201254	4	28201254	6.16622
Chr4_28201319	4	28201319	6.44009
Chr4_28201325	4	28201325	5.57025
Chr4_28201328	4	28201328	5.94692
Chr4_28201343	4	28201343	7.29757
Chr4_28201379	4	28201379	8.96658	LOC_Os04g47555
Chr4_29626871	4	29626871	7.22185		LOC_Os04g49680
Chr4_31212246	4	31212246	5.90658	LOC_Os04g52479
Chr4_31212318	4	31212318	6.18442	LOC_Os04g52479
Chr4_31233588	4	31233588	7.6038
Chr4_31233676	4	31233676	8.54975
Chr4_31235485	4	31235485	6.1261
Chr4_36327	4	36327	6.06601	LOC_Os04g01040
Chr4_8431474	4	8431474	5.75696		LOC_Os04g15510
Chr5_18706976	5	18706976	6.00789
Chr5_197453	5	197453	6.7167		LOC_Os05g01300
Chr5_197455	5	197455	8.47366		LOC_Os05g01300
Chr5_198959	5	198959	5.64016	LOC_Os05g01310	LOC_Os05g01300
Chr5_201955	5	201955	5.56225		LOC_Os05g01310
Chr5_201956	5	201956	5.74232		LOC_Os05g01310
Chr5_210845	5	210845	5.77211		LOC_Os05g01330
Chr5_213738	5	213738	5.54061	LOC_Os05g01350
Chr5_228380	5	228380	5.60555
Chr5_328098	5	328098	5.69037	LOC_Os05g01560
Chr5_332921	5	332921	5.5544
Chr5_333077	5	333077	5.80688
Chr5_333113	5	333113	5.9914
Chr5_333124	5	333124	5.97469
Chr5_335511	5	335511	5.6038
Chr5_335521	5	335521	5.58503
Chr5_336471	5	336471	6.12148
Chr5_7076547	5	7076547	6.38091	LOC_Os05g12310
Chr5_745092	5	745092	6.22113
Chr6_1552859	6	1552859	6.68613
Chr6_1603759	6	1603759	5.5817		LOC_Os06g03960
Chr6_1604765	6	1604765	11.4295		LOC_Os06g03970
Chr6_1605193	6	1605193	8.75449		LOC_Os06g03970
Chr6_1605358	6	1605358	14.0301		LOC_Os06g03970
Chr6_1605936	6	1605936	9.39577	LOC_Os06g03970
Chr6_1606052	6	1606052	10.3224	LOC_Os06g03970
Chr6_1606079	6	1606079	13.4737	LOC_Os06g03970
Chr6_1606181	6	1606181	11.9747	LOC_Os06g03970
Chr6_1606487	6	1606487	12.8013	LOC_Os06g03970
Chr6_1607061	6	1607061	13.752	LOC_Os06g03970
Chr6_1608328	6	1608328	15.1096	LOC_Os06g03970
Chr6_1608540	6	1608540	11.9666	LOC_Os06g03970
Chr6_1610216	6	1610216	8.54821	LOC_Os06g03970
Chr6_1611020	6	1611020	10.3429	LOC_Os06g03970
Chr6_1612527	6	1612527	14.3747
Chr6_1612551	6	1612551	9.63827
Chr6_1612579	6	1612579	8.93554
Chr6_1612613	6	1612613	9.01637
Chr6_1612775	6	1612775	10.0685
Chr6_1613741	6	1613741	14.3747	LOC_Os06g03980
Chr6_1616223	6	1616223	10.618	LOC_Os06g03980
Chr6_1616300	6	1616300	12.0119	LOC_Os06g03980
Chr6_1616416	6	1616416	10.5867	LOC_Os06g03980
Chr6_1616444	6	1616444	12.7375	LOC_Os06g03980
Chr6_1616556	6	1616556	11.04	LOC_Os06g03980
Chr6_1616754	6	1616754	7.86646	LOC_Os06g03980
Chr6_1616862	6	1616862	9.17587	LOC_Os06g03980
Chr6_1617097	6	1617097	11.7328	LOC_Os06g03980
Chr6_1617418	6	1617418	11.1169	LOC_Os06g03980
Chr6_1617816	6	1617816	8.12148	LOC_Os06g03980
Chr6_1618015	6	1618015	12.8894	LOC_Os06g03980
Chr6_1618714	6	1618714	9.92082	LOC_Os06g03980
Chr6_1618777	6	1618777	10.3478	LOC_Os06g03980
Chr6_1619467	6	1619467	10.8447	LOC_Os06g03980
Chr6_1619620	6	1619620	11.3391	LOC_Os06g03980
Chr6_1620068	6	1620068	10.4855	LOC_Os06g03980
Chr6_1620142	6	1620142	14.6126	LOC_Os06g03980
Chr6_1621176	6	1621176	12.5654		LOC_Os06g03980
Chr6_1621186	6	1621186	11.1244		LOC_Os06g03980
Chr6_1621323	6	1621323	12.8447		LOC_Os06g03980
Chr6_1621853	6	1621853	13.4078		LOC_Os06g03980
Chr6_1621951	6	1621951	8.57512		LOC_Os06g03980
Chr6_1621996	6	1621996	7.23136		LOC_Os06g03980
Chr6_1622032	6	1622032	13.4828		LOC_Os06g03980
Chr6_1622264	6	1622264	13.1506
Chr6_1622933	6	1622933	12.5171
Chr6_1623005	6	1623005	13.7328
Chr6_1623243	6	1623243	13.4547
Chr6_1623256	6	1623256	8.5391
Chr6_1623261	6	1623261	6.61798
Chr6_1623289	6	1623289	12.27
Chr6_1623303	6	1623303	7.48149
Chr6_1623443	6	1623443	9.81531
Chr6_1623530	6	1623530	9.99568
Chr6_1623775	6	1623775	9.01233
Chr6_1623846	6	1623846	8.99568
Chr6_1623891	6	1623891	10.6126
Chr6_1623909	6	1623909	13.5884
Chr6_1623964	6	1623964	10.1739
Chr6_1624213	6	1624213	12.2807
Chr6_1624236	6	1624236	10.4498
Chr6_1624271	6	1624271	8.83863
Chr6_1624314	6	1624314	9.10347
Chr6_1624320	6	1624320	8.60906
Chr6_1624451	6	1624451	14.342
Chr6_1624479	6	1624479	10.9208
Chr6_1624497	6	1624497	9.32331
Chr6_1624500	6	1624500	12.2441
Chr6_1624526	6	1624526	10.2321
Chr6_1624537	6	1624537	6.9914
Chr6_1624541	6	1624541	6.54668
Chr6_1624635	6	1624635	11.8633
Chr6_1624642	6	1624642	8.10568
Chr6_1624762	6	1624762	15.6536
Chr6_1624918	6	1624918	13.6757
Chr6_1624946	6	1624946	8.13312
Chr6_1624956	6	1624956	10.163
Chr6_1624963	6	1624963	10.9136
Chr6_1625010	6	1625010	6.15864
Chr6_1625084	6	1625084	11.1952
Chr6_1625124	6	1625124	12.091
Chr6_1625168	6	1625168	15.9547
Chr6_1625178	6	1625178	14.9136
Chr6_1625190	6	1625190	12.6676
Chr6_1625935	6	1625935	13.9547
Chr6_1625996	6	1625996	7.47886
Chr6_1626063	6	1626063	13.6216
Chr6_1626332	6	1626332	12.2882
Chr6_1626348	6	1626348	14.2733
Chr6_1627112	6	1627112	8.9393
Chr6_1628167	6	1628167	10.4724		LOC_Os06g03990
Chr6_1628422	6	1628422	11.0311		LOC_Os06g03990
Chr6_1628937	6	1628937	11.06		LOC_Os06g03990
Chr6_1629391	6	1629391	9.0511		LOC_Os06g03990
Chr6_1629539	6	1629539	13.3536		LOC_Os06g03990
Chr6_1629652	6	1629652	13.8013		LOC_Os06g03990
Chr6_1629828	6	1629828	6.74958	LOC_Os06g03990
Chr6_1629904	6	1629904	10.8601	LOC_Os06g03990
Chr6_1630301	6	1630301	9.29158	LOC_Os06g03990
Chr6_1631020	6	1631020	11.719	LOC_Os06g03990
Chr6_1631244	6	1631244	12.9101	LOC_Os06g03990
Chr6_1631305	6	1631305	12.2076	LOC_Os06g03990
Chr6_1632003	6	1632003	13.4895	LOC_Os06g03990
Chr6_1632138	6	1632138	10.6144	LOC_Os06g03990
Chr6_1633040	6	1633040	13.6757	LOC_Os06g03990
Chr6_1633260	6	1633260	10.2741	LOC_Os06g03990	LOC_Os06g04000
Chr6_1633713	6	1633713	12.2807		LOC_Os06g04000
Chr6_1634284	6	1634284	9.10292		LOC_Os06g04000
Chr6_1634991	6	1634991	11.1427		LOC_Os06g04000
Chr6_1635119	6	1635119	10.8041	LOC_Os06g04000
Chr6_1636045	6	1636045	5.8041
Chr6_1636047	6	1636047	9.67985
Chr6_1636239	6	1636239	14.057
Chr6_1636252	6	1636252	14.2472
Chr6_1636356	6	1636356	11.1129
Chr6_1636847	6	1636847	10.0273	LOC_Os06g04010
Chr6_1637153	6	1637153	11.2464	LOC_Os06g04010
Chr6_1637636	6	1637636	12.1506	LOC_Os06g04010
Chr6_1637921	6	1637921	12	LOC_Os06g04010
Chr6_1638628	6	1638628	13.8601	LOC_Os06g04010
Chr6_1640478	6	1640478	10.983	LOC_Os06g04010
Chr6_1640482	6	1640482	10.9431	LOC_Os06g04010
Chr6_1640830	6	1640830	9.33255	LOC_Os06g04010
Chr6_1640840	6	1640840	10.8729	LOC_Os06g04010
Chr6_1640917	6	1640917	10.9626		LOC_Os06g04010
Chr6_1641135	6	1641135	9.53462		LOC_Os06g04010
Chr6_1641241	6	1641241	7.97469		LOC_Os06g04010
Chr6_1641262	6	1641262	9.88941		LOC_Os06g04010
Chr6_1642041	6	1642041	13.1002		LOC_Os06g04010
Chr6_1642077	6	1642077	11.0119		LOC_Os06g04010
Chr6_1642081	6	1642081	9.18575		LOC_Os06g04010
Chr6_1642103	6	1642103	10.7773		LOC_Os06g04010
Chr6_1642119	6	1642119	6.23284		LOC_Os06g04010
Chr6_1642132	6	1642132	9.92812		LOC_Os06g04010
Chr6_1642149	6	1642149	12.1221		LOC_Os06g04010
Chr6_1642162	6	1642162	5.83863		LOC_Os06g04010
Chr6_1642166	6	1642166	5.51004		LOC_Os06g04010
Chr6_1642234	6	1642234	13.2588	LOC_Os06g04020	LOC_Os06g04010
Chr6_1642266	6	1642266	9.50864	LOC_Os06g04020	LOC_Os06g04010
Chr6_1642528	6	1642528	11.3002	LOC_Os06g04020	LOC_Os06g04010
Chr6_1643634	6	1643634	14.8097	LOC_Os06g04020
Chr6_1643635	6	1643635	14.699	LOC_Os06g04020
Chr6_1643938	6	1643938	10		LOC_Os06g04020
Chr6_1644116	6	1644116	12.7878		LOC_Os06g04020
Chr6_1644378	6	1644378	10.983		LOC_Os06g04020
Chr6_1644446	6	1644446	13.6162		LOC_Os06g04020
Chr6_1644529	6	1644529	13.6778		LOC_Os06g04020
Chr6_1644571	6	1644571	12.8013		LOC_Os06g04020
Chr6_1644579	6	1644579	13.8297		LOC_Os06g04020
Chr6_1644677	6	1644677	12.2628		LOC_Os06g04020
Chr6_1644682	6	1644682	12.0164		LOC_Os06g04020
Chr6_1644751	6	1644751	9.26281		LOC_Os06g04020
Chr6_1644764	6	1644764	11.6576		LOC_Os06g04020
Chr6_1645172	6	1645172	7.05404		LOC_Os06g04020
Chr6_1645214	6	1645214	12.3307		LOC_Os06g04020
Chr6_1645309	6	1645309	11.9626		LOC_Os06g04020
Chr6_1645345	6	1645345	13.6021		LOC_Os06g04020
Chr6_1645459	6	1645459	11.6696	LOC_Os06g04030	LOC_Os06g04020
Chr6_1645806	6	1645806	15.6536	LOC_Os06g04030
Chr6_1646143	6	1646143	11.8477	LOC_Os06g04030
Chr6_1646331	6	1646331	12.6904		LOC_Os06g04030
Chr6_1646469	6	1646469	11.7077		LOC_Os06g04030
Chr6_1646532	6	1646532	12.8386		LOC_Os06g04030
Chr6_1646598	6	1646598	10.4318		LOC_Os06g04030
Chr6_1647085	6	1647085	15.1096		LOC_Os06g04030
Chr6_1647087	6	1647087	14.7496		LOC_Os06g04030
Chr6_1647094	6	1647094	14.02		LOC_Os06g04030
Chr6_1647177	6	1647177	15.9547		LOC_Os06g04030
Chr6_1647185	6	1647185	12.2782		LOC_Os06g04030
Chr6_1647188	6	1647188	13.2644		LOC_Os06g04030
Chr6_1647239	6	1647239	13.3429		LOC_Os06g04030
Chr6_1647427	6	1647427	12.3605		LOC_Os06g04030
Chr6_1647486	6	1647486	15.1765		LOC_Os06g04030
Chr6_1647552	6	1647552	15.6536		LOC_Os06g04030
Chr6_1647602	6	1647602	10.5686		LOC_Os06g04030
Chr6_1647659	6	1647659	14.6126		LOC_Os06g04030
Chr6_1647676	6	1647676	13.752		LOC_Os06g04030
Chr6_1647773	6	1647773	15.6536		LOC_Os06g04030
Chr6_1647943	6	1647943	9.91721		LOC_Os06g04030
Chr6_1647952	6	1647952	10		LOC_Os06g04030
Chr6_1647999	6	1647999	13.3947		LOC_Os06g04030
Chr6_1648960	6	1648960	10	LOC_Os06g04040
Chr6_1649024	6	1649024	12.7986	LOC_Os06g04040
Chr6_1649405	6	1649405	8.65365	LOC_Os06g04040
Chr6_1649960	6	1649960	10.1135	LOC_Os06g04040
Chr6_1650499	6	1650499	14.1284	LOC_Os06g04040
Chr6_1651318	6	1651318	13.9626	LOC_Os06g04040
Chr6_1651588	6	1651588	13.098	LOC_Os06g04040
Chr6_1653092	6	1653092	14.6326	LOC_Os06g04040
Chr6_1653942	6	1653942	12.0414	LOC_Os06g04040
Chr6_1653943	6	1653943	12.0414	LOC_Os06g04040
Chr6_1654064	6	1654064	14.5935	LOC_Os06g04040
Chr6_1654365	6	1654365	13.5784
Chr6_1654369	6	1654369	12.6861
Chr6_1654538	6	1654538	13.9208
Chr6_1654904	6	1654904	11.3028
Chr6_1654954	6	1654954	11.2168
Chr6_1655106	6	1655106	15.9547
Chr6_1655159	6	1655159	14.3215
Chr6_1655229	6	1655229	11.5482
Chr6_1655235	6	1655235	10
Chr6_1655284	6	1655284	10.7144
Chr6_1655447	6	1655447	12.3449
Chr6_1655497	6	1655497	12.1129
Chr6_1655525	6	1655525	7.27165
Chr6_1655527	6	1655527	10
Chr6_1655543	6	1655543	10
Chr6_1655568	6	1655568	5.52288
Chr6_1656046	6	1656046	14.5391
Chr6_1656224	6	1656224	12.067
Chr6_1656245	6	1656245	13.3354
Chr6_1656342	6	1656342	15.3526
Chr6_1656347	6	1656347	14.8097
Chr6_1656538	6	1656538	10
Chr6_1656541	6	1656541	13.1831
Chr6_1656674	6	1656674	13.6655
Chr6_1656871	6	1656871	12.9393
Chr6_1657404	6	1657404	10.6925
Chr6_1657445	6	1657445	14.6536
Chr6_1657473	6	1657473	11.2269
Chr6_1657659	6	1657659	15.4776
Chr6_1657666	6	1657666	12.5735
Chr6_1657731	6	1657731	14.9136
Chr6_1657757	6	1657757	15.3526
Chr6_1657844	6	1657844	15.9547
Chr6_1658262	6	1658262	14.4776
Chr6_1658287	6	1658287	13.3188
Chr6_1658336	6	1658336	13.2255
Chr6_1658453	6	1658453	13.9136
Chr6_1658471	6	1658471	12.6289
Chr6_1658488	6	1658488	13.2182
Chr6_1658641	6	1658641	12.3261
Chr6_1659353	6	1659353	15.2557
Chr6_1659647	6	1659647	15.9547
Chr6_1659667	6	1659667	10.3458
Chr6_1659700	6	1659700	13.5346
Chr6_1659757	6	1659757	15.6536
Chr6_1659789	6	1659789	15.6536
Chr6_1659942	6	1659942	14.2472
Chr6_1659991	6	1659991	10.4145
Chr6_1660291	6	1660291	10.2588
Chr6_1660310	6	1660310	15.1765
Chr6_1660357	6	1660357	14.4498
Chr6_1660359	6	1660359	9.57349
Chr6_1660474	6	1660474	10
Chr6_1660746	6	1660746	9.1343
Chr6_1660866	6	1660866	14.7235
Chr6_1661240	6	1661240	9.77469
Chr6_1661287	6	1661287	15.2557
Chr6_1661829	6	1661829	15.1765
Chr6_1662090	6	1662090	14.9136
Chr6_1662107	6	1662107	14.8761
Chr6_1662157	6	1662157	12.8861
Chr6_1662272	6	1662272	9.44855
Chr6_1662291	6	1662291	9.9914
Chr6_1662458	6	1662458	11.7258
Chr6_1662763	6	1662763	12.4389
Chr6_1662780	6	1662780	10.5361
Chr6_1662990	6	1662990	12.3288
Chr6_1663253	6	1663253	13.6498
Chr6_1663314	6	1663314	8.92812
Chr6_1663367	6	1663367	8.51004
Chr6_1663496	6	1663496	14.9547
Chr6_1663507	6	1663507	8.75945
Chr6_1663758	6	1663758	9.85699
Chr6_1663867	6	1663867	8.85078
Chr6_1664035	6	1664035	15.9547
Chr6_1664186	6	1664186	13.3152
Chr6_1664318	6	1664318	6.14569
Chr6_1664376	6	1664376	13.9031
Chr6_1664385	6	1664385	6.09313
Chr6_1664406	6	1664406	6.37469
Chr6_1664631	6	1664631	15.0004
Chr6_1664941	6	1664941	11.5591
Chr6_1665555	6	1665555	11.5272
Chr6_1665559	6	1665559	11.0381
Chr6_1665566	6	1665566	12.1273
Chr6_1665870	6	1665870	6.20273
Chr6_1665998	6	1665998	11.9469		LOC_Os06g04060
Chr6_1666000	6	1666000	11.4123		LOC_Os06g04060
Chr6_1666013	6	1666013	11.5003		LOC_Os06g04060
Chr6_1666140	6	1666140	15.2557		LOC_Os06g04060
Chr6_1666141	6	1666141	15.0004		LOC_Os06g04060
Chr6_1666540	6	1666540	13.5317		LOC_Os06g04060
Chr6_1666551	6	1666551	11.7932		LOC_Os06g04060
Chr6_1666567	6	1666567	12.6459		LOC_Os06g04060
Chr6_1666570	6	1666570	11.2426		LOC_Os06g04060
Chr6_1666603	6	1666603	12.1068		LOC_Os06g04060
Chr6_1666678	6	1666678	14.0004		LOC_Os06g04060
Chr6_1666751	6	1666751	15.0516		LOC_Os06g04060
Chr6_1666920	6	1666920	13.983		LOC_Os06g04060
Chr6_1667668	6	1667668	11.7825		LOC_Os06g04060
Chr6_1668417	6	1668417	13.8861	LOC_Os06g04060
Chr6_1668603	6	1668603	11.9957	LOC_Os06g04060
Chr6_1669087	6	1669087	13.9066	LOC_Os06g04060
Chr6_1669137	6	1669137	11.2366	LOC_Os06g04060
Chr6_1669314	6	1669314	15.4776	LOC_Os06g04060
Chr6_1669353	6	1669353	11.9281	LOC_Os06g04060
Chr6_1669545	6	1669545	12.8386	LOC_Os06g04060
Chr6_1669653	6	1669653	13.3625	LOC_Os06g04060
Chr6_1669858	6	1669858	12.1871	LOC_Os06g04060
Chr6_1670262	6	1670262	12.8697	LOC_Os06g04060
Chr6_1670560	6	1670560	11.3809	LOC_Os06g04060
Chr6_1671234	6	1671234	10.3788
Chr6_1671382	6	1671382	13.5751
Chr6_1671677	6	1671677	11.0691
Chr6_1671803	6	1671803	12.1772
Chr6_1671840	6	1671840	15.2557
Chr6_1671864	6	1671864	12.9172
Chr6_1671898	6	1671898	12.821
Chr6_1671938	6	1671938	12.3401
Chr6_1672070	6	1672070	13.6946
Chr6_1672380	6	1672380	10.8697
Chr6_1672407	6	1672407	11.1267
Chr6_1672704	6	1672704	14.1986
Chr6_1673229	6	1673229	13.9788
Chr6_1673709	6	1673709	7.31069
Chr6_1673714	6	1673714	7.6517
Chr6_1673718	6	1673718	7.7122
Chr6_1673721	6	1673721	9.92445
Chr6_1673770	6	1673770	6.9393
Chr6_1673803	6	1673803	10.8447
Chr6_1673808	6	1673808	5.92812
Chr6_1674540	6	1674540	9.42597	LOC_Os06g04070
Chr6_1674545	6	1674545	9.41908	LOC_Os06g04070
Chr6_1678213	6	1678213	11.3625		LOC_Os06g04070
Chr6_1678391	6	1678391	10.7077		LOC_Os06g04070
Chr6_1678478	6	1678478	12.3788		LOC_Os06g04070
Chr6_1678577	6	1678577	13.1221		LOC_Os06g04070
Chr6_1679091	6	1679091	5.94692		LOC_Os06g04070
Chr6_1679430	6	1679430	10.7305
Chr6_1679447	6	1679447	5.81816
Chr6_1679642	6	1679642	6.89279
Chr6_1679648	6	1679648	11.8794
Chr6_1679661	6	1679661	7.45223
Chr6_1679798	6	1679798	13.3363
Chr6_1679886	6	1679886	6.06702
Chr6_1679898	6	1679898	11.2924
Chr6_1679904	6	1679904	6.74715
Chr6_1679907	6	1679907	11.3002
Chr6_1679921	6	1679921	12.7773
Chr6_1679943	6	1679943	12.5969
Chr6_1680418	6	1680418	5.97469
Chr6_1680939	6	1680939	8.85078
Chr6_1680943	6	1680943	8.27572
Chr6_1681005	6	1681005	11.6402
Chr6_1681041	6	1681041	11.684
Chr6_1681281	6	1681281	12.7077
Chr6_1681467	6	1681467	11.8239
Chr6_1681542	6	1681542	8.09854
Chr6_1681580	6	1681580	11.0438
Chr6_1681604	6	1681604	9.43415
Chr6_1681676	6	1681676	12.4067
Chr6_1681684	6	1681684	6.28904
Chr6_1681959	6	1681959	11.1314
Chr6_1682253	6	1682253	9.74958
Chr6_1682321	6	1682321	11.3143
Chr6_1682341	6	1682341	10.4001
Chr6_1682391	6	1682391	11.5935
Chr6_1682401	6	1682401	11.2636
Chr6_1682459	6	1682459	14.4237
Chr6_1682525	6	1682525	12.6882
Chr6_1682563	6	1682563	12.2262
Chr6_1682730	6	1682730	13.8041
Chr6_1682914	6	1682914	11.8601
Chr6_1683115	6	1683115	11.2388
Chr6_1684390	6	1684390	5.8729
Chr6_1684407	6	1684407	5.51286
Chr6_1684543	6	1684543	10.2798
Chr6_1684625	6	1684625	13.1101
Chr6_1684661	6	1684661	12.1221
Chr6_1684784	6	1684784	6.49757
Chr6_1684888	6	1684888	5.54363
Chr6_1684894	6	1684894	11.6635
Chr6_1684979	6	1684979	11.5186
Chr6_1685030	6	1685030	12.7033
Chr6_1685715	6	1685715	13.1952
Chr6_1685917	6	1685917	12.475
Chr6_1686140	6	1686140	6.21824
Chr6_1686162	6	1686162	6.34199
Chr6_1686505	6	1686505	12.3958
Chr6_1686529	6	1686529	5.94692
Chr6_1686655	6	1686655	10.2495
Chr6_1686955	6	1686955	12.5272
Chr6_1687237	6	1687237	12.0841
Chr6_1687864	6	1687864	11.1463
Chr6_1687944	6	1687944	11.7595
Chr6_1687961	6	1687961	11.4935
Chr6_1688190	6	1688190	7.96658
Chr6_1688203	6	1688203	5.55909
Chr6_1688265	6	1688265	13.6216
Chr6_1688271	6	1688271	13.5513
Chr6_1688287	6	1688287	14.4498
Chr6_1688289	6	1688289	8.63264
Chr6_1688826	6	1688826	12.719
Chr6_1688913	6	1688913	12.3072
Chr6_1689247	6	1689247	9.59007
Chr6_1689309	6	1689309	10.3655
Chr6_1689324	6	1689324	11.4056
Chr6_1689366	6	1689366	9.79048
Chr6_1689373	6	1689373	9.2644
Chr6_1689456	6	1689456	10.5867
Chr6_1689484	6	1689484	12.2403
Chr6_1689552	6	1689552	8.90658
Chr6_1689632	6	1689632	14.699
Chr6_1689652	6	1689652	11.2652
Chr6_1689704	6	1689704	12.0975
Chr6_1689974	6	1689974	11.1593		LOC_Os06g04080
Chr6_1690221	6	1690221	9.67985		LOC_Os06g04080
Chr6_1690427	6	1690427	10.3325		LOC_Os06g04080
Chr6_1690605	6	1690605	11.4921		LOC_Os06g04080
Chr6_1690843	6	1690843	11.2676		LOC_Os06g04080
Chr6_1691449	6	1691449	11.699		LOC_Os06g04080
Chr6_1691751	6	1691751	11.5544		LOC_Os06g04080
Chr6_1692963	6	1692963	12.1163	LOC_Os06g04080
Chr6_1693088	6	1693088	11.5157	LOC_Os06g04080
Chr6_1693320	6	1693320	10.2097	LOC_Os06g04080
Chr6_1693411	6	1693411	12.2343	LOC_Os06g04080
Chr6_1693594	6	1693594	10.8928	LOC_Os06g04080
Chr6_1693774	6	1693774	11.2644	LOC_Os06g04080
Chr6_1694076	6	1694076	10.3372	LOC_Os06g04080
Chr6_1694270	6	1694270	9.38828
Chr6_1694291	6	1694291	6.46344
Chr6_1694365	6	1694365	7.20343
Chr6_1694395	6	1694395	9.24872
Chr6_1694400	6	1694400	8.77469
Chr6_1694470	6	1694470	11.1904
Chr6_1694569	6	1694569	10.0074
Chr6_1694583	6	1694583	10.7447
Chr6_1694591	6	1694591	10.4248
Chr6_1694596	6	1694596	11.7595
Chr6_1694640	6	1694640	9.17653
Chr6_1694719	6	1694719	9.80134
Chr6_1694730	6	1694730	9.63264
Chr6_1694761	6	1694761	11.3947
Chr6_1694808	6	1694808	10.9788
Chr6_1694918	6	1694918	10.9586
Chr6_1694922	6	1694922	10.8268
Chr6_1695357	6	1695357	11.5302
Chr6_1695530	6	1695530	10.8894
Chr6_1695984	6	1695984	9.40782
Chr6_1696048	6	1696048	10.9872
Chr6_1696139	6	1696139	11.064
Chr6_1696150	6	1696150	10.2161
Chr6_1696320	6	1696320	10.9788
Chr6_1696692	6	1696692	11.1158
Chr6_1696748	6	1696748	10.6421
Chr6_1696864	6	1696864	11.0048
Chr6_1696947	6	1696947	6.92812
Chr6_1696949	6	1696949	6.72354
Chr6_1697015	6	1697015	10.9245
Chr6_1698496	6	1698496	11.1349
Chr6_1699306	6	1699306	9.10846
Chr6_1699335	6	1699335	9.66354
Chr6_1699399	6	1699399	11.699	LOC_Os06g04090
Chr6_1700377	6	1700377	5.94692	LOC_Os06g04090
Chr6_1701954	6	1701954	8.41005	LOC_Os06g04090
Chr6_1703645	6	1703645	8.93181		LOC_Os06g04090
Chr6_1703886	6	1703886	11.0665		LOC_Os06g04090
Chr6_1704338	6	1704338	8.97881		LOC_Os06g04090
Chr6_1704413	6	1704413	10.0074		LOC_Os06g04090
Chr6_1704949	6	1704949	9.25337
Chr6_1704980	6	1704980	8.63451
Chr6_1705100	6	1705100	10.7747
Chr6_1705457	6	1705457	12.2284
Chr6_1705767	6	1705767	11.7055
Chr6_1706373	6	1706373	12.2168
Chr6_1706518	6	1706518	8.84466
Chr6_1706624	6	1706624	8.2426
Chr6_1706635	6	1706635	8.59176
Chr6_1706759	6	1706759	11.2336
Chr6_1706792	6	1706792	11.9318
Chr6_1706836	6	1706836	10.433
Chr6_1706857	6	1706857	11.5768
Chr6_1706968	6	1706968	11.1018
Chr6_1707246	6	1707246	11.0595
Chr6_1707270	6	1707270	12.567
Chr6_1707710	6	1707710	14.2733
Chr6_1707825	6	1707825	12.3893
Chr6_1707890	6	1707890	13.1261
Chr6_1707982	6	1707982	13.0595
Chr6_1708319	6	1708319	12.5735
Chr6_1708863	6	1708863	10.8239
Chr6_1708959	6	1708959	12.2034
Chr6_1708998	6	1708998	12.3947
Chr6_1717702	6	1717702	13.2692
Chr6_1718075	6	1718075	13.1379
Chr6_1718083	6	1718083	12.857
Chr6_1718135	6	1718135	13.7773
Chr6_1718372	6	1718372	15.6536
Chr6_1718394	6	1718394	15.9547
Chr6_1718534	6	1718534	7.7122
Chr6_1718568	6	1718568	10.2848
Chr6_1718640	6	1718640	13.3224
Chr6_1718792	6	1718792	13.2865
Chr6_1718793	6	1718793	15.1096
Chr6_1718873	6	1718873	8.46597
Chr6_1718880	6	1718880	8.78781
Chr6_1718889	6	1718889	8.82681
Chr6_1718898	6	1718898	7.96658
Chr6_1718908	6	1718908	8.01011
Chr6_1718959	6	1718959	10.1765
Chr6_1719116	6	1719116	12.6364
Chr6_1719633	6	1719633	9.74715
Chr6_1719679	6	1719679	7.46344
Chr6_1719736	6	1719736	11.5918
Chr6_1719740	6	1719740	11.9355
Chr6_1719776	6	1719776	8.39794
Chr6_1719813	6	1719813	13.8928
Chr6_1719886	6	1719886	13.7959
Chr6_1719893	6	1719893	13.1537
Chr6_1719932	6	1719932	13.8477
Chr6_1720357	6	1720357	13.1024
Chr6_1720530	6	1720530	13.6055
Chr6_1720693	6	1720693	12.8761
Chr6_1720723	6	1720723	13.5031
Chr6_1720743	6	1720743	13.6345
Chr6_1720799	6	1720799	13.7825
Chr6_1720821	6	1720821	12.9788
Chr6_1720829	6	1720829	13.6308
Chr6_1721174	6	1721174	12.4214
Chr6_1721559	6	1721559	11.983
Chr6_1721691	6	1721691	13.6326		LOC_Os06g04120
Chr6_1721746	6	1721746	14.2557		LOC_Os06g04120
Chr6_1721748	6	1721748	12.4306		LOC_Os06g04120
Chr6_1721792	6	1721792	13.1175		LOC_Os06g04120
Chr6_1721946	6	1721946	12.1518		LOC_Os06g04120
Chr6_1721947	6	1721947	12.9136		LOC_Os06g04120
Chr6_1721950	6	1721950	13.2306		LOC_Os06g04120
Chr6_1722409	6	1722409	13.7282		LOC_Os06g04120
Chr6_1722462	6	1722462	13.767		LOC_Os06g04120
Chr6_1722973	6	1722973	12.8268		LOC_Os06g04120
Chr6_1723287	6	1723287	8.3439		LOC_Os06g04120
Chr6_1724409	6	1724409	12.4908	LOC_Os06g04120
Chr6_1724657	6	1724657	13.6596	LOC_Os06g04120
Chr6_1725536	6	1725536	13.5719	LOC_Os06g04130
Chr6_1726028	6	1726028	13.4437	LOC_Os06g04130
Chr6_1727629	6	1727629	12.5421	LOC_Os06g04130
Chr6_1727981	6	1727981	14.2733	LOC_Os06g04130
Chr6_1728224	6	1728224	13.4437	LOC_Os06g04130
Chr6_1729156	6	1729156	13.6216	LOC_Os06g04130
Chr6_1730301	6	1730301	14.699		LOC_Os06g04130
Chr6_1730401	6	1730401	12.7011		LOC_Os06g04130
Chr6_1730480	6	1730480	13.5935		LOC_Os06g04130
Chr6_1731028	6	1731028	6.7167		LOC_Os06g04130
Chr6_1731098	6	1731098	13.3915		LOC_Os06g04130
Chr6_1731421	6	1731421	13.4389		LOC_Os06g04130
Chr6_1731652	6	1731652	5.78516		LOC_Os06g04130
Chr6_1731766	6	1731766	7.6925		LOC_Os06g04130
Chr6_1731800	6	1731800	5.98297		LOC_Os06g04130
Chr6_1731808	6	1731808	10		LOC_Os06g04130
Chr6_1731840	6	1731840	6.1707	LOC_Os06g04140	LOC_Os06g04130
Chr6_1732615	6	1732615	6.44249		LOC_Os06g04140
Chr6_1732662	6	1732662	6.77211		LOC_Os06g04140
Chr6_1732822	6	1732822	5.56067		LOC_Os06g04140
Chr6_1732859	6	1732859	8.50031		LOC_Os06g04140
Chr6_1732879	6	1732879	8.20343		LOC_Os06g04140
Chr6_1733332	6	1733332	5.68403		LOC_Os06g04140
Chr6_1733373	6	1733373	6.07314		LOC_Os06g04140
Chr6_1733896	6	1733896	12.7721		LOC_Os06g04140
Chr6_1733911	6	1733911	14.6326		LOC_Os06g04140
Chr6_1733915	6	1733915	13.6596		LOC_Os06g04140
Chr6_1733945	6	1733945	14.8416	LOC_Os06g04150	LOC_Os06g04140
Chr6_1733951	6	1733951	14.1096	LOC_Os06g04150	LOC_Os06g04140
Chr6_1734006	6	1734006	13.3134	LOC_Os06g04150	LOC_Os06g04140
Chr6_1734028	6	1734028	14.301	LOC_Os06g04150	LOC_Os06g04140
Chr6_17344152	6	17344152	5.56067
Chr6_1734460	6	1734460	11.9245	LOC_Os06g04150	LOC_Os06g04140
Chr6_1735897	6	1735897	15.1096		LOC_Os06g04150
Chr6_1735928	6	1735928	13.6459		LOC_Os06g04150
Chr6_1735973	6	1735973	13.3251		LOC_Os06g04150
Chr6_1736001	6	1736001	12.0975		LOC_Os06g04150
Chr6_1736235	6	1736235	14.5751		LOC_Os06g04150
Chr6_1736459	6	1736459	10	LOC_Os06g04169	LOC_Os06g04150
Chr6_1736836	6	1736836	12.6289	LOC_Os06g04169	LOC_Os06g04150
Chr6_1736937	6	1736937	14.7235	LOC_Os06g04169	LOC_Os06g04150
Chr6_1736938	6	1736938	15.1765	LOC_Os06g04169	LOC_Os06g04150
Chr6_1737366	6	1737366	15.0516	LOC_Os06g04169
Chr6_1737830	6	1737830	15.0516	LOC_Os06g04169
Chr6_1737975	6	1737975	14.9136	LOC_Os06g04169
Chr6_1738285	6	1738285	15.9547	LOC_Os06g04169
Chr6_1738375	6	1738375	15.0004	LOC_Os06g04169
Chr6_1738545	6	1738545	14.0975	LOC_Os06g04169
Chr6_1738560	6	1738560	5.84164	LOC_Os06g04169
Chr6_1738798	6	1738798	13.2343	LOC_Os06g04169
Chr6_1740167	6	1740167	14.2388	LOC_Os06g04169
Chr6_1740194	6	1740194	5.68613	LOC_Os06g04169
Chr6_1740286	6	1740286	6.07366	LOC_Os06g04169
Chr6_1740472	6	1740472	14.9547	LOC_Os06g04169
Chr6_1740733	6	1740733	13.5331	LOC_Os06g04169
Chr6_1740753	6	1740753	14.5072	LOC_Os06g04169
Chr6_1740760	6	1740760	14.4101	LOC_Os06g04169
Chr6_1740777	6	1740777	15.1096	LOC_Os06g04169
Chr6_1741111	6	1741111	11.8729	LOC_Os06g04169
Chr6_1741229	6	1741229	15.6536	LOC_Os06g04169
Chr6_1741863	6	1741863	6.44491	LOC_Os06g04169
Chr6_1742115	6	1742115	10.5114	LOC_Os06g04169
Chr6_1742118	6	1742118	11.0711	LOC_Os06g04169
Chr6_1742656	6	1742656	11.4763		LOC_Os06g04169
Chr6_1743153	6	1743153	14.0301		LOC_Os06g04169
Chr6_1743262	6	1743262	5.75203		LOC_Os06g04169
Chr6_1743386	6	1743386	6.54061		LOC_Os06g04169
Chr6_17442303	6	17442303	5.61439
Chr6_1744863	6	1744863	15.3526
Chr6_1744906	6	1744906	6.1107
Chr6_1745032	6	1745032	15.3526
Chr6_17450570	6	17450570	5.99568
Chr6_1745281	6	1745281	14.0516
Chr6_1745339	6	1745339	13.9431
Chr6_1745426	6	1745426	8.01863
Chr6_1745802	6	1745802	5.56543
Chr6_17459493	6	17459493	6.64975		LOC_Os06g30260
Chr6_1746099	6	1746099	14.9136
Chr6_1746328	6	1746328	5.6968
Chr6_1746445	6	1746445	5.53165
Chr6_1746820	6	1746820	14.7496
Chr6_1746909	6	1746909	13.7959
Chr6_1747015	6	1747015	15.3526
Chr6_1747288	6	1747288	14.5751
Chr6_1747678	6	1747678	14.2916
Chr6_1747787	6	1747787	6.14691
Chr6_1747812	6	1747812	15.6536
Chr6_1747877	6	1747877	14.8097
Chr6_1747878	6	1747878	15.3526
Chr6_1748034	6	1748034	12.4067
Chr6_1748044	6	1748044	14.015
Chr6_1748069	6	1748069	5.92445
Chr6_1748121	6	1748121	14.0625
Chr6_1748149	6	1748149	6.50031
Chr6_1748174	6	1748174	13.7852
Chr6_1748297	6	1748297	14.3526
Chr6_1748346	6	1748346	13.8729
Chr6_1748864	6	1748864	5.62342
Chr6_1748878	6	1748878	13.5918
Chr6_1749045	6	1749045	6.10679
Chr6_1749058	6	1749058	15.6536
Chr6_1749065	6	1749065	10
Chr6_1749072	6	1749072	8.02826
Chr6_1749308	6	1749308	10.0264
Chr6_1749322	6	1749322	15.4776
Chr6_1749339	6	1749339	6.18243
Chr6_1749357	6	1749357	10
Chr6_1749526	6	1749526	6.40894
Chr6_1750423	6	1750423	10
Chr6_1750473	6	1750473	5.80688
Chr6_1750477	6	1750477	15.9547
Chr6_1750486	6	1750486	6.41229
Chr6_1750520	6	1750520	10
Chr6_1750530	6	1750530	6.46597
Chr6_1750531	6	1750531	6.69897
Chr6_1750694	6	1750694	15.1765
Chr6_1750710	6	1750710	9.38195
Chr6_1750761	6	1750761	7.90658
Chr6_1750795	6	1750795	6.05899
Chr6_1750875	6	1750875	8.90309
Chr6_1751301	6	1751301	5.67778
Chr6_1751310	6	1751310	14.7496
Chr6_1751603	6	1751603	15.9547
Chr6_1751718	6	1751718	15.2557
Chr6_1751722	6	1751722	15.6536
Chr6_1751839	6	1751839	15.9547
Chr6_1751846	6	1751846	7.09528
Chr6_1751873	6	1751873	6.36251
Chr6_1751897	6	1751897	12.7721
Chr6_1751903	6	1751903	14.3116
Chr6_1752027	6	1752027	15.3526
Chr6_1752719	6	1752719	5.51713
Chr6_1752762	6	1752762	5.76955
Chr6_1752770	6	1752770	6.74958
Chr6_1752902	6	1752902	15.2557
Chr6_1753447	6	1753447	9.22695
Chr6_1753579	6	1753579	15.6536
Chr6_1754453	6	1754453	10.4962	LOC_Os06g04190
Chr6_1754628	6	1754628	9.02136	LOC_Os06g04190
Chr6_1754634	6	1754634	13.556	LOC_Os06g04190
Chr6_1754741	6	1754741	9.03527	LOC_Os06g04190
Chr6_1754821	6	1754821	10	LOC_Os06g04190
Chr6_1755249	6	1755249	10	LOC_Os06g04190
Chr6_1755368	6	1755368	10	LOC_Os06g04190
Chr6_1755397	6	1755397	10	LOC_Os06g04190
Chr6_1755540	6	1755540	15.4776	LOC_Os06g04190
Chr6_1755645	6	1755645	15.9547	LOC_Os06g04190
Chr6_1755790	6	1755790	14.1096	LOC_Os06g04190
Chr6_1755963	6	1755963	15.4776	LOC_Os06g04190
Chr6_1756071	6	1756071	14.4237	LOC_Os06g04190
Chr6_1756202	6	1756202	15.3526	LOC_Os06g04190
Chr6_1756454	6	1756454	11.5784	LOC_Os06g04190
Chr6_1756742	6	1756742	15.3526	LOC_Os06g04190
Chr6_1757224	6	1757224	15.4776	LOC_Os06g04190
Chr6_1757536	6	1757536	14.3635	LOC_Os06g04190
Chr6_1758039	6	1758039	11.1891	LOC_Os06g04190
Chr6_1758589	6	1758589	14.3526	LOC_Os06g04190
Chr6_1758924	6	1758924	14.1284	LOC_Os06g04190
Chr6_1760250	6	1760250	15.9547	LOC_Os06g04190	LOC_Os06g04195
Chr6_1760469	6	1760469	10.0757	LOC_Os06g04190	LOC_Os06g04195
Chr6_1760551	6	1760551	15.4776	LOC_Os06g04190	LOC_Os06g04195
Chr6_1760566	6	1760566	15.9547	LOC_Os06g04190	LOC_Os06g04195
Chr6_1760683	6	1760683	15.9547	LOC_Os06g04190	LOC_Os06g04195
Chr6_1761002	6	1761002	15.9547		LOC_Os06g04190
Chr6_1761188	6	1761188	15.2557		LOC_Os06g04190
Chr6_1761242	6	1761242	11.8996		LOC_Os06g04190
Chr6_1761264	6	1761264	12.1707		LOC_Os06g04190
Chr6_1761270	6	1761270	13.5287		LOC_Os06g04190
Chr6_1761272	6	1761272	13.3363		LOC_Os06g04190
Chr6_1761318	6	1761318	12.2782		LOC_Os06g04190
Chr6_1761328	6	1761328	12.3036		LOC_Os06g04190
Chr6_1761520	6	1761520	8.38405	LOC_Os06g04195	LOC_Os06g04190
Chr6_1762871	6	1762871	12.0083	LOC_Os06g04195	LOC_Os06g04190
Chr6_1762920	6	1762920	11.5607
Chr6_1762953	6	1762953	8.70997
Chr6_1763052	6	1763052	12.2907
Chr6_1763054	6	1763054	10
Chr6_1763091	6	1763091	13.6968
Chr6_1763233	6	1763233	13.9706
Chr6_1763258	6	1763258	14.1349
Chr6_1763333	6	1763333	13.5467
Chr6_1763343	6	1763343	10.2027
Chr6_1763647	6	1763647	6.74715		LOC_Os06g04200
Chr6_1763992	6	1763992	11.4306		LOC_Os06g04200
Chr6_1763994	6	1763994	12.083		LOC_Os06g04200
Chr6_1763995	6	1763995	11.5591		LOC_Os06g04200
Chr6_1764004	6	1764004	13.9626		LOC_Os06g04200
Chr6_1764008	6	1764008	14.1694		LOC_Os06g04200
Chr6_1764019	6	1764019	10		LOC_Os06g04200
Chr6_1764038	6	1764038	15.9547		LOC_Os06g04200
Chr6_1764042	6	1764042	14.4237		LOC_Os06g04200
Chr6_1764068	6	1764068	15.9547		LOC_Os06g04200
Chr6_1764191	6	1764191	6.06449		LOC_Os06g04200
Chr6_1764224	6	1764224	14.8097		LOC_Os06g04200
Chr6_1764225	6	1764225	10		LOC_Os06g04200
Chr6_1764235	6	1764235	10		LOC_Os06g04200
Chr6_1764499	6	1764499	5.93181		LOC_Os06g04200
Chr6_1764516	6	1764516	15.2557		LOC_Os06g04200
Chr6_1764553	6	1764553	14.4776		LOC_Os06g04200
Chr6_1764564	6	1764564	5.5867		LOC_Os06g04200
Chr6_1764641	6	1764641	15.6536		LOC_Os06g04200
Chr6_1764700	6	1764700	15.6536		LOC_Os06g04200
Chr6_1765415	6	1765415	10		LOC_Os06g04200
Chr6_1765448	6	1765448	10		LOC_Os06g04200
Chr6_1765761	6	1765761	10	LOC_Os06g04200	LOC_Os06g04200
Chr6_1765976	6	1765976	6.58004	LOC_Os06g04200	LOC_Os06g04200
Chr6_1766020	6	1766020	10	LOC_Os06g04200	LOC_Os06g04200
Chr6_1766071	6	1766071	10	LOC_Os06g04200	LOC_Os06g04200
Chr6_1766074	6	1766074	10	LOC_Os06g04200	LOC_Os06g04200
Chr6_1766108	6	1766108	10	LOC_Os06g04200	LOC_Os06g04200
Chr6_1766110	6	1766110	10	LOC_Os06g04200	LOC_Os06g04200
Chr6_1766460	6	1766460	10	LOC_Os06g04200
Chr6_1768795	6	1768795	6.2636	LOC_Os06g04200
Chr6_1769141	6	1769141	10	LOC_Os06g04200
Chr6_1769155	6	1769155	11.2197	LOC_Os06g04200
Chr6_1769202	6	1769202	10	LOC_Os06g04200
Chr6_1769205	6	1769205	10	LOC_Os06g04200
Chr6_1769211	6	1769211	10	LOC_Os06g04200
Chr6_1769228	6	1769228	10	LOC_Os06g04200
Chr6_1769240	6	1769240	10	LOC_Os06g04200
Chr6_1770024	6	1770024	15.9547	LOC_Os06g04200
Chr6_1770131	6	1770131	15.0516	LOC_Os06g04200
Chr6_1770654	6	1770654	14.8761	LOC_Os06g04200
Chr6_1770672	6	1770672	14.4634
Chr6_1770830	6	1770830	15.1765
Chr6_1770869	6	1770869	14.8761
Chr6_1770873	6	1770873	14.6757
Chr6_1770916	6	1770916	13.9393
Chr6_1770964	6	1770964	15.9547
Chr6_1771015	6	1771015	10
Chr6_1771029	6	1771029	10
Chr6_1771148	6	1771148	15.9547
Chr6_1771154	6	1771154	10
Chr6_1771179	6	1771179	7.06399
Chr6_1771190	6	1771190	10
Chr6_1771468	6	1771468	10
Chr6_1771530	6	1771530	10
Chr6_1771541	6	1771541	11.2111
Chr6_1771576	6	1771576	10
Chr6_1771698	6	1771698	10
Chr6_1771713	6	1771713	10
Chr6_1771843	6	1771843	10
Chr6_1771854	6	1771854	10
Chr6_1771856	6	1771856	10
Chr6_1771870	6	1771870	10
Chr6_1771905	6	1771905	10
Chr6_1771928	6	1771928	10
Chr6_1772514	6	1772514	10
Chr6_1772565	6	1772565	10
Chr6_1772612	6	1772612	10
Chr6_1772653	6	1772653	10
Chr6_1772768	6	1772768	10
Chr6_1772858	6	1772858	10
Chr6_1772859	6	1772859	10
Chr6_1772959	6	1772959	8.70997
Chr6_1772986	6	1772986	8.25493
Chr6_1773027	6	1773027	7.18243
Chr6_1773192	6	1773192	15.9547
Chr6_1773344	6	1773344	10
Chr6_1773488	6	1773488	13.5302
Chr6_1773530	6	1773530	12.063
Chr6_1773741	6	1773741	9.05601
Chr6_1773779	6	1773779	7.70997
Chr6_1773780	6	1773780	7.9431
Chr6_1774015	6	1774015	12.6364
Chr6_1774065	6	1774065	13.1343
Chr6_1774112	6	1774112	13.6556
Chr6_1774124	6	1774124	14.8097
Chr6_1774213	6	1774213	12.3565
Chr6_1774311	6	1774311	10
Chr6_1774722	6	1774722	10
Chr6_1775018	6	1775018	10		LOC_Os06g04210
Chr6_1775022	6	1775022	15.9547		LOC_Os06g04210
Chr6_1775031	6	1775031	12.2534		LOC_Os06g04210
Chr6_1775037	6	1775037	10		LOC_Os06g04210
Chr6_1775050	6	1775050	10		LOC_Os06g04210
Chr6_1775058	6	1775058	10		LOC_Os06g04210
Chr6_1775065	6	1775065	9.2321		LOC_Os06g04210
Chr6_1775070	6	1775070	8.31966		LOC_Os06g04210
Chr6_1775141	6	1775141	10		LOC_Os06g04210
Chr6_1775148	6	1775148	10		LOC_Os06g04210
Chr6_1775222	6	1775222	15.1096		LOC_Os06g04210
Chr6_1775713	6	1775713	15.9547		LOC_Os06g04210
Chr6_1775740	6	1775740	15.9547		LOC_Os06g04210
Chr6_1775796	6	1775796	11.5361		LOC_Os06g04210
Chr6_1775949	6	1775949	10.5421		LOC_Os06g04210
Chr6_1775955	6	1775955	12.71		LOC_Os06g04210
Chr6_1776093	6	1776093	10		LOC_Os06g04210
Chr6_1776123	6	1776123	10		LOC_Os06g04210
Chr6_1776376	6	1776376	10.5086		LOC_Os06g04210
Chr6_1776555	6	1776555	12.5452		LOC_Os06g04210
Chr6_1776579	6	1776579	5.7167		LOC_Os06g04210
Chr6_1776632	6	1776632	13.857		LOC_Os06g04210
Chr6_1776682	6	1776682	9.73283		LOC_Os06g04210
Chr6_1777321	6	1777321	15.9547
Chr6_1777372	6	1777372	10
Chr6_1777598	6	1777598	10
Chr6_1777747	6	1777747	10
Chr6_1779076	6	1779076	10		LOC_Os06g04220
Chr6_1779126	6	1779126	10		LOC_Os06g04220
Chr6_1779134	6	1779134	10		LOC_Os06g04220
Chr6_1779215	6	1779215	9.20482		LOC_Os06g04220
Chr6_1779495	6	1779495	7.47237		LOC_Os06g04220
Chr6_1779545	6	1779545	10		LOC_Os06g04220
Chr6_1779898	6	1779898	10		LOC_Os06g04220
Chr6_1779985	6	1779985	10		LOC_Os06g04220
Chr6_1780088	6	1780088	15.6536		LOC_Os06g04220
Chr6_1780110	6	1780110	10		LOC_Os06g04220
Chr6_1780132	6	1780132	9.55596		LOC_Os06g04220
Chr6_1780142	6	1780142	10		LOC_Os06g04220
Chr6_1780160	6	1780160	10		LOC_Os06g04220
Chr6_1780207	6	1780207	8.95078		LOC_Os06g04220
Chr6_1780246	6	1780246	14.4365		LOC_Os06g04220
Chr6_1780249	6	1780249	15.3526		LOC_Os06g04220
Chr6_1780250	6	1780250	15.6536		LOC_Os06g04220
Chr6_1780252	6	1780252	15.9547		LOC_Os06g04220
Chr6_1780253	6	1780253	15.9547		LOC_Os06g04220
Chr6_1780293	6	1780293	10		LOC_Os06g04220
Chr6_1780336	6	1780336	10		LOC_Os06g04220
Chr6_1780935	6	1780935	10	LOC_Os06g04220
Chr6_1781213	6	1781213	10
Chr6_1781396	6	1781396	10
Chr6_1781412	6	1781412	10
Chr6_1781475	6	1781475	15.1765
Chr6_1781572	6	1781572	10
Chr6_1781952	6	1781952	10
Chr6_1781963	6	1781963	10
Chr6_1782030	6	1782030	10
Chr6_1782072	6	1782072	10
Chr6_1782083	6	1782083	10
Chr6_1782121	6	1782121	10
Chr6_1782151	6	1782151	10
Chr6_1782172	6	1782172	10
Chr6_1782192	6	1782192	15.1765
Chr6_1782236	6	1782236	10
Chr6_1782431	6	1782431	10		LOC_Os06g04230
Chr6_1782566	6	1782566	10		LOC_Os06g04230
Chr6_1782622	6	1782622	10		LOC_Os06g04230
Chr6_1782689	6	1782689	10		LOC_Os06g04230
Chr6_1782840	6	1782840	10		LOC_Os06g04230
Chr6_1782855	6	1782855	10		LOC_Os06g04230
Chr6_1782868	6	1782868	8.54061		LOC_Os06g04230
Chr6_1782869	6	1782869	8.54212		LOC_Os06g04230
Chr6_1782922	6	1782922	10		LOC_Os06g04230
Chr6_1782928	6	1782928	11.4921		LOC_Os06g04230
Chr6_1782930	6	1782930	10		LOC_Os06g04230
Chr6_1782933	6	1782933	10		LOC_Os06g04230
Chr6_1782935	6	1782935	10		LOC_Os06g04230
Chr6_1782942	6	1782942	10		LOC_Os06g04230
Chr6_1782943	6	1782943	10		LOC_Os06g04230
Chr6_1782947	6	1782947	10		LOC_Os06g04230
Chr6_1782963	6	1782963	10		LOC_Os06g04230
Chr6_1782970	6	1782970	10		LOC_Os06g04230
Chr6_1782975	6	1782975	10		LOC_Os06g04230
Chr6_1782982	6	1782982	10		LOC_Os06g04230
Chr6_1782989	6	1782989	10		LOC_Os06g04230
Chr6_1783005	6	1783005	10		LOC_Os06g04230
Chr6_1783038	6	1783038	10		LOC_Os06g04230
Chr6_1783043	6	1783043	10		LOC_Os06g04230
Chr6_1783073	6	1783073	10.8697		LOC_Os06g04230
Chr6_1783075	6	1783075	10		LOC_Os06g04230
Chr6_1783076	6	1783076	10		LOC_Os06g04230
Chr6_1783077	6	1783077	10		LOC_Os06g04230
Chr6_1783082	6	1783082	10		LOC_Os06g04230
Chr6_1783117	6	1783117	15.9547		LOC_Os06g04230
Chr6_1783161	6	1783161	5.79588		LOC_Os06g04230
Chr6_1783206	6	1783206	13.1518		LOC_Os06g04230
Chr6_1783221	6	1783221	15.9547		LOC_Os06g04230
Chr6_1783224	6	1783224	10		LOC_Os06g04230
Chr6_1783268	6	1783268	7.88273		LOC_Os06g04230
Chr6_1783273	6	1783273	10		LOC_Os06g04230
Chr6_1783308	6	1783308	10		LOC_Os06g04230
Chr6_1783324	6	1783324	10		LOC_Os06g04230
Chr6_1783353	6	1783353	14.8097		LOC_Os06g04230
Chr6_1783373	6	1783373	10		LOC_Os06g04230
Chr6_1783378	6	1783378	10		LOC_Os06g04230
Chr6_1783411	6	1783411	15.4776		LOC_Os06g04230
Chr6_1783455	6	1783455	10.327		LOC_Os06g04230
Chr6_1783464	6	1783464	7.28651		LOC_Os06g04230
Chr6_1783496	6	1783496	11.1574		LOC_Os06g04230
Chr6_1783520	6	1783520	14.1986		LOC_Os06g04230
Chr6_1783545	6	1783545	13.52		LOC_Os06g04230
Chr6_1783549	6	1783549	7.23582		LOC_Os06g04230
Chr6_1783614	6	1783614	10		LOC_Os06g04230
Chr6_1783617	6	1783617	15.9547		LOC_Os06g04230
Chr6_1783705	6	1783705	15.1765		LOC_Os06g04230
Chr6_1783773	6	1783773	13.4045		LOC_Os06g04230
Chr6_1783953	6	1783953	7.4318		LOC_Os06g04230
Chr6_1783965	6	1783965	13.9788		LOC_Os06g04230
Chr6_1784089	6	1784089	12.0223		LOC_Os06g04230
Chr6_1784113	6	1784113	13.7375		LOC_Os06g04230
Chr6_1784345	6	1784345	10	LOC_Os06g04230
Chr6_1784528	6	1784528	12.062	LOC_Os06g04230
Chr6_1784882	6	1784882	12.4034
Chr6_1784985	6	1784985	10
Chr6_1785046	6	1785046	10
Chr6_1785235	6	1785235	11.6108	LOC_Os06g04240
Chr6_1785260	6	1785260	10	LOC_Os06g04240
Chr6_1785433	6	1785433	6.18046	LOC_Os06g04240
Chr6_1785875	6	1785875	15.9547	LOC_Os06g04240
Chr6_1785968	6	1785968	8.0278		LOC_Os06g04240
Chr6_1786182	6	1786182	6.23508		LOC_Os06g04240
Chr6_1786490	6	1786490	12.5436		LOC_Os06g04240
Chr6_1786554	6	1786554	10		LOC_Os06g04240
Chr6_1786597	6	1786597	6.45967		LOC_Os06g04240
Chr6_1786682	6	1786682	5.88941		LOC_Os06g04240
Chr6_1786697	6	1786697	13.6778		LOC_Os06g04240
Chr6_1786711	6	1786711	13.6799		LOC_Os06g04240
Chr6_1786758	6	1786758	14.3862		LOC_Os06g04240
Chr6_1786835	6	1786835	9.19314		LOC_Os06g04240
Chr6_1786935	6	1786935	10.2823		LOC_Os06g04240
Chr6_1787003	6	1787003	10.5884		LOC_Os06g04240
Chr6_1787037	6	1787037	10		LOC_Os06g04240
Chr6_1787143	6	1787143	5.79317		LOC_Os06g04240
Chr6_1787149	6	1787149	8.14752		LOC_Os06g04240
Chr6_1787152	6	1787152	6.00393		LOC_Os06g04240
Chr6_1787160	6	1787160	10		LOC_Os06g04240
Chr6_1787195	6	1787195	8.82974		LOC_Os06g04240
Chr6_1787217	6	1787217	10		LOC_Os06g04240
Chr6_1787221	6	1787221	10		LOC_Os06g04240
Chr6_1787223	6	1787223	10		LOC_Os06g04240
Chr6_1787283	6	1787283	12.2487		LOC_Os06g04240
Chr6_1787305	6	1787305	11.9355		LOC_Os06g04240
Chr6_1787306	6	1787306	6.38828		LOC_Os06g04240
Chr6_1787309	6	1787309	5.79588		LOC_Os06g04240
Chr6_1787313	6	1787313	8.40894		LOC_Os06g04240
Chr6_1787322	6	1787322	7.06702		LOC_Os06g04240
Chr6_1787337	6	1787337	5.86967		LOC_Os06g04240
Chr6_1787340	6	1787340	7.61439		LOC_Os06g04240
Chr6_1787343	6	1787343	6.82974		LOC_Os06g04240
Chr6_1787372	6	1787372	9.14569		LOC_Os06g04240
Chr6_1787636	6	1787636	10		LOC_Os06g04240
Chr6_1787641	6	1787641	10		LOC_Os06g04240
Chr6_1788250	6	1788250	12.5528		LOC_Os06g04250
Chr6_1788336	6	1788336	13.3979		LOC_Os06g04250
Chr6_1788384	6	1788384	15.1096		LOC_Os06g04250
Chr6_1788484	6	1788484	15.9547		LOC_Os06g04250
Chr6_1788485	6	1788485	15.6536		LOC_Os06g04250
Chr6_1788519	6	1788519	5.98716		LOC_Os06g04250
Chr6_1788596	6	1788596	11.4647		LOC_Os06g04250
Chr6_1788644	6	1788644	6.24718		LOC_Os06g04250
Chr6_1788706	6	1788706	10		LOC_Os06g04250
Chr6_1788806	6	1788806	9.02872		LOC_Os06g04250
Chr6_1789007	6	1789007	15.4776		LOC_Os06g04250
Chr6_1789245	6	1789245	12.7033		LOC_Os06g04250
Chr6_1789336	6	1789336	14.4498		LOC_Os06g04250
Chr6_1789622	6	1789622	14.7773		LOC_Os06g04250
Chr6_1791219	6	1791219	6.60206	LOC_Os06g04250
Chr6_1791383	6	1791383	6.48945	LOC_Os06g04250
Chr6_1791578	6	1791578	8.19928
Chr6_1791845	6	1791845	10
Chr6_1792217	6	1792217	10
Chr6_1792426	6	1792426	15.2557
Chr6_1792588	6	1792588	10
Chr6_1792589	6	1792589	9.37986
Chr6_1792750	6	1792750	11.699
Chr6_1792792	6	1792792	11.04
Chr6_1793090	6	1793090	10
Chr6_1793193	6	1793193	10
Chr6_1793273	6	1793273	10
Chr6_1793386	6	1793386	10
Chr6_1793572	6	1793572	10
Chr6_1793665	6	1793665	15.4776
Chr6_1793672	6	1793672	13.1918
Chr6_1793712	6	1793712	10
Chr6_1793728	6	1793728	10
Chr6_1793756	6	1793756	10
Chr6_1793775	6	1793775	11.7122
Chr6_1793788	6	1793788	8.51004
Chr6_1793791	6	1793791	10
Chr6_1793947	6	1793947	10
Chr6_1793966	6	1793966	7.38934
Chr6_1793978	6	1793978	15.3526
Chr6_1793998	6	1793998	15.3526
Chr6_1794193	6	1794193	10
Chr6_1794224	6	1794224	10
Chr6_1794316	6	1794316	10
Chr6_1794363	6	1794363	10
Chr6_1794548	6	1794548	10
Chr6_1794586	6	1794586	10
Chr6_1794591	6	1794591	7.67162
Chr6_1794663	6	1794663	10
Chr6_1794827	6	1794827	8.44855
Chr6_1794936	6	1794936	7.73049
Chr6_1794981	6	1794981	6.5867
Chr6_1795798	6	1795798	10
Chr6_1796372	6	1796372	10
Chr6_1796552	6	1796552	10
Chr6_1796720	6	1796720	10
Chr6_1796739	6	1796739	7.75945
Chr6_1796800	6	1796800	10
Chr6_1796819	6	1796819	7.66555
Chr6_1796952	6	1796952	7.86012
Chr6_1797278	6	1797278	6.67985
Chr6_1797452	6	1797452	6.75203
Chr6_1797551	6	1797551	15.9547
Chr6_1798001	6	1798001	10
Chr6_1798053	6	1798053	10
Chr6_1798493	6	1798493	10
Chr6_1798515	6	1798515	7.58503
Chr6_1798756	6	1798756	10
Chr6_1798773	6	1798773	10
Chr6_1798971	6	1798971	8.3439
Chr6_1799565	6	1799565	8.767
Chr6_1799648	6	1799648	7.6925
Chr6_1799707	6	1799707	14.2472
Chr6_1799753	6	1799753	12.8153
Chr6_1799767	6	1799767	13.5143
Chr6_1799802	6	1799802	7.42481
Chr6_1800232	6	1800232	13.4101
Chr6_1800248	6	1800248	8.03105
Chr6_1800538	6	1800538	15.4776
Chr6_1800832	6	1800832	10.6498
Chr6_1800985	6	1800985	9.18642
Chr6_1802192	6	1802192	8.30892
Chr6_1802199	6	1802199	8.43297
Chr6_1802280	6	1802280	7.36957
Chr6_1802483	6	1802483	10.2218
Chr6_1803185	6	1803185	12.5436
Chr6_1803362	6	1803362	8.25259
Chr6_1803374	6	1803374	14.0357
Chr6_1803380	6	1803380	7.42022
Chr6_1803599	6	1803599	6.2161
Chr6_1803760	6	1803760	6.45223
Chr6_1803776	6	1803776	7.63451
[truncated: 672 more rows]

## Sheet: Japonica
Supplementary Table 2: Summary of SNPs associated significantly with glutinous detected in japonica by GWAS mapping
SNP	Chromosome	Position	-LOG10(P)	Gene with signal in ORF	Gene with signal in promoter
Chr1_12184364	1	12184364	5.41117		LOC_Os01g21710
Chr1_12188849	1	12188849	5.44129	LOC_Os01g21720
Chr1_12197481	1	12197481	6.02826
Chr1_12207486	1	12207486	5.47496		LOC_Os01g21750
Chr1_12858114	1	12858114	7.53165
Chr1_13141845	1	13141845	7.98716
Chr1_13404754	1	13404754	5.81248
Chr1_13585842	1	13585842	5.64589		LOC_Os01g24090
Chr1_13586548	1	13586548	5.51286		LOC_Os01g24090
Chr1_13589959	1	13589959	5.80967		LOC_Os01g24100
Chr1_13589986	1	13589986	5.86967		LOC_Os01g24100
Chr1_13600895	1	13600895	5.80967
Chr1_13607535	1	13607535	6.05948
Chr1_13675659	1	13675659	5.75945
Chr1_13675713	1	13675713	5.74715
Chr1_13675766	1	13675766	5.48945
Chr1_13676209	1	13676209	5.83565
Chr1_13689534	1	13689534	5.95861	LOC_Os01g24294
Chr1_13689783	1	13689783	6.63451	LOC_Os01g24294
Chr1_14829594	1	14829594	5.92812
Chr1_15385228	1	15385228	5.42022	LOC_Os01g27570
Chr1_22406401	1	22406401	5.75203	LOC_Os01g39730
Chr1_23276658	1	23276658	5.67778	LOC_Os01g41100
Chr1_24008913	1	24008913	7.20412
Chr1_24045444	1	24045444	6.4437
Chr1_2407217	1	2407217	5.56067	LOC_Os01g05140
Chr1_27706005	1	27706005	5.46597
Chr1_28912838	1	28912838	6.11295		LOC_Os01g50350
Chr1_41848121	1	41848121	7.88941	LOC_Os01g72160
Chr1_7837257	1	7837257	5.767
Chr1_7838691	1	7838691	7.17718		LOC_Os01g13990
Chr1_7847140	1	7847140	5.56225		LOC_Os01g14010
Chr1_7957623	1	7957623	6.24872	LOC_Os01g14200
Chr1_7957879	1	7957879	5.62525	LOC_Os01g14200
Chr1_7965859	1	7965859	5.81531
Chr1_7989428	1	7989428	5.62342	LOC_Os01g14250
Chr1_8954217	1	8954217	5.8041		LOC_Os01g15900
Chr1_8957595	1	8957595	5.63264		LOC_Os01g15910
Chr1_8965585	1	8965585	5.4698	LOC_Os01g15910
Chr1_8982723	1	8982723	6.65365		LOC_Os01g15960
Chr1_8983484	1	8983484	5.6216		LOC_Os01g15960
Chr1_9903969	1	9903969	5.87943		LOC_Os01g17214
Chr1_9907815	1	9907815	5.80688
Chr1_9909089	1	9909089	5.69465
Chr1_9909181	1	9909181	6.58838
Chr1_9909800	1	9909800	5.66555
Chr10_12964063	10	12964063	5.5867	LOC_Os10g25120
Chr10_13716698	10	13716698	7.25026
Chr10_13794321	10	13794321	5.51428
Chr10_21116535	10	21116535	7.88606
Chr11_19960598	11	19960598	5.73518	LOC_Os11g34110
Chr11_21581655	11	21581655	5.6517
Chr11_21581656	11	21581656	6.52143
Chr11_21682157	11	21682157	5.53611	LOC_Os11g36719
Chr11_4964093	11	4964093	5.54821
Chr11_4964094	11	4964094	6.12843
Chr11_4964095	11	4964095	6.90658
Chr11_5113887	11	5113887	6.34679
Chr12_26574439	12	26574439	6.1152
Chr12_3127337	12	3127337	5.48545
Chr12_6556092	12	6556092	5.83565
Chr2_1672618	2	1672618	5.56864		LOC_Os02g03930
Chr2_25009769	2	25009769	6.40894		LOC_Os02g41680
Chr2_25017055	2	25017055	6.05453
Chr2_25033453	2	25033453	5.72125	LOC_Os02g41690
Chr2_25033554	2	25033554	5.48017	LOC_Os02g41690
Chr2_25033985	2	25033985	5.72816	LOC_Os02g41690
Chr2_25035088	2	25035088	6.03198
Chr2_25035154	2	25035154	7.07263
Chr2_25035158	2	25035158	6.70333
Chr2_25035197	2	25035197	5.79048
Chr2_25036549	2	25036549	6.98297	LOC_Os02g41696
Chr2_25039076	2	25039076	5.96658	LOC_Os02g41702	LOC_Os02g41696
Chr2_25039792	2	25039792	5.5817	LOC_Os02g41702
Chr2_25041489	2	25041489	6.05849		LOC_Os02g41702
Chr2_3808242	2	3808242	7.47366
Chr3_13643234	3	13643234	5.58503
Chr3_30191879	3	30191879	5.451		LOC_Os03g52640
Chr3_35276306	3	35276306	6.48812
Chr3_3895119	3	3895119	5.66756	LOC_Os03g07670	LOC_Os03g07660
Chr3_439327	3	439327	5.80967		LOC_Os03g01710
Chr4_19993510	4	19993510	5.64975		LOC_Os04g33030
Chr4_19993511	4	19993511	5.54363		LOC_Os04g33030
Chr4_19996522	4	19996522	5.47496
Chr4_19996536	4	19996536	5.55596
Chr4_19996538	4	19996538	5.56703
Chr4_19996584	4	19996584	5.70774
Chr4_19998021	4	19998021	5.7122
Chr4_19998137	4	19998137	5.40561
Chr4_19998148	4	19998148	5.55596
Chr4_19998154	4	19998154	6.06702
Chr4_19998203	4	19998203	6
Chr4_19998223	4	19998223	6.09366
Chr4_19998327	4	19998327	6.33536
Chr4_19998335	4	19998335	6.47237
Chr4_19998567	4	19998567	6.18709
Chr4_20048947	4	20048947	5.43063
Chr4_20050816	4	20050816	5.86328	LOC_Os04g33120
Chr4_20063419	4	20063419	5.92445	LOC_Os04g33140
Chr4_20797217	4	20797217	5.67572
Chr4_23372076	4	23372076	5.9431	LOC_Os04g39280
Chr4_31374455	4	31374455	5.79588
Chr4_34889748	4	34889748	8.14086
Chr4_4978131	4	4978131	5.80967	LOC_Os04g09360
Chr4_4983702	4	4983702	5.49214	LOC_Os04g09360
Chr4_5023682	4	5023682	5.65758
Chr5_18952349	5	18952349	5.66555
Chr5_18962995	5	18962995	6.10679		LOC_Os05g32470
Chr5_2480073	5	2480073	5.48545		LOC_Os05g05100
Chr5_25479044	5	25479044	6.4437	LOC_Os05g43830
Chr6_1073336	6	1073336	7.81531		LOC_Os06g02920
Chr6_1133629	6	1133629	5.43771
Chr6_1133703	6	1133703	5.71444
Chr6_1133960	6	1133960	6.28819
Chr6_1133962	6	1133962	6.48149
Chr6_1134237	6	1134237	5.48945
Chr6_1134472	6	1134472	5.82974
Chr6_1134752	6	1134752	5.86328
Chr6_1135055	6	1135055	5.46597
Chr6_1135611	6	1135611	5.44733		LOC_Os06g03080
Chr6_1136374	6	1136374	5.50031		LOC_Os06g03080
Chr6_1139338	6	1139338	5.5817
Chr6_1139457	6	1139457	5.73518
Chr6_1139880	6	1139880	5.47625
Chr6_1140278	6	1140278	5.55284
Chr6_1140886	6	1140886	5.82102
Chr6_1141047	6	1141047	5.98297
Chr6_1141057	6	1141057	6.13549
Chr6_1141567	6	1141567	5.65956
Chr6_1141963	6	1141963	6.11464
Chr6_1142015	6	1142015	5.47237
Chr6_1163333	6	1163333	6.02182
Chr6_1216489	6	1216489	5.72354
Chr6_1217228	6	1217228	5.56543
Chr6_1224015	6	1224015	6.18575
Chr6_1224028	6	1224028	5.48545
Chr6_1224090	6	1224090	6.56384
Chr6_1224099	6	1224099	6.34104
Chr6_1224164	6	1224164	6.70553
Chr6_1224201	6	1224201	6.7167
Chr6_1224217	6	1224217	6.54516
Chr6_1224472	6	1224472	6.39794
Chr6_1361268	6	1361268	5.56703		LOC_Os06g03520
Chr6_1385882	6	1385882	6.64207	LOC_Os06g03580
Chr6_1388767	6	1388767	6.4045
Chr6_1397096	6	1397096	6.7167		LOC_Os06g03600
Chr6_1397220	6	1397220	8.28067		LOC_Os06g03600
Chr6_1422493	6	1422493	7.25337		LOC_Os06g03650
Chr6_1432326	6	1432326	5.56225
Chr6_1433007	6	1433007	5.79317		LOC_Os06g03670
Chr6_1450445	6	1450445	5.84164		LOC_Os06g03682
Chr6_1450501	6	1450501	5.48678		LOC_Os06g03682
Chr6_1450516	6	1450516	5.41794		LOC_Os06g03682
Chr6_1450542	6	1450542	5.56864		LOC_Os06g03682
Chr6_1450551	6	1450551	5.60906		LOC_Os06g03682
Chr6_1450576	6	1450576	5.84164		LOC_Os06g03682
Chr6_1450607	6	1450607	5.56225		LOC_Os06g03682
Chr6_1451743	6	1451743	5.51856
Chr6_1454796	6	1454796	6.08197		LOC_Os06g03690
Chr6_1456440	6	1456440	5.6216	LOC_Os06g03690
Chr6_1457847	6	1457847	5.70774	LOC_Os06g03690	LOC_Os06g03700
Chr6_1459158	6	1459158	5.64975		LOC_Os06g03700
Chr6_1459251	6	1459251	5.59007	LOC_Os06g03700
Chr6_1461980	6	1461980	5.72354	LOC_Os06g03700
Chr6_1465866	6	1465866	6.12033	LOC_Os06g03710
Chr6_1472664	6	1472664	5.65956
Chr6_1474092	6	1474092	5.77211
Chr6_1474743	6	1474743	5.80134		LOC_Os06g03740
Chr6_1534968	6	1534968	5.68403
Chr6_1535009	6	1535009	5.60206
Chr6_1605358	6	1605358	8.01773		LOC_Os06g03970
Chr6_1605936	6	1605936	6.77728	LOC_Os06g03970
Chr6_1606052	6	1606052	6.72816	LOC_Os06g03970
Chr6_1606079	6	1606079	7.27409	LOC_Os06g03970
Chr6_1606181	6	1606181	7.28988	LOC_Os06g03970
Chr6_1606487	6	1606487	8.18709	LOC_Os06g03970
Chr6_1607061	6	1607061	6.57349	LOC_Os06g03970
Chr6_1608328	6	1608328	7.17849	LOC_Os06g03970
Chr6_1608540	6	1608540	6.83268	LOC_Os06g03970
Chr6_1612527	6	1612527	7.77989
Chr6_1612551	6	1612551	6.70774
Chr6_1612579	6	1612579	6.7122
Chr6_1612613	6	1612613	6.767
Chr6_1612775	6	1612775	6.74958
Chr6_1613741	6	1613741	7.69465	LOC_Os06g03980
Chr6_1616444	6	1616444	6.53018	LOC_Os06g03980
Chr6_1620142	6	1620142	5.8962	LOC_Os06g03980
Chr6_1621176	6	1621176	7.5986		LOC_Os06g03980
Chr6_1621186	6	1621186	7.50446		LOC_Os06g03980
Chr6_1621323	6	1621323	6.77728		LOC_Os06g03980
Chr6_1621853	6	1621853	7.18111		LOC_Os06g03980
Chr6_1621864	6	1621864	5.73755		LOC_Os06g03980
Chr6_1622032	6	1622032	6.88941		LOC_Os06g03980
Chr6_1622066	6	1622066	10.7932		LOC_Os06g03980
Chr6_1622264	6	1622264	6.82391
Chr6_1622460	6	1622460	5.86328
Chr6_1622869	6	1622869	10
Chr6_1622933	6	1622933	7.93554
Chr6_1623005	6	1623005	6.67778
Chr6_1623243	6	1623243	7.02365
Chr6_1623256	6	1623256	7.37572
Chr6_1623261	6	1623261	7.22403
Chr6_1623289	6	1623289	6.74473
Chr6_1623443	6	1623443	7.08778
Chr6_1623530	6	1623530	7.00568
Chr6_1623775	6	1623775	6.77469
Chr6_1623846	6	1623846	7.12033
Chr6_1623891	6	1623891	6.43063
Chr6_1623909	6	1623909	6.71444
Chr6_1623964	6	1623964	6.90658
Chr6_1624213	6	1624213	8.06449
Chr6_1624236	6	1624236	7.10347
Chr6_1624271	6	1624271	7.08619
Chr6_1624314	6	1624314	5.82681
Chr6_1624320	6	1624320	5.9393
Chr6_1624451	6	1624451	7.42136
Chr6_1624479	6	1624479	7.13018
Chr6_1624497	6	1624497	7.52143
Chr6_1624500	6	1624500	7.57675
Chr6_1624526	6	1624526	6.84164
Chr6_1624541	6	1624541	5.96658
Chr6_1624635	6	1624635	5.81816
Chr6_1624762	6	1624762	7.24949
Chr6_1624918	6	1624918	6.96658
Chr6_1624946	6	1624946	5.48545
Chr6_1624956	6	1624956	8.42136
Chr6_1625168	6	1625168	6.383
Chr6_1625178	6	1625178	6.46852
Chr6_1625190	6	1625190	7.15366
Chr6_1625935	6	1625935	7.46852
Chr6_1626063	6	1626063	7.11407
Chr6_1626348	6	1626348	7.49621
Chr6_1628211	6	1628211	14.214		LOC_Os06g03990
Chr6_1629652	6	1629652	5.86646		LOC_Os06g03990
Chr6_1629904	6	1629904	8.07727	LOC_Os06g03990
Chr6_1631020	6	1631020	8.31426	LOC_Os06g03990
Chr6_1631244	6	1631244	7.09366	LOC_Os06g03990
Chr6_1631305	6	1631305	7.84466	LOC_Os06g03990
Chr6_1633040	6	1633040	8.14388	LOC_Os06g03990
Chr6_1633713	6	1633713	7.72584		LOC_Os06g04000
Chr6_1634284	6	1634284	7.40894		LOC_Os06g04000
Chr6_1634991	6	1634991	8		LOC_Os06g04000
Chr6_1636047	6	1636047	6.66354
Chr6_1636239	6	1636239	7.0752
Chr6_1636252	6	1636252	7.57675
Chr6_1636356	6	1636356	7.98297
Chr6_1637153	6	1637153	7.0511	LOC_Os06g04010
Chr6_1637636	6	1637636	7.05601	LOC_Os06g04010
Chr6_1637921	6	1637921	6.82102	LOC_Os06g04010
Chr6_1638628	6	1638628	8.19044	LOC_Os06g04010
Chr6_1640840	6	1640840	6.17328	LOC_Os06g04010
Chr6_1641135	6	1641135	7.2668		LOC_Os06g04010
Chr6_1641221	6	1641221	5.8729		LOC_Os06g04010
Chr6_1641241	6	1641241	5.7986		LOC_Os06g04010
Chr6_1641262	6	1641262	5.85078		LOC_Os06g04010
Chr6_1642041	6	1642041	6.96658		LOC_Os06g04010
Chr6_1642077	6	1642077	5.95861		LOC_Os06g04010
Chr6_1642103	6	1642103	5.75696		LOC_Os06g04010
Chr6_1642149	6	1642149	6.39362		LOC_Os06g04010
Chr6_1642234	6	1642234	7.64016	LOC_Os06g04020	LOC_Os06g04010
Chr6_1642528	6	1642528	7.00393	LOC_Os06g04020	LOC_Os06g04010
Chr6_1643938	6	1643938	6.4318		LOC_Os06g04020
Chr6_1644116	6	1644116	7.54975		LOC_Os06g04020
Chr6_1644446	6	1644446	8.08407		LOC_Os06g04020
Chr6_1644529	6	1644529	6.31069		LOC_Os06g04020
Chr6_1644571	6	1644571	6.4318		LOC_Os06g04020
Chr6_1644579	6	1644579	6.85699		LOC_Os06g04020
Chr6_1644651	6	1644651	6.02136		LOC_Os06g04020
Chr6_1644751	6	1644751	7.42366		LOC_Os06g04020
Chr6_1645172	6	1645172	5.55129		LOC_Os06g04020
Chr6_1645309	6	1645309	6.63078		LOC_Os06g04020
Chr6_1645345	6	1645345	7.73283		LOC_Os06g04020
Chr6_1645806	6	1645806	6.70115	LOC_Os06g04030
Chr6_1646469	6	1646469	6.82681		LOC_Os06g04030
Chr6_1646532	6	1646532	7.34008		LOC_Os06g04030
Chr6_1647085	6	1647085	6.08938		LOC_Os06g04030
Chr6_1647087	6	1647087	5.56384		LOC_Os06g04030
Chr6_1647094	6	1647094	6.43771		LOC_Os06g04030
Chr6_1647177	6	1647177	7.2652		LOC_Os06g04030
Chr6_1647486	6	1647486	7.92082		LOC_Os06g04030
Chr6_1647552	6	1647552	7.24413		LOC_Os06g04030
Chr6_1647659	6	1647659	6.04191		LOC_Os06g04030
Chr6_1647676	6	1647676	5.67778		LOC_Os06g04030
Chr6_1647773	6	1647773	6.76447		LOC_Os06g04030
Chr6_1648960	6	1648960	7.32057	LOC_Os06g04040
Chr6_1649024	6	1649024	7.34969	LOC_Os06g04040
Chr6_1650499	6	1650499	6.67778	LOC_Os06g04040
Chr6_1651318	6	1651318	7.29757	LOC_Os06g04040
Chr6_1653092	6	1653092	7.06248	LOC_Os06g04040
Chr6_1654064	6	1654064	7.34008	LOC_Os06g04040
Chr6_1654365	6	1654365	6.82681
Chr6_1654904	6	1654904	8.11126
Chr6_1654954	6	1654954	7.39041
Chr6_1655106	6	1655106	6.21968
Chr6_1655229	6	1655229	5.94692
Chr6_1655284	6	1655284	6.54516
Chr6_1655932	6	1655932	5.44249
Chr6_1656018	6	1656018	10
Chr6_1656046	6	1656046	6.14752
Chr6_1656224	6	1656224	7.47366
Chr6_1656245	6	1656245	6.6925
Chr6_1656342	6	1656342	7.27084
Chr6_1656347	6	1656347	7.10791
Chr6_1656538	6	1656538	7.24489
Chr6_1656674	6	1656674	7.75696
Chr6_1657445	6	1657445	7.98297
Chr6_1657659	6	1657659	7.12263
Chr6_1657731	6	1657731	7.25337
Chr6_1657757	6	1657757	7.0348
Chr6_1657844	6	1657844	7.13549
Chr6_1658262	6	1658262	7.78516
Chr6_1658287	6	1658287	7.43652
Chr6_1658336	6	1658336	7.42136
Chr6_1658453	6	1658453	7.39794
Chr6_1659353	6	1659353	7.56067
Chr6_1659647	6	1659647	7.22113
Chr6_1659757	6	1659757	6.81248
Chr6_1659789	6	1659789	7.21467
Chr6_1659942	6	1659942	6.57187
Chr6_1660310	6	1660310	7.81248
Chr6_1660357	6	1660357	6.45842
Chr6_1660474	6	1660474	7.41005
Chr6_1661287	6	1661287	6.84466
Chr6_1661829	6	1661829	7.08884
Chr6_1662090	6	1662090	6.62893
Chr6_1662107	6	1662107	7.17393
Chr6_1662157	6	1662157	6.31426
Chr6_1662291	6	1662291	6.64589
Chr6_1662990	6	1662990	7.52871
Chr6_1663253	6	1663253	6.84164
Chr6_1663496	6	1663496	7.35556
Chr6_1664035	6	1664035	7.36754
Chr6_1664376	6	1664376	5.81248
Chr6_1664631	6	1664631	5.97469
Chr6_1664941	6	1664941	5.42829
Chr6_1665998	6	1665998	5.75203		LOC_Os06g04060
Chr6_1666140	6	1666140	6.01773		LOC_Os06g04060
Chr6_1666141	6	1666141	6.00612		LOC_Os06g04060
Chr6_1666678	6	1666678	5.45346		LOC_Os06g04060
Chr6_1666751	6	1666751	5.4908		LOC_Os06g04060
Chr6_1666920	6	1666920	6.01368		LOC_Os06g04060
Chr6_1669087	6	1669087	5.66354	LOC_Os06g04060
Chr6_1669314	6	1669314	5.53462	LOC_Os06g04060
Chr6_1671840	6	1671840	5.58838
Chr6_1672070	6	1672070	7.21325
Chr6_1672380	6	1672380	5.97469
Chr6_1672407	6	1672407	6.66354
Chr6_1672704	6	1672704	5.84771
Chr6_1673229	6	1673229	5.56067
Chr6_1682874	6	1682874	10
Chr6_1719719	6	1719719	10
Chr6_1731808	6	1731808	10		LOC_Os06g04130
Chr6_1736459	6	1736459	10	LOC_Os06g04169	LOC_Os06g04150
Chr6_1759451	6	1759451	10	LOC_Os06g04190	LOC_Os06g04195
Chr6_1762647	6	1762647	10	LOC_Os06g04195	LOC_Os06g04190
Chr6_1765761	6	1765761	10	LOC_Os06g04200	LOC_Os06g04200
Chr6_1768006	6	1768006	10.1586	LOC_Os06g04200
Chr6_1772858	6	1772858	10
Chr6_1772859	6	1772859	10
Chr6_1772949	6	1772949	10
Chr6_1779126	6	1779126	10		LOC_Os06g04220
Chr6_1785373	6	1785373	6.19246	LOC_Os06g04240
Chr6_1812967	6	1812967	7.71897		LOC_Os06g04270
Chr6_1826635	6	1826635	8.75696		LOC_Os06g04300
Chr6_1862029	6	1862029	5.99568		LOC_Os06g04360
Chr6_1891606	6	1891606	6.79317	LOC_Os06g04410
Chr6_1891718	6	1891718	5.75945	LOC_Os06g04410
Chr6_1891790	6	1891790	5.55284	LOC_Os06g04410
Chr6_1893279	6	1893279	6.09313		LOC_Os06g04410
Chr6_1895104	6	1895104	5.76195		LOC_Os06g04420
Chr6_1895690	6	1895690	6.05404		LOC_Os06g04420
Chr6_1896206	6	1896206	5.72584		LOC_Os06g04420
Chr6_1896871	6	1896871	6.48413		LOC_Os06g04430
Chr6_1896998	6	1896998	6.70115		LOC_Os06g04430
Chr6_1898183	6	1898183	6.8041		LOC_Os06g04440
Chr6_1898317	6	1898317	5.78252		LOC_Os06g04440
Chr6_1898953	6	1898953	7.10403		LOC_Os06g04440
Chr6_1899982	6	1899982	7.17005	LOC_Os06g04440
Chr6_1899985	6	1899985	7.2668	LOC_Os06g04440
Chr6_1900745	6	1900745	7.09151
Chr6_1900772	6	1900772	5.82102
Chr6_1901974	6	1901974	7.34679	LOC_Os06g04450
Chr6_1903456	6	1903456	5.89963	LOC_Os06g04450
Chr6_1906974	6	1906974	6.48678	LOC_Os06g04450
Chr6_1909402	6	1909402	6.04479		LOC_Os06g04450
Chr6_1909552	6	1909552	7.13608		LOC_Os06g04450
Chr6_1916789	6	1916789	5.74715	LOC_Os06g04470
Chr6_1917118	6	1917118	5.97881	LOC_Os06g04470
Chr6_1918407	6	1918407	6.70774		LOC_Os06g04470
Chr6_1918414	6	1918414	6.61439		LOC_Os06g04470
Chr6_1919649	6	1919649	5.83565		LOC_Os06g04470
Chr6_1919685	6	1919685	5.62342		LOC_Os06g04470
Chr6_1919722	6	1919722	5.97881		LOC_Os06g04470
Chr6_1919723	6	1919723	6.08619		LOC_Os06g04470
Chr6_1919754	6	1919754	5.99568		LOC_Os06g04470
Chr6_1919820	6	1919820	6.23582		LOC_Os06g04470
Chr6_1919828	6	1919828	6.04576		LOC_Os06g04470
Chr6_1919850	6	1919850	5.52724		LOC_Os06g04470
Chr6_1919851	6	1919851	5.55596		LOC_Os06g04470
Chr6_1919853	6	1919853	5.61083		LOC_Os06g04470
Chr6_1919857	6	1919857	5.85078		LOC_Os06g04470
Chr6_1919872	6	1919872	5.85699		LOC_Os06g04470
Chr6_1919878	6	1919878	5.74232		LOC_Os06g04470
Chr6_1919893	6	1919893	5.66959		LOC_Os06g04470
Chr6_1919902	6	1919902	5.6925		LOC_Os06g04470
Chr6_1919914	6	1919914	5.95078		LOC_Os06g04470
Chr6_1920003	6	1920003	5.7167		LOC_Os06g04470
Chr6_1921860	6	1921860	10		LOC_Os06g04480
Chr6_1922306	6	1922306	6.64207		LOC_Os06g04480
Chr6_1922323	6	1922323	5.49485		LOC_Os06g04480
Chr6_1922663	6	1922663	5.46218	LOC_Os06g04480
Chr6_1923893	6	1923893	10		LOC_Os06g04490
Chr6_1924548	6	1924548	5.43415		LOC_Os06g04490
Chr6_1924645	6	1924645	5.56225		LOC_Os06g04490
Chr6_1924647	6	1924647	5.59346		LOC_Os06g04490
Chr6_1924655	6	1924655	5.56067		LOC_Os06g04490
Chr6_1924739	6	1924739	5.73049		LOC_Os06g04490
Chr6_1924753	6	1924753	5.4023		LOC_Os06g04490
Chr6_1924963	6	1924963	5.78781	LOC_Os06g04490
Chr6_1925124	6	1925124	5.74232	LOC_Os06g04490
Chr6_1925130	6	1925130	5.74473	LOC_Os06g04490
Chr6_1925134	6	1925134	5.66354	LOC_Os06g04490
Chr6_1925145	6	1925145	5.73755	LOC_Os06g04490
Chr6_1925248	6	1925248	5.93181	LOC_Os06g04490
Chr6_1925269	6	1925269	6.11691	LOC_Os06g04490	LOC_Os06g04500
Chr6_1925464	6	1925464	5.57187		LOC_Os06g04500
Chr6_1925465	6	1925465	5.54212		LOC_Os06g04500
Chr6_1925474	6	1925474	5.43771		LOC_Os06g04500
Chr6_1925478	6	1925478	5.6925		LOC_Os06g04500
Chr6_1925486	6	1925486	5.60906		LOC_Os06g04500
Chr6_1925573	6	1925573	5.47237		LOC_Os06g04500
Chr6_1925773	6	1925773	5.76955		LOC_Os06g04500
Chr6_1925789	6	1925789	5.73993		LOC_Os06g04500
Chr6_1927658	6	1927658	6.23508	LOC_Os06g04500	LOC_Os06g04500
Chr6_1928311	6	1928311	6.9431	LOC_Os06g04500
Chr6_1928553	6	1928553	6.17134	LOC_Os06g04500
Chr6_1928564	6	1928564	6.28316	LOC_Os06g04500
Chr6_1928647	6	1928647	5.54668	LOC_Os06g04500
Chr6_1928767	6	1928767	6.63264	LOC_Os06g04500
Chr6_1928771	6	1928771	6.23062	LOC_Os06g04500
Chr6_1928958	6	1928958	6.39469	LOC_Os06g04500
Chr6_1928986	6	1928986	6.46852	LOC_Os06g04500
Chr6_1928989	6	1928989	6.17393	LOC_Os06g04500
Chr6_1929041	6	1929041	6.74958	LOC_Os06g04500
Chr6_1929548	6	1929548	6.4389	LOC_Os06g04500
Chr6_1929657	6	1929657	6.85387	LOC_Os06g04500
Chr6_1930100	6	1930100	6.284	LOC_Os06g04500
Chr6_1930281	6	1930281	6.57675	LOC_Os06g04500
Chr6_1930441	6	1930441	6.91721	LOC_Os06g04500
Chr6_1930454	6	1930454	6.28651	LOC_Os06g04500
Chr6_1930653	6	1930653	6.28567	LOC_Os06g04500
Chr6_1930880	6	1930880	7.05601	LOC_Os06g04500
Chr6_1931062	6	1931062	6.1152
Chr6_1931185	6	1931185	7.08566
Chr6_1931228	6	1931228	6.98297
Chr6_1931236	6	1931236	10
Chr6_1931238	6	1931238	6.23062
Chr6_1931411	6	1931411	6.28233	LOC_Os06g04510
Chr6_1931797	6	1931797	7.0511	LOC_Os06g04510
Chr6_1932003	6	1932003	6.72125	LOC_Os06g04510
Chr6_1932485	6	1932485	6.3536	LOC_Os06g04510
Chr6_1933006	6	1933006	6.56864	LOC_Os06g04510
Chr6_1933377	6	1933377	6.34486	LOC_Os06g04510
Chr6_1933523	6	1933523	6.82681	LOC_Os06g04510
Chr6_1933538	6	1933538	6.37161	LOC_Os06g04510
Chr6_1933586	6	1933586	6.34679	LOC_Os06g04510
Chr6_1933666	6	1933666	7.06651	LOC_Os06g04510
Chr6_1933775	6	1933775	7.13906	LOC_Os06g04510
Chr6_1933971	6	1933971	6.98716	LOC_Os06g04510
Chr6_1934144	6	1934144	6.41794	LOC_Os06g04510
Chr6_1934250	6	1934250	6.85078	LOC_Os06g04510
Chr6_1934313	6	1934313	7.02091	LOC_Os06g04510
Chr6_1934335	6	1934335	6.90658	LOC_Os06g04510
Chr6_1934338	6	1934338	6.8962	LOC_Os06g04510
Chr6_1934345	6	1934345	6.96257	LOC_Os06g04510
Chr6_1934415	6	1934415	6.93554	LOC_Os06g04510
Chr6_1935197	6	1935197	6.19997	LOC_Os06g04510
Chr6_1935273	6	1935273	6.92082	LOC_Os06g04510
Chr6_1935457	6	1935457	6.35262	LOC_Os06g04510
Chr6_1935482	6	1935482	6.22548	LOC_Os06g04510
Chr6_1935961	6	1935961	6.24872	LOC_Os06g04510	LOC_Os06g04520
Chr6_1935998	6	1935998	6.63264	LOC_Os06g04510	LOC_Os06g04520
Chr6_1936172	6	1936172	6.23732	LOC_Os06g04510	LOC_Os06g04520
Chr6_1936302	6	1936302	7.02826	LOC_Os06g04510	LOC_Os06g04520
Chr6_1936661	6	1936661	7.09474		LOC_Os06g04510
Chr6_1937785	6	1937785	6.55129		LOC_Os06g04510
Chr6_1940913	6	1940913	6.25337	LOC_Os06g04520
Chr6_1943753	6	1943753	6.22841	LOC_Os06g04520
Chr6_1944250	6	1944250	6.3363	LOC_Os06g04520
Chr6_1946651	6	1946651	6.20135	LOC_Os06g04520
Chr6_1947198	6	1947198	6.27084	LOC_Os06g04520
Chr6_1953503	6	1953503	6.27246
Chr6_1954390	6	1954390	6.63078
Chr6_1954571	6	1954571	6.40121
Chr6_1956314	6	1956314	7.04721
Chr6_1956335	6	1956335	6.76447
Chr6_1956350	6	1956350	6.92445
Chr6_1956354	6	1956354	5.73993
Chr6_1956430	6	1956430	6.44491
Chr6_1956439	6	1956439	6.75449
Chr6_1956805	6	1956805	6.64397
Chr6_1956887	6	1956887	5.66154
Chr6_1956922	6	1956922	7.14327
Chr6_1957107	6	1957107	6
Chr6_1957237	6	1957237	5.45842
Chr6_1957273	6	1957273	6.68613
Chr6_1957283	6	1957283	5.75449
Chr6_1957292	6	1957292	5.63827
Chr6_1957299	6	1957299	6.02826
Chr6_1957319	6	1957319	7.86328
Chr6_1957335	6	1957335	5.69465
Chr6_1957388	6	1957388	5.92445
Chr6_1957393	6	1957393	6.97881
Chr6_1957665	6	1957665	5.767
Chr6_1957669	6	1957669	6.90658
Chr6_1958087	6	1958087	5.77728
Chr6_1958226	6	1958226	5.86967
Chr6_1958262	6	1958262	5.83565
Chr6_1958349	6	1958349	6.97062
Chr6_1958362	6	1958362	7.7167
Chr6_1958415	6	1958415	5.59007
Chr6_1958443	6	1958443	5.56864
Chr6_1958485	6	1958485	6.52433
Chr6_1958494	6	1958494	6.58838
Chr6_1958516	6	1958516	6.39041
Chr6_1959949	6	1959949	6.7122
Chr6_1959972	6	1959972	6.0752
Chr6_1959974	6	1959974	5.81248
Chr6_1960151	6	1960151	6.64397
Chr6_1960186	6	1960186	6.75945
Chr6_1960204	6	1960204	6.6968
Chr6_1960271	6	1960271	7.02273
Chr6_1973090	6	1973090	7.37469
Chr6_1989861	6	1989861	5.64016		LOC_Os06g04580
Chr6_2001822	6	2001822	5.5544	LOC_Os06g04600
Chr6_2025525	6	2025525	5.88273	LOC_Os06g04640
Chr6_2032400	6	2032400	10	LOC_Os06g04660
Chr6_2070723	6	2070723	14.5229
Chr6_2094849	6	2094849	6.85078		LOC_Os06g04800
Chr6_2106901	6	2106901	7.05849	LOC_Os06g04830	LOC_Os06g04820
Chr6_2117245	6	2117245	10		LOC_Os06g04840
Chr6_2117684	6	2117684	7.55752		LOC_Os06g04840
Chr6_2211001	6	2211001	10		LOC_Os06g05010
Chr6_2215656	6	2215656	9.04191
Chr6_22207685	6	22207685	6.29328		LOC_Os06g37520
Chr6_2332983	6	2332983	6.96658	LOC_Os06g05190
Chr6_2412740	6	2412740	13.4962	LOC_Os06g05359
Chr6_2435865	6	2435865	9.00833	LOC_Os06g05390
Chr6_2592624	6	2592624	9.8962	LOC_Os06g05750	LOC_Os06g05740
Chr6_3029822	6	3029822	6.20761
Chr6_3088762	6	3088762	5.46092		LOC_Os06g06560
Chr6_3173573	6	3173573	5.65365
Chr6_3173593	6	3173593	6.36051
Chr6_3198634	6	3198634	6.15927	LOC_Os06g06780	LOC_Os06g06790
Chr6_3234539	6	3234539	5.91009	LOC_Os06g06850	LOC_Os06g06840
Chr6_3270307	6	3270307	5.6216	LOC_Os06g06890
Chr6_3270484	6	3270484	5.46471	LOC_Os06g06890
Chr6_3270489	6	3270489	5.46471	LOC_Os06g06890
Chr6_3270510	6	3270510	6.30452	LOC_Os06g06890
Chr6_3270743	6	3270743	5.56703	LOC_Os06g06890
Chr6_3271472	6	3271472	6.01189		LOC_Os06g06900
Chr6_3271724	6	3271724	5.45967		LOC_Os06g06900
Chr6_3272558	6	3272558	5.80967		LOC_Os06g06900
Chr6_3275888	6	3275888	5.62342	LOC_Os06g06900	LOC_Os06g06910
Chr6_3276274	6	3276274	5.62893	LOC_Os06g06900	LOC_Os06g06910
Chr6_3276313	6	3276313	5.50169	LOC_Os06g06900	LOC_Os06g06910
Chr6_3280058	6	3280058	5.59346
Chr6_3280661	6	3280661	6.20204
Chr6_3282902	6	3282902	5.77211	LOC_Os06g06920
Chr6_3283103	6	3283103	5.69897	LOC_Os06g06920
Chr6_3283430	6	3283430	5.76955	LOC_Os06g06920
Chr6_3286834	6	3286834	5.71897	LOC_Os06g06930	LOC_Os06g06920
Chr6_3287636	6	3287636	5.42481	LOC_Os06g06930	LOC_Os06g06920
Chr6_3288026	6	3288026	5.58004	LOC_Os06g06930
Chr6_3288770	6	3288770	5.44249	LOC_Os06g06930
Chr6_3289244	6	3289244	5.55752		LOC_Os06g06930
Chr6_3289864	6	3289864	6.08831		LOC_Os06g06930
Chr6_3289963	6	3289963	6.1945		LOC_Os06g06930
Chr6_3289983	6	3289983	5.49214		LOC_Os06g06930
Chr6_3290167	6	3290167	5.74715		LOC_Os06g06930
Chr6_3291359	6	3291359	6.73283
Chr6_3292123	6	3292123	5.46344
Chr6_3294630	6	3294630	5.61261	LOC_Os06g06940
Chr6_3294770	6	3294770	5.88941	LOC_Os06g06940
Chr6_3295685	6	3295685	6.48017	LOC_Os06g06940
Chr6_3295705	6	3295705	7.31785	LOC_Os06g06940
Chr6_3295707	6	3295707	7.31785	LOC_Os06g06940
Chr6_3295720	6	3295720	6.9431	LOC_Os06g06940
Chr6_3295723	6	3295723	6.80967	LOC_Os06g06940
Chr6_3295838	6	3295838	5.70774	LOC_Os06g06940
Chr6_3296063	6	3296063	7.22988	LOC_Os06g06940
Chr6_3296126	6	3296126	7.52578	LOC_Os06g06940
Chr6_3296130	6	3296130	5.74232	LOC_Os06g06940
Chr6_3296143	6	3296143	7.09691	LOC_Os06g06940
Chr6_3296235	6	3296235	7.44855	LOC_Os06g06940
Chr6_3296336	6	3296336	7.09583	LOC_Os06g06940
Chr6_3296349	6	3296349	6.22403	LOC_Os06g06940
Chr6_3296351	6	3296351	6.2652	LOC_Os06g06940
Chr6_3296426	6	3296426	6.51999		LOC_Os06g06940
Chr6_3296444	6	3296444	6.35556		LOC_Os06g06940
Chr6_3296605	6	3296605	9.22113		LOC_Os06g06940
Chr6_3296627	6	3296627	8.34969		LOC_Os06g06940
Chr6_3296694	6	3296694	7.06956		LOC_Os06g06940
Chr6_3296753	6	3296753	6.6517		LOC_Os06g06940
Chr6_3296898	6	3296898	6.93554		LOC_Os06g06940
Chr6_3296923	6	3296923	8.14509		LOC_Os06g06940
Chr6_3296925	6	3296925	8.83863		LOC_Os06g06940
Chr6_3296930	6	3296930	7.75945		LOC_Os06g06940
Chr6_3296968	6	3296968	5.74473		LOC_Os06g06940
Chr6_3296970	6	3296970	5.97469		LOC_Os06g06940
Chr6_3296976	6	3296976	6.84771		LOC_Os06g06940
Chr6_3296984	6	3296984	6.09151		LOC_Os06g06940
Chr6_3296985	6	3296985	6.97881		LOC_Os06g06940
Chr6_3297034	6	3297034	7.27491		LOC_Os06g06940
Chr6_3297038	6	3297038	7.51999		LOC_Os06g06940
Chr6_3297039	6	3297039	7.27491		LOC_Os06g06940
Chr6_3297059	6	3297059	7.41567		LOC_Os06g06940
Chr6_3297147	6	3297147	7.31605		LOC_Os06g06940
Chr6_3297203	6	3297203	7.29585		LOC_Os06g06940
Chr6_3297290	6	3297290	7.50031		LOC_Os06g06940
Chr6_3297295	6	3297295	7.40894		LOC_Os06g06940
Chr6_3297315	6	3297315	9.266		LOC_Os06g06940
Chr6_3297360	6	3297360	6.767		LOC_Os06g06940
Chr6_3297388	6	3297388	6.6968		LOC_Os06g06940
Chr6_3297419	6	3297419	7.05159		LOC_Os06g06940
Chr6_3297452	6	3297452	6.19928		LOC_Os06g06940
Chr6_3297466	6	3297466	7.51856		LOC_Os06g06940
Chr6_3297470	6	3297470	7.17914		LOC_Os06g06940
Chr6_3297476	6	3297476	6.5391		LOC_Os06g06940
Chr6_3297483	6	3297483	6.76447		LOC_Os06g06940
Chr6_3297505	6	3297505	6.77469		LOC_Os06g06940
Chr6_3297530	6	3297530	7.57349		LOC_Os06g06940
Chr6_3297534	6	3297534	7.58336		LOC_Os06g06940
Chr6_3297545	6	3297545	7.68613		LOC_Os06g06940
Chr6_3297562	6	3297562	8.88606		LOC_Os06g06940
Chr6_3297565	6	3297565	8.64397		LOC_Os06g06940
Chr6_3297669	6	3297669	6.16115		LOC_Os06g06940
Chr6_3297678	6	3297678	6.9914		LOC_Os06g06940
Chr6_3297683	6	3297683	6.76955		LOC_Os06g06940
Chr6_3297686	6	3297686	6.0942		LOC_Os06g06940
Chr6_3297697	6	3297697	5.59517		LOC_Os06g06940
Chr6_3297715	6	3297715	6.37161		LOC_Os06g06940
Chr6_3297731	6	3297731	5.66354		LOC_Os06g06940
Chr6_3297738	6	3297738	5.90309		LOC_Os06g06940
Chr6_3297739	6	3297739	6.11126		LOC_Os06g06940
Chr6_3297773	6	3297773	5.46852		LOC_Os06g06940
Chr6_3297790	6	3297790	6.84466		LOC_Os06g06940
Chr6_3297846	6	3297846	7.72816		LOC_Os06g06940
Chr6_3297867	6	3297867	7.79048		LOC_Os06g06940
Chr6_3297913	6	3297913	8.00305		LOC_Os06g06940
Chr6_3297928	6	3297928	6.4045		LOC_Os06g06940
Chr6_3298003	6	3298003	7.32606		LOC_Os06g06940
Chr6_3298018	6	3298018	6.14569		LOC_Os06g06940
Chr6_3298020	6	3298020	5.4828		LOC_Os06g06940
Chr6_3298046	6	3298046	7.52288		LOC_Os06g06940
Chr6_3298141	6	3298141	7.62342		LOC_Os06g06940
Chr6_3298194	6	3298194	6.73993		LOC_Os06g06940
Chr6_3298370	6	3298370	7.94692
Chr6_3298448	6	3298448	7.74958
Chr6_3298454	6	3298454	5.65956
Chr6_3298457	6	3298457	7.43415
Chr6_3299218	6	3299218	6.02319
Chr6_3301109	6	3301109	7.29243
Chr6_3301110	6	3301110	7.2204
Chr6_3301406	6	3301406	6.07212	LOC_Os06g06950
Chr6_3301418	6	3301418	7.08831	LOC_Os06g06950
Chr6_3301509	6	3301509	6.84466	LOC_Os06g06950
Chr6_3301513	6	3301513	7.4908	LOC_Os06g06950
Chr6_3301522	6	3301522	6.65365	LOC_Os06g06950
Chr6_3301544	6	3301544	7.83268	LOC_Os06g06950
Chr6_3301551	6	3301551	7.55129	LOC_Os06g06950
Chr6_3301573	6	3301573	7.29843	LOC_Os06g06950
Chr6_3301655	6	3301655	5.89963	LOC_Os06g06950
Chr6_3301848	6	3301848	7.07263	LOC_Os06g06950
Chr6_3301855	6	3301855	7.007	LOC_Os06g06950
Chr6_3301906	6	3301906	7.5784	LOC_Os06g06950
Chr6_3301922	6	3301922	7.34294	LOC_Os06g06950
Chr6_3301924	6	3301924	7.59517	LOC_Os06g06950
Chr6_3302036	6	3302036	6.12901	LOC_Os06g06950
Chr6_3302038	6	3302038	8.04096	LOC_Os06g06950
Chr6_3302131	6	3302131	6.8962	LOC_Os06g06950
Chr6_3302179	6	3302179	7.03621	LOC_Os06g06950
Chr6_3302185	6	3302185	6.9914	LOC_Os06g06950
Chr6_3302194	6	3302194	6.74473	LOC_Os06g06950
Chr6_3302219	6	3302219	7.19518	LOC_Os06g06950
Chr6_3302222	6	3302222	7.19518	LOC_Os06g06950
Chr6_3302279	6	3302279	7.02503	LOC_Os06g06950
Chr6_3302280	6	3302280	7.10679	LOC_Os06g06950
Chr6_3302501	6	3302501	7.0278	LOC_Os06g06950
Chr6_3302531	6	3302531	7.13253	LOC_Os06g06950
Chr6_3302538	6	3302538	7.13906	LOC_Os06g06950
Chr6_3302629	6	3302629	6.36856	LOC_Os06g06950
Chr6_3302656	6	3302656	6.9393	LOC_Os06g06950
Chr6_3302669	6	3302669	5.5867	LOC_Os06g06950
Chr6_3302791	6	3302791	7.18243	LOC_Os06g06950
Chr6_3302810	6	3302810	6.44733	LOC_Os06g06950
Chr6_3302957	6	3302957	6.57349	LOC_Os06g06950
Chr6_3303171	6	3303171	5.42829		LOC_Os06g06950
Chr6_3303610	6	3303610	9.37161		LOC_Os06g06950
Chr6_3303616	6	3303616	8.45967		LOC_Os06g06950
Chr6_3303617	6	3303617	8.48545		LOC_Os06g06950
Chr6_3303624	6	3303624	9.92445		LOC_Os06g06950
Chr6_3303656	6	3303656	10.7258		LOC_Os06g06950
Chr6_3303663	6	3303663	12		LOC_Os06g06950
Chr6_3303668	6	3303668	12.2487		LOC_Os06g06950
Chr6_3303803	6	3303803	6.93181		LOC_Os06g06950
Chr6_3303813	6	3303813	7.24336		LOC_Os06g06950
Chr6_3303821	6	3303821	6.66555		LOC_Os06g06950
Chr6_3303824	6	3303824	5.41567		LOC_Os06g06950
Chr6_3303831	6	3303831	6.97062		LOC_Os06g06950
Chr6_3303838	6	3303838	6.7986		LOC_Os06g06950
Chr6_3303899	6	3303899	8.43297		LOC_Os06g06950
Chr6_3304182	6	3304182	8.70997		LOC_Os06g06950
Chr6_3304200	6	3304200	7.63639		LOC_Os06g06950
Chr6_3304272	6	3304272	5.63451		LOC_Os06g06950
Chr6_3304392	6	3304392	6.39254		LOC_Os06g06950
Chr6_3304494	6	3304494	7.19179		LOC_Os06g06950
Chr6_3304751	6	3304751	5.4828		LOC_Os06g06950
Chr6_3304790	6	3304790	6.29158		LOC_Os06g06950
Chr6_3304939	6	3304939	6.54212		LOC_Os06g06950
Chr6_3304989	6	3304989	5.6925		LOC_Os06g06950
Chr6_3304990	6	3304990	7.38195		LOC_Os06g06950
Chr6_3305019	6	3305019	7.5986		LOC_Os06g06950
Chr6_3305065	6	3305065	7.34679		LOC_Os06g06950
Chr6_3305138	6	3305138	6.48945		LOC_Os06g06950
Chr6_3305214	6	3305214	6.81248	LOC_Os06g06960
Chr6_3305234	6	3305234	7.23657	LOC_Os06g06960
Chr6_3305289	6	3305289	6.64782	LOC_Os06g06960
Chr6_3305320	6	3305320	7.64016	LOC_Os06g06960
Chr6_3305331	6	3305331	7.29585	LOC_Os06g06960
Chr6_3305345	6	3305345	6.21042	LOC_Os06g06960
Chr6_3305436	6	3305436	7.1343	LOC_Os06g06960
Chr6_3305485	6	3305485	7.19928	LOC_Os06g06960
Chr6_3305596	6	3305596	7.90309	LOC_Os06g06960
Chr6_3305614	6	3305614	6.79048	LOC_Os06g06960
Chr6_3305626	6	3305626	6.60206	LOC_Os06g06960
Chr6_3305695	6	3305695	7.30803	LOC_Os06g06960
Chr6_3305767	6	3305767	6.83863	LOC_Os06g06960
Chr6_3305814	6	3305814	7.10292	LOC_Os06g06960
Chr6_3305827	6	3305827	7.3851	LOC_Os06g06960
Chr6_3305835	6	3305835	7.21681	LOC_Os06g06960
Chr6_3305860	6	3305860	7.40012	LOC_Os06g06960
Chr6_3305920	6	3305920	6.07314	LOC_Os06g06960
Chr6_3305950	6	3305950	6.48678	LOC_Os06g06960
Chr6_3305962	6	3305962	6.75203	LOC_Os06g06960
Chr6_3306016	6	3306016	6.47756	LOC_Os06g06960
Chr6_3306021	6	3306021	6.40561	LOC_Os06g06960
Chr6_3306024	6	3306024	6.40561	LOC_Os06g06960
Chr6_3306028	6	3306028	6.41567	LOC_Os06g06960
Chr6_3306058	6	3306058	7.13727	LOC_Os06g06960
Chr6_3306059	6	3306059	7.13727	LOC_Os06g06960
Chr6_3306084	6	3306084	7.35067	LOC_Os06g06960
Chr6_3306101	6	3306101	7.35067	LOC_Os06g06960
Chr6_3306136	6	3306136	7.43063	LOC_Os06g06960
Chr6_3306161	6	3306161	6.85699	LOC_Os06g06960
Chr6_3306172	6	3306172	12.6126	LOC_Os06g06960
Chr6_3306178	6	3306178	10.7878	LOC_Os06g06960
Chr6_3306187	6	3306187	6.86967	LOC_Os06g06960
Chr6_3306311	6	3306311	5.61618	LOC_Os06g06960
Chr6_3306398	6	3306398	7.64397	LOC_Os06g06960
Chr6_3306408	6	3306408	8.5986	LOC_Os06g06960
Chr6_3306417	6	3306417	11.2097	LOC_Os06g06960
Chr6_3306430	6	3306430	7.48413	LOC_Os06g06960
Chr6_3306457	6	3306457	8.12668	LOC_Os06g06960
Chr6_3306463	6	3306463	8.55129	LOC_Os06g06960
Chr6_3306468	6	3306468	7.53611	LOC_Os06g06960
Chr6_3306469	6	3306469	7.53611	LOC_Os06g06960
Chr6_3306479	6	3306479	7.74958	LOC_Os06g06960
Chr6_3306485	6	3306485	8.05799	LOC_Os06g06960
Chr6_3306486	6	3306486	8.05552	LOC_Os06g06960
Chr6_3306487	6	3306487	8.05552	LOC_Os06g06960
Chr6_3306489	6	3306489	8.13787	LOC_Os06g06960
Chr6_3306496	6	3306496	6.37161	LOC_Os06g06960
Chr6_3306497	6	3306497	7.30016	LOC_Os06g06960
Chr6_3306502	6	3306502	8.12552	LOC_Os06g06960
Chr6_3306511	6	3306511	7.4045	LOC_Os06g06960
Chr6_3306520	6	3306520	7.79317	LOC_Os06g06960
Chr6_3306786	6	3306786	7.47756	LOC_Os06g06960
Chr6_3306788	6	3306788	8.00349	LOC_Os06g06960
Chr6_3306789	6	3306789	8.00349	LOC_Os06g06960
Chr6_3307269	6	3307269	7.92082	LOC_Os06g06960
Chr6_3307297	6	3307297	7.28904	LOC_Os06g06960
Chr6_3307300	6	3307300	7.49894	LOC_Os06g06960
Chr6_3307306	6	3307306	7.3363	LOC_Os06g06960
Chr6_3307312	6	3307312	7.57512	LOC_Os06g06960
Chr6_3307321	6	3307321	7.47366	LOC_Os06g06960
Chr6_3307324	6	3307324	7.47366	LOC_Os06g06960
Chr6_3307333	6	3307333	6.95468	LOC_Os06g06960
Chr6_3307365	6	3307365	7.18776	LOC_Os06g06960
Chr6_3307371	6	3307371	8.00745	LOC_Os06g06960
Chr6_3307372	6	3307372	8.00745	LOC_Os06g06960
Chr6_3307375	6	3307375	7.5391	LOC_Os06g06960
Chr6_3307387	6	3307387	7.8041	LOC_Os06g06960
Chr6_3307390	6	3307390	8.11862	LOC_Os06g06960
Chr6_3307399	6	3307399	7	LOC_Os06g06960
Chr6_3307400	6	3307400	5.92812	LOC_Os06g06960
Chr6_3307401	6	3307401	5.82681	LOC_Os06g06960
Chr6_3307405	6	3307405	7.07624	LOC_Os06g06960
Chr6_3307415	6	3307415	6.68825	LOC_Os06g06960
Chr6_3307428	6	3307428	5.96658	LOC_Os06g06960
Chr6_3307429	6	3307429	5.96658	LOC_Os06g06960
Chr6_3307434	6	3307434	6.09098	LOC_Os06g06960
Chr6_3307435	6	3307435	6.09098	LOC_Os06g06960
Chr6_3307444	6	3307444	7.14935	LOC_Os06g06960
Chr6_3307445	6	3307445	7.37263	LOC_Os06g06960
Chr6_3307449	6	3307449	7.14935	LOC_Os06g06960
Chr6_3307450	6	3307450	7.37263	LOC_Os06g06960
Chr6_3307451	6	3307451	7.06905	LOC_Os06g06960
Chr6_3307458	6	3307458	5.50724	LOC_Os06g06960
Chr6_3307463	6	3307463	5.44491	LOC_Os06g06960
Chr6_3307464	6	3307464	6.2204	LOC_Os06g06960
Chr6_3307468	6	3307468	6.86012	LOC_Os06g06960
Chr6_3307473	6	3307473	7.53018	LOC_Os06g06960
Chr6_3307480	6	3307480	7.25727	LOC_Os06g06960
Chr6_3307490	6	3307490	6.27409	LOC_Os06g06960
Chr6_3307492	6	3307492	6.46852	LOC_Os06g06960
Chr6_3307530	6	3307530	7.65365	LOC_Os06g06960
Chr6_3307533	6	3307533	8.13847	LOC_Os06g06960
Chr6_3307539	6	3307539	9.25337	LOC_Os06g06960
Chr6_3307556	6	3307556	6.97881	LOC_Os06g06960
Chr6_3307576	6	3307576	6.56225	LOC_Os06g06960
Chr6_3307603	6	3307603	5.67162	LOC_Os06g06960
Chr6_3307606	6	3307606	6.48812	LOC_Os06g06960
Chr6_3307621	6	3307621	6.95468	LOC_Os06g06960
Chr6_3307794	6	3307794	7.42597	LOC_Os06g06960
Chr6_3307807	6	3307807	7.06198	LOC_Os06g06960
Chr6_3307966	6	3307966	7.14935		LOC_Os06g06960
Chr6_3307991	6	3307991	6.96658		LOC_Os06g06960
Chr6_3308023	6	3308023	6.81248		LOC_Os06g06960
Chr6_3308047	6	3308047	6.59688		LOC_Os06g06960
Chr6_3308058	6	3308058	6.83863		LOC_Os06g06960
Chr6_3308074	6	3308074	7.08407		LOC_Os06g06960
Chr6_3308082	6	3308082	6.20761		LOC_Os06g06960
Chr6_3308088	6	3308088	7.27654		LOC_Os06g06960
Chr6_3308117	6	3308117	6.26043		LOC_Os06g06960
Chr6_3308135	6	3308135	6.30103		LOC_Os06g06960
Chr6_3308170	6	3308170	5.47496		LOC_Os06g06960
Chr6_3308192	6	3308192	5.88606		LOC_Os06g06960
Chr6_3308202	6	3308202	6.14752		LOC_Os06g06960
Chr6_3308215	6	3308215	6.34008		LOC_Os06g06960
Chr6_3308311	6	3308311	7.77469		LOC_Os06g06960
Chr6_3308330	6	3308330	6.50724		LOC_Os06g06960
Chr6_3308331	6	3308331	6.37779		LOC_Os06g06960
Chr6_3308373	6	3308373	6.44855		LOC_Os06g06960
Chr6_3308378	6	3308378	5.77728		LOC_Os06g06960
Chr6_3308383	6	3308383	6.04624		LOC_Os06g06960
Chr6_3310001	6	3310001	6.43652		LOC_Os06g06970
Chr6_3310103	6	3310103	5.88941		LOC_Os06g06970
Chr6_3310212	6	3310212	5.52433		LOC_Os06g06970
Chr6_3310222	6	3310222	6.14448		LOC_Os06g06970
Chr6_3310301	6	3310301	7.01728		LOC_Os06g06970
Chr6_3310336	6	3310336	6.40782		LOC_Os06g06970
Chr6_3310341	6	3310341	7.3019		LOC_Os06g06970
Chr6_3310371	6	3310371	7.84771		LOC_Os06g06970
Chr6_3310376	6	3310376	7.9393		LOC_Os06g06970
Chr6_3310448	6	3310448	6.47756		LOC_Os06g06970
Chr6_3312598	6	3312598	6.56384		LOC_Os06g06980
Chr6_3312684	6	3312684	6.53611		LOC_Os06g06980
Chr6_3312767	6	3312767	7.55596		LOC_Os06g06980
Chr6_3312994	6	3312994	6.1349		LOC_Os06g06980
Chr6_3313090	6	3313090	6.69037		LOC_Os06g06980
Chr6_3313125	6	3313125	6.08092		LOC_Os06g06980
Chr6_3313199	6	3313199	7.22257		LOC_Os06g06980
Chr6_3313219	6	3313219	5.55752		LOC_Os06g06980
Chr6_3313271	6	3313271	5.97469		LOC_Os06g06980
Chr6_3313351	6	3313351	5.67366		LOC_Os06g06980
Chr6_3313382	6	3313382	6.34008		LOC_Os06g06980
Chr6_3313442	6	3313442	6.19382		LOC_Os06g06980
Chr6_3313465	6	3313465	6.33819		LOC_Os06g06980
Chr6_3313484	6	3313484	6.17328		LOC_Os06g06980
Chr6_3313563	6	3313563	5.88273		LOC_Os06g06980
Chr6_3313580	6	3313580	5.92812		LOC_Os06g06980
Chr6_3313593	6	3313593	6.96658		LOC_Os06g06980
Chr6_3313615	6	3313615	5.53313		LOC_Os06g06980
Chr6_3313620	6	3313620	6.14267		LOC_Os06g06980
Chr6_3313624	6	3313624	5.78252		LOC_Os06g06980
Chr6_3313634	6	3313634	5.68613		LOC_Os06g06980
Chr6_3313654	6	3313654	5.42366		LOC_Os06g06980
Chr6_3313667	6	3313667	6.13077		LOC_Os06g06980
Chr6_3313671	6	3313671	6.06702		LOC_Os06g06980
Chr6_3313725	6	3313725	5.47108		LOC_Os06g06980
Chr6_3313756	6	3313756	6.23433		LOC_Os06g06980
Chr6_3313766	6	3313766	6.22403		LOC_Os06g06980
Chr6_3313801	6	3313801	6.60033		LOC_Os06g06980
Chr6_3313810	6	3313810	6.01189		LOC_Os06g06980
Chr6_3313836	6	3313836	6.5784		LOC_Os06g06980
Chr6_3313889	6	3313889	5.89279		LOC_Os06g06980
Chr6_3313892	6	3313892	5.96257		LOC_Os06g06980
Chr6_3314105	6	3314105	7.19654		LOC_Os06g06980
Chr6_3314143	6	3314143	7.0381	LOC_Os06g06980
Chr6_3314154	6	3314154	8.87943	LOC_Os06g06980
Chr6_3314160	6	3314160	7.02687	LOC_Os06g06980
Chr6_3314199	6	3314199	6.87615	LOC_Os06g06980
Chr6_3314205	6	3314205	6.13194	LOC_Os06g06980
Chr6_3314209	6	3314209	6.46725	LOC_Os06g06980
Chr6_3314218	6	3314218	6.53018	LOC_Os06g06980
Chr6_3314240	6	3314240	6.53018	LOC_Os06g06980
Chr6_3314403	6	3314403	5.99568	LOC_Os06g06980
Chr6_3314500	6	3314500	6.63639	LOC_Os06g06980
Chr6_3314551	6	3314551	6.94692	LOC_Os06g06980
Chr6_3314611	6	3314611	6.63451	LOC_Os06g06980
Chr6_3314614	6	3314614	6.63451	LOC_Os06g06980
Chr6_3314641	6	3314641	6.32331	LOC_Os06g06980
Chr6_3314757	6	3314757	6.45469	LOC_Os06g06980
Chr6_3314803	6	3314803	6.83863	LOC_Os06g06980
Chr6_3314851	6	3314851	6.39362	LOC_Os06g06980
Chr6_3315058	6	3315058	6.3536	LOC_Os06g06980	LOC_Os06g06990
Chr6_3315345	6	3315345	5.72584	LOC_Os06g06980	LOC_Os06g06990
Chr6_3315535	6	3315535	7.23433		LOC_Os06g06990
Chr6_3322194	6	3322194	5.42597	LOC_Os06g07000	LOC_Os06g07010
Chr6_3329403	6	3329403	6.11919	LOC_Os06g07020
Chr6_3329594	6	3329594	6.44855	LOC_Os06g07020
Chr6_3333591	6	3333591	5.6968
Chr6_3334722	6	3334722	6.97062
Chr6_3343493	6	3343493	5.57025	LOC_Os06g07040
Chr6_3349288	6	3349288	5.4023
Chr6_3349303	6	3349303	6.27491
Chr6_3404875	6	3404875	6.76447		LOC_Os06g07120
Chr6_3408086	6	3408086	6.46852		LOC_Os06g07130
Chr6_3408323	6	3408323	5.85078		LOC_Os06g07130
Chr6_3424782	6	3424782	5.96257
Chr6_3425123	6	3425123	5.82391
Chr6_3938846	6	3938846	5.44491		LOC_Os06g08110
Chr6_4206127	6	4206127	5.63078	LOC_Os06g08520
Chr6_4407604	6	4407604	5.56864		LOC_Os06g08810
Chr6_4433070	6	4433070	6.06803
Chr6_4436334	6	4436334	6.92445		LOC_Os06g08850
Chr6_4436707	6	4436707	6.72584		LOC_Os06g08850
Chr6_4437613	6	4437613	5.60206	LOC_Os06g08850
Chr6_4438015	6	4438015	6.04528	LOC_Os06g08850
Chr6_4438038	6	4438038	5.91721	LOC_Os06g08850
Chr6_4439169	6	4439169	6.91364	LOC_Os06g08850
Chr6_4441867	6	4441867	5.74232	LOC_Os06g08850
Chr6_4445027	6	4445027	5.88273	LOC_Os06g08860
Chr6_4445706	6	4445706	5.59346	LOC_Os06g08860
Chr6_4445716	6	4445716	5.53611	LOC_Os06g08860
Chr6_4446401	6	4446401	6.72354	LOC_Os06g08860
Chr6_4446406	6	4446406	5.56067	LOC_Os06g08860
Chr6_4446455	6	4446455	5.43063	LOC_Os06g08860
Chr6_4446464	6	4446464	5.81248	LOC_Os06g08860
Chr6_4480992	6	4480992	5.42022
Chr6_4481336	6	4481336	5.51856	LOC_Os06g08900
Chr6_4483186	6	4483186	5.40121	LOC_Os06g08900
Chr6_4483845	6	4483845	5.54516	LOC_Os06g08900
Chr6_4483881	6	4483881	5.46344	LOC_Os06g08900
Chr6_4483884	6	4483884	5.63264	LOC_Os06g08900
Chr6_4483984	6	4483984	5.42946	LOC_Os06g08900
Chr6_4484154	6	4484154	5.90309	LOC_Os06g08900
Chr6_4485661	6	4485661	6.50031	LOC_Os06g08900
Chr6_4487151	6	4487151	6.14935	LOC_Os06g08900
Chr6_4494460	6	4494460	5.65365		LOC_Os06g08910
Chr6_4520142	6	4520142	5.44009	LOC_Os06g08960
Chr6_4525402	6	4525402	5.44009		LOC_Os06g08960
Chr6_4526791	6	4526791	5.97062	LOC_Os06g08970	LOC_Os06g08960
Chr6_4526918	6	4526918	6.47625	LOC_Os06g08970	LOC_Os06g08960
Chr6_4527362	6	4527362	5.5544	LOC_Os06g08970
Chr6_4532262	6	4532262	6.38091	LOC_Os06g08990	LOC_Os06g08980
Chr6_4532396	6	4532396	6.37263	LOC_Os06g08990	LOC_Os06g08980
Chr6_4532716	6	4532716	7.25026		LOC_Os06g09000
Chr6_4533085	6	4533085	8.10347		LOC_Os06g09000
Chr6_4533286	6	4533286	8.27165		LOC_Os06g09000
Chr6_4533769	6	4533769	6.83863		LOC_Os06g09000
Chr6_4533805	6	4533805	7.19179		LOC_Os06g09000
Chr6_4533984	6	4533984	6.83268		LOC_Os06g09000
Chr6_4534097	6	4534097	7.10958		LOC_Os06g09000
Chr6_4534159	6	4534159	6.82391		LOC_Os06g09000
Chr6_4534312	6	4534312	6.97881		LOC_Os06g09000
Chr6_4534484	6	4534484	6.81248		LOC_Os06g09000
Chr6_4534589	6	4534589	6.7986		LOC_Os06g09000
Chr6_4534666	6	4534666	7.38722		LOC_Os06g09000
Chr6_4534818	6	4534818	6.91721	LOC_Os06g09000
Chr6_4534942	6	4534942	6.76195	LOC_Os06g09000
Chr6_4535213	6	4535213	7.451
Chr6_4535244	6	4535244	6.18776
Chr6_4535359	6	4535359	6.31695
Chr6_4535430	6	4535430	6.86646
Chr6_4535537	6	4535537	7.72125
Chr6_4535688	6	4535688	5.42597
Chr6_4535784	6	4535784	7.82102
Chr6_4535953	6	4535953	6.7986
Chr6_4536080	6	4536080	6.62342
Chr6_4536202	6	4536202	5.90309
Chr6_4536261	6	4536261	6.79317	LOC_Os06g09010
Chr6_4536270	6	4536270	6.82974	LOC_Os06g09010
Chr6_4536393	6	4536393	6.72816	LOC_Os06g09010	LOC_Os06g09020
Chr6_4536508	6	4536508	6.59688	LOC_Os06g09010	LOC_Os06g09020
Chr6_4536696	6	4536696	5.76447	LOC_Os06g09010	LOC_Os06g09020
Chr6_4536697	6	4536697	5.70115	LOC_Os06g09010	LOC_Os06g09020
Chr6_4536905	6	4536905	7.96257	LOC_Os06g09010	LOC_Os06g09020
Chr6_4536939	6	4536939	6.44977	LOC_Os06g09010	LOC_Os06g09020
Chr6_4536952	6	4536952	5.99568	LOC_Os06g09010	LOC_Os06g09020
Chr6_4537091	6	4537091	6.03339	LOC_Os06g09010	LOC_Os06g09020
Chr6_4537280	6	4537280	6.7167	LOC_Os06g09010	LOC_Os06g09020
Chr6_4537295	6	4537295	5.41117	LOC_Os06g09010	LOC_Os06g09020
Chr6_4813428	6	4813428	5.53611
Chr6_4816659	6	4816659	5.85078
Chr6_4818756	6	4818756	5.9914		LOC_Os06g09470
Chr6_4819598	6	4819598	5.44612	LOC_Os06g09470
Chr6_4820587	6	4820587	5.62525	LOC_Os06g09470
Chr6_4820602	6	4820602	5.79588	LOC_Os06g09470
Chr6_4820723	6	4820723	5.81248	LOC_Os06g09470
Chr6_4832238	6	4832238	6.88273		LOC_Os06g09490
Chr6_4836841	6	4836841	5.44129	LOC_Os06g09500	LOC_Os06g09510
Chr6_5138967	6	5138967	5.46852		LOC_Os06g10090
Chr6_6581765	6	6581765	5.63639
Chr6_6747298	6	6747298	11.4737		LOC_Os06g12450
Chr6_6752887	6	6752887	9.39794	LOC_Os06g12450
Chr6_6752888	6	6752888	9.39794	LOC_Os06g12450
Chr6_6798743	6	6798743	8.39686
Chr6_6799372	6	6799372	6.33913
Chr6_6820916	6	6820916	5.82681		LOC_Os06g12580
Chr6_6830286	6	6830286	6.16877	LOC_Os06g12590
Chr6_934690	6	934690	7.09259	LOC_Os06g02630
Chr7_13462016	7	13462016	6.16877		LOC_Os07g23830
Chr7_18012464	7	18012464	5.7167	LOC_Os07g30430
Chr7_18012466	7	18012466	6.37675	LOC_Os07g30430
Chr7_3939884	7	3939884	7.13253		LOC_Os07g07850
Chr7_9642317	7	9642317	5.43652	LOC_Os07g16460
Chr8_14040775	8	14040775	5.40782	LOC_Os08g23260
Chr8_1599711	8	1599711	5.7986		LOC_Os08g03420
Chr8_16625159	8	16625159	5.54516
Chr8_21714791	8	21714791	5.59517
Chr8_21715426	8	21715426	5.47496
Chr8_21729317	8	21729317	5.74232
Chr8_21737311	8	21737311	5.61618	LOC_Os08g34590
Chr8_21741441	8	21741441	8.0942	LOC_Os08g34600
Chr8_21802999	8	21802999	5.41454		LOC_Os08g34690
Chr8_21826319	8	21826319	5.51286
Chr8_4642703	8	4642703	6.19518		LOC_Os08g08150
Chr8_4720492	8	4720492	5.74473
Chr9_10940150	9	10940150	13.9626
Chr9_10943052	9	10943052	13.9957		LOC_Os09g17890
Chr9_5250964	9	5250964	6.58004	LOC_Os09g09700
Chr9_5622324	9	5622324	6.4698		LOC_Os09g10310
