# Supplementary material for: Genome Wide Association Study on Development and Evolution of Glutinous Rice
Source: Research Square preprint supplement (doi:10.21203/rs.3.rs-649622/v1), 2021-07-06
Supplement: Supplementary file 2 [file 6091e07d5ea598453416b0f4.xlsx]

## Sheet: Sheet1
Supplementary Table S3: Thirty two candidate genes ovelapped in full population, indica, and japonica
Gene ID	Gene annotation
LOC_Os06g03970	receptor-like protein kinase 5 precursor, putative, expressed
LOC_Os06g03980	expressed protein
LOC_Os06g03990 (SSG6)	aminotransferase, classes I and II, domain containing protein, expressed
LOC_Os06g04010	GAGA-binding protein, putative, expressed
LOC_Os06g04020	histone H1, putative, expressed
LOC_Os06g04030	histone H3, putative, expressed
LOC_Os06g04040	WD domain, G-beta repeat domain containing protein, expressed
LOC_Os06g04060	expressed protein
LOC_Os06g04169	hydrolase, alpha/beta fold family domain containing protein, expressed
LOC_Os06g04190	rad1, putative, expressed
LOC_Os06g04200 (Wx)	starch synthase, putative, expressed
LOC_Os06g12450 (OsSSIIa)	soluble starch synthase 2-3, chloroplast precursor, putative, expressed
LOC_Os06g12590	protein kinase, putative, expressed
LOC_Os06g04150	magnesium-protoporphyrin O-methyltransferase, putative, expressed
LOC_Os06g04510	enolase, putative, expressed
LOC_Os06g04300	tRNA 2-phosphotransferase 1, putative, expressed
LOC_Os06g04500	cornichon protein, putative, expressed
LOC_Os06g04450	Sec1 family transport protein, putative, expressed
LOC_Os06g04220	expressed protein
LOC_Os06g04130	lung seven transmembrane domain containing protein, putative, expressed
LOC_Os06g04410	expressed protein
LOC_Os06g04440	expressed protein
LOC_Os06g04240	expressed protein
LOC_Os06g04490	expressed protein
LOC_Os06g04000	peptidyl-prolyl cis-trans isomerase, putative, expressed
LOC_Os06g04480	expressed protein
LOC_Os06g04470	expressed protein
LOC_Os06g04360	expressed protein
LOC_Os06g04195	expressed protein
LOC_Os06g04270	transketolase, chloroplast precursor, putative, expressed
LOC_Os06g12580	pro-resilin precursor, putative, expressed
LOC_Os06g04420	lipoxygenase 4, putative
