# Supplementary material for: Genome Wide Association Study on Development and Evolution of Glutinous Rice
Source: Research Square preprint supplement (doi:10.21203/rs.3.rs-649622/v1), 2021-07-06
Supplement: Supplementary file 3 [file a81e9abaad37d823cbbc5b53.xlsx]

## Sheet: Sheet1
Supplementary Table S1: List and brief introduction of 2108 rice accessions used in this study.
ID	Name	PC1	PC2	PC3	Q1 based on ADMIXTURE for K = 2	Q2 based on ADMIXTURE for K = 2	Subpopulation based on PC and admixture analysis	Endosperm types	IRGC_gid	Country_Origin_supplied	Country_Origin_updated	Status_with_Pedigree-plus-knowledge	Region_of_Origin	K9_group_Admixture
1	IRIS_313-9939	-36.3594	34.6593	69.8192	1e-05	0.99999	japonica	non-glutinous	3058560	Surinam	Surinam	0	SAM	admix
2	IRIS_313-8712	-189.593	-42.5968	7.32262	1e-05	0.99999	japonica	non-glutinous	2666992	India	India	0	SAC	cB (Bas)
3	IRIS_313-8747	-164.274	-87.5288	-14.1512	1e-05	0.99999	japonica	non-glutinous	2666909	Iran	Iran	0	WAS	cB (Bas)
4	IRIS_313-8813	-169.399	-68.6627	-1.67482	1e-05	0.99999	japonica	non-glutinous	2666906	India	India	0	SAC	cB (Bas)
5	IRIS_313-8814	-150.061	-71.3859	-4.8875	1e-05	0.99999	japonica	non-glutinous	3059736	Bhutan	Bhutan	T	SAE	cB (Bas)
6	IRIS_313-9629	-168.437	-74.6724	-2.5049	1e-05	0.99999	japonica	non-glutinous	2666875	India	India	0	SAC	cB (Bas)
7	IRIS_313-8252	-20.1267	-322.342	7.03252	1e-05	0.99999	japonica	non-glutinous	3384086	Bangladesh	Bangladesh	T	SAE	cA (Aus)
8	IRIS_313-8321	1.97892	-296.746	-0.501927	1e-05	0.99999	indica	non-glutinous	3060199	Bangladesh	Bangladesh	P	SAE	cA (Aus)
9	IRIS_313-8390	-15.2695	-320.036	2.95739	1e-05	0.99999	japonica	non-glutinous	3060140	Pakistan	Pakistan	T	SAW	cA (Aus)
10	IRIS_313-8398	-23.3811	-336.992	2.44707	1e-05	0.99999	japonica	non-glutinous	3060132	Pakistan	Pakistan	T	SAW	cA (Aus)
11	IRIS_313-8410	-15.5169	-327.95	18.2507	1e-05	0.99999	japonica	non-glutinous	3060120	Bangladesh	Bangladesh	T	SAE	cA (Aus)
12	IRIS_313-8554	-26.651	-277.37	-3.36406	1e-05	0.99999	japonica	non-glutinous	3059979	India	India	0	SAC	cA (Aus)
13	IRIS_313-8721	-18.2499	-318.271	3.77273	1e-05	0.99999	japonica	non-glutinous	3059821	Bangladesh	Bangladesh	T	SAE	cA (Aus)
14	IRIS_313-8963	-14.0409	-345.038	4.49893	1e-05	0.99999	japonica	non-glutinous	3059596	Bangladesh	Bangladesh	T	SAE	cA (Aus)
15	IRIS_313-9137	-11.7806	-229.939	6.74099	1e-05	0.99999	japonica	non-glutinous	3059439	India	India	0	SAC	cA (Aus)
16	IRIS_313-9283	-15.3408	-330.109	-1.21874	1e-05	0.99999	japonica	non-glutinous	3059319	Pakistan	Pakistan	T	SAW	cA (Aus)
17	IRIS_313-9368	-5.1859	-339.935	8.41051	1e-05	0.99999	japonica	non-glutinous	3059240	Bangladesh	Bangladesh	T	SAE	cA (Aus)
18	IRIS_313-9422	-7.58104	-334.816	-1.02317	1e-05	0.99999	japonica	non-glutinous	3059189	Bangladesh	Bangladesh	T	SAE	cA (Aus)
19	IRIS_313-9610	-25.1949	-318.589	-4.10396	1e-05	0.99999	japonica	non-glutinous	3059022	India	India	T	SAC	cA (Aus)
20	IRIS_313-9626	-13.6324	-360.825	2.48042	1e-05	0.99999	japonica	non-glutinous	3059009	Bangladesh	Bangladesh	T	SAE	cA (Aus)
21	IRIS_313-9636	-51.4811	-282.419	-3.69234	1e-05	0.99999	japonica	non-glutinous	3059001	Sri Lanka	Sri Lanka	T	IOC	cA (Aus)
22	IRIS_313-9661	-5.33501	-326.879	5.92259	1e-05	0.99999	japonica	non-glutinous	3058977	Bangladesh	Bangladesh	T	SAE	cA (Aus)
23	IRIS_313-10020	-59.4114	-279.557	-6.58939	1e-05	0.99999	japonica	non-glutinous	3058478	Sri Lanka	Sri Lanka	T	IOC	cA (Aus)
24	IRIS_313-8253	140.317	58.1416	30.0294	1e-05	0.99999	indica	non-glutinous	3384085	Thailand	Thailand	T	SEA	XI-3
25	IRIS_313-9555	134.473	39.6203	-11.7383	1e-05	0.99999	indica	non-glutinous	3059071	China	China	0	EAS	XI-adm
26	IRIS_313-8409	123.31	37.205	-21.4381	1e-05	0.99999	indica	non-glutinous	3060121	Viet Nam	Viet Nam	T	SEA	XI-adm
27	IRIS_313-9400	25.5639	-4.59234	-14.1965	1e-05	0.99999	indica	non-glutinous	3059208	India	India	0	SAC	XI-adm
28	IRIS_313-9882	127.832	30.8253	-7.55754	1e-05	0.99999	indica	glutinous	3058618	Taiwan	Taiwan	0	EAR	XI-adm
29	IRIS_313-9969	128.674	33.996	-0.80453	1e-05	0.99999	indica	glutinous	3058530	Sri Lanka	Sri Lanka	T	IOC	XI-adm
30	IRIS_313-8399	-292.968	53.5215	-162.488	1e-05	0.99999	japonica	non-glutinous	3060130	France	France	P	EUR	GJ-tmp
31	IRIS_313-8890	-279.023	43.0661	-154.858	1e-05	0.99999	japonica	non-glutinous	3059664	Belgium	Belgium	0	EUR	GJ-tmp
32	IRIS_313-9346	-290.363	52.1114	-192.898	1e-05	0.99999	japonica	non-glutinous	3059260	Taiwan	Taiwan	P	EAR	GJ-tmp
33	IRIS_313-9814	-273.426	42.7569	-128.519	1e-05	0.99999	japonica	non-glutinous	3058686	Hungary	Hungary	0	EUR	GJ-tmp
34	IRIS_313-8324	-29.7739	34.0478	21.126	1e-05	0.99999	japonica	glutinous	3060196	Indonesia	Indonesia	0	SER	admix
35	IRIS_313-8927	-272.888	42.7956	-59.8515	1e-05	0.99999	japonica	non-glutinous	2666867	Taiwan	Taiwan	0	EAR	GJ-sbtrp
36	IRIS_313-9519	-269.707	53.2137	112.38	1e-05	0.99999	japonica	non-glutinous	3059103	Surinam	Surinam	0	SAM	GJ-trp
37	IRIS_313-10152	-266.958	46.3928	104.057	1e-05	0.99999	japonica	glutinous	3058337	Indonesia	Indonesia	T	SER	GJ-trp
38	IRIS_313-8769	-276.036	49.1197	114.115	1e-05	0.99999	japonica	non-glutinous	3059777	Guinea	Guinea	T	WAF	GJ-trp
39	IRIS_313-8999	-261.621	35.817	0.464932	1e-05	0.99999	japonica	non-glutinous	3059559	India	India	0	SAC	GJ-sbtrp
40	IRIS_313-9101	-115.019	48.1235	52.354	1e-05	0.99999	japonica	non-glutinous	3059475	Malaysia	Malaysia	T	SER	admix
41	IRIS_313-9140	-236.177	54.6363	-184.708	1e-05	0.99999	japonica	non-glutinous	3059437	China	China	I	EAS	GJ-tmp
42	IRIS_313-9404	-94.1266	44.4399	-17.5874	1e-05	0.99999	japonica	non-glutinous	2666967	Bhutan	Bhutan	T	SAE	admix
43	IRIS_313-9648	-46.068	-22.1212	28.3004	1e-05	0.99999	japonica	non-glutinous	3058989	United States of America	United States of America	I	NAM	admix
44	IRIS_313-8664	-254.122	40.406	114.526	1e-05	0.99999	japonica	non-glutinous	0	Indonesia	Indonesia	T	SER	GJ-trp
45	IRIS_313-8326	-170.438	-36.4961	-0.648502	1e-05	0.99999	japonica	non-glutinous	2666877	India	India	0	SAC	cB (Bas)
46	IRIS_313-9083	-155.058	-88.5155	5.95937	1e-05	0.99999	japonica	non-glutinous	2666809	India	India	P	SAC	cB (Bas)
47	IRIS_313-9601	-148.231	-86.1818	2.42842	1e-05	0.99999	japonica	non-glutinous	3059031	Pakistan	Pakistan	T	SAW	cB (Bas)
48	IRIS_313-9783	-94.6972	-215.399	-1.00852	1e-05	0.99999	japonica	non-glutinous	3058717	Afghanistan	Afghanistan	T	SAW	admix
49	IRIS_313-9949	-246.312	5.24198	69.1255	1e-05	0.99999	japonica	non-glutinous	3058550	Sri Lanka	Sri Lanka	T	IOC	GJ-trp
50	IRIS_313-8655	-3.23518	-292.33	-2.58579	1e-05	0.99999	japonica	non-glutinous	3059881	Pakistan	Pakistan	T	SAW	cA (Aus)
51	IRIS_313-8771	1.11115	-327.505	11.4989	1e-05	0.99999	indica	non-glutinous	3059775	India	India	0	SAC	cA (Aus)
52	IRIS_313-8789	-12.4876	-322.83	10.4278	1e-05	0.99999	japonica	non-glutinous	3059759	Bangladesh	Bangladesh	T	SAE	cA (Aus)
53	IRIS_313-8864	3.82108	-309.603	9.80948	1e-05	0.99999	indica	non-glutinous	3059689	Bangladesh	Bangladesh	T	SAE	cA (Aus)
54	IRIS_313-9039	115.337	-14.1975	-6.67825	1e-05	0.99999	indica	non-glutinous	3059522	Sri Lanka	Sri Lanka	T	IOC	XI-2
55	IRIS_313-9108	84.9412	4.62532	-34.6038	1e-05	0.99999	indica	non-glutinous	3059468	Bangladesh	Bangladesh	T	SAE	XI-adm
56	IRIS_313-10150	-0.448089	-308.42	5.97402	1e-05	0.99999	japonica	non-glutinous	3058339	India	India	0	SAC	cA (Aus)
57	IRIS_313-8383	134.747	46.39	-6.10587	1e-05	0.99999	indica	non-glutinous	3060145	Philippines	Philippines	T	SER	XI-adm
58	IRIS_313-9809	147.165	47.3019	30.7064	1e-05	0.99999	indica	non-glutinous	0	Sri Lanka	Sri Lanka	T	IOC	XI-3
59	IRIS_313-10041	-268.612	50.4423	116.591	1e-05	0.99999	japonica	non-glutinous	3058452	Madagascar	Madagascar	T	IOC	GJ-trp
60	IRIS_313-8244	130.28	-23.5073	-23.4155	1e-05	0.99999	indica	non-glutinous	3060254	Sri Lanka	Sri Lanka	T	IOC	XI-2
61	IRIS_313-8401	124.444	25.0718	0.345922	1e-05	0.99999	indica	non-glutinous	0	India	India	0	SAC	XI-adm
62	IRIS_313-8405	104.149	41.0229	-23.553	1e-05	0.99999	indica	non-glutinous	3060124	China	China	0	EAS	XI-adm
63	IRIS_313-8660	128.469	-18.9303	-28.0777	1e-05	0.99999	indica	non-glutinous	3059875	Sri Lanka	Sri Lanka	T	IOC	XI-2
64	IRIS_313-8743	123.886	35.77	-11.3261	1e-05	0.99999	indica	non-glutinous	3059801	Taiwan	Taiwan	0	EAR	XI-adm
65	IRIS_313-9111	124.839	24.0817	-44.5592	1e-05	0.99999	indica	non-glutinous	3059465	China	China	0	EAS	XI-1A
66	IRIS_313-9351	106.98	-19.013	-28.3589	1e-05	0.99999	indica	non-glutinous	3059255	India	India	0	SAC	XI-2
67	IRIS_313-10040	124.567	42.8343	-25.4166	1e-05	0.99999	indica	non-glutinous	3058453	Korea, Republic of	Korea, Republic of	I	EAR	XI-1B
68	IRIS_313-10158	77.4017	41.2962	31.0624	1e-05	0.99999	indica	non-glutinous	3058331	Ecuador	Ecuador	0	SAM	XI-adm
69	IRIS_313-9438	-256.445	49.4776	-205.343	1e-05	0.99999	japonica	non-glutinous	3059175	Japan	Japan	0	EAR	GJ-tmp
70	IRIS_313-9724	-274.285	49.3594	-179.455	1e-05	0.99999	japonica	non-glutinous	3058914	China	China	0	EAS	GJ-tmp
71	IRIS_313-9759	-291.157	52.9706	-155.619	1e-05	0.99999	japonica	non-glutinous	3058743	Portugal	Portugal	0	EUR	GJ-tmp
72	IRIS_313-9880	-287.289	42.0712	-145.898	1e-05	0.99999	japonica	non-glutinous	3058620	Hungary	Hungary	P	EUR	GJ-tmp
73	IRIS_313-8578	-272.631	45.2731	-17.9847	1e-05	0.99999	japonica	glutinous	3060308	Viet Nam	Viet Nam	T	SEA	GJ-sbtrp
74	IRIS_313-8594	-267.666	42.2968	111.074	1e-05	0.99999	japonica	non-glutinous	0	Philippines	Philippines	T	SER	GJ-trp
75	IRIS_313-8883	-248.301	42.7971	-126.247	1e-05	0.99999	japonica	non-glutinous	0	Malaysia	Malaysia	T	SER	GJ-adm
76	IRIS_313-9187	-0.738669	23.3062	34.2625	1e-05	0.99999	japonica	non-glutinous	3059405	Malaysia	Malaysia	T	SER	XI-2
77	IRIS_313-9267	-275.073	51.4731	108.763	1e-05	0.99999	japonica	non-glutinous	3059331	Venezuela	Venezuela	P	SAM	GJ-trp
78	IRIS_313-9363	-262.842	53.4595	102.437	1e-05	0.99999	japonica	non-glutinous	3059246	United States of America	United States of America	I	NAM	GJ-trp
79	IRIS_313-9392	-114.747	40.9892	-43.5537	1e-05	0.99999	japonica	non-glutinous	3059215	India	India	0	SAC	admix
80	IRIS_313-9818	-27.1442	52.7257	66.4342	1e-05	0.99999	japonica	non-glutinous	3058682	Mexico	Mexico	P	CAM	admix
81	IRIS_313-9558	-264.409	48.5334	108.281	1e-05	0.99999	japonica	non-glutinous	3059068	Malaysia	Malaysia	T	SER	GJ-trp
82	IRIS_313-8268	-152.743	-55.9166	0.926976	1e-05	0.99999	japonica	non-glutinous	2667032	Nepal	Nepal	T	SAC	cB (Bas)
83	IRIS_313-8498	-101.034	-23.5129	2.63813	1e-05	0.99999	japonica	non-glutinous	3060034	India	India	0	SAC	cB (Bas)
84	IRIS_313-8641	-8.89962	-310.486	10.1978	1e-05	0.99999	japonica	non-glutinous	3059897	Bangladesh	Bangladesh	P	SAE	cA (Aus)
85	IRIS_313-9449	-15.7669	-301.314	3.58317	1e-05	0.99999	japonica	non-glutinous	3059164	Pakistan	Pakistan	T	SAW	cA (Aus)
86	IRIS_313-9641	-20.1126	-286.418	1.09536	1e-05	0.99999	japonica	non-glutinous	3058997	India	India	0	SAC	cA (Aus)
87	IRIS_313-9695	43.364	-197.43	0.360773	1e-05	0.99999	indica	non-glutinous	3058943	Pakistan	Pakistan	T	SAW	cA (Aus)
88	IRIS_313-8288	81.8318	-19.7802	-9.66288	1e-05	0.99999	indica	non-glutinous	2666898	Madagascar	Madagascar	P	IOC	XI-adm
89	IRIS_313-8292	129.014	47.8213	11.8355	1e-05	0.99999	indica	non-glutinous	2666972	Philippines	Philippines	I	SER	XI-3
90	IRIS_313-8745	-280.307	55.7928	113.443	1e-05	0.99999	japonica	non-glutinous	3059799	Haiti	Haiti	0	CAM	GJ-trp
91	IRIS_313-8791	132.677	58.1393	45.7677	1e-05	0.99999	indica	non-glutinous	2666993	Indonesia	Indonesia	T	SER	XI-3
92	IRIS_313-8903	106.166	41.6343	46.9468	1e-05	0.99999	indica	non-glutinous	3059653	Philippines	Philippines	I	SER	XI-3
93	IRIS_313-9606	145.265	35.9262	0.78808	1e-05	0.99999	indica	non-glutinous	2666810	Bangladesh	Bangladesh	P	SAE	XI-2
94	IRIS_313-10030	74.232	-81.8242	-18.985	1e-05	0.99999	indica	non-glutinous	3058465	Madagascar	Madagascar	0	IOC	XI-2
95	IRIS_313-10102	92.5473	-79.5783	-13.8099	1e-05	0.99999	indica	non-glutinous	3058389	Madagascar	Madagascar	0	IOC	XI-2
96	IRIS_313-8265	125.443	10.2886	-37.8365	1e-05	0.99999	indica	non-glutinous	2667017	India	India	0	SAC	XI-adm
97	IRIS_313-8568	109.636	-23.1285	-15.2118	1e-05	0.99999	indica	non-glutinous	3059966	India	India	T	SAC	XI-2
98	IRIS_313-9044	110.242	30.7238	-28.3505	1e-05	0.99999	indica	non-glutinous	3060301	Philippines	Philippines	I	SER-IRRI	XI-1B
99	IRIS_313-9314	142.27	63.9084	33.9955	1e-05	0.99999	indica	non-glutinous	0	Indonesia	Indonesia	T	SER	XI-adm
100	IRIS_313-9424	142.582	36.0081	-11.3541	1e-05	0.99999	indica	non-glutinous	3059187	India	India	0	SAC	XI-adm
101	IRIS_313-9492	138.031	0.490183	-18.2016	1e-05	0.99999	indica	non-glutinous	3059127	India	India	0	SAC	XI-2
102	IRIS_313-9696	138.195	40.7729	6.35956	1e-05	0.99999	indica	non-glutinous	3058942	Bangladesh	Bangladesh	T	SAE	XI-adm
103	IRIS_313-10002	132.268	38.5267	-9.3038	1e-05	0.99999	indica	non-glutinous	3058497	Sri Lanka	Sri Lanka	P	IOC	XI-1B
104	IRIS_313-10224	128.632	35.0506	-58.1976	1e-05	0.99999	indica	non-glutinous	3058263	China	China	0	EAS	XI-1A
105	IRIS_313-8622	108.782	-36.7641	-22.1086	1e-05	0.99999	indica	non-glutinous	3059915	India	India	0	SAC	XI-2
106	IRIS_313-9575	132.743	47.4679	32.1207	1e-05	0.99999	indica	non-glutinous	3059052	Thailand	Thailand	T	SEA	XI-3
107	IRIS_313-9703	-287.765	52.7728	-211.203	1e-05	0.99999	japonica	non-glutinous	3058935	Taiwan	Taiwan	P	EAR	GJ-tmp
108	IRIS_313-9770	-288.592	55.6769	-125.192	1e-05	0.99999	japonica	non-glutinous	0	Italy	Italy	I	EUR	GJ-tmp
109	IRIS_313-9811	-284.09	46.1533	-157.895	1e-05	0.99999	japonica	non-glutinous	3058689	Hungary	Hungary	0	EUR	GJ-tmp
110	IRIS_313-8523	-284.137	52.7432	115.427	1e-05	0.99999	japonica	non-glutinous	2666900	Nigeria	Nigeria	0	WAF	GJ-trp
111	IRIS_313-9301	-228.642	37.4425	82.1609	1e-05	0.99999	japonica	glutinous	3059303	Indonesia	Indonesia	T	SER	GJ-trp
112	IRIS_313-9616	-273.365	46.7258	105.436	1e-05	0.99999	japonica	non-glutinous	3059017	Philippines	Philippines	T	SER	GJ-trp
113	IRIS_313-8256	-255.896	13.6974	-89.8536	1e-05	0.99999	japonica	non-glutinous	2666957	Iran	Iran	T	WAS	GJ-adm
114	IRIS_313-8356	-283.567	45.8971	101.455	1e-05	0.99999	japonica	non-glutinous	3060166	Philippines	Philippines	T	SER	GJ-trp
115	IRIS_313-8735	-253.139	40.6203	-124.59	1e-05	0.99999	japonica	glutinous	3059808	Viet Nam	Viet Nam	T	SEA	GJ-adm
116	IRIS_313-8872	-158.427	30.1699	-37.8537	1e-05	0.99999	japonica	non-glutinous	3059680	Thailand	Thailand	T	SEA	GJ-sbtrp
117	IRIS_313-9048	-268.951	32.3276	-18.9326	1e-05	0.99999	japonica	non-glutinous	3059515	Bhutan	Bhutan	T	SAE	GJ-sbtrp
118	IRIS_313-9081	-299.544	54.1084	-207.773	1e-05	0.99999	japonica	glutinous	3059485	Japan	Japan	T	EAR	GJ-tmp
119	IRIS_313-9239	-260.63	45.3529	100.895	1e-05	0.99999	japonica	non-glutinous	3059355	Indonesia	Indonesia	T	SER	GJ-trp
120	IRIS_313-8385	-192.753	-31.5136	-1.79675	1e-05	0.99999	japonica	non-glutinous	2666874	India	India	P	SAC	cB (Bas)
121	IRIS_313-9053	-209.457	-21.7696	-0.0189279	1e-05	0.99999	japonica	non-glutinous	3059509	India	India	0	SAC	admix
122	IRIS_313-9445	-145.117	-49.5406	-1.082	1e-05	0.99999	japonica	non-glutinous	3059167	Bangladesh	Bangladesh	T	SAE	admix
123	IRIS_313-9464	-30.6123	38.0246	65.1694	1e-05	0.99999	japonica	non-glutinous	3059150	Surinam	Surinam	I	SAM	admix
124	IRIS_313-10051	-278.544	52.1399	111.602	1e-05	0.99999	japonica	non-glutinous	3058441	Madagascar	Madagascar	T	IOC	GJ-trp
125	IRIS_313-8765	-155.643	-52.9237	-11.6395	1e-05	0.99999	japonica	non-glutinous	3059781	Bhutan	Bhutan	T	SAE	cB (Bas)
126	IRIS_313-9170	-170.746	-29.6667	-6.44715	1e-05	0.99999	japonica	non-glutinous	0	Bangladesh	Bangladesh	P	SAE	cB (Bas)
127	IRIS_313-9682	-165.321	-33.9961	-4.76023	1e-05	0.99999	japonica	non-glutinous	3058956	Bangladesh	Bangladesh	P	SAE	cB (Bas)
128	IRIS_313-8656	-156.781	-108.031	4.50097	1e-05	0.99999	japonica	non-glutinous	3059880	Pakistan	Pakistan	T	SAW	cB (Bas)
129	IRIS_313-9172	-183.773	-44.4338	1.48121	1e-05	0.99999	japonica	non-glutinous	3059420	India	India	0	SAC	cB (Bas)
130	IRIS_313-8316	126.943	54.3519	56.0852	1e-05	0.99999	indica	non-glutinous	3060204	Malaysia	Malaysia	0	SER	XI-3
131	IRIS_313-9516	103.993	-53.382	-15.9005	1e-05	0.99999	indica	non-glutinous	3059106	India	India	0	SAC	XI-2
132	IRIS_313-9861	-14.4598	-295.369	7.37615	1e-05	0.99999	japonica	non-glutinous	0	Sri Lanka	Sri Lanka	T	IOC	cA (Aus)
133	IRIS_313-8341	139.09	43.8614	-19.048	1e-05	0.99999	indica	non-glutinous	3060180	Viet Nam	Viet Nam	0	SEA	XI-adm
134	IRIS_313-8303	138.655	12.0825	-9.22487	1e-05	0.99999	indica	non-glutinous	3060216	India	India	T	SAC	XI-2
135	IRIS_313-8314	-237.231	34.9128	71.7282	1e-05	0.99999	japonica	non-glutinous	3060206	Indonesia	Indonesia	T	SER	GJ-trp
136	IRIS_313-8349	123.453	14.1578	-11.6964	1e-05	0.99999	indica	non-glutinous	3060172	Bangladesh	Bangladesh	T	SAE	XI-2
137	IRIS_313-8368	135.429	57.9224	39.7713	1e-05	0.99999	indica	non-glutinous	3060157	Indonesia	Indonesia	T	SER	XI-adm
138	IRIS_313-8380	130.942	29.8649	-59.3291	1e-05	0.99999	indica	glutinous	3060148	China	China	0	EAS	XI-1A
139	IRIS_313-8382	22.6443	-146.13	5.303	1e-05	0.99999	indica	non-glutinous	0	India	India	0	SAC	admix
140	IRIS_313-8392	119.179	32.3075	-13.0931	1e-05	0.99999	indica	non-glutinous	3060138	Philippines	Philippines	I	SER-IRRI	XI-1B
141	IRIS_313-8412	130.743	38.0948	-47.3464	1e-05	0.99999	indica	non-glutinous	3060118	China	China	0	EAS	XI-adm
142	IRIS_313-8433	137.992	54.842	-75.638	1e-05	0.99999	indica	non-glutinous	3060098	China	China	0	EAS	XI-1A
143	IRIS_313-8435	132.476	36.4085	-63.4082	1e-05	0.99999	indica	non-glutinous	3060096	India	India	T	SAC	XI-1A
144	IRIS_313-8437	145.836	51.3668	15.5028	1e-05	0.99999	indica	non-glutinous	3060093	Bangladesh	Bangladesh	T	SAE	XI-adm
145	IRIS_313-8450	126.922	-29.8188	-11.8663	1e-05	0.99999	indica	non-glutinous	3060080	India	India	P	SAC	XI-2
146	IRIS_313-8453	139.764	42.9577	-11.557	1e-05	0.99999	indica	non-glutinous	3060077	India	India	0	SAC	XI-adm
147	IRIS_313-8454	139.493	47.2399	-67.8227	1e-05	0.99999	indica	non-glutinous	3060076	Taiwan	Taiwan	0	EAR	XI-1A
148	IRIS_313-8458	128.902	21.3613	0.805511	1e-05	0.99999	indica	non-glutinous	3060072	India	India	0	SAC	XI-adm
149	IRIS_313-8474	135.599	50.6525	10.5225	1e-05	0.99999	indica	glutinous	3060059	Thailand	Thailand	T	SEA	XI-3
150	IRIS_313-8485	144.619	64.9695	33.4939	1e-05	0.99999	indica	non-glutinous	2666901	Thailand	Thailand	T	SEA	XI-3
151	IRIS_313-8509	141.73	-3.01734	-23.444	1e-05	0.99999	indica	non-glutinous	3060020	Bangladesh	Bangladesh	T	SAE	XI-2
152	IRIS_313-8514	141.286	42.4296	-28.634	1e-05	0.99999	indica	non-glutinous	3060015	Ghana	Ghana	T	WAF	XI-1B
153	IRIS_313-8536	131.067	61.1148	30.5365	1e-05	0.99999	indica	non-glutinous	3059994	Indonesia	Indonesia	T	SER	XI-3
154	IRIS_313-8559	126.559	2.60245	-36.2497	1e-05	0.99999	indica	non-glutinous	3059974	India	India	0	SAC	XI-2
155	IRIS_313-8585	136.165	49.9226	-14.5623	1e-05	0.99999	indica	non-glutinous	3059951	India	India	0	SAC	XI-adm
156	IRIS_313-8603	123.588	37.5883	-27.8022	1e-05	0.99999	indica	glutinous	3059933	India	India	0	SAC	XI-adm
157	IRIS_313-8614	145.569	24.2245	-7.09183	1e-05	0.99999	indica	non-glutinous	3059922	India	India	0	SAC	XI-2
158	IRIS_313-8616	143.202	34.4856	-34.0072	1e-05	0.99999	indica	non-glutinous	3059920	Philippines	Philippines	I	SER-IRRI	XI-1B
159	IRIS_313-8621	141.217	47.4787	-28.6302	1e-05	0.99999	indica	non-glutinous	3059916	India	India	0	SAC	XI-1B
160	IRIS_313-8631	123.23	1.35484	-41.1175	1e-05	0.99999	indica	non-glutinous	3059907	India	India	0	SAC	XI-2
161	IRIS_313-8632	127.371	10.8033	-4.90887	1e-05	0.99999	indica	non-glutinous	0	Bangladesh	Bangladesh	T	SAE	XI-2
162	IRIS_313-8645	128.348	35.9276	-71.9592	1e-05	0.99999	indica	non-glutinous	3059893	China	China	T	EAS	XI-1A
163	IRIS_313-8647	125.18	-16.9656	-35.1889	1e-05	0.99999	indica	non-glutinous	3059889	India	India	0	SAC	XI-2
164	IRIS_313-8659	135.155	38.1554	3.66489	1e-05	0.99999	indica	non-glutinous	0	Myanmar	Myanmar	0	SEA	XI-adm
165	IRIS_313-8674	144.666	48.9982	28.8552	1e-05	0.99999	indica	non-glutinous	3059862	Thailand	Thailand	T	SEA	XI-3
166	IRIS_313-8679	147.093	59.0904	30.3172	1e-05	0.99999	indica	non-glutinous	3059857	Thailand	Thailand	T	SEA	XI-3
167	IRIS_313-8697	143.74	63.1298	21.1463	1e-05	0.99999	indica	non-glutinous	3059841	Myanmar	Myanmar	P	SEA	XI-3
168	IRIS_313-8704	121.268	-45.4714	-12.6791	1e-05	0.99999	indica	non-glutinous	0	India	India	T	SAC	XI-2
169	IRIS_313-8717	133.961	5.21409	2.41523	1e-05	0.99999	indica	non-glutinous	3059824	Bangladesh	Bangladesh	T	SAE	XI-adm
170	IRIS_313-8731	131.257	6.88323	-21.0741	1e-05	0.99999	indica	non-glutinous	3059811	India	India	T	SAC	XI-2
171	IRIS_313-8732	134.775	47.6068	-34.1206	1e-05	0.99999	indica	non-glutinous	3059810	Thailand	Thailand	T	SEA	XI-1B
172	IRIS_313-8737	128.846	6.94041	-5.96629	1e-05	0.99999	indica	non-glutinous	3059806	Bangladesh	Bangladesh	P	SAE	XI-2
173	IRIS_313-8744	129.28	49.8606	34.9336	1e-05	0.99999	indica	non-glutinous	3059800	Indonesia	Indonesia	T	SER	XI-3
174	IRIS_313-8754	136.121	-12.9286	-27.884	1e-05	0.99999	indica	non-glutinous	3059792	India	India	T	SAC	XI-2
175	IRIS_313-8757	127.83	-1.39108	-11.6632	1e-05	0.99999	indica	non-glutinous	3059789	India	India	0	SAC	XI-2
176	IRIS_313-8783	63.715	-107.613	-23.9427	1e-05	0.99999	indica	non-glutinous	3059764	Sri Lanka	Sri Lanka	T	IOC	admix
177	IRIS_313-8796	130.112	3.15571	-14.4646	1e-05	0.99999	indica	non-glutinous	3059754	India	India	T	SAC	XI-2
178	IRIS_313-8812	127.39	57.4573	38.5356	1e-05	0.99999	indica	non-glutinous	3059737	Indonesia	Indonesia	T	SER	XI-3
179	IRIS_313-8822	-12.8517	-226.7	-3.0048	1e-05	0.99999	japonica	non-glutinous	0	Bangladesh	Bangladesh	P	SAE	cA (Aus)
180	IRIS_313-8844	142.145	26.7929	-4.09272	1e-05	0.99999	indica	non-glutinous	3059709	India	India	0	SAC	XI-2
181	IRIS_313-8846	152.52	28.7355	-3.38261	1e-05	0.99999	indica	non-glutinous	3059707	Indonesia	Indonesia	0	SER	XI-adm
182	IRIS_313-8850	110.185	-34.1725	-8.14744	1e-05	0.99999	indica	non-glutinous	3059704	Bangladesh	Bangladesh	T	SAE	XI-2
183	IRIS_313-8854	134.133	37.6428	11.7219	1e-05	0.99999	indica	non-glutinous	3059700	Bangladesh	Bangladesh	T	SAE	XI-2
184	IRIS_313-8859	113.525	18.2918	-54.3614	1e-05	0.99999	indica	non-glutinous	3059695	China	China	0	EAS	XI-1A
185	IRIS_313-8880	18.0578	25.6614	-26.9843	1e-05	0.99999	indica	non-glutinous	2666865	Taiwan	Taiwan	I	EAR	XI-adm
186	IRIS_313-8889	118.086	41.981	-21.7711	1e-05	0.99999	indica	non-glutinous	3059665	China	China	0	EAS	XI-adm
187	IRIS_313-8895	133.753	47.598	35.8131	1e-05	0.99999	indica	non-glutinous	3059660	Thailand	Thailand	T	SEA	XI-3
188	IRIS_313-8900	144.813	12.3832	-4.14905	1e-05	0.99999	indica	non-glutinous	3059656	India	India	0	SAC	XI-2
189	IRIS_313-8909	142.616	63.8161	14.0267	1e-05	0.99999	indica	non-glutinous	3059645	Tanzania	Tanzania	T	EAF	XI-3
190	IRIS_313-8914	115.276	34.9644	-51.6336	1e-05	0.99999	indica	non-glutinous	3059640	China	China	0	EAS	XI-adm
191	IRIS_313-8920	133.945	9.11508	-9.92532	1e-05	0.99999	indica	non-glutinous	3059637	India	India	0	SAC	XI-2
192	IRIS_313-8924	132.563	3.40404	-26.9335	1e-05	0.99999	indica	non-glutinous	3059633	India	India	T	SAC	XI-2
193	IRIS_313-8925	120.458	-16.7442	-22.1241	1e-05	0.99999	indica	non-glutinous	3059632	Sri Lanka	Sri Lanka	T	IOC	XI-2
194	IRIS_313-8930	133.125	37.086	7.92461	1e-05	0.99999	indica	non-glutinous	3059628	Bangladesh	Bangladesh	T	SAE	XI-1B
195	IRIS_313-8932	128.659	55.7336	23.2728	1e-05	0.99999	indica	non-glutinous	3059626	Bangladesh	Bangladesh	T	SAE	XI-3
196	IRIS_313-8935	43.4293	53.8988	14.7402	1e-05	0.99999	indica	non-glutinous	3059623	India	India	0	SAC	XI-adm
197	IRIS_313-8940	139.295	55.8527	-79.4556	1e-05	0.99999	indica	non-glutinous	3059617	China	China	0	EAS	XI-1A
198	IRIS_313-8946	123.336	46.8166	-7.6996	1e-05	0.99999	indica	non-glutinous	3059612	India	India	0	SAC	XI-adm
199	IRIS_313-8948	140.88	50.7196	13.9748	1e-05	0.99999	indica	non-glutinous	3059611	Philippines	Philippines	T	SER	XI-3
200	IRIS_313-8956	118.64	58.1337	33.4738	1e-05	0.99999	indica	non-glutinous	3059603	Indonesia	Indonesia	T	SER	XI-3
201	IRIS_313-8957	145.801	20.0366	-3.53995	1e-05	0.99999	indica	non-glutinous	3059602	India	India	P	SAC	XI-2
202	IRIS_313-8967	139.552	53.0453	-17.9595	1e-05	0.99999	indica	non-glutinous	3059592	India	India	0	SAC	XI-adm
203	IRIS_313-8968	133.886	-27.0868	-28.3408	1e-05	0.99999	indica	non-glutinous	3059591	Sri Lanka	Sri Lanka	T	IOC	XI-2
204	IRIS_313-8980	148.309	62.5896	23.894	1e-05	0.99999	indica	non-glutinous	3059580	Thailand	Thailand	T	SEA	XI-3
205	IRIS_313-8982	113.022	-13.1958	-18.4046	1e-05	0.99999	indica	non-glutinous	3059579	India	India	0	SAC	XI-adm
206	IRIS_313-8985	144.757	57.956	21.2588	1e-05	0.99999	indica	non-glutinous	3059576	Thailand	Thailand	T	SEA	XI-3
207	IRIS_313-8986	96.7571	-53.6366	-17.4037	1e-05	0.99999	indica	non-glutinous	3059574	India	India	T	SAC	XI-adm
208	IRIS_313-8988	143.94	0.841717	-23.5163	1e-05	0.99999	indica	non-glutinous	3059572	India	India	T	SAC	XI-2
209	IRIS_313-8994	137.97	42.0771	5.26478	1e-05	0.99999	indica	non-glutinous	3059565	India	India	0	SAC	XI-adm
210	IRIS_313-9006	142.037	54.9145	8.69914	1e-05	0.99999	indica	glutinous	3059553	Thailand	Thailand	T	SEA	XI-3
211	IRIS_313-9017	152.591	43.0472	22.1945	1e-05	0.99999	indica	non-glutinous	3059544	China	China	0	EAS	XI-adm
212	IRIS_313-9019	146.917	63.5125	30.1049	1e-05	0.99999	indica	glutinous	3059541	Thailand	Thailand	T	SEA	XI-3
213	IRIS_313-9020	132.609	47.8823	40.5196	1e-05	0.99999	indica	non-glutinous	3059540	Thailand	Thailand	T	SEA	XI-3
214	IRIS_313-9023	121.467	25.262	-15.3199	1e-05	0.99999	indica	non-glutinous	3059537	India	India	P	SAC	XI-adm
215	IRIS_313-9032	129.029	42.8586	-0.7667	1e-05	0.99999	indica	non-glutinous	3059528	Thailand	Thailand	0	SEA	XI-1B
216	IRIS_313-9065	127.148	32.5759	-76.1163	1e-05	0.99999	indica	non-glutinous	3059498	China	China	0	EAS	XI-1A
217	IRIS_313-9066	42.9639	47.4986	27.5233	1e-05	0.99999	indica	non-glutinous	3059497	Bangladesh	Bangladesh	P	SAE	XI-1B
218	IRIS_313-9067	116.84	-1.26522	-0.532352	1e-05	0.99999	indica	non-glutinous	3059496	Bangladesh	Bangladesh	T	SAE	XI-2
219	IRIS_313-9070	135.279	52.563	48.5225	1e-05	0.99999	indica	non-glutinous	3059493	Malaysia	Malaysia	T	SER	XI-3
220	IRIS_313-9072	144.461	-2.26067	-16.8105	1e-05	0.99999	indica	non-glutinous	3059491	Bangladesh	Bangladesh	T	SAE	XI-2
221	IRIS_313-9112	141.524	66.2391	27.8549	1e-05	0.99999	indica	non-glutinous	3059464	Thailand	Thailand	0	SEA	XI-3
222	IRIS_313-9114	137.929	48.3408	-5.5164	1e-05	0.99999	indica	non-glutinous	3059462	Thailand	Thailand	P	SEA	XI-adm
223	IRIS_313-9115	137.125	61.9755	36.8866	1e-05	0.99999	indica	non-glutinous	3059461	Thailand	Thailand	P	SEA	XI-3
224	IRIS_313-9116	124.178	40.5177	35.6097	1e-05	0.99999	indica	non-glutinous	3059460	Thailand	Thailand	0	SEA	XI-3
225	IRIS_313-9119	137.776	63.0845	36.4511	1e-05	0.99999	indica	non-glutinous	3059456	Thailand	Thailand	0	SEA	XI-3
226	IRIS_313-9120	-19.1107	-19.0526	-13.6765	1e-05	0.99999	japonica	non-glutinous	3059455	India	India	0	SAC	admix
227	IRIS_313-9121	145.305	5.03418	-9.49569	1e-05	0.99999	indica	non-glutinous	3059454	Thailand	Thailand	T	SEA	XI-2
228	IRIS_313-9139	132.111	3.07484	-2.75076	1e-05	0.99999	indica	non-glutinous	3060299	Bangladesh	Bangladesh	T	SAE	XI-2
229	IRIS_313-9148	111.833	-19.18	-17.4086	1e-05	0.99999	indica	non-glutinous	3059429	Bangladesh	Bangladesh	P	SAE	XI-2
230	IRIS_313-9174	136.082	37.5998	10.1206	1e-05	0.99999	indica	non-glutinous	3059418	Bangladesh	Bangladesh	T	SAE	XI-2
231	IRIS_313-9184	113.117	42.3689	-26.9149	1e-05	0.99999	indica	non-glutinous	3059409	China	China	0	EAS	XI-adm
232	IRIS_313-9197	131.841	54.1442	28.2926	1e-05	0.99999	indica	non-glutinous	3059395	India	India	0	SAC	XI-3
233	IRIS_313-9198	144.152	62.0079	1.80351	1e-05	0.99999	indica	glutinous	0	Lao People's Democratic Republic	Lao People's Democratic Republic	0	SEA	XI-3
234	IRIS_313-9201	-267.225	52.7904	32.5471	1e-05	0.99999	japonica	non-glutinous	3059391	India	India	0	SAC	GJ-trp
235	IRIS_313-9204	117.485	30.5118	-58.6664	1e-05	0.99999	indica	non-glutinous	3059388	China	China	0	EAS	XI-1A
236	IRIS_313-9208	122.676	46.7791	35.8197	1e-05	0.99999	indica	non-glutinous	3059385	Indonesia	Indonesia	T	SER	XI-3
237	IRIS_313-9209	144.683	54.3655	33.3959	1e-05	0.99999	indica	non-glutinous	3059384	Thailand	Thailand	T	SEA	XI-3
238	IRIS_313-9210	135.977	58.6654	49.3354	1e-05	0.99999	indica	non-glutinous	3059383	Malaysia	Malaysia	T	SER	XI-3
239	IRIS_313-9218	142.475	28.4118	3.12958	1e-05	0.99999	indica	non-glutinous	3059375	Bangladesh	Bangladesh	T	SAE	XI-2
240	IRIS_313-9227	136.333	51.0679	-33.4487	1e-05	0.99999	indica	non-glutinous	3059367	Thailand	Thailand	P	SEA	XI-1B
241	IRIS_313-9251	128.198	50.0771	46.5608	1e-05	0.99999	indica	non-glutinous	3059348	Indonesia	Indonesia	T	SER	XI-3
242	IRIS_313-9253	105.237	38.6217	-86.3514	1e-05	0.99999	indica	non-glutinous	3059346	China	China	0	EAS	XI-1A
243	IRIS_313-9256	99.7442	-44.9486	-13.496	1e-05	0.99999	indica	non-glutinous	3059344	Sri Lanka	Sri Lanka	T	IOC	XI-adm
244	IRIS_313-9258	132.09	8.42874	-24.3413	1e-05	0.99999	indica	non-glutinous	3059342	India	India	T	SAC	XI-2
245	IRIS_313-9259	109.157	9.14923	-13.2971	1e-05	0.99999	indica	non-glutinous	3059340	India	India	0	SAC	XI-2
246	IRIS_313-9262	139.769	21.2939	1.75311	1e-05	0.99999	indica	non-glutinous	3059336	Bangladesh	Bangladesh	T	SAE	XI-2
247	IRIS_313-9271	145.089	12.822	-9.64984	1e-05	0.99999	indica	non-glutinous	3059327	Bangladesh	Bangladesh	T	SAE	XI-2
248	IRIS_313-9281	142.454	58.2363	29.5782	1e-05	0.99999	indica	non-glutinous	3059321	Thailand	Thailand	T	SEA	XI-3
249	IRIS_313-9285	140.269	40.1845	0.862937	1e-05	0.99999	indica	non-glutinous	3059318	Myanmar	Myanmar	0	SEA	XI-adm
250	IRIS_313-9286	136.39	63.9768	30.5467	1e-05	0.99999	indica	non-glutinous	3059317	Thailand	Thailand	0	SEA	XI-3
251	IRIS_313-9287	134.739	12.308	-7.2341	1e-05	0.99999	indica	non-glutinous	3059316	India	India	0	SAC	XI-2
252	IRIS_313-9302	146.999	59.8461	28.2474	1e-05	0.99999	indica	glutinous	3059302	Thailand	Thailand	I	SEA	XI-3
253	IRIS_313-9313	84.1706	-62.8254	-21.4489	1e-05	0.99999	indica	non-glutinous	3059291	India	India	T	SAC	XI-adm
254	IRIS_313-9317	127.165	41.9037	-15.4423	1e-05	0.99999	indica	non-glutinous	3059287	Viet Nam	Viet Nam	T	SEA	XI-adm
255	IRIS_313-9320	131.603	59.8698	29.8674	1e-05	0.99999	indica	non-glutinous	3059284	Indonesia	Indonesia	T	SER	XI-3
256	IRIS_313-9324	135.344	48.5713	-65.2561	1e-05	0.99999	indica	non-glutinous	3059282	China	China	T	EAS	XI-1A
257	IRIS_313-9325	136.955	44.1592	5.60428	1e-05	0.99999	indica	non-glutinous	3059281	Bangladesh	Bangladesh	T	SAE	XI-1B
258	IRIS_313-9347	134.486	25.1616	-5.10352	1e-05	0.99999	indica	non-glutinous	3059259	India	India	0	SAC	XI-adm
259	IRIS_313-9348	105.708	6.20209	-2.19887	1e-05	0.99999	indica	non-glutinous	3059258	India	India	0	SAC	XI-2
260	IRIS_313-9357	148.463	63.1419	29.2952	1e-05	0.99999	indica	non-glutinous	3059249	Thailand	Thailand	0	SEA	XI-3
261	IRIS_313-9372	135.049	44.1883	-69.0152	1e-05	0.99999	indica	non-glutinous	3059236	China	China	0	EAS	XI-1A
262	IRIS_313-9384	124.102	-8.54415	-14.9472	1e-05	0.99999	indica	non-glutinous	3059223	India	India	T	SAC	XI-2
263	IRIS_313-9391	145.075	40.1249	-0.838152	1e-05	0.99999	indica	non-glutinous	3059216	Bangladesh	Bangladesh	T	SAE	XI-2
264	IRIS_313-9403	120.72	-44.5484	-20.4812	1e-05	0.99999	indica	non-glutinous	3059205	India	India	T	SAC	XI-2
265	IRIS_313-9415	147.887	52.2386	29.6999	1e-05	0.99999	indica	non-glutinous	0	Thailand	Thailand	T	SEA	XI-3
266	IRIS_313-9427	144.567	51.1062	-2.80257	1e-05	0.99999	indica	non-glutinous	3059184	India	India	0	SAC	XI-adm
267	IRIS_313-9433	134.576	35.3645	-1.77893	1e-05	0.99999	indica	non-glutinous	3059179	India	India	0	SAC	XI-2
268	IRIS_313-9451	139.256	47.2663	-4.26511	1e-05	0.99999	indica	non-glutinous	3059162	Thailand	Thailand	T	SEA	XI-adm
269	IRIS_313-9461	133.117	40.5129	38.8315	1e-05	0.99999	indica	non-glutinous	3059153	Senegal	Senegal	0	WAF	XI-3
270	IRIS_313-9469	131.163	48.5861	-67.4252	1e-05	0.99999	indica	non-glutinous	3059146	China	China	T	EAS	XI-1A
271	IRIS_313-9472	131.232	21.969	15.6211	1e-05	0.99999	indica	non-glutinous	3059143	Sri Lanka	Sri Lanka	0	IOC	XI-adm
272	IRIS_313-9482	122.186	33.9594	-33.5296	1e-05	0.99999	indica	non-glutinous	3059134	China	China	0	EAS	XI-1B
273	IRIS_313-9484	136.951	37.8522	-8.50821	1e-05	0.99999	indica	non-glutinous	3059133	India	India	T	SAC	XI-adm
274	IRIS_313-9505	130.379	37.1572	-74.2597	1e-05	0.99999	indica	non-glutinous	3059117	Philippines	Philippines	T	SER	XI-1A
275	IRIS_313-9506	-40.3238	4.15032	-42.0479	1e-05	0.99999	japonica	non-glutinous	0	Bhutan	Bhutan	T	SAE	admix
276	IRIS_313-9522	113.038	28.3358	-17.8946	1e-05	0.99999	indica	non-glutinous	3059100	India	India	0	SAC	XI-adm
277	IRIS_313-9533	142.001	58.8007	29.1029	1e-05	0.99999	indica	non-glutinous	3059094	Indonesia	Indonesia	0	SER	XI-3
278	IRIS_313-9547	143.81	15.2641	-24.186	1e-05	0.99999	indica	non-glutinous	3059079	India	India	T	SAC	XI-2
279	IRIS_313-9551	140.353	13.5207	-11.8882	1e-05	0.99999	indica	non-glutinous	3059075	Madagascar	Madagascar	0	IOC	XI-2
280	IRIS_313-9557	113.239	-9.31234	-14.9557	1e-05	0.99999	indica	non-glutinous	3059069	India	India	T	SAC	XI-2
281	IRIS_313-9560	136.38	51.3598	-9.23062	1e-05	0.99999	indica	non-glutinous	3059066	India	India	0	SAC	XI-adm
282	IRIS_313-9566	137.552	30.0607	-40.6167	1e-05	0.99999	indica	non-glutinous	3059062	India	India	I	SAC	XI-1B
283	IRIS_313-9567	137.534	54.9298	43.6253	1e-05	0.99999	indica	non-glutinous	3059061	Thailand	Thailand	0	SEA	XI-3
284	IRIS_313-9570	113.036	48.3642	-29.7749	1e-05	0.99999	indica	non-glutinous	3059058	China	China	0	EAS	XI-adm
285	IRIS_313-9572	93.6443	-58.6593	-15.4656	1e-05	0.99999	indica	non-glutinous	3059056	Bhutan	Bhutan	T	SAE	XI-adm
286	IRIS_313-9574	135.274	43.3139	27.212	1e-05	0.99999	indica	non-glutinous	3059053	Brunei Darussalam	Brunei Darussalam	T	SER	XI-adm
287	IRIS_313-9590	123.452	52.5886	29.4691	1e-05	0.99999	indica	non-glutinous	3059040	Indonesia	Indonesia	T	SER	XI-3
288	IRIS_313-9593	152.115	53.0434	-11.0532	1e-05	0.99999	indica	non-glutinous	3059038	India	India	0	SAC	XI-adm
289	IRIS_313-9594	146.045	54.2823	14.6026	1e-05	0.99999	indica	non-glutinous	3059037	Bangladesh	Bangladesh	T	SAE	XI-adm
290	IRIS_313-9600	-8.76922	41.7394	45.6922	1e-05	0.99999	japonica	non-glutinous	3059032	Thailand	Thailand	T	SEA	XI-adm
291	IRIS_313-9602	133.933	37.3255	5.33252	1e-05	0.99999	indica	non-glutinous	3059030	Thailand	Thailand	0	SEA	XI-adm
292	IRIS_313-9604	117.659	22.211	-44.2583	1e-05	0.99999	indica	non-glutinous	3059028	India	India	0	SAC	XI-adm
293	IRIS_313-9609	123.497	28.8885	-27.9288	1e-05	0.99999	indica	non-glutinous	3059023	India	India	0	SAC	XI-adm
294	IRIS_313-9611	136.37	11.9361	-25.3447	1e-05	0.99999	indica	non-glutinous	3059021	India	India	T	SAC	XI-2
295	IRIS_313-9617	127.692	10.7203	0.906284	1e-05	0.99999	indica	non-glutinous	3059016	Bangladesh	Bangladesh	T	SAE	XI-2
296	IRIS_313-9623	134.271	34.4072	-13.3881	1e-05	0.99999	indica	non-glutinous	3059011	Brazil	Brazil	0	SAM	XI-adm
297	IRIS_313-9634	119.985	30.291	1.92948	1e-05	0.99999	indica	non-glutinous	3059003	India	India	0	SAC	XI-adm
298	IRIS_313-9637	102.421	29.1475	4.6511	1e-05	0.99999	indica	non-glutinous	3059000	Viet Nam	Viet Nam	T	SEA	XI-3
299	IRIS_313-9669	141.017	61.4142	10.4524	1e-05	0.99999	indica	glutinous	3058969	Thailand	Thailand	T	SEA	XI-3
300	IRIS_313-9697	144.399	56.1475	34.6969	1e-05	0.99999	indica	non-glutinous	3058941	Thailand	Thailand	T	SEA	XI-3
301	IRIS_313-9705	130.668	42.7582	-67.1204	1e-05	0.99999	indica	non-glutinous	3058933	Taiwan	Taiwan	0	EAR	XI-1A
302	IRIS_313-9706	127.754	42.1185	-60.76	1e-05	0.99999	indica	non-glutinous	3058932	Taiwan	Taiwan	0	EAR	XI-1A
303	IRIS_313-9708	124.202	40.7212	-67.4826	1e-05	0.99999	indica	non-glutinous	3058930	Taiwan	Taiwan	0	EAR	XI-1A
304	IRIS_313-9709	141.41	13.3892	-9.11573	1e-05	0.99999	indica	non-glutinous	3058929	Madagascar	Madagascar	P	IOC	XI-2
305	IRIS_313-9723	120.469	32.9693	-76.7028	1e-05	0.99999	indica	non-glutinous	3058915	China	China	0	EAS	XI-1A
306	IRIS_313-9727	71.577	-81.4281	-45.9752	3.6e-05	0.999964	indica	non-glutinous	3058911	China	China	0	EAS	XI-1A
307	IRIS_313-9730	128.156	34.5367	-81.3449	0.000283	0.999717	indica	non-glutinous	3058773	China	China	0	EAS	XI-1A
308	IRIS_313-9732	101.085	-67.5797	-17.9863	0.000284	0.999716	indica	non-glutinous	3058771	Madagascar	Madagascar	0	IOC	XI-2
309	IRIS_313-9758	117.045	32.4813	-73.7682	0.000302	0.999698	indica	non-glutinous	3058744	Taiwan	Taiwan	0	EAR	XI-1A
310	IRIS_313-9767	38.965	56.3739	53.3926	0.000356	0.999644	indica	non-glutinous	3058735	United States of America	United States of America	I	NAM	XI-adm
311	IRIS_313-9778	50.2134	-165.771	-5.12761	0.000618	0.999382	indica	non-glutinous	3058722	Argentina	Argentina	P	SAM	admix
312	IRIS_313-9791	134.535	25.0975	-43.7926	0.000693	0.999307	indica	non-glutinous	3058709	Malawi	Malawi	0	EAF	XI-adm
313	IRIS_313-9795	88.0157	26.9245	-37.9789	0.000743	0.999257	indica	non-glutinous	3058705	Australia	Australia	I	OCE	XI-2
314	IRIS_313-9822	129.998	36.2618	-63.2233	0.00093	0.99907	indica	non-glutinous	3058678	Venezuela	Venezuela	P	SAM	XI-1A
315	IRIS_313-9825	135.31	22.87	-4.11658	0.001033	0.998967	indica	non-glutinous	3058675	Peru	Peru	0	SAM	XI-2
316	IRIS_313-9832	118.822	2.00004	-10.8567	0.001043	0.998957	indica	non-glutinous	3058668	Sri Lanka	Sri Lanka	T	IOC	XI-2
317	IRIS_313-9841	33.5989	33.0549	10.3039	0.001058	0.998942	indica	non-glutinous	3058659	Surinam	Surinam	I	SAM	XI-adm
318	IRIS_313-9862	124.257	-24.0705	-25.2373	0.001065	0.998935	indica	non-glutinous	3058638	Sri Lanka	Sri Lanka	T	IOC	XI-2
319	IRIS_313-9867	143.993	45.7393	20.1687	0.001079	0.998921	indica	non-glutinous	3058633	Sri Lanka	Sri Lanka	T	IOC	XI-1B
320	IRIS_313-9898	139.332	61.7985	30.3458	0.001096	0.998904	indica	non-glutinous	3058601	Portugal	Portugal	0	EUR	XI-3
321	IRIS_313-9922	113.381	50.82	-36.0232	0.001097	0.998903	indica	non-glutinous	3058578	Korea, Republic of	Korea, Republic of	I	EAR	XI-1B
322	IRIS_313-9924	138.611	53.3648	-16.1897	0.001186	0.998814	indica	non-glutinous	3058576	Korea, Republic of	Korea, Republic of	I	EAR	XI-adm
323	IRIS_313-9925	112.64	19.2425	-40.3355	0.001251	0.998749	indica	non-glutinous	3058575	Korea, Republic of	Korea, Republic of	I	EAR	XI-1B
324	IRIS_313-9926	131.044	25.1583	-1.56706	0.001317	0.998683	indica	non-glutinous	3058574	Chad	Chad	T	NAF	XI-adm
325	IRIS_313-9936	144.862	46.4535	5.53049	0.00133	0.99867	indica	non-glutinous	3058563	Sri Lanka	Sri Lanka	0	IOC	XI-2
326	IRIS_313-9940	140.412	55.1924	0.0519384	0.001349	0.998651	indica	non-glutinous	3058559	Guatemala	Guatemala	0	CAM	XI-1B
327	IRIS_313-9953	142.114	66.4161	8.29081	0.001357	0.998643	indica	non-glutinous	3058546	Mexico	Mexico	I	CAM	XI-adm
328	IRIS_313-9966	142.295	59.9911	-3.28014	0.001397	0.998603	indica	non-glutinous	3058533	Colombia	Colombia	P	SAM	XI-1B
329	IRIS_313-9968	137.786	30.075	-32.2999	0.001425	0.998575	indica	non-glutinous	3058531	Sri Lanka	Sri Lanka	T	IOC	XI-adm
330	IRIS_313-9970	136.588	-12.8542	-33.3333	0.001457	0.998543	indica	non-glutinous	3058529	Sri Lanka	Sri Lanka	T	IOC	XI-2
331	IRIS_313-9976	130.97	45.9072	-70.6566	0.001462	0.998538	indica	non-glutinous	3058523	Korea, Republic of	Korea, Republic of	T	EAR	XI-1A
332	IRIS_313-9986	132.128	33.0092	19.9407	0.001494	0.998506	indica	non-glutinous	3058513	Guinea-Bissau	Guinea-Bissau	T	WAF	XI-adm
333	IRIS_313-9989	145.533	65.7956	17.2459	0.001516	0.998484	indica	non-glutinous	3058510	Cote d'Ivoire	Cote d'Ivoire	T	WAF	XI-3
334	IRIS_313-10000	104.388	58.0665	-17.5844	0.001569	0.998431	indica	glutinous	3058499	Korea, Republic of	Korea, Republic of	I	EAR	XI-1B
335	IRIS_313-10001	126.421	38.9008	-4.59523	0.00162	0.99838	indica	non-glutinous	3058498	Taiwan	Taiwan	I	EAR	XI-1B
336	IRIS_313-10007	128.698	46.7686	4.40796	0.001627	0.998373	indica	non-glutinous	3058491	Nepal	Nepal	T	SAC	XI-adm
337	IRIS_313-10010	135.609	7.86018	-6.96233	0.00165	0.99835	indica	non-glutinous	3058488	Fiji	Fiji	T	OCE	XI-2
338	IRIS_313-10016	128.9	55.2357	-23.6887	0.001803	0.998197	indica	non-glutinous	3058482	Iran	Iran	T	WAS	XI-adm
339	IRIS_313-10026	76.1852	-50.9715	-29.3135	0.00182	0.99818	indica	non-glutinous	3058472	Madagascar	Madagascar	0	IOC	XI-2
340	IRIS_313-10032	-177.378	-80.8709	3.06051	0.001828	0.998172	japonica	non-glutinous	3058462	Madagascar	Madagascar	0	IOC	cB (Bas)
341	IRIS_313-10034	136.44	44.1763	-11.0674	0.001915	0.998085	indica	non-glutinous	3058459	Niger	Niger	0	WAF	XI-adm
342	IRIS_313-10035	23.7376	21.7715	-22.4731	0.001945	0.998055	indica	non-glutinous	3058458	Madagascar	Madagascar	0	IOC	XI-2
343	IRIS_313-10045	141.228	30.6112	5.93609	0.001979	0.998021	indica	non-glutinous	3058447	Gambia	Gambia	T	WAF	XI-adm
344	IRIS_313-10046	140.108	29.7194	0.853111	0.002092	0.997908	indica	non-glutinous	3058446	Zambia	Zambia	T	EAF	XI-1B
345	IRIS_313-10047	128.419	43.8704	-70.1325	0.002151	0.997849	indica	non-glutinous	3058445	Nigeria	Nigeria	T	WAF	XI-1A
346	IRIS_313-10048	97.6992	-31.9791	19.2854	0.002203	0.997797	indica	non-glutinous	3058444	Benin	Benin	T	WAF	XI-adm
347	IRIS_313-10050	124.435	-4.32643	11.1397	0.002404	0.997596	indica	non-glutinous	3058442	Madagascar	Madagascar	T	IOC	XI-adm
348	IRIS_313-10054	92.0979	46.7196	-20.9162	0.00246	0.99754	indica	non-glutinous	3058438	Panama	Panama	P	CAM	XI-adm
349	IRIS_313-10103	85.4648	16.2481	-48.219	0.002487	0.997513	indica	non-glutinous	3058388	Korea, Republic of	Korea, Republic of	P	EAR	XI-adm
350	IRIS_313-10113	124.992	46.8773	45.854	0.002545	0.997455	indica	non-glutinous	3058378	Mozambique	Mozambique	0	EAF	XI-adm
351	IRIS_313-10114	44.5163	-78.283	-3.89256	0.002648	0.997352	indica	non-glutinous	3058377	Burundi	Burundi	I	EAF	XI-2
352	IRIS_313-10129	123.377	33.3605	-63.4389	0.002748	0.997252	indica	non-glutinous	3058360	China	China	0	EAS	XI-1A
353	IRIS_313-10134	136.825	52.0216	32.2848	0.0029	0.9971	indica	non-glutinous	3058355	Thailand	Thailand	0	SEA	XI-3
354	IRIS_313-10147	146.615	69.7772	32.1841	0.002914	0.997086	indica	non-glutinous	0	Thailand	Thailand	I	SEA	XI-3
355	IRIS_313-10148	131.581	34.1667	-56.3435	0.002989	0.997011	indica	non-glutinous	3058341	India	India	P	SAC	XI-adm
356	IRIS_313-10151	141.506	62.6646	28.6886	0.003251	0.996749	indica	non-glutinous	3058338	Thailand	Thailand	I	SEA	XI-3
357	IRIS_313-10154	134.824	50.0293	-75.6488	0.003254	0.996746	indica	non-glutinous	3058335	China	China	0	EAS	XI-1A
358	IRIS_313-10161	137.906	52.2092	-10.0152	0.003377	0.996623	indica	non-glutinous	3058328	Brazil	Brazil	I	SAM	XI-1B
359	IRIS_313-10167	130.978	41.1949	-9.24104	0.00342	0.99658	indica	non-glutinous	3058322	Philippines	Philippines	I	SER-IRRI	XI-adm
360	IRIS_313-10168	143.724	49.1173	-32.4991	0.003507	0.996493	indica	non-glutinous	3058321	China	China	0	EAS	XI-adm
361	IRIS_313-10170	136.755	45.5804	-73.7195	0.003571	0.996429	indica	non-glutinous	3058319	China	China	0	EAS	XI-1A
362	IRIS_313-10171	110.31	32.0839	-44.0918	0.003591	0.996409	indica	non-glutinous	3058318	China	China	0	EAS	XI-1A
363	IRIS_313-10177	128.433	43.9675	-3.12609	0.003693	0.996307	indica	non-glutinous	3058312	China	China	0	EAS	XI-adm
364	IRIS_313-10178	110.128	25.268	-54.5606	0.003772	0.996228	indica	non-glutinous	3058311	China	China	0	EAS	XI-1A
365	IRIS_313-10179	138.926	48.6546	-12.7965	0.003831	0.996169	indica	non-glutinous	3058310	China	China	0	EAS	XI-adm
366	IRIS_313-10189	126.023	47.4569	-56.9607	0.003837	0.996163	indica	non-glutinous	3058300	China	China	0	EAS	XI-1A
367	IRIS_313-10190	116.412	22.8555	-60.0394	0.003918	0.996082	indica	non-glutinous	3058299	China	China	0	EAS	XI-1A
368	IRIS_313-10191	125.07	39.9214	-38.2135	0.003952	0.996048	indica	non-glutinous	3058298	China	China	0	EAS	XI-1A
369	IRIS_313-10196	-252.599	45.9186	72.4754	0.00398	0.99602	japonica	non-glutinous	0	China	China	0	EAS	GJ-trp
370	IRIS_313-10211	135.881	37.8395	-72.5897	0.004006	0.995994	indica	non-glutinous	3058277	China	China	0	EAS	XI-1A
371	IRIS_313-10221	133.432	54.7867	-26.3552	0.004079	0.995921	indica	non-glutinous	3058266	China	China	0	EAS	XI-adm
372	IRIS_313-10226	120.154	43.7039	-14.1386	0.00422	0.99578	indica	non-glutinous	3058261	China	China	0	EAS	XI-adm
373	IRIS_313-10234	121.522	44.3593	-16.845	0.004243	0.995757	indica	non-glutinous	3058253	Philippines	Philippines	I	SER-IRRI	XI-1B
374	IRIS_313-10235	129.174	37.8193	4.20359	0.004383	0.995617	indica	non-glutinous	3058252	Philippines	Philippines	I	SER-IRRI	XI-adm
375	IRIS_313-10237	134.095	46.4129	-29.0844	0.004725	0.995275	indica	non-glutinous	0	Philippines	Philippines	I	SER-IRRI	XI-1B
376	IRIS_313-10238	133.746	41.9362	-25.0288	0.004897	0.995103	indica	non-glutinous	3058249	Philippines	Philippines	I	SER-IRRI	XI-1B
377	IRIS_313-10239	122.129	43.3121	-21.1032	0.00492	0.99508	indica	non-glutinous	3058248	China	China	0	EAS	XI-adm
378	IRIS_313-8315	131.145	50.772	-1.97179	0.005003	0.994997	indica	non-glutinous	0	India	India	0	SAC	XI-adm
379	IRIS_313-8332	133.132	21.0042	-18.9438	0.005295	0.994705	indica	non-glutinous	3060189	India	India	0	SAC	XI-adm
380	IRIS_313-8414	89.4405	23.8663	-28.9835	0.005382	0.994618	indica	non-glutinous	3060116	India	India	0	SAC	XI-adm
381	IRIS_313-8530	120.444	4.52889	13.2312	0.00558	0.99442	indica	non-glutinous	3060001	India	India	T	SAC	XI-2
382	IRIS_313-8606	128.523	46.5332	56.8572	0.005612	0.994388	indica	non-glutinous	3059930	India	India	P	SAC	XI-3
383	IRIS_313-8638	141.048	63.6529	15.4406	0.005641	0.994359	indica	glutinous	3059900	Unites States of America	Lao People's Democratic Republic	0	SEA	XI-3
384	IRIS_313-8657	127.988	11.933	11.577	0.005682	0.994318	indica	non-glutinous	3059878	Thailand	India	P	SAC	XI-adm
385	IRIS_313-8699	110.811	10.3185	19.8073	0.00575	0.99425	indica	non-glutinous	3059839	Sierra Leone	Sri Lanka	T	IOC	XI-adm
386	IRIS_313-8723	132.392	52.7407	46.5885	0.005764	0.994236	indica	non-glutinous	3059819	Philippines	Malaysia	T	SER	XI-3
387	IRIS_313-9091	114.31	11.9684	7.47819	0.005984	0.994016	indica	non-glutinous	2667016	_no_info	Sri Lanka	T	IOC	XI-adm
388	IRIS_313-9156	138.527	22.7311	-11.4925	0.006169	0.993831	indica	non-glutinous	3059427	China	Bangladesh	I	SAE	XI-2
389	IRIS_313-9160	133.538	54.0375	33.8967	0.006339	0.993661	indica	non-glutinous	3059426	Thailand	Senegal	0	WAF	XI-3
390	IRIS_313-9249	-264.125	46.3148	-172.686	0.006485	0.993515	japonica	glutinous	3059350	Uzbekistan	Cambodia	0	SEA	GJ-tmp
391	IRIS_313-9273	132.543	59.1708	38.6714	0.006648	0.993352	indica	non-glutinous	0	Portugal	Indonesia	0	SER	XI-3
392	IRIS_313-9409	128.525	48.6333	50.0213	0.006751	0.993249	indica	non-glutinous	3059202	Brazil	Malaysia	T	SER	XI-3
393	IRIS_313-9740	32.9522	-76.9664	-10.9335	0.006784	0.993216	indica	non-glutinous	3058762	Sierra Leone	Madagascar	T	IOC	XI-2
394	IRIS_313-10109	135.639	61.4459	42.1772	0.006803	0.993197	indica	non-glutinous	3058382	India	Nigeria	T	WAF	XI-3
395	IRIS_313-8291	141.599	55.2909	47.0209	0.006994	0.993006	indica	non-glutinous	0	Indonesia	Indonesia	T	SER	XI-3
396	IRIS_313-8293	133.8	49.363	34.4557	0.007147	0.992853	indica	non-glutinous	3060225	Senegal	Senegal	0	WAF	XI-3
397	IRIS_313-8305	138.06	-17.8351	-18.2871	0.007155	0.992845	indica	non-glutinous	3060214	India	India	T	SAC	XI-2
398	IRIS_313-8312	126.254	40.1489	48.5611	0.007233	0.992767	indica	non-glutinous	3060208	Malaysia	Malaysia	T	SER	XI-3
399	IRIS_313-8386	133.786	31.5535	-13.2247	0.007257	0.992743	indica	non-glutinous	3060143	India	India	0	SAC	XI-adm
400	IRIS_313-8391	125.281	-0.973229	5.31985	0.007358	0.992642	indica	non-glutinous	0	Burkina Faso	Burkina Faso	0	WAF	XI-2
401	IRIS_313-8407	122.708	39.1045	44.0025	0.007501	0.992499	indica	non-glutinous	0	Malaysia	Malaysia	T	SER	XI-3
402	IRIS_313-8466	131.101	61.348	33.8485	0.007577	0.992423	indica	non-glutinous	0	Thailand	Thailand	T	SEA	XI-3
403	IRIS_313-8468	134.411	56.1951	48.0676	0.007594	0.992406	indica	non-glutinous	3060064	Malaysia	Malaysia	T	SER	XI-3
404	IRIS_313-8493	132.591	47.3936	39.1205	0.007607	0.992393	indica	non-glutinous	3060039	Indonesia	Indonesia	T	SER	XI-3
405	IRIS_313-8557	138.338	68.2502	47.2023	0.007888	0.992112	indica	non-glutinous	3059976	Malaysia	Malaysia	T	SER	XI-3
406	IRIS_313-8571	132.057	57.5689	26.9193	0.008085	0.991915	indica	non-glutinous	3059963	Tanzania	Tanzania	T	EAF	XI-3
407	IRIS_313-8591	121.999	59.0686	52.8721	0.008416	0.991584	indica	non-glutinous	3059945	Malaysia	Malaysia	T	SER	XI-3
408	IRIS_313-8595	56.9004	-76.0778	-17.0638	0.00843	0.99157	indica	non-glutinous	3059941	Madagascar	Madagascar	0	IOC	XI-2
409	IRIS_313-8608	139.492	58.8243	44.7722	0.008475	0.991525	indica	non-glutinous	3059928	Indonesia	Indonesia	T	SER	XI-3
410	IRIS_313-8681	131.229	61.4457	54.9183	0.008575	0.991425	indica	non-glutinous	0	Guinea	Guinea	T	WAF	XI-3
411	IRIS_313-8683	141.374	33.5777	-3.99109	0.00899	0.99101	indica	non-glutinous	3059852	Bangladesh	Bangladesh	T	SAE	XI-2
412	IRIS_313-8702	144.478	61.0442	34.5154	0.009121	0.990879	indica	non-glutinous	0	Thailand	Thailand	T	SEA	XI-3
413	IRIS_313-8703	140.561	30.4845	-8.22177	0.009251	0.990749	indica	non-glutinous	2666805	Bangladesh	Bangladesh	P	SAE	XI-2
414	IRIS_313-8713	138.625	59.4584	44.1867	0.009348	0.990652	indica	non-glutinous	3059828	Indonesia	Indonesia	T	SER	XI-3
415	IRIS_313-8722	148.063	61.776	24.0968	0.00984	0.99016	indica	glutinous	0	Thailand	Thailand	T	SEA	XI-3
416	IRIS_313-8725	135.537	71.503	44.9375	0.00995	0.99005	indica	non-glutinous	3059817	Indonesia	Indonesia	T	SER	XI-3
417	IRIS_313-8727	124.098	-2.83337	-29.0672	0.009963	0.990037	indica	non-glutinous	3059815	India	India	T	SAC	XI-2
418	IRIS_313-8733	129.442	-1.01331	-10.0414	0.010347	0.989653	indica	non-glutinous	0	Bangladesh	Bangladesh	T	SAE	XI-2
419	IRIS_313-8751	147.518	68.4656	21.7598	0.010892	0.989108	indica	non-glutinous	3059793	Myanmar	Myanmar	0	SEA	XI-3
420	IRIS_313-8767	140.809	58.9246	35.8804	0.010946	0.989054	indica	non-glutinous	0	Indonesia	Indonesia	T	SER	XI-3
421	IRIS_313-8781	93.9283	58.1784	56.6164	0.011482	0.988518	indica	non-glutinous	3059766	Malaysia	Malaysia	T	SER	XI-3
422	IRIS_313-8785	148.459	62.0838	35.0621	0.011546	0.988454	indica	non-glutinous	0	Thailand	Thailand	T	SEA	XI-3
423	IRIS_313-8793	144.977	49.3918	31.2161	0.012006	0.987994	indica	non-glutinous	3059757	Myanmar	Myanmar	0	SEA	XI-3
424	IRIS_313-8811	125.006	55.0237	50.8161	0.01242	0.98758	indica	non-glutinous	3059738	Malaysia	Malaysia	T	SER	XI-3
425	IRIS_313-8831	143.671	61.1416	42.4692	0.012605	0.987395	indica	non-glutinous	0	Indonesia	Indonesia	T	SER	XI-3
426	IRIS_313-8833	139.435	51.8942	33.7248	0.012654	0.987346	indica	non-glutinous	3059718	Indonesia	Indonesia	T	SER	XI-3
427	IRIS_313-8922	129.877	21.9553	6.29351	0.01305	0.98695	indica	non-glutinous	0	Indonesia	Indonesia	T	SER	XI-2
428	IRIS_313-9005	139.672	53.6939	32.6269	0.013205	0.986795	indica	non-glutinous	3059554	Indonesia	Indonesia	T	SER	XI-3
429	IRIS_313-9049	114.933	7.25894	-4.25581	0.013336	0.986664	indica	non-glutinous	0	Bangladesh	Bangladesh	P	SAE	XI-2
430	IRIS_313-9097	139.345	52.3227	36.3523	0.014155	0.985845	indica	non-glutinous	0	Indonesia	Indonesia	T	SER	XI-3
431	IRIS_313-9098	135.276	54.5446	35.6206	0.014523	0.985477	indica	non-glutinous	0	Indonesia	Indonesia	T	SER	XI-3
432	IRIS_313-9102	126.249	55.7968	49.4817	0.015139	0.984861	indica	non-glutinous	3059474	Malaysia	Malaysia	T	SER	XI-3
433	IRIS_313-9117	133.636	56.8943	31.46	0.015203	0.984797	indica	non-glutinous	3059459	Indonesia	Indonesia	T	SER	XI-3
434	IRIS_313-9131	140.969	53.6474	32.4974	0.015451	0.984549	indica	non-glutinous	4494503	Viet Nam	Viet Nam	0	SEA	XI-3
435	IRIS_313-9188	134.037	56.7023	38.9623	0.0155	0.9845	indica	non-glutinous	3059404	Indonesia	Indonesia	T	SER	XI-3
436	IRIS_313-9288	143.278	57.7053	35.6638	0.016117	0.983883	indica	non-glutinous	0	Thailand	Thailand	T	SEA	XI-3
437	IRIS_313-9294	136.174	18.7204	7.81233	0.016165	0.983835	indica	non-glutinous	3059309	Gambia	Gambia	0	WAF	XI-2
438	IRIS_313-9310	140.267	51.5266	33.623	0.016259	0.983741	indica	non-glutinous	3059295	Indonesia	Indonesia	T	SER	XI-3
439	IRIS_313-9329	137.001	70.73	40.9005	0.016348	0.983652	indica	non-glutinous	3059277	Indonesia	Indonesia	T	SER	XI-3
440	IRIS_313-9360	141.998	15.0071	-1.13714	0.0167	0.9833	indica	non-glutinous	0	India	India	0	SAC	XI-2
441	IRIS_313-9397	128.604	22.8557	3.32247	0.016888	0.983112	indica	non-glutinous	0	Bangladesh	Bangladesh	P	SAE	XI-2
442	IRIS_313-9402	143.137	42.8959	14.6762	0.017005	0.982995	indica	non-glutinous	3059206	Sierra Leone	Sierra Leone	T	WAF	XI-adm
443	IRIS_313-9406	146.188	58.0218	34.0225	0.018875	0.981125	indica	non-glutinous	0	Thailand	Thailand	T	SEA	XI-3
444	IRIS_313-9429	129.667	44.8979	-26.6241	0.019134	0.980866	indica	non-glutinous	3059183	Viet Nam	Viet Nam	0	SEA	XI-adm
445	IRIS_313-9619	141.864	35.5363	7.29141	0.019295	0.980705	indica	non-glutinous	0	India	India	0	SAC	XI-adm
446	IRIS_313-9685	108.79	41.1505	13.0765	0.019356	0.980644	indica	non-glutinous	0	Union of Soviet Socialist Republics (Former)	Union of Soviet Socialist Republics (Former)	0	WAS	XI-adm
447	IRIS_313-9694	133.933	62.4032	40.1516	0.019845	0.980155	indica	non-glutinous	3058944	Malaysia	Malaysia	T	SER	XI-3
448	IRIS_313-9699	131.284	49.1104	47.7122	0.020013	0.979987	indica	non-glutinous	3058939	Malaysia	Malaysia	T	SER	XI-3
449	IRIS_313-9831	128.4	-0.796182	-37.0207	0.020067	0.979933	indica	non-glutinous	3058669	Sri Lanka	Sri Lanka	T	IOC	XI-adm
450	IRIS_313-9935	131.302	12.6714	2.94616	0.020128	0.979872	indica	non-glutinous	3058564	Guyana	Guyana	0	SAM	XI-2
451	IRIS_313-9944	122.85	-5.09913	-10.9755	0.020208	0.979792	indica	non-glutinous	3058555	Solomon Islands	Solomon Islands	0	OCE	XI-adm
452	IRIS_313-10220	132.257	44.0141	-20.0879	0.020466	0.979534	indica	non-glutinous	3058267	Brazil	Brazil	0	SAM	XI-adm
453	IRIS_313-9190	135.607	41.0584	1.68124	0.021099	0.978901	indica	non-glutinous	3059402	India	India	0	SAC	XI-adm
454	IRIS_313-9062	133.314	55.6108	13.0218	0.021168	0.978832	indica	glutinous	3059501	Thailand	Thailand	T	SEA	XI-3
455	IRIS_313-8486	-264.419	31.367	-29.6416	0.021918	0.978082	japonica	non-glutinous	3060046	Bhutan	Bhutan	T	SAE	GJ-sbtrp
456	IRIS_313-8873	-109.192	50.6549	-116.787	0.022084	0.977916	japonica	non-glutinous	3059679	Taiwan	Taiwan	0	EAR	admix
457	IRIS_313-8923	-281.152	56.6695	49.4246	0.022791	0.977209	japonica	non-glutinous	3059634	United States of America	United States of America	I	NAM	GJ-trp
458	IRIS_313-9523	-292.526	53.2626	-73.0432	0.022846	0.977154	japonica	glutinous	2666794	Japan	Japan	I	EAR	GJ-adm
459	IRIS_313-9978	-175.867	-80.3913	2.63647	0.023658	0.976342	japonica	non-glutinous	0	Madagascar	Madagascar	I	IOC	cB (Bas)
460	IRIS_313-9995	-255.388	56.9802	47.4497	0.023913	0.976087	japonica	glutinous	3058504	Korea, Republic of	Korea, Republic of	I	EAR	GJ-trp
461	IRIS_313-8444	-283.709	45.7677	-94.1724	0.024494	0.975506	japonica	non-glutinous	3060086	United States of America	United States of America	I	NAM	GJ-tmp
462	IRIS_313-8502	-256.923	47.4045	-138.657	0.024581	0.975419	japonica	non-glutinous	3060029	United States of America	United States of America	I	NAM	GJ-tmp
463	IRIS_313-8665	-293.633	50.3904	-120.101	0.024953	0.975047	japonica	non-glutinous	3059870	United States of America	United States of America	I	NAM	GJ-tmp
464	IRIS_313-8669	-280.217	40.5457	29.0891	0.025629	0.974371	japonica	non-glutinous	3059867	United States of America	United States of America	I	NAM	GJ-adm
465	IRIS_313-8755	-309.597	59.1625	-218.618	0.025909	0.974091	japonica	non-glutinous	3059791	Japan	Japan	I	EAR	GJ-tmp
466	IRIS_313-8856	-297.226	52.6847	-141.828	0.026029	0.973971	japonica	non-glutinous	3059698	United States of America	United States of America	I	NAM	GJ-tmp
467	IRIS_313-9002	-302.837	57.5742	-213.761	0.026149	0.973851	japonica	glutinous	2666793	Japan	Japan	I	EAR	GJ-tmp
468	IRIS_313-9193	-286.1	53.6604	-38.3751	0.026519	0.973481	japonica	non-glutinous	3059399	Brazil	Brazil	0	SAM	GJ-adm
469	IRIS_313-9228	-305.618	59.3033	-210.042	0.026533	0.973467	japonica	non-glutinous	3059365	Japan	Japan	P	EAR	GJ-tmp
470	IRIS_313-9233	-289.154	50.6613	-206.429	0.026606	0.973394	japonica	non-glutinous	3059359	China	China	T	EAS	GJ-tmp
471	IRIS_313-9379	-300.649	49.1149	-169.811	0.026638	0.973362	japonica	non-glutinous	3059228	Korea, Republic of	Korea, Republic of	T	EAR	GJ-tmp
472	IRIS_313-9410	-304.52	56.7501	-185.574	0.026864	0.973136	japonica	non-glutinous	3059201	United States of America	United States of America	I	NAM	GJ-tmp
473	IRIS_313-9463	-300.456	55.9971	-216.538	0.027564	0.972436	japonica	non-glutinous	3059151	United States of America	United States of America	P	NAM	GJ-tmp
474	IRIS_313-9468	-286.813	53.7416	-201.299	0.027737	0.972263	japonica	non-glutinous	3059147	China	China	I	EAS	GJ-tmp
475	IRIS_313-9698	-304.26	57.5795	-202.111	0.028241	0.971759	japonica	non-glutinous	3058940	Democratic People's Republic of Korea	Democratic People's Republic of Korea	T	EAR	GJ-tmp
476	IRIS_313-9701	-308.999	59.8936	-225.219	0.028711	0.971289	japonica	non-glutinous	3058937	Taiwan	Taiwan	I	EAR	GJ-tmp
477	IRIS_313-9702	-296.556	59.1285	-198.081	0.029458	0.970542	japonica	non-glutinous	3058936	Taiwan	Taiwan	I	EAR	GJ-tmp
478	IRIS_313-9725	-270.032	48.4274	-175.322	0.030854	0.969146	japonica	non-glutinous	3058913	China	China	0	EAS	GJ-tmp
479	IRIS_313-9769	-304.345	55.553	-129.405	0.031073	0.968927	japonica	non-glutinous	3058733	Japan	Japan	P	EAR	GJ-tmp
480	IRIS_313-9774	-294.495	55.1746	-71.2712	0.03121	0.96879	japonica	non-glutinous	3058726	Turkey	Turkey	T	WAS	GJ-adm
481	IRIS_313-9782	-305.319	57.3693	-213.542	0.031715	0.968285	japonica	non-glutinous	3058718	Peru	Peru	P	SAM	GJ-tmp
482	IRIS_313-9790	-289.553	54.1935	-119.276	0.03253	0.96747	japonica	non-glutinous	3058710	Uruguay	Uruguay	0	SAM	GJ-tmp
483	IRIS_313-9813	-284.927	45.0664	-155.725	0.033403	0.966597	japonica	non-glutinous	3058687	Hungary	Hungary	P	EUR	GJ-tmp
484	IRIS_313-9838	-299.509	49.7902	-168.597	0.03371	0.96629	japonica	non-glutinous	3058662	New Zealand	New Zealand	0	OCE	GJ-tmp
485	IRIS_313-9839	-291.819	49.8663	-180.276	0.034457	0.965543	japonica	non-glutinous	3058661	Spain	Spain	I	EUR	GJ-tmp
486	IRIS_313-9884	-303.781	56.5007	-209.383	0.0348	0.9652	japonica	non-glutinous	3058616	Japan	Japan	0	EAR	GJ-tmp
487	IRIS_313-9886	-290.775	48.8038	-183.607	0.034924	0.965076	japonica	non-glutinous	3058614	Korea, Republic of	Korea, Republic of	T	EAR	GJ-tmp
488	IRIS_313-9887	-291.57	46.6735	-181.441	0.035733	0.964267	japonica	non-glutinous	3058613	Korea, Republic of	Korea, Republic of	T	EAR	GJ-tmp
489	IRIS_313-9890	-293.161	44.7745	-155.29	0.03728	0.96272	japonica	non-glutinous	3058610	Korea, Republic of	Korea, Republic of	T	EAR	GJ-tmp
490	IRIS_313-9891	-300.617	56.5102	-199.143	0.037463	0.962537	japonica	non-glutinous	3058609	Korea, Republic of	Korea, Republic of	T	EAR	GJ-tmp
491	IRIS_313-9937	-299.194	57.0408	-104.271	0.038339	0.961661	japonica	non-glutinous	3058562	Italy	Italy	0	EUR	GJ-tmp
492	IRIS_313-9961	-282.076	46.4558	-159.022	0.038523	0.961477	japonica	non-glutinous	3058538	Norway	Norway	0	EUR	GJ-tmp
493	IRIS_313-9963	-22.3059	-352.64	5.75573	0.039151	0.960849	japonica	non-glutinous	0	Sri Lanka	Sri Lanka	0	IOC	cA (Aus)
494	IRIS_313-9964	-295.01	45.7489	-145.326	0.039445	0.960555	japonica	non-glutinous	3058535	Georgia	Georgia	0	EUR	GJ-tmp
495	IRIS_313-9974	-295.279	51.5891	-183.369	0.039714	0.960286	japonica	non-glutinous	3058525	Korea, Republic of	Korea, Republic of	T	EAR	GJ-tmp
496	IRIS_313-9996	-299.26	59.8676	-206.426	0.040578	0.959422	japonica	non-glutinous	3058503	Korea, Republic of	Korea, Republic of	I	EAR	GJ-tmp
497	IRIS_313-10014	-290.566	55.3604	-101.292	0.040721	0.959279	japonica	non-glutinous	3058484	Italy	Italy	P	EUR	GJ-tmp
498	IRIS_313-10056	-271.273	38.6554	0.285623	0.040849	0.959151	japonica	non-glutinous	3058436	Japan	Japan	0	EAR	GJ-sbtrp
499	IRIS_313-10057	-270.689	44.0096	-187.573	0.042214	0.957786	japonica	non-glutinous	3060317	Japan	Japan	I	EAR	GJ-tmp
500	IRIS_313-10059	-290.868	53.3168	-198.873	0.043104	0.956896	japonica	non-glutinous	3058434	Korea, Republic of	Korea, Republic of	0	EAR	GJ-tmp
501	IRIS_313-10083	-296.497	57.7792	-97.9421	0.043217	0.956783	japonica	non-glutinous	3058409	Spain	Spain	0	EUR	GJ-tmp
502	IRIS_313-10084	-300.593	55.2348	-145.597	0.044156	0.955844	japonica	non-glutinous	3058408	Spain	Spain	0	EUR	GJ-tmp
503	IRIS_313-10089	-303.155	55.7867	-152.696	0.045739	0.954261	japonica	non-glutinous	3058403	Bulgaria	Bulgaria	0	EUR	GJ-tmp
504	IRIS_313-10092	-300.262	55.4259	-207.962	0.046207	0.953793	japonica	glutinous	3058400	Korea, Republic of	Korea, Republic of	T	EAR	GJ-tmp
505	IRIS_313-10093	-299.23	55.8655	-211.357	0.048751	0.951249	japonica	non-glutinous	3058399	Korea, Republic of	Korea, Republic of	T	EAR	GJ-tmp
506	IRIS_313-10097	-287.661	48.0798	-184.483	0.048801	0.951199	japonica	non-glutinous	3058394	Korea, Republic of	Korea, Republic of	T	EAR	GJ-tmp
507	IRIS_313-10119	-286.764	57.7764	-68.2161	0.049957	0.950043	japonica	non-glutinous	3058372	Italy	Italy	I	EUR	GJ-adm
508	IRIS_313-10164	-298.191	56.3381	-207.244	0.052345	0.947655	japonica	non-glutinous	3058325	China	China	0	EAS	GJ-tmp
509	IRIS_313-8481	-304.908	59.4172	-213.923	0.0531	0.9469	japonica	non-glutinous	3060051	China	China	0	EAS	GJ-tmp
510	IRIS_313-9771	-305.417	58.7965	-216.28	0.05384	0.94616	japonica	non-glutinous	3058730	Austria	Austria	P	EUR	GJ-tmp
511	IRIS_313-8277	-283.958	50.8224	118.63	0.054834	0.945166	japonica	non-glutinous	3060240	Cote d'Ivoire	Cote d'Ivoire	0	WAF	GJ-trp
512	IRIS_313-8285	-234.259	49.2866	88.5605	0.059279	0.940721	japonica	non-glutinous	3060231	United States of America	United States of America	I	NAM	GJ-trp
513	IRIS_313-8302	-156.794	-118.88	-24.6042	0.059488	0.940512	japonica	non-glutinous	3060217	Bhutan	Bhutan	T	SAE	admix
514	IRIS_313-8339	-274.767	52.4165	107.935	0.062806	0.937194	japonica	non-glutinous	3060183	United States of America	United States of America	I	NAM	GJ-trp
515	IRIS_313-8387	-283.91	45.4268	-171.143	0.065251	0.934749	japonica	glutinous	3060142	China	China	0	EAS	GJ-tmp
516	IRIS_313-8400	-259.049	54.3601	28.9497	0.065286	0.934714	japonica	glutinous	3060129	Japan	Japan	0	EAR	GJ-trp
517	IRIS_313-8434	-271.088	50.0092	103.558	0.066762	0.933238	japonica	non-glutinous	3060097	United States of America	United States of America	I	NAM	GJ-trp
518	IRIS_313-8519	-268.838	30.4581	-27.9111	0.06794	0.93206	japonica	non-glutinous	3060012	Bhutan	Bhutan	T	SAE	GJ-sbtrp
519	IRIS_313-8626	-272.742	46.1533	102.45	0.068861	0.931139	japonica	non-glutinous	3059911	Malaysia	Malaysia	T	SER	GJ-trp
520	IRIS_313-8739	25.9605	-69.0076	-5.5363	0.077727	0.922273	indica	non-glutinous	3059805	Cote d'Ivoire	Cote d'Ivoire	0	WAF	admix
521	IRIS_313-8768	-281.15	57.4167	117.886	0.081542	0.918458	japonica	non-glutinous	3059778	Cote d'Ivoire	Cote d'Ivoire	T	WAF	GJ-trp
522	IRIS_313-8778	-282.412	49.8191	111.183	0.088678	0.911322	japonica	non-glutinous	3059769	United States of America	United States of America	I	NAM	GJ-trp
523	IRIS_313-8815	-272.642	34.4723	-28.9145	0.090514	0.909486	japonica	non-glutinous	3059735	Bhutan	Bhutan	T	SAE	GJ-sbtrp
524	IRIS_313-8857	-269.776	32.7453	-29.6037	0.091196	0.908804	japonica	non-glutinous	3059697	Bhutan	Bhutan	T	SAE	GJ-sbtrp
525	IRIS_313-8876	-280.998	49.4562	116.227	0.096109	0.903891	japonica	non-glutinous	3059676	France	France	P	EUR	GJ-trp
526	IRIS_313-8884	-269.559	46.0291	8.70171	0.104608	0.895392	japonica	non-glutinous	3059668	Thailand	Thailand	T	SEA	GJ-sbtrp
527	IRIS_313-8894	-271.769	50.6869	110.691	0.113261	0.886739	japonica	glutinous	3059661	Malaysia	Malaysia	T	SER	GJ-trp
528	IRIS_313-8955	-263.586	47.1827	106.793	0.124891	0.875109	japonica	non-glutinous	3059604	Malaysia	Malaysia	T	SER	GJ-trp
529	IRIS_313-8960	-274.667	55.5578	120.107	0.132828	0.867172	japonica	non-glutinous	3059599	United States of America	United States of America	I	NAM	GJ-trp
530	IRIS_313-8976	-272.426	53.202	114.925	0.133975	0.866025	japonica	non-glutinous	3060303	United States of America	United States of America	I	NAM	GJ-trp
531	IRIS_313-8987	127.721	6.30848	-26.2407	0.138501	0.861499	indica	non-glutinous	0	Malaysia	Malaysia	T	SER	XI-adm
532	IRIS_313-9129	-266.296	47.1238	93.0603	0.141096	0.858904	japonica	non-glutinous	3059447	Indonesia	Indonesia	T	SER	GJ-trp
533	IRIS_313-9176	-284.221	45.3764	25.2733	0.150237	0.849763	japonica	non-glutinous	3059416	India	India	0	SAC	GJ-adm
534	IRIS_313-9297	-278.18	56.2958	116.753	0.151181	0.848819	japonica	non-glutinous	3059307	Liberia	Liberia	0	WAF	GJ-trp
535	IRIS_313-9366	-293.723	58.2705	-31.1491	0.152058	0.847942	japonica	non-glutinous	3059242	United States of America	United States of America	I	NAM	GJ-adm
536	IRIS_313-9375	-275.89	52.6368	118.471	0.153537	0.846463	japonica	glutinous	3059233	Malaysia	Malaysia	T	SER	GJ-trp
537	IRIS_313-9405	-264.936	42.6233	57.9896	0.153733	0.846267	japonica	non-glutinous	3059204	Indonesia	Indonesia	T	SER	GJ-trp
538	IRIS_313-9452	-277.701	52.2535	84.3793	0.161609	0.838391	japonica	non-glutinous	3059161	United States of America	United States of America	I	NAM	GJ-trp
539	IRIS_313-9491	-267.775	51.7994	106.795	0.163715	0.836285	japonica	non-glutinous	3059128	United States of America	United States of America	I	NAM	GJ-trp
540	IRIS_313-9529	-262.736	31.518	-27.1129	0.168081	0.831919	japonica	non-glutinous	3059098	Bhutan	Bhutan	T	SAE	GJ-sbtrp
541	IRIS_313-9539	-290.943	49.2236	-115.588	0.171236	0.828764	japonica	non-glutinous	3059089	United States of America	United States of America	I	NAM	GJ-tmp
542	IRIS_313-9550	-276.145	55.566	122.121	0.175489	0.824511	japonica	non-glutinous	3059076	United States of America	United States of America	I	NAM	GJ-trp
543	IRIS_313-9691	-262.1	47.576	108.078	0.178484	0.821516	japonica	non-glutinous	3058947	Indonesia	Indonesia	T	SER	GJ-trp
544	IRIS_313-9745	-277.27	55.1849	105.344	0.17855	0.82145	japonica	non-glutinous	3058757	Madagascar	Madagascar	T	IOC	GJ-trp
545	IRIS_313-9789	-252.869	55.8903	51.523	0.182838	0.817162	japonica	glutinous	3058711	Japan	Japan	0	EAR	GJ-trp
546	IRIS_313-9800	-258.58	54.354	48.7983	0.188106	0.811894	japonica	non-glutinous	3058700	Japan	Japan	P	EAR	GJ-trp
547	IRIS_313-9851	-281.947	53.6943	112.01	0.188707	0.811293	japonica	non-glutinous	3058649	Surinam	Surinam	T	SAM	GJ-trp
548	IRIS_313-9897	-287.059	49.1797	107.532	0.195077	0.804923	japonica	glutinous	3058602	Philippines	Philippines	T	SER	GJ-trp
549	IRIS_313-9980	-295.909	60.435	-25.5771	0.197879	0.802121	japonica	non-glutinous	3058519	Argentina	Argentina	0	SAM	GJ-adm
550	IRIS_313-10025	-230.556	-23.3467	-23.6652	0.199839	0.800161	japonica	non-glutinous	3058473	Madagascar	Madagascar	0	IOC	admix
551	IRIS_313-10061	-234.283	35.1232	-3.11044	0.200473	0.799527	japonica	non-glutinous	3058432	Portugal	Portugal	0	EUR	GJ-adm
552	IRIS_313-10062	-271.918	50.3637	22.1137	0.210951	0.789049	japonica	non-glutinous	3058431	Greece	Greece	0	EUR	GJ-trp
553	IRIS_313-10065	-259.153	57.1667	37.1797	0.211857	0.788143	japonica	non-glutinous	3058428	Korea, Republic of	Korea, Republic of	T	EAR	GJ-trp
554	IRIS_313-10067	-257.25	56.9934	34.253	0.212945	0.787055	japonica	glutinous	3058426	Korea, Republic of	Korea, Republic of	T	EAR	GJ-trp
555	IRIS_313-10071	-256.114	54.7695	45.9948	0.213997	0.786003	japonica	non-glutinous	3058421	Japan	Japan	T	EAR	GJ-trp
556	IRIS_313-10073	-254.542	57.8662	54.3364	0.21554	0.78446	japonica	glutinous	3058419	Japan	Japan	T	EAR	GJ-trp
557	IRIS_313-10074	-255.779	55.5702	45.6142	0.218906	0.781094	japonica	non-glutinous	3058418	Japan	Japan	T	EAR	GJ-trp
558	IRIS_313-10075	-259.154	56.8031	42.2606	0.221373	0.778627	japonica	non-glutinous	3058417	Japan	Japan	T	EAR	GJ-trp
559	IRIS_313-10076	-245.338	53.3765	35.6677	0.223031	0.776969	japonica	glutinous	3058416	Japan	Japan	T	EAR	GJ-trp
560	IRIS_313-10077	146.143	40.4918	6.35449	0.227748	0.772252	indica	non-glutinous	3058415	Japan	Japan	T	EAR	XI-adm
561	IRIS_313-10078	-259.935	58.628	34.6291	0.228107	0.771893	japonica	glutinous	3058414	Japan	Japan	T	EAR	GJ-trp
562	IRIS_313-10079	-256.151	56.7024	35.0156	0.229873	0.770127	japonica	glutinous	3058413	Japan	Japan	T	EAR	GJ-trp
563	IRIS_313-10080	-257.298	58.533	53.6216	0.233057	0.766943	japonica	glutinous	3058412	Japan	Japan	T	EAR	GJ-trp
564	IRIS_313-10082	-260.224	55.995	38.2328	0.233285	0.766715	japonica	non-glutinous	3058410	Japan	Japan	T	EAR	GJ-trp
565	IRIS_313-10094	-255.009	56.5646	36.4115	0.233752	0.766248	japonica	glutinous	3058397	Korea, Republic of	Korea, Republic of	T	EAR	GJ-trp
566	IRIS_313-10096	-255.849	54.8742	-70.3837	0.235612	0.764388	japonica	glutinous	3058395	Korea, Republic of	Korea, Republic of	T	EAR	GJ-adm
567	IRIS_313-10124	-290.297	47.1071	-170.801	0.236305	0.763695	japonica	non-glutinous	0	Korea, Republic of	Korea, Republic of	P	EAR	GJ-tmp
568	IRIS_313-10176	-272.099	44.3636	-37.9543	0.23662	0.76338	japonica	non-glutinous	3058313	Thailand	Thailand	T	SEA	GJ-sbtrp
569	IRIS_313-10228	-258.245	41.4634	-138.955	0.239674	0.760326	japonica	glutinous	3058259	China	China	0	EAS	GJ-tmp
570	IRIS_313-8279	-258.519	47.6384	98.9263	0.242433	0.757567	japonica	non-glutinous	3060238	Malaysia	Malaysia	T	SER	GJ-trp
571	IRIS_313-8323	-277.995	53.0043	117.086	0.242584	0.757416	japonica	non-glutinous	0	United States of America	United States of America	I	NAM	GJ-trp
572	IRIS_313-8381	-269.948	43.8269	106.25	0.244456	0.755544	japonica	non-glutinous	3060147	Malaysia	Malaysia	T	SER	GJ-trp
573	IRIS_313-8436	-241.343	41.2944	61.189	0.245716	0.754284	japonica	non-glutinous	3060094	Indonesia	Indonesia	T	SER	GJ-trp
574	IRIS_313-8439	-267.643	51.4555	123.653	0.248575	0.751425	japonica	non-glutinous	3060091	Malaysia	Malaysia	0	SER	GJ-trp
575	IRIS_313-8565	-261.568	47.4321	-28.5961	0.251396	0.748604	japonica	non-glutinous	3059969	Thailand	Thailand	T	SEA	GJ-sbtrp
576	IRIS_313-8572	-288.216	50.3969	94.3194	0.252619	0.747381	japonica	non-glutinous	3059962	Philippines	Philippines	T	SER	GJ-trp
577	IRIS_313-8599	-282.227	43.4776	-15.3975	0.253757	0.746243	japonica	non-glutinous	3059937	Thailand	Thailand	T	SEA	GJ-sbtrp
578	IRIS_313-8627	-285.995	56.5502	57.316	0.255986	0.744014	japonica	non-glutinous	3059910	United States of America	United States of America	I	NAM	GJ-trp
579	IRIS_313-8658	-285.894	60.0661	-32.1025	0.25625	0.74375	japonica	non-glutinous	3059877	United States of America	United States of America	I	NAM	GJ-adm
580	IRIS_313-8690	-256.663	46.0865	-133.087	0.259121	0.740879	japonica	glutinous	2666991	Viet Nam	Viet Nam	0	SEA	GJ-adm
581	IRIS_313-8694	-293.078	56.5381	121.78	0.261571	0.738429	japonica	non-glutinous	3059843	Brazil	Brazil	T	SAM	GJ-trp
582	IRIS_313-8803	-281.544	56.21	116.889	0.263201	0.736799	japonica	non-glutinous	3059746	United States of America	United States of America	I	NAM	GJ-trp
583	IRIS_313-8865	-261.231	52.1535	111.717	0.263987	0.736013	japonica	non-glutinous	3059688	Indonesia	Indonesia	T	SER	GJ-trp
584	IRIS_313-8911	-13.0498	-34.9337	39.6836	0.264392	0.735608	japonica	non-glutinous	0	Thailand	Thailand	T	SEA	admix
585	IRIS_313-8998	-209.117	18.2428	86.3526	0.265443	0.734557	japonica	non-glutinous	0	Indonesia	Indonesia	T	SER	GJ-trp
586	IRIS_313-9050	-266.867	46.8887	115.425	0.266119	0.733881	japonica	non-glutinous	3059512	Malaysia	Malaysia	T	SER	GJ-trp
587	IRIS_313-9242	-76.1042	57.2505	33.0044	0.266447	0.733553	japonica	non-glutinous	3059353	Indonesia	Indonesia	T	SER	admix
588	IRIS_313-9470	-266.512	49.2923	106.201	0.266488	0.733512	japonica	non-glutinous	3059145	Indonesia	Indonesia	T	SER	GJ-trp
589	IRIS_313-9568	-260.38	40.7019	104.749	0.267466	0.732534	japonica	non-glutinous	3059060	Malaysia	Malaysia	0	SER	GJ-trp
590	IRIS_313-9929	-268.295	47.8771	117.699	0.269697	0.730303	japonica	non-glutinous	3058571	Philippines	Philippines	T	SER	GJ-trp
591	IRIS_313-10099	-274.873	52.155	98.7614	0.269794	0.730206	japonica	non-glutinous	3058392	Madagascar	Madagascar	T	IOC	GJ-trp
592	IRIS_313-8431	-289.116	47.9623	89.6373	0.274534	0.725466	japonica	non-glutinous	3060099	Philippines	Philippines	T	SER	GJ-trp
593	IRIS_313-8580	-265.375	43.6617	-27.992	0.274571	0.725429	japonica	non-glutinous	3059956	Thailand	Thailand	T	SEA	GJ-sbtrp
594	IRIS_313-8637	-266.655	32.6643	-17.4414	0.276767	0.723233	japonica	non-glutinous	3059901	Bhutan	Bhutan	T	SAE	GJ-sbtrp
595	IRIS_313-8687	-279.874	57.4377	116.624	0.281103	0.718897	japonica	non-glutinous	3059849	Guinea-Bissau	Guinea-Bissau	T	WAF	GJ-trp
596	IRIS_313-9742	-294.085	55.7434	106.106	0.298424	0.701576	japonica	non-glutinous	3058760	Madagascar	Madagascar	T	IOC	GJ-trp
597	IRIS_313-7684	124.744	14.4594	-35.1074	0.300214	0.699786	indica	non-glutinous	3302871	Philippines	Philippines	I	SER-IRRI	XI-adm
598	IRIS_313-7688	145.012	36.4316	-34.2986	0.30544	0.69456	indica	non-glutinous	3302868	Philippines	Philippines	I	SER-IRRI	XI-1B
599	IRIS_313-7691	127.421	20.3633	-25.4132	0.308699	0.691301	indica	non-glutinous	3302865	Philippines	Philippines	I	SER-IRRI	XI-1B
600	IRIS_313-7736	125.054	5.78813	-6.54574	0.314688	0.685312	indica	non-glutinous	3302847	India	India	0	SAC	XI-2
601	IRIS_313-7690	103.235	14.167	-28.7409	0.32054	0.67946	indica	non-glutinous	3302866	Philippines	Philippines	I	SER-IRRI	XI-adm
602	IRIS_313-7780	138.72	42.9344	-27.7376	0.338404	0.661596	indica	non-glutinous	3302817	India	India	P	SAC	XI-adm
603	IRIS_313-7689	123.643	26.3728	-31.1625	0.344368	0.655632	indica	non-glutinous	3302867	Philippines	Philippines	I	SER-IRRI	XI-1B
604	IRIS_313-7685	128.269	16.875	-27.7819	0.351289	0.648711	indica	non-glutinous	3302870	Philippines	Philippines	I	SER-IRRI	XI-1B
605	IRIS_313-7883	-282.083	52.3779	93.7592	0.354977	0.645023	japonica	non-glutinous	3302329	Indonesia	Indonesia	T	SER	GJ-trp
606	IRIS_313-7933	-220.154	-38.2335	-18.0837	0.362913	0.637087	japonica	non-glutinous	3302279	Nepal	Nepal	T	SAC	admix
607	IRIS_313-7885	-261.989	39.7492	74.3855	0.369084	0.630916	japonica	non-glutinous	3302327	Indonesia	Indonesia	T	SER	GJ-trp
608	IRIS_313-11429	-271.98	48.3536	114.883	0.377237	0.622763	japonica	non-glutinous	4056087	Brazil	Brazil	0	SAM	GJ-trp
609	IRIS_313-11431	122.061	61.3789	50.1469	0.388321	0.611679	indica	non-glutinous	4056085	Philippines	Philippines	I	SER	XI-3
610	IRIS_313-11432	73.4527	-112.395	-4.24273	0.390477	0.609523	indica	non-glutinous	4056084	India	India	0	SAC	admix
611	IRIS_313-11433	129.334	35.0409	-57.5623	0.39143	0.60857	indica	non-glutinous	4056083	India	India	I	SAC	XI-1A
612	IRIS_313-11434	-281.429	56.1835	111.895	0.400083	0.599917	japonica	non-glutinous	4056082	Colombia	Colombia	T	SAM	GJ-trp
613	IRIS_313-11435	-287.067	53.419	108.248	0.406135	0.593865	japonica	non-glutinous	4056081	Cote d'Ivoire	Cote d'Ivoire	T	WAF	GJ-trp
614	IRIS_313-11436	-281.543	57.8217	118.347	0.40715	0.59285	japonica	non-glutinous	4056080	Cote d'Ivoire	Cote d'Ivoire	T	WAF	GJ-trp
615	IRIS_313-11437	136.972	54.6616	-1.45549	0.408564	0.591436	indica	non-glutinous	4056079	Mexico	Mexico	I	CAM	XI-1B
616	IRIS_313-11438	143.69	53.6042	3.86872	0.412866	0.587134	indica	non-glutinous	4056078	Mexico	Mexico	I	CAM	XI-adm
617	IRIS_313-11439	-276.003	52.7361	121.562	0.413185	0.586815	japonica	non-glutinous	4056077	Cuba	Cuba	0	CAM	GJ-trp
618	IRIS_313-11441	-265.449	51.1261	120.513	0.414903	0.585097	japonica	non-glutinous	4056075	Philippines	Philippines	T	SER	GJ-trp
619	IRIS_313-11442	137.381	42.4871	-22.0362	0.419641	0.580359	indica	non-glutinous	4112046	India	India	T	SAC	XI-adm
620	IRIS_313-11443	133.484	44.7643	-5.58668	0.430831	0.569169	indica	non-glutinous	4056074	India	India	T	SAC	XI-adm
621	IRIS_313-11445	136.29	-2.83336	-15.5202	0.43442	0.56558	indica	non-glutinous	4056072	India	India	T	SAC	XI-2
622	IRIS_313-11446	133.104	-0.0761222	-27.2189	0.441557	0.558443	indica	non-glutinous	4056071	India	India	T	SAC	XI-2
623	IRIS_313-11447	150.309	52.8323	-13.3369	0.444485	0.555515	indica	non-glutinous	4056070	India	India	T	SAC	XI-adm
624	IRIS_313-11448	116.704	-14.1179	-19.4702	0.445466	0.554534	indica	non-glutinous	4056069	India	India	T	SAC	XI-2
625	IRIS_313-11449	91.6086	-62.4961	3.18308	0.44652	0.55348	indica	non-glutinous	4056068	India	India	T	SAC	XI-adm
626	IRIS_313-11451	-154.727	-71.7966	1.36478	0.446891	0.553109	japonica	non-glutinous	4056066	India	India	T	SAC	cB (Bas)
627	IRIS_313-11452	-7.12333	-235.74	1.06575	0.452365	0.547635	japonica	non-glutinous	4056065	India	India	T	SAC	cA (Aus)
628	IRIS_313-11453	116.325	-20.0683	-19.1256	0.457579	0.542421	indica	non-glutinous	4056064	India	India	T	SAC	XI-2
629	IRIS_313-11454	-19.2886	-318.081	-1.3527	0.476251	0.523749	japonica	non-glutinous	4056063	India	India	T	SAC	cA (Aus)
630	IRIS_313-11455	-32.1803	-307.116	5.78244	0.476818	0.523182	japonica	non-glutinous	4056062	India	India	0	SAC	cA (Aus)
631	IRIS_313-11456	-11.0408	-314.737	-1.51209	0.499848	0.500152	japonica	non-glutinous	4056061	India	India	0	SAC	cA (Aus)
632	IRIS_313-11458	-7.60933	-340.392	2.2271	0.509282	0.490718	japonica	non-glutinous	4056059	India	India	T	SAC	cA (Aus)
633	IRIS_313-11460	125.446	-53.8912	-21.1506	0.526484	0.473516	indica	non-glutinous	4056057	India	India	T	SAC	XI-2
634	IRIS_313-11461	139.27	1.51178	-36.5594	0.531067	0.468933	indica	non-glutinous	4056056	India	India	T	SAC	XI-2
635	IRIS_313-11462	-13.6187	-304.784	6.80721	0.54746	0.45254	japonica	non-glutinous	4056055	India	India	T	SAC	cA (Aus)
636	IRIS_313-11463	118.413	49.1352	-10.9617	0.552995	0.447005	indica	non-glutinous	4056054	Philippines	Philippines	T	SER	XI-adm
637	IRIS_313-11464	-275.98	49.69	114.186	0.556058	0.443942	japonica	non-glutinous	4056053	Philippines	Philippines	T	SER	GJ-trp
638	IRIS_313-11465	-274.563	47.54	94.6738	0.559984	0.440016	japonica	non-glutinous	4056052	Philippines	Philippines	T	SER	GJ-trp
639	IRIS_313-11467	133.407	64.7059	38.9632	0.560307	0.439693	indica	non-glutinous	4056050	Philippines	Philippines	T	SER	XI-3
640	IRIS_313-11471	146.668	43.3176	24.7647	0.575344	0.424656	indica	non-glutinous	4056047	Philippines	Philippines	T	SER	XI-adm
641	IRIS_313-11472	134.083	56.5642	12.8556	0.577179	0.422821	indica	non-glutinous	0	Philippines	Philippines	T	SER	XI-3
642	IRIS_313-11473	-280.945	46.561	88.667	0.586912	0.413088	japonica	non-glutinous	4056046	Philippines	Philippines	T	SER	GJ-trp
643	IRIS_313-11476	-2.89036	-209.221	-2.81788	0.587097	0.412903	japonica	non-glutinous	4056043	India	India	0	SAC	cA (Aus)
644	IRIS_313-11477	-40.0282	-311.035	2.83377	0.596459	0.403541	japonica	non-glutinous	4056042	India	India	0	SAC	cA (Aus)
645	IRIS_313-11478	94.2845	-94.6291	-17.2295	0.606258	0.393742	indica	non-glutinous	4056041	India	India	0	SAC	XI-2
646	IRIS_313-11479	-240.661	43.6284	68.8644	0.607535	0.392465	japonica	non-glutinous	4056040	India	India	0	SAC	GJ-trp
647	IRIS_313-11480	123.881	38.4831	-24.5141	0.615397	0.384603	indica	non-glutinous	4056039	India	India	I	SAC	XI-1B
648	IRIS_313-11481	-9.41761	-355.179	4.20002	0.618432	0.381568	japonica	non-glutinous	4056038	Bangladesh	Bangladesh	T	SAE	cA (Aus)
649	IRIS_313-11482	12.668	-266.625	3.68265	0.620934	0.379066	indica	non-glutinous	4056037	Bangladesh	Bangladesh	T	SAE	cA (Aus)
650	IRIS_313-11483	-9.58954	-348.325	0.959578	0.621222	0.378778	japonica	non-glutinous	4056036	Bangladesh	Bangladesh	T	SAE	cA (Aus)
651	IRIS_313-11486	71.4568	-111.538	10.3092	0.626824	0.373176	indica	non-glutinous	4494484	Bangladesh	Bangladesh	T	SAE	admix
652	IRIS_313-11489	-0.901007	-219.385	-2.38664	0.630638	0.369362	japonica	non-glutinous	4056032	India	India	0	SAC	cA (Aus)
653	IRIS_313-11490	141.201	43.7886	6.4637	0.631046	0.368954	indica	non-glutinous	4056031	India	India	T	SAC	XI-adm
654	IRIS_313-11491	142.838	16.8457	-24.3757	0.631902	0.368098	indica	non-glutinous	4056030	India	India	0	SAC	XI-2
655	IRIS_313-11492	3.49449	-317.496	0.286179	0.633147	0.366853	indica	non-glutinous	4056029	India	India	0	SAC	cA (Aus)
656	IRIS_313-11493	133.602	46.7689	3.00669	0.639888	0.360112	indica	non-glutinous	4056028	India	India	T	SAC	XI-adm
657	IRIS_313-11494	-269.232	40.5545	13.4821	0.645967	0.354033	japonica	non-glutinous	4056027	India	India	T	SAC	GJ-sbtrp
658	IRIS_313-11495	-262.627	46.7633	112.475	0.655068	0.344932	japonica	non-glutinous	4056026	Indonesia	Indonesia	T	SER	GJ-trp
659	IRIS_313-11496	-258.096	40.6317	69.7232	0.655114	0.344886	japonica	non-glutinous	4056025	Indonesia	Indonesia	T	SER	GJ-trp
660	IRIS_313-11497	121.667	-31.2453	-13.2582	0.658794	0.341206	indica	non-glutinous	4054900	Indonesia	Indonesia	T	SER	XI-2
661	IRIS_313-11498	-227.384	38.9564	68.6059	0.660233	0.339767	japonica	non-glutinous	4056024	Indonesia	Indonesia	T	SER	GJ-trp
662	IRIS_313-11499	-265.001	52.35	108.988	0.664263	0.335737	japonica	non-glutinous	4056023	Indonesia	Indonesia	T	SER	GJ-trp
663	IRIS_313-11500	139.87	33.0187	-0.644164	0.670978	0.329022	indica	non-glutinous	4056022	Indonesia	Indonesia	T	SER	XI-2
664	IRIS_313-11505	136.968	17.1722	-37.7358	0.675468	0.324532	indica	non-glutinous	4056019	India	India	T	SAC	XI-2
665	IRIS_313-11506	145.79	37.7484	1.36007	0.675989	0.324011	indica	non-glutinous	4056018	India	India	T	SAC	XI-adm
666	IRIS_313-11507	119.942	38.5003	8.655	0.677751	0.322249	indica	non-glutinous	4056017	Viet Nam	Viet Nam	I	SEA	XI-1B
667	IRIS_313-11508	149.043	58.7509	2.75087	0.67826	0.32174	indica	non-glutinous	4056016	Thailand	Thailand	T	SEA	XI-3
668	IRIS_313-11509	128.476	48.0353	39.6048	0.679434	0.320566	indica	non-glutinous	4056015	Thailand	Thailand	T	SEA	XI-3
669	IRIS_313-11510	130.298	36.7635	-9.455	0.683301	0.316699	indica	non-glutinous	4056014	Sri Lanka	Sri Lanka	P	IOC	XI-adm
670	IRIS_313-11511	-279.867	44.8648	93.0353	0.684694	0.315306	japonica	non-glutinous	4056013	Philippines	Philippines	T	SER	GJ-trp
671	IRIS_313-11512	146.269	61.6678	-8.12147	0.685969	0.314031	indica	non-glutinous	4056012	Philippines	Philippines	T	SER	XI-adm
672	IRIS_313-11428	-286.733	51.7571	110.315	0.686443	0.313557	japonica	non-glutinous	4056088	Brazil	Brazil	0	SAM	GJ-trp
673	IRIS_313-11522	-284.009	41.9931	-107.464	0.686496	0.313504	japonica	non-glutinous	4056004	China	China	0	EAS	GJ-adm
674	IRIS_313-11523	146.527	51.4785	19.3238	0.687225	0.312775	indica	non-glutinous	4056003	Senegal	Senegal	T	WAF	XI-adm
675	IRIS_313-11524	-271.307	47.4353	113.87	0.687303	0.312697	japonica	non-glutinous	4056002	Cote d'Ivoire	Cote d'Ivoire	T	WAF	GJ-trp
676	IRIS_313-11525	142.47	50.1387	16.8678	0.688372	0.311628	indica	non-glutinous	4056001	Guinea-Bissau	Guinea-Bissau	T	WAF	XI-3
677	IRIS_313-11526	-283.903	51.4751	118.859	0.689775	0.310225	japonica	non-glutinous	4056000	Cote d'Ivoire	Cote d'Ivoire	T	WAF	GJ-trp
678	IRIS_313-11527	-288.332	52.0015	116.774	0.690081	0.309919	japonica	non-glutinous	4055999	Cote d'Ivoire	Cote d'Ivoire	T	WAF	GJ-trp
679	IRIS_313-11528	144.218	60.4845	13.186	0.690092	0.309908	indica	non-glutinous	4055998	Cote d'Ivoire	Cote d'Ivoire	T	WAF	XI-3
680	IRIS_313-11530	149.927	61.8239	27.8338	0.690501	0.309499	indica	non-glutinous	4055997	Thailand	Thailand	T	SEA	XI-3
681	IRIS_313-11513	142.927	53.2106	-45.469	0.693044	0.306956	indica	non-glutinous	4056011	Ecuador	Ecuador	0	SAM	XI-1B
682	IRIS_313-11532	-268.296	49.6221	115.593	0.694789	0.305211	japonica	non-glutinous	4055995	Philippines	Philippines	T	SER	GJ-trp
683	IRIS_313-11534	132.473	51.6551	44.2051	0.699289	0.300711	indica	non-glutinous	0	Thailand	Thailand	T	SEA	XI-3
684	IRIS_313-11536	-281.952	38.5861	-143.368	0.699438	0.300562	japonica	non-glutinous	4055992	Georgia	Georgia	0	EUR	GJ-tmp
685	IRIS_313-11537	-277.851	51.9107	13.6016	0.700175	0.299825	japonica	glutinous	4055991	Philippines	Philippines	I	SER	GJ-trp
686	IRIS_313-11538	97.3556	45.6725	-44.0319	0.700368	0.299632	indica	non-glutinous	4055990	Philippines	Philippines	I	SER	XI-1B
687	IRIS_313-11539	-274.876	52.4425	59.697	0.70288	0.29712	japonica	non-glutinous	4055989	Unites States of America	Unites States of America	I	NAM	GJ-trp
688	IRIS_313-11540	-284.706	46.6434	111.473	0.703123	0.296877	japonica	non-glutinous	4055988	Guinea	Guinea	T	WAF	GJ-trp
689	IRIS_313-11541	144.514	53.8848	-9.73706	0.703819	0.296181	indica	glutinous	4055987	Myanmar	Myanmar	0	SEA	XI-adm
690	IRIS_313-11542	-143.47	-48.8284	-1.24904	0.704419	0.295581	japonica	non-glutinous	4055986	Myanmar	Myanmar	0	SEA	admix
691	IRIS_313-11543	132.856	54.646	30.8624	0.705103	0.294897	indica	non-glutinous	4055985	Myanmar	Myanmar	0	SEA	XI-3
692	IRIS_313-11545	139.707	33.7733	10.4213	0.705911	0.294089	indica	non-glutinous	4055983	Myanmar	Myanmar	0	SEA	XI-adm
693	IRIS_313-11546	148.42	49.8372	-13.0676	0.707722	0.292278	indica	non-glutinous	4055982	Myanmar	Myanmar	0	SEA	XI-adm
694	IRIS_313-11548	135.175	43.4286	-6.64893	0.709019	0.290981	indica	non-glutinous	4055980	Myanmar	Myanmar	0	SEA	XI-adm
695	IRIS_313-11549	141.794	44.3182	-7.13631	0.709466	0.290534	indica	non-glutinous	4055979	Myanmar	Myanmar	0	SEA	XI-adm
696	IRIS_313-11515	135.012	32.5436	22.8805	0.709679	0.290321	indica	non-glutinous	4056009	Thailand	Thailand	I	SEA	XI-adm
697	IRIS_313-11554	132.581	48.9342	49.3201	0.70969	0.29031	indica	non-glutinous	4055976	Sierra Leone	Sierra Leone	T	WAF	XI-3
698	IRIS_313-11555	138.59	27.9794	11.9726	0.710193	0.289807	indica	non-glutinous	4055975	Sierra Leone	Sierra Leone	T	WAF	XI-adm
699	IRIS_313-11556	125.678	48.0607	49.1294	0.710194	0.289806	indica	non-glutinous	4055974	Sierra Leone	Sierra Leone	T	WAF	XI-3
700	IRIS_313-11557	-4.59019	-320.845	7.77482	0.710687	0.289313	japonica	non-glutinous	4055973	Bangladesh	Bangladesh	T	SAE	cA (Aus)
701	IRIS_313-11558	123.992	16.2645	1.86707	0.711309	0.288691	indica	non-glutinous	4055972	Bangladesh	Bangladesh	T	SAE	XI-2
702	IRIS_313-11561	121.244	-23.949	-18.7698	0.712138	0.287862	indica	non-glutinous	4055969	Nepal	Nepal	T	SAC	XI-2
703	IRIS_313-11516	146.092	39.8693	3.58055	0.713574	0.286426	indica	non-glutinous	4056008	Philippines	Philippines	I	SER-IRRI	XI-adm
704	IRIS_313-11563	123.405	-16.966	-17.141	0.714189	0.285811	indica	non-glutinous	4055968	Nepal	Nepal	T	SAC	XI-2
705	IRIS_313-11564	-193.425	-27.1805	-0.475227	0.714226	0.285774	japonica	non-glutinous	4055967	Nepal	Nepal	T	SAC	cB (Bas)
706	IRIS_313-11565	118.754	-37.6131	-16.4146	0.714431	0.285569	indica	non-glutinous	4055966	Nepal	Nepal	T	SAC	XI-2
707	IRIS_313-11566	139.689	3.58417	-26.9405	0.715474	0.284526	indica	non-glutinous	0	Nepal	Nepal	T	SAC	XI-2
708	IRIS_313-11567	-171.678	-62.3029	-0.213632	0.715725	0.284275	japonica	non-glutinous	4055965	Nepal	Nepal	T	SAC	cB (Bas)
709	IRIS_313-11568	135.308	44.5926	-64.5505	0.716703	0.283297	indica	non-glutinous	4055964	Nepal	Nepal	T	SAC	XI-1A
710	IRIS_313-11570	84.904	39.7653	-47.9419	0.717078	0.282922	indica	glutinous	4055962	China	China	P	EAS	XI-adm
711	IRIS_313-11571	-274.698	51.5958	-184.009	0.71717	0.28283	japonica	non-glutinous	4055961	China	China	0	EAS	GJ-tmp
712	IRIS_313-11517	127.691	52.6103	-7.39841	0.717635	0.282365	indica	non-glutinous	4056007	Philippines	Philippines	I	SER-IRRI	XI-1B
713	IRIS_313-11572	134.85	45.3852	-44.6415	0.717773	0.282227	indica	non-glutinous	4055960	China	China	0	EAS	XI-1A
714	IRIS_313-11573	131.491	35.6859	-32.4274	0.718434	0.281566	indica	non-glutinous	4055959	China	China	0	EAS	XI-adm
715	IRIS_313-11574	-275.537	48.7231	-182.322	0.718999	0.281001	japonica	non-glutinous	4055958	China	China	0	EAS	GJ-tmp
716	IRIS_313-11575	-283.194	46.1931	-161.515	0.71941	0.28059	japonica	non-glutinous	4055957	China	China	0	EAS	GJ-tmp
717	IRIS_313-11576	119.966	36.1033	-29.0419	0.719838	0.280162	indica	non-glutinous	4055956	China	China	0	EAS	XI-adm
718	IRIS_313-11577	126.979	36.1492	-42.0787	0.71984	0.28016	indica	non-glutinous	4055955	China	China	0	EAS	XI-1A
719	IRIS_313-11578	-265.001	44.1137	-169.348	0.721345	0.278655	japonica	non-glutinous	4055954	China	China	0	EAS	GJ-tmp
720	IRIS_313-11579	116.034	34.5964	-69.7045	0.721772	0.278228	indica	non-glutinous	4055953	China	China	0	EAS	XI-1A
721	IRIS_313-11580	115.656	43.5785	-23.5101	0.723042	0.276958	indica	non-glutinous	4055952	China	China	0	EAS	XI-adm
722	IRIS_313-11582	-262.464	46.6206	-175.06	0.723125	0.276875	japonica	non-glutinous	4055950	China	China	0	EAS	GJ-tmp
723	IRIS_313-11584	-267.262	43.7154	-171.452	0.723984	0.276016	japonica	non-glutinous	4055948	China	China	0	EAS	GJ-tmp
724	IRIS_313-11585	123.937	37.6884	-54.4242	0.724847	0.275153	indica	non-glutinous	4055947	China	China	I	EAS	XI-1A
725	IRIS_313-11586	-292.748	53.4412	-209.476	0.725029	0.274971	japonica	non-glutinous	4112013	China	China	I	EAS	GJ-tmp
726	IRIS_313-11588	123.992	58.1759	21.2972	0.725445	0.274555	indica	non-glutinous	4055945	Malaysia	Malaysia	I	SER	XI-3
727	IRIS_313-11591	-16.74	57.5901	56.8305	0.725577	0.274423	japonica	non-glutinous	4055942	Malaysia	Malaysia	0	SER	admix
728	IRIS_313-11594	144.325	48.0287	-14.4009	0.725663	0.274337	indica	non-glutinous	4055939	Viet Nam	Viet Nam	T	SEA	XI-adm
729	IRIS_313-11595	-21.9461	-295.587	1.43871	0.725769	0.274231	japonica	non-glutinous	4055938	India	India	0	SAC	cA (Aus)
730	IRIS_313-11596	66.8309	-103.374	-41.8529	0.725826	0.274174	indica	non-glutinous	4055937	India	India	0	SAC	XI-adm
731	IRIS_313-11597	121.518	-12.5132	-22.0608	0.726166	0.273834	indica	non-glutinous	4055936	India	India	0	SAC	XI-2
732	IRIS_313-11598	46.4959	-188.842	-16.1117	0.726307	0.273693	indica	non-glutinous	4055935	India	India	0	SAC	admix
733	IRIS_313-11599	142.184	31.7648	-8.99394	0.7264	0.2736	indica	non-glutinous	4055934	India	India	0	SAC	XI-2
734	IRIS_313-11600	135.73	11.198	-19.4451	0.72667	0.27333	indica	non-glutinous	4055933	India	India	0	SAC	XI-2
735	IRIS_313-11602	-11.3096	-319.16	0.579546	0.726942	0.273058	japonica	non-glutinous	4055931	India	India	0	SAC	cA (Aus)
736	IRIS_313-11603	-29.3528	-321.587	2.91323	0.727032	0.272968	japonica	non-glutinous	4055930	India	India	0	SAC	cA (Aus)
737	IRIS_313-11604	-17.5459	-316.455	3.85616	0.727097	0.272903	japonica	non-glutinous	4055929	India	India	0	SAC	cA (Aus)
738	IRIS_313-11521	114.225	35.8347	-16.235	0.727136	0.272864	indica	glutinous	4056005	Viet Nam	Viet Nam	T	SEA	XI-adm
739	IRIS_313-11616	54.0804	-127.58	-0.0688454	0.727701	0.272299	indica	non-glutinous	4055920	India	India	T	SAC	admix
740	IRIS_313-11617	-16.1901	-250.992	1.43204	0.727783	0.272217	japonica	non-glutinous	4055919	India	India	T	SAC	cA (Aus)
741	IRIS_313-11618	-6.40782	-288.078	2.10615	0.727793	0.272207	japonica	non-glutinous	4055918	India	India	T	SAC	cA (Aus)
742	IRIS_313-11619	-18.2506	-311.121	-3.32579	0.727833	0.272167	japonica	non-glutinous	4055917	India	India	T	SAC	cA (Aus)
743	IRIS_313-11620	-20.5738	-281.493	-2.84881	0.727936	0.272064	japonica	non-glutinous	4055916	India	India	T	SAC	cA (Aus)
744	IRIS_313-11621	142.591	52.0596	7.42887	0.728041	0.271959	indica	non-glutinous	4055915	India	India	T	SAC	XI-adm
745	IRIS_313-11624	137.597	45.4176	-77.9222	0.728164	0.271836	indica	non-glutinous	4055912	Nepal	Nepal	T	SAC	XI-1A
746	IRIS_313-11606	135.592	13.7809	-14.9066	0.72867	0.27133	indica	non-glutinous	4055927	India	India	0	SAC	XI-2
747	IRIS_313-11625	-129.809	-86.4571	-10.412	0.72871	0.27129	japonica	non-glutinous	4055911	Nepal	Nepal	T	SAC	cB (Bas)
748	IRIS_313-11626	-174.189	-49.0002	-3.22859	0.729482	0.270518	japonica	non-glutinous	4055910	Nepal	Nepal	T	SAC	cB (Bas)
749	IRIS_313-11627	-163.323	-68.6719	-1.6521	0.730537	0.269463	japonica	non-glutinous	4055909	Nepal	Nepal	T	SAC	cB (Bas)
750	IRIS_313-11628	-30.9899	-108.688	-10.7574	0.730798	0.269202	japonica	non-glutinous	4055908	Nepal	Nepal	T	SAC	admix
751	IRIS_313-11629	-10.8138	-300.642	1.55256	0.731109	0.268891	japonica	non-glutinous	4055907	Nepal	Nepal	T	SAC	cA (Aus)
752	IRIS_313-11630	-162.164	-72.2478	-2.71322	0.731163	0.268837	japonica	non-glutinous	4055906	Nepal	Nepal	T	SAC	cB (Bas)
753	IRIS_313-11632	-153.595	-80.2763	0.910051	0.73118	0.26882	japonica	non-glutinous	4055904	Nepal	Nepal	T	SAC	cB (Bas)
754	IRIS_313-11607	143.458	13.6356	-14.3328	0.731346	0.268654	indica	non-glutinous	4055926	India	India	0	SAC	XI-2
755	IRIS_313-11635	148.705	58.7195	7.56831	0.731573	0.268427	indica	glutinous	4055901	Thailand	Thailand	T	SEA	XI-3
756	IRIS_313-11636	-4.50261	-344.669	9.59211	0.731743	0.268257	japonica	non-glutinous	4055900	India	India	0	SAC	cA (Aus)
757	IRIS_313-11638	142.055	1.01421	-17.855	0.732079	0.267921	indica	non-glutinous	4055898	India	India	0	SAC	XI-2
758	IRIS_313-11639	126.483	23.7444	-55.3177	0.732212	0.267788	indica	non-glutinous	4055897	India	India	0	SAC	XI-adm
759	IRIS_313-11640	137.039	-3.76355	-23.0469	0.732221	0.267779	indica	non-glutinous	4055896	India	India	0	SAC	XI-2
760	IRIS_313-11641	143.821	16.193	-22.0381	0.732288	0.267712	indica	non-glutinous	4055895	India	India	0	SAC	XI-2
761	IRIS_313-11642	137.532	11.0873	-24.5388	0.73287	0.26713	indica	non-glutinous	4055894	India	India	0	SAC	XI-2
762	IRIS_313-11643	104.577	-47.5921	-19.7467	0.733121	0.266879	indica	non-glutinous	4055893	India	India	0	SAC	XI-1B
763	IRIS_313-11644	104.001	-24.0697	-35.8158	0.73335	0.26665	indica	non-glutinous	4055892	India	India	0	SAC	XI-2
764	IRIS_313-11608	127.226	41.464	49.3235	0.733468	0.266532	indica	non-glutinous	0	Thailand	Thailand	T	SEA	XI-3
765	IRIS_313-11645	123.24	-16.8119	-29.6398	0.733601	0.266399	indica	non-glutinous	4055891	India	India	0	SAC	XI-2
766	IRIS_313-11646	144.494	24.2801	-4.82494	0.73362	0.26638	indica	non-glutinous	4055890	India	India	0	SAC	XI-2
767	IRIS_313-11647	122.161	-22.4659	-25.9004	0.733671	0.266329	indica	non-glutinous	4055889	India	India	0	SAC	XI-2
768	IRIS_313-11648	146.212	17.5986	-14.9424	0.734099	0.265901	indica	non-glutinous	4055888	India	India	0	SAC	XI-2
769	IRIS_313-11650	82.3583	-6.12399	-3.54919	0.734537	0.265463	indica	non-glutinous	4055887	India	India	0	SAC	XI-2
770	IRIS_313-11651	-297.815	56.1594	-163.151	0.734752	0.265248	japonica	non-glutinous	4055886	China	China	0	EAS	GJ-tmp
771	IRIS_313-11652	-280.674	51.6979	-177.103	0.735865	0.264135	japonica	non-glutinous	4055885	China	China	0	EAS	GJ-tmp
772	IRIS_313-11653	-299.277	59.5704	-181.229	0.736235	0.263765	japonica	non-glutinous	4055884	China	China	0	EAS	GJ-tmp
773	IRIS_313-11654	-303.06	55.6835	-151.451	0.736982	0.263018	japonica	non-glutinous	4055883	China	China	0	EAS	GJ-tmp
774	IRIS_313-11609	139.374	59.3314	36.8556	0.737017	0.262983	indica	non-glutinous	4055925	Thailand	Thailand	T	SEA	XI-3
775	IRIS_313-11655	-286.519	55.7795	-106.94	0.737293	0.262707	japonica	glutinous	4055882	China	China	0	EAS	GJ-tmp
776	IRIS_313-11656	114.164	51.0165	5.40805	0.73754	0.26246	indica	non-glutinous	4055881	Indonesia	Indonesia	I	SER	XI-adm
777	IRIS_313-11657	132.618	-4.90189	-8.93048	0.737648	0.262352	indica	non-glutinous	0	Nigeria	Nigeria	0	WAF	XI-2
778	IRIS_313-11658	-291.772	50.0795	111.802	0.737784	0.262216	japonica	non-glutinous	4055880	Sierra Leone	Sierra Leone	T	WAF	GJ-trp
779	IRIS_313-11659	-282.399	52.4145	117.718	0.737787	0.262213	japonica	non-glutinous	4055879	Sierra Leone	Sierra Leone	T	WAF	GJ-trp
780	IRIS_313-11660	-274.052	52.6004	113.984	0.738209	0.261791	japonica	non-glutinous	4055878	Liberia	Liberia	T	WAF	GJ-trp
781	IRIS_313-11661	-295.713	57.6929	-173.259	0.738499	0.261501	japonica	non-glutinous	4055877	Bhutan	Bhutan	T	SAE	GJ-tmp
782	IRIS_313-11663	73.6839	-136.701	-13.5822	0.738861	0.261139	indica	non-glutinous	4055875	Zimbabwe	Zimbabwe	T	EAF	admix
783	IRIS_313-11664	137.524	48.4947	-23.8788	0.739367	0.260633	indica	glutinous	4055874	China	China	0	EAS	XI-adm
784	IRIS_313-11665	132.783	50.1614	-65.6631	0.739711	0.260289	indica	non-glutinous	4055873	China	China	0	EAS	XI-1A
785	IRIS_313-11666	125.704	33.234	-57.1115	0.740084	0.259916	indica	non-glutinous	4055872	China	China	0	EAS	XI-adm
786	IRIS_313-11667	142.794	45.0893	-51.8283	0.740242	0.259758	indica	non-glutinous	4055871	China	China	0	EAS	XI-1A
787	IRIS_313-11668	123.216	37.3802	-67.6536	0.740559	0.259441	indica	non-glutinous	4055870	China	China	0	EAS	XI-1A
788	IRIS_313-11669	92.3649	42.8627	-59.5913	0.741604	0.258396	indica	non-glutinous	4055869	China	China	I	EAS	XI-adm
789	IRIS_313-11671	128.55	-19.9134	-15.3092	0.741634	0.258366	indica	non-glutinous	4055867	Nepal	Nepal	T	SAC	XI-2
790	IRIS_313-11672	-302.591	58.2878	-220.905	0.741886	0.258114	japonica	non-glutinous	4055866	Nepal	Nepal	T	SAC	GJ-tmp
791	IRIS_313-11673	-276.045	53.5337	125.558	0.742151	0.257849	japonica	non-glutinous	4055865	Philippines	Philippines	T	SER	GJ-trp
792	IRIS_313-11674	143.146	54.0788	30.9964	0.743198	0.256802	indica	non-glutinous	4055864	Thailand	Thailand	T	SEA	XI-3
793	IRIS_313-11611	-250.228	39.8138	106.697	0.743304	0.256696	japonica	non-glutinous	4055924	Thailand	Thailand	T	SEA	GJ-trp
794	IRIS_313-11676	140.54	59.707	8.97719	0.743316	0.256684	indica	glutinous	4055862	Thailand	Thailand	T	SEA	XI-3
795	IRIS_313-11677	126.527	32.5033	2.09148	0.743507	0.256493	indica	non-glutinous	4055861	Thailand	Thailand	T	SEA	XI-3
796	IRIS_313-11678	135.483	62.6103	11.2527	0.743785	0.256215	indica	glutinous	4055860	Thailand	Thailand	T	SEA	XI-3
797	IRIS_313-11679	150.786	70.104	29.1714	0.743793	0.256207	indica	non-glutinous	4055859	Thailand	Thailand	T	SEA	XI-3
798	IRIS_313-11680	151.587	63.0838	13.3938	0.74403	0.25597	indica	non-glutinous	4112043	Thailand	Thailand	T	SEA	XI-3
799	IRIS_313-11682	135.011	58.6454	3.36983	0.744355	0.255645	indica	glutinous	4055858	Thailand	Thailand	T	SEA	XI-3
800	IRIS_313-11683	147.88	65.141	25.7498	0.744655	0.255345	indica	glutinous	4055857	Thailand	Thailand	T	SEA	XI-3
801	IRIS_313-11684	153.606	64.905	32.7954	0.744904	0.255096	indica	non-glutinous	4055856	Thailand	Thailand	T	SEA	XI-3
802	IRIS_313-11685	140.655	68.7784	10.5716	0.744908	0.255092	indica	non-glutinous	4055855	Thailand	Thailand	T	SEA	XI-3
803	IRIS_313-11686	141.319	64.3178	19.5625	0.745042	0.254958	indica	glutinous	4112042	Thailand	Thailand	T	SEA	XI-3
804	IRIS_313-11688	150.928	58.3655	14.6855	0.745877	0.254123	indica	non-glutinous	4055853	Thailand	Thailand	T	SEA	XI-3
805	IRIS_313-11689	-306.369	60.2317	-215.332	0.74615	0.25385	japonica	non-glutinous	4055852	Korea, Republic of	Korea, Republic of	0	EAR	GJ-tmp
806	IRIS_313-11690	-80.9928	29.183	-41.941	0.746253	0.253747	japonica	non-glutinous	4055851	Bhutan	Bhutan	T	SAE	admix
807	IRIS_313-11691	-272.338	36.1901	-21.3603	0.746397	0.253603	japonica	non-glutinous	4055850	Bhutan	Bhutan	T	SAE	GJ-sbtrp
808	IRIS_313-11692	133.684	43.124	-69.9096	0.746961	0.253039	indica	non-glutinous	4055849	Taiwan	Taiwan	T	EAR	XI-1A
809	IRIS_313-11693	118.633	37.4015	-10.0552	0.747025	0.252975	indica	non-glutinous	4055848	Taiwan	Taiwan	T	EAR	XI-adm
810	IRIS_313-11694	111.164	32.1133	-20.2711	0.747208	0.252792	indica	non-glutinous	4055847	Taiwan	Taiwan	T	EAR	XI-adm
811	IRIS_313-11695	124.489	45.1502	-49.8176	0.747435	0.252565	indica	non-glutinous	4055846	Taiwan	Taiwan	T	EAR	XI-1A
812	IRIS_313-11698	-180.706	-52.0231	-2.74501	0.747643	0.252357	japonica	non-glutinous	4055843	Taiwan	Taiwan	I	EAR	cB (Bas)
813	IRIS_313-11708	143.961	57.9312	35.2753	0.747803	0.252197	indica	non-glutinous	4055834	Thailand	Thailand	T	SEA	XI-3
814	IRIS_313-11709	136.119	61.0082	32.5894	0.748376	0.251624	indica	non-glutinous	4055833	Thailand	Thailand	T	SEA	XI-3
815	IRIS_313-11710	147.808	66.3373	31.8659	0.748952	0.251048	indica	non-glutinous	4054893	Thailand	Thailand	T	SEA	XI-3
816	IRIS_313-11711	139.806	64.2316	6.42053	0.750428	0.249572	indica	non-glutinous	4055832	Thailand	Thailand	T	SEA	XI-3
817	IRIS_313-11712	-0.19045	-329.343	8.95803	0.75052	0.24948	japonica	non-glutinous	4055831	India	India	0	SAC	cA (Aus)
818	IRIS_313-11713	128.735	40.4709	28.6421	0.750778	0.249222	indica	non-glutinous	4055830	Nigeria	Nigeria	P	WAF	XI-3
819	IRIS_313-11714	12.4384	34.0971	-18.803	0.750795	0.249205	indica	non-glutinous	4055829	Guyana	Guyana	0	SAM	XI-adm
820	IRIS_313-11716	115.587	31.9361	16.0331	0.75088	0.24912	indica	non-glutinous	4055828	Guinea	Guinea	T	WAF	XI-3
821	IRIS_313-11717	148.539	60.3455	25.333	0.751022	0.248978	indica	non-glutinous	4055827	Indonesia	Indonesia	T	SER	XI-adm
822	IRIS_313-11719	146.587	57.1548	20.1271	0.751119	0.248881	indica	non-glutinous	4055826	Thailand	Thailand	0	SEA	XI-3
823	IRIS_313-11720	151.721	66.0606	23.5936	0.751856	0.248144	indica	glutinous	4055825	Thailand	Thailand	0	SEA	XI-3
824	IRIS_313-11722	136.481	47.5264	-37.3301	0.752475	0.247525	indica	non-glutinous	4055823	Bangladesh	Bangladesh	T	SAE	XI-adm
825	IRIS_313-11723	134.073	19.7996	-3.70821	0.75281	0.24719	indica	non-glutinous	4055822	Guinea	Guinea	T	WAF	XI-2
826	IRIS_313-11724	140.015	43.6264	19.5854	0.752932	0.247068	indica	non-glutinous	4055821	Guinea	Guinea	T	WAF	XI-3
827	IRIS_313-11725	-309.074	59.2416	-223.347	0.753354	0.246646	japonica	non-glutinous	4055820	Japan	Japan	I	EAR	GJ-tmp
828	IRIS_313-11726	126.56	45.8146	-42.2786	0.753404	0.246596	indica	non-glutinous	4055819	China	China	0	EAS	XI-1A
829	IRIS_313-11727	134.123	47.7261	-67.9177	0.75359	0.24641	indica	non-glutinous	4055818	China	China	0	EAS	XI-1A
830	IRIS_313-11700	145.139	63.1221	12.3622	0.753642	0.246358	indica	glutinous	4055841	Thailand	Thailand	T	SEA	XI-3
831	IRIS_313-11728	159.385	65.2689	4.49153	0.753698	0.246302	indica	non-glutinous	4055817	China	China	0	EAS	XI-3
832	IRIS_313-11729	129.797	44.6813	-45.7115	0.753775	0.246225	indica	non-glutinous	4055816	China	China	0	EAS	XI-adm
833	IRIS_313-11730	128.949	49.3424	-19.4015	0.754209	0.245791	indica	non-glutinous	4055815	China	China	0	EAS	XI-adm
834	IRIS_313-11731	132.614	55.3552	-41.3906	0.756154	0.243846	indica	non-glutinous	4055814	China	China	0	EAS	XI-adm
835	IRIS_313-11732	132.433	48.4048	-72.146	0.757242	0.242758	indica	non-glutinous	4055813	China	China	0	EAS	XI-1A
836	IRIS_313-11733	129.94	48.5296	-55.4664	0.757482	0.242518	indica	non-glutinous	4055812	China	China	0	EAS	XI-1A
837	IRIS_313-11734	130.272	30.7423	-55.4863	0.757963	0.242037	indica	non-glutinous	4055811	China	China	0	EAS	XI-1A
838	IRIS_313-11735	120.507	34.3882	-18.9125	0.758337	0.241663	indica	non-glutinous	4055810	China	China	0	EAS	XI-adm
839	IRIS_313-11737	-12.3675	-256.651	-4.15079	0.758456	0.241544	japonica	non-glutinous	4055808	India	India	T	SAC	cA (Aus)
840	IRIS_313-11738	131.834	-4.69429	-24.244	0.758476	0.241524	indica	non-glutinous	4055807	India	India	T	SAC	XI-2
841	IRIS_313-11739	-282.73	55.9749	114.806	0.758672	0.241328	japonica	non-glutinous	4055806	Ghana	Ghana	T	WAF	GJ-trp
842	IRIS_313-11740	137.633	48.0753	-11.566	0.759309	0.240691	indica	non-glutinous	4055805	Ghana	Ghana	I	WAF	XI-adm
843	IRIS_313-11741	131.253	-20.5048	-32.4388	0.759714	0.240286	indica	non-glutinous	4055804	Sri Lanka	Sri Lanka	T	IOC	XI-2
844	IRIS_313-11742	-10.9154	-335.345	5.8188	0.760009	0.239991	japonica	non-glutinous	4055803	India	India	0	SAC	cA (Aus)
845	IRIS_313-11743	-160.851	-53.5798	-8.47113	0.760166	0.239834	japonica	non-glutinous	4055802	Bhutan	Bhutan	T	SAE	cB (Bas)
846	IRIS_313-11744	119.616	52.2361	-27.9424	0.760714	0.239286	indica	non-glutinous	4055801	China	China	0	EAS	XI-adm
847	IRIS_313-11745	133.859	38.5736	-65.8809	0.761713	0.238287	indica	non-glutinous	4055800	China	China	0	EAS	XI-1A
848	IRIS_313-11746	129.356	51.8204	-56.4864	0.762381	0.237619	indica	non-glutinous	4055799	China	China	0	EAS	XI-1A
849	IRIS_313-11747	142.081	47.8515	-55.6264	0.76362	0.23638	indica	non-glutinous	4055798	China	China	0	EAS	XI-adm
850	IRIS_313-11702	-304.088	62.5914	-163.745	0.764655	0.235345	japonica	non-glutinous	4055839	United States of America	United States of America	I	NAM	GJ-tmp
851	IRIS_313-11748	120.862	44.9456	-25.9738	0.764808	0.235192	indica	non-glutinous	4055797	China	China	0	EAS	XI-adm
852	IRIS_313-11750	147.445	46.7938	-37.9982	0.765338	0.234662	indica	non-glutinous	4055796	China	China	0	EAS	XI-adm
853	IRIS_313-11751	121.58	26.0663	-32.606	0.768231	0.231769	indica	glutinous	4055795	China	China	0	EAS	XI-adm
854	IRIS_313-11752	131.582	45.0559	-63.0713	0.768764	0.231236	indica	non-glutinous	4055794	China	China	0	EAS	XI-1A
855	IRIS_313-11753	120.765	29.4444	-61.7082	0.769158	0.230842	indica	non-glutinous	4055793	China	China	0	EAS	XI-1A
856	IRIS_313-11754	-88.992	-15.4861	38.0859	0.770587	0.229413	japonica	non-glutinous	4055792	Madagascar	Madagascar	0	IOC	admix
857	IRIS_313-11755	-289.356	49.8815	112.542	0.773377	0.226623	japonica	non-glutinous	4055791	Liberia	Liberia	0	WAF	GJ-trp
858	IRIS_313-11756	-275.124	47.6382	99.745	0.775385	0.224615	japonica	non-glutinous	4055790	Madagascar	Madagascar	0	IOC	GJ-trp
859	IRIS_313-11757	132.57	54.9857	23.4729	0.776856	0.223144	indica	non-glutinous	4055789	Madagascar	Madagascar	0	IOC	XI-3
860	IRIS_313-11759	-284.406	52.6947	119.598	0.785107	0.214893	japonica	non-glutinous	4055787	Cote d'Ivoire	Cote d'Ivoire	0	WAF	GJ-trp
861	IRIS_313-11760	134.053	3.10432	-2.81794	0.788673	0.211327	indica	non-glutinous	4055786	Madagascar	Madagascar	0	IOC	XI-2
862	IRIS_313-11761	132.526	-24.2366	-11.2923	0.789665	0.210335	indica	non-glutinous	4055785	Cote d'Ivoire	Cote d'Ivoire	0	WAF	XI-2
863	IRIS_313-11762	129.56	12.0652	1.88942	0.790301	0.209699	indica	non-glutinous	4055784	Madagascar	Madagascar	0	IOC	XI-2
864	IRIS_313-11763	131.912	38.2237	-40.4413	0.790485	0.209515	indica	non-glutinous	4055783	Cameroon	Cameroon	I	WAF	XI-adm
865	IRIS_313-11765	-163.577	-69.3573	-4.55418	0.794243	0.205757	japonica	non-glutinous	4055781	Liberia	Liberia	I	WAF	cB (Bas)
866	IRIS_313-11766	31.197	-159.821	-4.92152	0.803825	0.196175	indica	non-glutinous	4055780	Madagascar	Madagascar	0	IOC	admix
867	IRIS_313-11767	12.1821	-0.172074	21.149	0.810239	0.189761	indica	non-glutinous	4055779	Madagascar	Madagascar	0	IOC	admix
868	IRIS_313-11704	113.681	22.2908	7.96996	0.816669	0.183331	indica	non-glutinous	0	Thailand	Thailand	T	SEA	XI-3
869	IRIS_313-11773	138.732	37.2242	21.2789	0.81746	0.18254	indica	non-glutinous	4055773	Gambia	Gambia	0	WAF	XI-3
870	IRIS_313-11705	136.672	63.9394	10.2403	0.822069	0.177931	indica	glutinous	4055837	Thailand	Thailand	T	SEA	XI-3
871	IRIS_313-11779	139.594	63.4997	29.1231	0.834411	0.165589	indica	non-glutinous	4055767	Tanzania	Tanzania	T	EAF	XI-3
872	IRIS_313-11780	134.002	56.2974	26.9821	0.838549	0.161451	indica	non-glutinous	4055766	Tanzania	Tanzania	T	EAF	XI-3
873	IRIS_313-11782	104.516	-54.0521	-6.21225	0.839748	0.160252	indica	non-glutinous	4055764	Zambia	Zambia	T	EAF	XI-2
874	IRIS_313-11783	151.986	38.4949	5.56167	0.839759	0.160241	indica	non-glutinous	4055763	Gambia	Gambia	T	WAF	XI-adm
875	IRIS_313-11784	117.36	52.2086	-11.4501	0.84066	0.15934	indica	non-glutinous	4055762	Sierra Leone	Sierra Leone	T	WAF	XI-1B
876	IRIS_313-11785	132.41	53.0284	27.9122	0.843201	0.156799	indica	non-glutinous	4055761	Tanzania	Tanzania	T	EAF	XI-3
877	IRIS_313-11786	153.405	67.7892	19.1866	0.843319	0.156681	indica	non-glutinous	4055760	Gambia	Gambia	T	WAF	XI-3
878	IRIS_313-11787	134.846	20.1229	11.2251	0.843421	0.156579	indica	non-glutinous	4055759	Gambia	Gambia	T	WAF	XI-2
879	IRIS_313-11706	118.677	52.2469	46.878	0.848581	0.151419	indica	non-glutinous	4055836	Thailand	Thailand	T	SEA	XI-3
880	IRIS_313-11788	-268.508	46.0083	-132.579	0.849309	0.150691	japonica	glutinous	4055758	Philippines	Philippines	T	SER	GJ-adm
881	IRIS_313-11789	121.293	-27.4804	-19.1454	0.851149	0.148851	indica	non-glutinous	4055757	Madagascar	Madagascar	T	IOC	XI-2
882	IRIS_313-11790	-247.212	37.3142	78.2722	0.854226	0.145774	japonica	non-glutinous	4055756	Madagascar	Madagascar	T	IOC	GJ-trp
883	IRIS_313-11791	50.6535	-66.314	-18.5103	0.856966	0.143034	indica	non-glutinous	4055755	Madagascar	Madagascar	T	IOC	XI-2
884	IRIS_313-11707	141.242	53.2724	33.3025	0.858251	0.141749	indica	non-glutinous	4055835	Thailand	Thailand	T	SEA	XI-3
885	IRIS_313-11801	141.572	38.4199	-37.0762	0.859015	0.140985	indica	non-glutinous	4055745	China	China	0	EAS	XI-adm
886	IRIS_313-11802	127.555	31.4415	-69.4205	0.862385	0.137615	indica	non-glutinous	4055744	China	China	0	EAS	XI-1A
887	IRIS_313-11803	-278.561	48.0151	-174.142	0.862396	0.137604	japonica	non-glutinous	4055743	China	China	0	EAS	GJ-tmp
888	IRIS_313-11804	133.427	38.9734	-78.7693	0.865858	0.134142	indica	non-glutinous	4055742	China	China	0	EAS	XI-1A
889	IRIS_313-11805	134.666	40.263	-60.4713	0.866185	0.133815	indica	non-glutinous	4055741	China	China	0	EAS	XI-1A
890	IRIS_313-11806	122.141	32.6567	-71.9273	0.866577	0.133423	indica	non-glutinous	4055740	China	China	0	EAS	XI-1A
891	IRIS_313-11807	104.47	53.2897	-30.7729	0.869018	0.130982	indica	non-glutinous	4055739	Colombia	Colombia	I	SAM	XI-adm
892	IRIS_313-11808	92.5375	52.1779	-22.9011	0.869515	0.130485	indica	non-glutinous	4055738	Colombia	Colombia	I	SAM	XI-adm
893	IRIS_313-11809	-14.7644	-325.889	0.664929	0.86955	0.13045	japonica	non-glutinous	4055737	Kenya	Kenya	T	EAF	cA (Aus)
894	IRIS_313-11810	142.172	55.5599	29.0053	0.870761	0.129239	indica	non-glutinous	4055736	Kenya	Kenya	T	EAF	XI-3
895	IRIS_313-11792	-288.113	56.4366	114.371	0.870774	0.129226	japonica	non-glutinous	4055754	Madagascar	Madagascar	T	IOC	GJ-trp
896	IRIS_313-11811	133.628	-8.70464	-10.0976	0.872024	0.127976	indica	non-glutinous	4055735	Kenya	Kenya	T	EAF	XI-2
897	IRIS_313-11812	150.448	69.3743	28.8053	0.872122	0.127878	indica	non-glutinous	4055734	Kenya	Kenya	T	EAF	XI-3
898	IRIS_313-11813	138.424	38.3155	23.3885	0.872423	0.127577	indica	non-glutinous	4112041	Kenya	Kenya	T	EAF	XI-3
899	IRIS_313-11814	145.763	56.6605	34.7561	0.874458	0.125542	indica	non-glutinous	4055733	Kenya	Kenya	T	EAF	XI-3
900	IRIS_313-11815	139.901	60.4008	36.8041	0.874589	0.125411	indica	non-glutinous	4055732	Kenya	Kenya	T	EAF	XI-3
901	IRIS_313-11816	122.016	20.87	-18.008	0.874743	0.125257	indica	non-glutinous	4055731	Myanmar	Myanmar	T	SEA	XI-adm
902	IRIS_313-11817	134.193	51.892	-23.7743	0.874753	0.125247	indica	glutinous	4054891	Myanmar	Myanmar	T	SEA	XI-adm
903	IRIS_313-11818	123.236	18.916	-7.53969	0.87516	0.12484	indica	non-glutinous	4055730	Myanmar	Myanmar	T	SEA	XI-adm
904	IRIS_313-11819	142.439	54.0159	15.8844	0.875546	0.124454	indica	non-glutinous	4112040	Myanmar	Myanmar	T	SEA	XI-3
905	IRIS_313-11820	132.621	52.6337	27.7188	0.877214	0.122786	indica	non-glutinous	4055729	Myanmar	Myanmar	T	SEA	XI-3
906	IRIS_313-11793	111.447	-50.513	-12.3899	0.877568	0.122432	indica	non-glutinous	4055753	Madagascar	Madagascar	T	IOC	XI-2
907	IRIS_313-11821	130.73	2.98732	-17.0934	0.882428	0.117572	indica	non-glutinous	4055728	India	India	T	SAC	XI-2
908	IRIS_313-11822	141.289	17.3034	-22.4272	0.883104	0.116896	indica	non-glutinous	4494486	India	India	T	SAC	XI-2
909	IRIS_313-11823	138.882	-1.48577	-10.0224	0.883277	0.116723	indica	non-glutinous	4055727	India	India	T	SAC	XI-2
910	IRIS_313-11824	146.04	20.6902	-26.9871	0.88394	0.11606	indica	non-glutinous	4055726	India	India	T	SAC	XI-2
911	IRIS_313-11825	-166.595	-65.7833	-1.83734	0.886443	0.113557	japonica	non-glutinous	4494487	India	India	T	SAC	cB (Bas)
912	IRIS_313-11826	-174.415	-52.096	3.47052	0.887585	0.112415	japonica	non-glutinous	4055725	India	India	T	SAC	cB (Bas)
913	IRIS_313-11827	138.202	-3.44808	-22.2902	0.888585	0.111415	indica	non-glutinous	0	India	India	T	SAC	XI-2
914	IRIS_313-11828	141.453	4.69204	-23.3585	0.889281	0.110719	indica	non-glutinous	4055724	India	India	T	SAC	XI-2
915	IRIS_313-11829	-307.087	58.6851	-214.271	0.889677	0.110323	japonica	non-glutinous	4055723	Pakistan	Pakistan	T	SAW	GJ-tmp
916	IRIS_313-11830	136.071	57.9279	47.5397	0.890136	0.109864	indica	non-glutinous	4055722	Gambia	Gambia	T	WAF	XI-3
917	IRIS_313-11832	-271.259	46.2236	13.7743	0.893601	0.106399	japonica	non-glutinous	4055720	Thailand	Thailand	T	SEA	GJ-sbtrp
918	IRIS_313-11833	133.669	64.8228	45.0647	0.894048	0.105952	indica	non-glutinous	4055719	Thailand	Thailand	T	SEA	XI-3
919	IRIS_313-11834	-263.107	43.0207	0.94182	0.894198	0.105802	japonica	non-glutinous	4055718	Thailand	Thailand	T	SEA	GJ-sbtrp
920	IRIS_313-11835	136.604	61.6768	-11.2949	0.89424	0.10576	indica	glutinous	4055717	Thailand	Thailand	T	SEA	XI-adm
921	IRIS_313-11836	149.418	59.9796	32.6289	0.897608	0.102392	indica	non-glutinous	4055716	Thailand	Thailand	T	SEA	XI-3
922	IRIS_313-11837	133.991	54.7765	27.4742	0.898642	0.101358	indica	non-glutinous	4055715	Thailand	Thailand	T	SEA	XI-3
923	IRIS_313-11838	145.733	50.1819	29.555	0.899661	0.100339	indica	non-glutinous	4055714	Thailand	Thailand	T	SEA	XI-3
924	IRIS_313-11840	132.578	54.0896	43.1183	0.901525	0.098475	indica	glutinous	4055712	Thailand	Thailand	T	SEA	XI-3
925	IRIS_313-11795	126.952	45.0982	-76.766	0.901968	0.098032	indica	non-glutinous	4055751	China	China	0	EAS	XI-1A
926	IRIS_313-11841	147.537	62.0658	27.5787	0.902342	0.097658	indica	glutinous	4055711	Thailand	Thailand	T	SEA	XI-3
927	IRIS_313-11843	144.392	54.112	24.4646	0.903805	0.096195	indica	non-glutinous	4055709	Thailand	Thailand	T	SEA	XI-3
928	IRIS_313-11844	133.093	61.1017	15.0342	0.905395	0.094605	indica	non-glutinous	4055708	Thailand	Thailand	T	SEA	XI-3
929	IRIS_313-11845	-256.062	39.6436	-9.86591	0.90639	0.09361	japonica	glutinous	4112012	Thailand	Thailand	T	SEA	GJ-sbtrp
930	IRIS_313-11848	141.811	67.125	36.8	0.909042	0.090958	indica	glutinous	4055705	Malaysia	Malaysia	T	SER	XI-3
931	IRIS_313-11796	130.933	31.9432	-71.768	0.909499	0.090501	indica	non-glutinous	4055750	China	China	0	EAS	XI-1A
932	IRIS_313-11851	-285.129	50.0586	93.2876	0.910603	0.089397	japonica	non-glutinous	4055702	Philippines	Philippines	T	SER	GJ-trp
933	IRIS_313-11852	123.584	29.0441	-50.8884	0.912431	0.087569	indica	non-glutinous	4055701	China	China	0	EAS	XI-1A
934	IRIS_313-11853	121.244	29.1977	-47.3809	0.912447	0.087553	indica	non-glutinous	4055700	China	China	0	EAS	XI-1A
935	IRIS_313-11854	137.203	38.0744	-57.9971	0.914357	0.085643	indica	non-glutinous	4055699	China	China	0	EAS	XI-1A
936	IRIS_313-11855	119.459	33.1455	-47.1308	0.915763	0.084237	indica	non-glutinous	4055698	China	China	0	EAS	XI-1A
937	IRIS_313-11856	125.543	26.7486	-51.3401	0.917472	0.082528	indica	non-glutinous	4055697	China	China	0	EAS	XI-1A
938	IRIS_313-11857	127.355	34.696	-52.6694	0.917532	0.082468	indica	non-glutinous	4055696	China	China	0	EAS	XI-1A
939	IRIS_313-11858	138.518	55.0571	-67.3019	0.91919	0.08081	indica	non-glutinous	4055695	China	China	0	EAS	XI-1A
940	IRIS_313-11859	130.266	34.4424	-74.0913	0.919505	0.080495	indica	non-glutinous	4055694	China	China	0	EAS	XI-1A
941	IRIS_313-11860	137.018	48.7243	-72.9153	0.919512	0.080488	indica	non-glutinous	4055693	China	China	0	EAS	XI-1A
942	IRIS_313-11797	122.578	41.0643	-42.2254	0.920037	0.079963	indica	non-glutinous	4055749	China	China	0	EAS	XI-1A
943	IRIS_313-11861	127.013	37.0002	-64.2081	0.920222	0.079778	indica	non-glutinous	4055692	China	China	0	EAS	XI-1A
944	IRIS_313-11862	124.673	33.5877	-60.8114	0.921246	0.078754	indica	non-glutinous	4055691	China	China	0	EAS	XI-1A
945	IRIS_313-11863	119.33	33.6138	-45.1431	0.921859	0.078141	indica	non-glutinous	4055690	China	China	0	EAS	XI-1A
946	IRIS_313-11865	127.536	36.2817	-73.4063	0.924211	0.075789	indica	non-glutinous	4055688	China	China	0	EAS	XI-1A
947	IRIS_313-11866	126.716	37.4252	-77.9999	0.924849	0.075151	indica	non-glutinous	4055687	China	China	0	EAS	XI-1A
948	IRIS_313-11867	133.252	33.5838	-54.6555	0.925038	0.074962	indica	non-glutinous	4055686	China	China	0	EAS	XI-1A
949	IRIS_313-11868	123.837	37.1568	-50.2751	0.926333	0.073667	indica	non-glutinous	4055685	China	China	0	EAS	XI-1A
950	IRIS_313-11869	126.839	44.6867	-72.1271	0.926416	0.073584	indica	non-glutinous	4055684	China	China	0	EAS	XI-1A
951	IRIS_313-11870	128.841	36.7441	-77.7438	0.926428	0.073572	indica	non-glutinous	4111994	China	China	0	EAS	XI-1A
952	IRIS_313-11798	128.135	46.5259	5.67392	0.926472	0.073528	indica	non-glutinous	4055748	China	China	0	EAS	XI-1B
953	IRIS_313-11871	122.849	38.8773	-52.9827	0.927078	0.072922	indica	non-glutinous	4055683	China	China	0	EAS	XI-1A
954	IRIS_313-11872	99.0255	14.8196	-40.3672	0.927963	0.072037	indica	non-glutinous	4055682	China	China	0	EAS	XI-1A
955	IRIS_313-11875	-298.067	59.8301	-157.668	0.929462	0.070538	japonica	non-glutinous	4055679	Japan	Japan	0	EAR	GJ-tmp
956	IRIS_313-11876	67.9248	27.197	-57.4822	0.929888	0.070112	indica	non-glutinous	4055678	China	China	0	EAS	XI-1A
957	IRIS_313-11877	134.654	39.0551	-83.2789	0.929978	0.070022	indica	non-glutinous	4055677	China	China	0	EAS	XI-1A
958	IRIS_313-11878	125.125	28.6862	-61.0898	0.930767	0.069233	indica	non-glutinous	4055676	China	China	0	EAS	XI-1A
959	IRIS_313-11799	132.964	40.5869	-70.8256	0.931091	0.068909	indica	non-glutinous	4055747	China	China	0	EAS	XI-1A
960	IRIS_313-11881	115.142	32.0055	-75.1683	0.931588	0.068412	indica	non-glutinous	4055673	China	China	0	EAS	XI-1A
961	IRIS_313-11882	124.695	43.3374	-72.6893	0.932191	0.067809	indica	non-glutinous	4055672	China	China	0	EAS	XI-1A
962	IRIS_313-11884	130.459	36.1072	-81.2282	0.932388	0.067612	indica	non-glutinous	4055670	China	China	0	EAS	XI-1A
963	IRIS_313-11800	-293.663	52.6506	-210.31	0.932776	0.067224	japonica	non-glutinous	4055746	China	China	0	EAS	GJ-tmp
964	IRIS_313-11894	120.817	36.6207	-1.67755	0.933309	0.066691	indica	non-glutinous	4055662	Viet Nam	Viet Nam	T	SEA	XI-adm
965	IRIS_313-11895	136.181	56.0207	31.6036	0.933433	0.066567	indica	non-glutinous	4055661	Viet Nam	Viet Nam	T	SEA	XI-3
966	IRIS_313-11896	145.108	60.3565	39.9009	0.933628	0.066372	indica	non-glutinous	4055660	Viet Nam	Viet Nam	T	SEA	XI-3
967	IRIS_313-11897	-274.649	46.5668	-29.0145	0.935146	0.064854	japonica	non-glutinous	4055659	Thailand	Thailand	T	SEA	GJ-sbtrp
968	IRIS_313-11899	121.772	33.4616	-4.69258	0.935764	0.064236	indica	glutinous	4055657	Thailand	Thailand	0	SEA	XI-adm
969	IRIS_313-11900	-279.52	49.9963	-39.6961	0.935945	0.064055	japonica	glutinous	4055656	Thailand	Thailand	0	SEA	GJ-sbtrp
970	IRIS_313-11901	133.935	63.0264	41.7515	0.936263	0.063737	indica	non-glutinous	4055655	Thailand	Thailand	0	SEA	XI-3
971	IRIS_313-11902	130.67	64.3441	26.8436	0.936419	0.063581	indica	non-glutinous	4055654	Indonesia	Indonesia	0	SER	XI-3
972	IRIS_313-11903	-269.248	48.2966	121.26	0.937574	0.062426	japonica	non-glutinous	4055653	Indonesia	Indonesia	0	SER	GJ-trp
973	IRIS_313-11885	127.622	30.0981	-77.7576	0.937653	0.062347	indica	non-glutinous	4055669	China	China	0	EAS	XI-1A
974	IRIS_313-11904	129.94	63.509	50.0776	0.938299	0.061701	indica	non-glutinous	4055652	Indonesia	Indonesia	0	SER	XI-3
975	IRIS_313-11905	140.135	69.9041	42.6273	0.939203	0.060797	indica	non-glutinous	4055651	Indonesia	Indonesia	0	SER	XI-3
976	IRIS_313-11906	-263.6	47.6375	109.353	0.93934	0.06066	japonica	non-glutinous	4055650	Indonesia	Indonesia	0	SER	GJ-trp
977	IRIS_313-11907	-269.458	48.8989	89.0667	0.939635	0.060365	japonica	non-glutinous	4055649	Indonesia	Indonesia	0	SER	GJ-trp
978	IRIS_313-11908	-281.999	47.673	-147.556	0.940115	0.059885	japonica	glutinous	4055648	China	China	0	EAS	GJ-tmp
979	IRIS_313-11909	120.181	33.6957	-76.5965	0.940287	0.059713	indica	non-glutinous	4055647	China	China	0	EAS	XI-1A
980	IRIS_313-11910	128.558	30.721	-22.7578	0.94057	0.05943	indica	non-glutinous	4055646	China	China	0	EAS	XI-adm
981	IRIS_313-11911	121.842	31.2478	-59.4242	0.94059	0.05941	indica	non-glutinous	4055645	China	China	0	EAS	XI-1A
982	IRIS_313-11912	132.488	48.2698	32.4727	0.940986	0.059014	indica	non-glutinous	4055644	Brazil	Brazil	0	SAM	XI-3
983	IRIS_313-11913	-275.108	47.0366	115.099	0.941437	0.058563	japonica	non-glutinous	4055643	Philippines	Philippines	T	SER	GJ-trp
984	IRIS_313-11886	124.746	32.2902	-8.30258	0.94147	0.05853	indica	non-glutinous	4055668	Philippines	Philippines	I	SER-IRRI	XI-1B
985	IRIS_313-11915	-282.337	48.2263	85.8831	0.941627	0.058373	japonica	non-glutinous	4055642	Ghana	Ghana	I	WAF	GJ-trp
986	IRIS_313-11916	105.631	-18.5409	-20.1738	0.941721	0.058279	indica	non-glutinous	4055641	Sri Lanka	Sri Lanka	T	IOC	XI-2
987	IRIS_313-11917	-21.4616	-320.904	-0.679216	0.941737	0.058263	japonica	non-glutinous	4055640	India	India	P	SAC	cA (Aus)
988	IRIS_313-11918	128.837	11.0963	-17.8488	0.942728	0.057272	indica	non-glutinous	4055639	India	India	T	SAC	XI-2
989	IRIS_313-11919	134.579	7.05037	-19.5227	0.943078	0.056922	indica	non-glutinous	4055638	India	India	T	SAC	XI-2
990	IRIS_313-11920	148.376	38.1493	9.60044	0.943326	0.056674	indica	non-glutinous	4055637	Thailand	Thailand	0	SEA	XI-adm
991	IRIS_313-11922	-283.392	50.5328	-54.7586	0.943419	0.056581	japonica	non-glutinous	4055635	Thailand	Thailand	0	SEA	GJ-sbtrp
992	IRIS_313-11923	-266.067	45.3767	-27.5545	0.944473	0.055527	japonica	non-glutinous	4055634	Thailand	Thailand	0	SEA	GJ-sbtrp
993	IRIS_313-11887	130.018	47.2742	-18.6956	0.944536	0.055464	indica	non-glutinous	4055667	Philippines	Philippines	I	SER-IRRI	XI-1B
994	IRIS_313-11924	-288.023	52.8906	-46.1021	0.944905	0.055095	japonica	non-glutinous	4055633	Thailand	Thailand	0	SEA	GJ-sbtrp
995	IRIS_313-11926	-272.296	46.9442	-22.5416	0.945413	0.054587	japonica	glutinous	4055631	Thailand	Thailand	0	SEA	GJ-sbtrp
996	IRIS_313-11927	132.555	61.6504	3.25154	0.945477	0.054523	indica	glutinous	4055630	Thailand	Thailand	0	SEA	XI-3
997	IRIS_313-11928	-276.5	49.1234	121.692	0.946023	0.053977	japonica	non-glutinous	4055629	Philippines	Philippines	T	SER	GJ-trp
998	IRIS_313-11929	-272.541	54.8422	123.417	0.946053	0.053947	japonica	non-glutinous	4055628	Philippines	Philippines	T	SER	GJ-trp
999	IRIS_313-11930	21.8777	18.389	18.1533	0.94621	0.05379	indica	non-glutinous	4055627	Nigeria	Nigeria	P	WAF	XI-1B
1000	IRIS_313-11931	-302.197	56.0884	-191.98	0.946489	0.053511	japonica	non-glutinous	4055626	China	China	0	EAS	GJ-tmp
1001	IRIS_313-11888	-8.19025	-323.44	2.7343	0.946658	0.053342	japonica	non-glutinous	4055666	Pakistan	Pakistan	T	SAW	cA (Aus)
1002	IRIS_313-11934	96.1422	20.8897	-18.6274	0.946822	0.053178	indica	non-glutinous	4054889	Philippines	Philippines	T	SER	XI-adm
1003	IRIS_313-11935	146.486	66.2656	38.4353	0.946999	0.053001	indica	non-glutinous	4055623	Cambodia	Cambodia	T	SEA	XI-3
1004	IRIS_313-11937	132.078	36.0254	-53.477	0.947665	0.052335	indica	non-glutinous	4055622	India	India	0	SAC	XI-adm
1005	IRIS_313-11941	141.316	48.9357	-5.94036	0.94892	0.05108	indica	non-glutinous	4055618	Burkina Faso	Burkina Faso	T	WAF	XI-1B
1006	IRIS_313-11943	133.875	39.9749	-77.0578	0.949074	0.050926	indica	non-glutinous	4055616	Nepal	Nepal	0	SAC	XI-1A
1007	IRIS_313-11889	99.502	-17.2847	-14.4678	0.949253	0.050747	indica	non-glutinous	4055665	Pakistan	Pakistan	T	SAW	XI-adm
1008	IRIS_313-11944	135.931	43.0912	-75.9947	0.949325	0.050675	indica	non-glutinous	4055615	Nepal	Nepal	0	SAC	XI-1A
1009	IRIS_313-11945	122.33	4.11406	-5.10927	0.949569	0.050431	indica	non-glutinous	4055614	Bangladesh	Bangladesh	T	SAE	XI-2
1010	IRIS_313-11946	-287.402	53.574	112.437	0.94961	0.05039	japonica	non-glutinous	4055613	Burkina Faso	Burkina Faso	T	WAF	GJ-trp
1011	IRIS_313-11947	131.143	42.8773	-17.7067	0.949956	0.050044	indica	non-glutinous	4055612	China	China	0	EAS	XI-adm
1012	IRIS_313-11948	123.254	34.3148	-59.3634	0.949993	0.050007	indica	non-glutinous	4055611	China	China	0	EAS	XI-1A
1013	IRIS_313-11949	128.685	31.2251	-74.5215	0.95016	0.04984	indica	non-glutinous	4055610	China	China	0	EAS	XI-1A
1014	IRIS_313-11950	133.34	43.1179	-61.2086	0.950263	0.049737	indica	non-glutinous	4055609	China	China	0	EAS	XI-1A
1015	IRIS_313-11951	125.971	40.1382	-61.409	0.950779	0.049221	indica	non-glutinous	4055608	China	China	0	EAS	XI-1A
1016	IRIS_313-11952	126.893	43.6496	-66.6639	0.951682	0.048318	indica	non-glutinous	4055607	China	China	0	EAS	XI-1A
1017	IRIS_313-11953	115.785	35.673	-55.2839	0.951695	0.048305	indica	non-glutinous	4055606	China	China	0	EAS	XI-1A
1018	IRIS_313-11890	-282.105	54.6634	-200.563	0.95251	0.04749	japonica	non-glutinous	4055664	Taiwan	Taiwan	I	EAR	GJ-tmp
1019	IRIS_313-11954	129.819	43.6161	-45.9599	0.952546	0.047454	indica	non-glutinous	4055605	China	China	0	EAS	XI-1A
1020	IRIS_313-11955	124.269	37.5928	-61.2704	0.952647	0.047353	indica	non-glutinous	4055604	China	China	0	EAS	XI-1A
1021	IRIS_313-11956	-109.583	-6.50525	-39.4538	0.952852	0.047148	japonica	non-glutinous	4055603	Nepal	Nepal	0	SAC	admix
1022	IRIS_313-11957	121.164	25.9452	-9.57355	0.952991	0.047009	indica	non-glutinous	4055602	Thailand	Thailand	T	SEA	XI-adm
1023	IRIS_313-11958	127.917	28.3186	14.5644	0.953365	0.046635	indica	non-glutinous	0	Thailand	Thailand	T	SEA	XI-3
1024	IRIS_313-11959	119.924	53.6651	10.258	0.953369	0.046631	indica	non-glutinous	4494490	Philippines	Philippines	T	SER	XI-3
1025	IRIS_313-11960	118.413	26.5617	-23.2671	0.953659	0.046341	indica	non-glutinous	4055601	Indonesia	Indonesia	I	SER	XI-1B
1026	IRIS_313-11961	134.608	65.6315	8.7899	0.953941	0.046059	indica	glutinous	4055600	Thailand	Thailand	0	SEA	XI-3
1027	IRIS_313-11963	-5.13464	-334.597	3.78909	0.954005	0.045995	japonica	non-glutinous	4055598	India	India	I	SAC	cA (Aus)
1028	IRIS_313-11964	146.54	18.1693	-12.3789	0.954808	0.045192	indica	non-glutinous	4055597	Bangladesh	Bangladesh	T	SAE	XI-2
1029	IRIS_313-11965	131.461	40.1505	-83.0556	0.955038	0.044962	indica	non-glutinous	4055596	China	China	T	EAS	XI-1A
1030	IRIS_313-11966	131.498	45.2846	-55.567	0.955162	0.044838	indica	non-glutinous	4055595	China	China	T	EAS	XI-1A
1031	IRIS_313-11967	114.752	47.8299	-23.7099	0.955292	0.044708	indica	non-glutinous	4055594	China	China	T	EAS	XI-adm
1032	IRIS_313-11968	135.949	52.1189	-81.2795	0.955933	0.044067	indica	non-glutinous	4055593	China	China	T	EAS	XI-1A
1033	IRIS_313-11969	138.104	-12.7516	-22.0283	0.956005	0.043995	indica	non-glutinous	4494491	India	India	0	SAC	XI-2
1034	IRIS_313-11970	-273.616	47.2155	103.44	0.956553	0.043447	japonica	non-glutinous	4055592	Indonesia	Indonesia	T	SER	GJ-trp
1035	IRIS_313-11971	-248.117	36.2118	76.8469	0.957281	0.042719	japonica	glutinous	4055591	Indonesia	Indonesia	T	SER	GJ-trp
1036	IRIS_313-11973	-297.457	50.0974	-161.544	0.957869	0.042131	japonica	non-glutinous	4055590	Korea, Republic of	Korea, Republic of	T	EAR	GJ-tmp
1037	IRIS_313-11974	130.595	58.4526	54.4581	0.958065	0.041935	indica	non-glutinous	4055589	Liberia	Liberia	0	WAF	XI-3
1038	IRIS_313-11892	-273.425	44.9648	-7.17771	0.958091	0.041909	japonica	non-glutinous	4494489	Thailand	Thailand	0	SEA	GJ-sbtrp
1039	IRIS_313-11975	136.805	28.7975	19.3372	0.958102	0.041898	indica	non-glutinous	4055588	Sierra Leone	Sierra Leone	0	WAF	XI-3
1040	IRIS_313-11976	128.719	54.3082	54.8493	0.958663	0.041337	indica	non-glutinous	4055587	Sierra Leone	Sierra Leone	0	WAF	XI-3
1041	IRIS_313-11977	138.454	33.7596	6.39276	0.959012	0.040988	indica	non-glutinous	4055586	Madagascar	Madagascar	T	IOC	XI-adm
1042	IRIS_313-11978	126.358	47.6008	-25.5065	0.959499	0.040501	indica	non-glutinous	4055585	Philippines	Philippines	I	SER-IRRI	XI-1B
1043	IRIS_313-11893	108.805	30.3734	0.567242	0.959589	0.040411	indica	non-glutinous	4055663	Viet Nam	Viet Nam	T	SEA	XI-adm
1044	IRIS_313-11988	141.675	33.7073	16.8306	0.960034	0.039966	indica	non-glutinous	4055575	Sierra Leone	Sierra Leone	T	WAF	XI-adm
1045	IRIS_313-11989	127.212	52.414	38.1125	0.960643	0.039357	indica	non-glutinous	4055574	Brunei Darussalam	Brunei Darussalam	T	SER	XI-3
1046	IRIS_313-11990	123.409	37.2617	-27.554	0.960915	0.039085	indica	glutinous	4055573	Taiwan	Taiwan	I	EAR	XI-1B
1047	IRIS_313-11991	139.812	59.2787	33.7448	0.961461	0.038539	indica	non-glutinous	4055572	Lao People's Democratic Republic	Lao People's Democratic Republic	T	SEA	XI-3
1048	IRIS_313-11992	137.884	56.8201	34.5786	0.961634	0.038366	indica	non-glutinous	4055571	Lao People's Democratic Republic	Lao People's Democratic Republic	T	SEA	XI-3
1049	IRIS_313-11993	131.506	32.8893	0.860282	0.961635	0.038365	indica	non-glutinous	4055570	Myanmar	Myanmar	T	SEA	XI-adm
1050	IRIS_313-11994	-275.365	51.2173	122.857	0.961667	0.038333	japonica	non-glutinous	4055569	Philippines	Philippines	T	SER	GJ-trp
1051	IRIS_313-11995	-273.476	51.5068	116.168	0.961941	0.038059	japonica	non-glutinous	4055568	Philippines	Philippines	T	SER	GJ-trp
1052	IRIS_313-11996	124.056	45.1249	7.17991	0.962075	0.037925	indica	non-glutinous	4055567	Philippines	Philippines	T	SER	XI-3
1053	IRIS_313-11997	150.001	56.6463	11.5915	0.962189	0.037811	indica	non-glutinous	4055566	Cambodia	Cambodia	T	SEA	XI-3
1054	IRIS_313-11979	113.714	31.5392	-3.24192	0.962207	0.037793	indica	non-glutinous	4055584	Philippines	Philippines	I	SER-IRRI	XI-1B
1055	IRIS_313-11998	130.273	55.5298	37.2229	0.96247	0.03753	indica	non-glutinous	4055565	Cambodia	Cambodia	T	SEA	XI-3
1056	IRIS_313-11999	144.055	58.9723	33.3385	0.962572	0.037428	indica	non-glutinous	4055564	Cambodia	Cambodia	T	SEA	XI-3
1057	IRIS_313-12000	139.897	62.5564	30.2068	0.96269	0.03731	indica	non-glutinous	4055563	Cambodia	Cambodia	T	SEA	XI-3
1058	IRIS_313-12002	-31.8244	-310.097	5.22603	0.962781	0.037219	japonica	non-glutinous	4055561	Bangladesh	Bangladesh	T	SAE	cA (Aus)
1059	IRIS_313-12003	-288.37	51.0032	-191.501	0.963392	0.036608	japonica	non-glutinous	4055560	Korea, Republic of	Korea, Republic of	P	EAR	GJ-tmp
1060	IRIS_313-12004	-136.07	-26.8366	63.004	0.963512	0.036488	japonica	non-glutinous	4055559	Madagascar	Madagascar	0	IOC	admix
1061	IRIS_313-12005	132.468	56.5418	48.9756	0.963883	0.036117	indica	non-glutinous	4055558	Malaysia	Malaysia	T	SER	XI-3
1062	IRIS_313-12006	-258.575	43.3523	111.859	0.963964	0.036036	japonica	non-glutinous	4055557	Malaysia	Malaysia	T	SER	GJ-trp
1063	IRIS_313-12007	129.926	52.4831	-15.2269	0.964265	0.035735	indica	non-glutinous	4055556	China	China	0	EAS	XI-adm
1064	IRIS_313-11980	124.942	39.4149	-71.7528	0.964404	0.035596	indica	non-glutinous	4055583	Taiwan	Taiwan	0	EAR	XI-1A
1065	IRIS_313-12009	132.722	48.2067	-63.5031	0.964438	0.035562	indica	non-glutinous	4055554	China	China	0	EAS	XI-1A
1066	IRIS_313-12010	125.726	39.3431	-72.1292	0.965121	0.034879	indica	non-glutinous	4055553	China	China	0	EAS	XI-1A
1067	IRIS_313-12011	110.106	36.1891	-20.9644	0.965203	0.034797	indica	non-glutinous	4055552	China	China	0	EAS	XI-adm
1068	IRIS_313-12012	128.235	37.0499	-56.5866	0.965222	0.034778	indica	non-glutinous	4055551	China	China	0	EAS	XI-1A
1069	IRIS_313-12013	120.428	-20.7277	-10.8927	0.965267	0.034733	indica	non-glutinous	4055550	India	India	0	SAC	XI-2
1070	IRIS_313-12014	141.273	20.0018	-4.34052	0.965402	0.034598	indica	non-glutinous	4055549	Nigeria	Nigeria	T	WAF	XI-2
1071	IRIS_313-12015	134.056	-9.40056	-4.97246	0.965416	0.034584	indica	non-glutinous	4055548	Nigeria	Nigeria	T	WAF	XI-2
1072	IRIS_313-12016	91.01	19.1045	-43.5275	0.965457	0.034543	indica	non-glutinous	4494492	Egypt	Egypt	T	NAF	XI-adm
1073	IRIS_313-12017	134.281	42.3418	-9.1053	0.96597	0.03403	indica	non-glutinous	4055547	Ghana	Ghana	T	WAF	XI-adm
1074	IRIS_313-11981	-303.761	58.1915	-221.837	0.966275	0.033725	japonica	non-glutinous	4055582	Taiwan	Taiwan	I	EAR	GJ-tmp
1075	IRIS_313-12018	-284.978	52.2972	119.153	0.966357	0.033643	japonica	non-glutinous	4055546	Sierra Leone	Sierra Leone	T	WAF	GJ-trp
1076	IRIS_313-12021	-279.585	52.1862	113.668	0.966421	0.033579	japonica	non-glutinous	4055543	Nigeria	Nigeria	I	WAF	GJ-trp
1077	IRIS_313-12024	149.956	55.1338	3.96714	0.966522	0.033478	indica	non-glutinous	4055540	Sierra Leone	Sierra Leone	0	WAF	XI-1B
1078	IRIS_313-12027	110.015	57.0747	21.8946	0.96665	0.03335	indica	non-glutinous	4055537	Indonesia	Indonesia	T	SER	XI-3
1079	IRIS_313-11982	-12.825	-323.892	3.85074	0.967059	0.032941	japonica	non-glutinous	4055581	Bangladesh	Bangladesh	T	SAE	cA (Aus)
1080	IRIS_313-12028	138.772	43.5364	-23.4213	0.967191	0.032809	indica	non-glutinous	4112039	Lao People's Democratic Republic	Lao People's Democratic Republic	T	SEA	XI-adm
1081	IRIS_313-12029	-272.755	43.7637	-14.6188	0.967284	0.032716	japonica	non-glutinous	4055536	Lao People's Democratic Republic	Lao People's Democratic Republic	T	SEA	GJ-sbtrp
1082	IRIS_313-12030	-140.596	34.2251	89.1551	0.967454	0.032546	japonica	non-glutinous	4055535	Malaysia	Malaysia	0	SER	admix
1083	IRIS_313-12031	-281.564	49.0701	93.3359	0.967686	0.032314	japonica	non-glutinous	4055534	Philippines	Philippines	0	SER	GJ-trp
1084	IRIS_313-12033	122.439	23.4161	-47.9691	0.967834	0.032166	indica	non-glutinous	4055532	China	China	0	EAS	XI-1A
1085	IRIS_313-12036	143.437	58.3776	33.3225	0.968092	0.031908	indica	non-glutinous	4055530	Cambodia	Cambodia	T	SEA	XI-3
1086	IRIS_313-12037	146.114	55.2171	27.4149	0.968173	0.031827	indica	non-glutinous	4055529	Cambodia	Cambodia	T	SEA	XI-3
1087	IRIS_313-12038	135.095	57.8007	28.6529	0.96833	0.03167	indica	non-glutinous	4055528	Cambodia	Cambodia	T	SEA	XI-3
1088	IRIS_313-11983	147.982	26.0163	2.35314	0.968364	0.031636	indica	non-glutinous	4055580	Burkina Faso	Burkina Faso	T	WAF	XI-2
1089	IRIS_313-12039	132.061	54.506	38.3838	0.96885	0.03115	indica	non-glutinous	4055527	Cambodia	Cambodia	T	SEA	XI-3
1090	IRIS_313-12040	142.971	62.6513	33.7728	0.968919	0.031081	indica	non-glutinous	4055526	Cambodia	Cambodia	T	SEA	XI-3
1091	IRIS_313-12041	142.112	64.9463	22.2725	0.969028	0.030972	indica	non-glutinous	4055525	Cambodia	Cambodia	T	SEA	XI-3
1092	IRIS_313-12042	130.576	50.967	21.5522	0.969085	0.030915	indica	non-glutinous	4055524	Cambodia	Cambodia	T	SEA	XI-3
1093	IRIS_313-12043	140.531	52.6832	16.2475	0.969176	0.030824	indica	non-glutinous	4055523	Cambodia	Cambodia	T	SEA	XI-3
1094	IRIS_313-12044	138.826	58.8659	25.9213	0.969481	0.030519	indica	non-glutinous	4111993	Cambodia	Cambodia	T	SEA	XI-3
1095	IRIS_313-12045	-274.773	51.7381	99.1248	0.969512	0.030488	japonica	non-glutinous	0	Indonesia	Indonesia	T	SER	GJ-trp
1096	IRIS_313-12046	130.571	54.6939	46.4681	0.969571	0.030429	indica	non-glutinous	4055522	Indonesia	Indonesia	T	SER	XI-3
1097	IRIS_313-12047	133.661	65.2371	45.128	0.969733	0.030267	indica	non-glutinous	4055521	Indonesia	Indonesia	T	SER	XI-3
1098	IRIS_313-12048	134.734	61.0231	47.3962	0.969896	0.030104	indica	non-glutinous	4055520	Indonesia	Indonesia	T	SER	XI-3
1099	IRIS_313-11984	-275.86	46.1157	-155.114	0.970138	0.029862	japonica	non-glutinous	4055579	Viet Nam	Viet Nam	T	SEA	GJ-tmp
1100	IRIS_313-12049	137.616	54.943	2.28003	0.970288	0.029712	indica	glutinous	4112037	Lao People's Democratic Republic	Lao People's Democratic Republic	T	SEA	XI-3
1101	IRIS_313-12050	129.556	43.9715	-23.9874	0.970355	0.029645	indica	glutinous	4055519	Myanmar	Myanmar	T	SEA	XI-adm
1102	IRIS_313-12051	-269.817	52.2472	116.766	0.970394	0.029606	japonica	non-glutinous	4055518	Philippines	Philippines	T	SER	GJ-trp
1103	IRIS_313-12052	84.5153	-47.1931	-13.3804	0.970412	0.029588	indica	non-glutinous	4055517	India	India	T	SAC	XI-adm
1104	IRIS_313-12053	125.977	46.5271	21.0903	0.97063	0.02937	indica	non-glutinous	4055516	Burundi	Burundi	I	EAF	XI-adm
1105	IRIS_313-12055	2.08909	-264.585	0.736474	0.97073	0.02927	indica	non-glutinous	4055514	Bangladesh	Bangladesh	P	SAE	cA (Aus)
1106	IRIS_313-12057	109.713	36.8067	-31.4608	0.970774	0.029226	indica	non-glutinous	4055512	China	China	0	EAS	XI-adm
1107	IRIS_313-12058	141.056	53.7491	33.9271	0.970972	0.029028	indica	non-glutinous	4055511	Cambodia	Cambodia	T	SEA	XI-3
1108	IRIS_313-11985	131.301	44.5047	-3.06915	0.971311	0.028689	indica	non-glutinous	4055578	China	China	0	EAS	XI-adm
1109	IRIS_313-12059	-289.399	47.4942	-128.956	0.971363	0.028637	japonica	non-glutinous	4055510	China	China	0	EAS	GJ-tmp
1110	IRIS_313-12060	-285.488	43.1691	-102.906	0.971519	0.028481	japonica	non-glutinous	4055509	China	China	0	EAS	GJ-adm
1111	IRIS_313-12061	-288.015	49.6063	-151.586	0.971657	0.028343	japonica	non-glutinous	4055508	China	China	0	EAS	GJ-tmp
1112	IRIS_313-12063	-275.231	45.4088	-28.1993	0.97168	0.02832	japonica	glutinous	4055507	Lao People's Democratic Republic	Lao People's Democratic Republic	0	SEA	GJ-sbtrp
1113	IRIS_313-12065	52.0707	-162.539	-5.74836	0.971796	0.028204	indica	non-glutinous	4055506	Nigeria	Nigeria	0	WAF	admix
1114	IRIS_313-12066	145.551	55.8322	26.2804	0.971827	0.028173	indica	non-glutinous	4055505	Philippines	Philippines	T	SER	XI-3
1115	IRIS_313-12067	121.885	34.1973	-6.68194	0.971864	0.028136	indica	non-glutinous	4055504	Philippines	Philippines	T	SER	XI-adm
1116	IRIS_313-12068	-261.91	48.4962	100.086	0.971912	0.028088	japonica	glutinous	4054887	Indonesia	Indonesia	T	SER	GJ-trp
1117	IRIS_313-11986	127.825	45.233	-80.0919	0.97194	0.02806	indica	non-glutinous	4055577	China	China	0	EAS	XI-1A
1118	IRIS_313-12069	-268.705	49.2263	99.3893	0.971967	0.028033	japonica	glutinous	4055503	Indonesia	Indonesia	T	SER	GJ-trp
1119	IRIS_313-12070	-263.283	44.8102	110.18	0.972006	0.027994	japonica	non-glutinous	4055502	Malaysia	Malaysia	T	SER	GJ-trp
1120	IRIS_313-12071	-284.682	50.309	-31.6089	0.972073	0.027927	japonica	glutinous	4055501	Lao People's Democratic Republic	Lao People's Democratic Republic	0	SEA	GJ-sbtrp
1121	IRIS_313-12072	122.342	41.5024	-27.4164	0.972237	0.027763	indica	non-glutinous	4494493	Myanmar	Myanmar	0	SEA	XI-adm
1122	IRIS_313-11987	125.177	59.7835	15.2482	0.972249	0.027751	indica	non-glutinous	4055576	Philippines	Philippines	I	SER-IRRI	XI-adm
1123	IRIS_313-12082	97.2842	-41.814	-14.5075	0.9724	0.0276	indica	non-glutinous	4055491	Madagascar	Madagascar	T	IOC	XI-2
1124	IRIS_313-12083	109.15	-47.9579	-14.3225	0.972517	0.027483	indica	non-glutinous	4055490	Madagascar	Madagascar	T	IOC	XI-2
1125	IRIS_313-12073	-271.194	48.7173	127.266	0.972525	0.027475	japonica	non-glutinous	4055500	Philippines	Philippines	T	SER	GJ-trp
1126	IRIS_313-12093	145.907	57.96	-8.17452	0.972794	0.027206	indica	non-glutinous	4055481	Nepal	Nepal	0	SAC	XI-adm
1127	IRIS_313-12094	-172.651	-62.0893	3.20399	0.972941	0.027059	japonica	non-glutinous	4055480	Bangladesh	Bangladesh	T	SAE	cB (Bas)
1128	IRIS_313-12096	123.81	17.7892	7.59252	0.973071	0.026929	indica	non-glutinous	4055478	Cambodia	Cambodia	T	SEA	XI-3
1129	IRIS_313-12097	148.861	59.2931	31.3912	0.97312	0.02688	indica	non-glutinous	4494494	Cambodia	Cambodia	T	SEA	XI-3
1130	IRIS_313-12101	152.185	58.4074	25.1765	0.973163	0.026837	indica	non-glutinous	4055475	Cambodia	Cambodia	T	SEA	XI-3
1131	IRIS_313-12074	-192.62	-19.7476	-2.13064	0.973434	0.026566	japonica	non-glutinous	4055499	Myanmar	Myanmar	T	SEA	cB (Bas)
1132	IRIS_313-12102	134.551	46.1165	27.1859	0.973522	0.026478	indica	non-glutinous	4055474	Cambodia	Cambodia	T	SEA	XI-3
1133	IRIS_313-12108	-268.824	45.8638	103.295	0.973848	0.026152	japonica	non-glutinous	4055468	Malaysia	Malaysia	0	SER	GJ-trp
1134	IRIS_313-12109	143.117	58.9351	16.5669	0.973928	0.026072	indica	non-glutinous	4054884	Cambodia	Cambodia	T	SEA	XI-3
1135	IRIS_313-12118	111.611	-36.3841	-16.5736	0.974006	0.025994	indica	non-glutinous	4055459	Madagascar	Madagascar	0	IOC	XI-2
1136	IRIS_313-12121	152.612	65.0262	29.6862	0.974038	0.025962	indica	non-glutinous	4055457	Lao People's Democratic Republic	Lao People's Democratic Republic	T	SEA	XI-3
1137	IRIS_313-12076	-286.31	46.1452	-28.6117	0.97435	0.02565	japonica	non-glutinous	4055497	Lao People's Democratic Republic	Lao People's Democratic Republic	0	SEA	GJ-sbtrp
1138	IRIS_313-12127	143.183	61.0121	8.37297	0.97482	0.02518	indica	glutinous	4055453	Lao People's Democratic Republic	Lao People's Democratic Republic	T	SEA	XI-3
1139	IRIS_313-12128	139.938	69.8324	32.0707	0.975355	0.024645	indica	non-glutinous	4055452	Lao People's Democratic Republic	Lao People's Democratic Republic	T	SEA	XI-3
1140	IRIS_313-12129	-223.358	24.7994	-6.29363	0.975487	0.024513	japonica	non-glutinous	4055451	Lao People's Democratic Republic	Lao People's Democratic Republic	T	SEA	GJ-sbtrp
1141	IRIS_313-12130	143.861	56.5187	3.65948	0.975661	0.024339	indica	non-glutinous	4055450	Lao People's Democratic Republic	Lao People's Democratic Republic	0	SEA	XI-3
1142	IRIS_313-12131	149.101	63.0065	12.5603	0.975695	0.024305	indica	non-glutinous	4055449	Lao People's Democratic Republic	Lao People's Democratic Republic	0	SEA	XI-3
1143	IRIS_313-12077	-282.286	44.1678	-27.5153	0.975808	0.024192	japonica	glutinous	4055496	Lao People's Democratic Republic	Lao People's Democratic Republic	0	SEA	GJ-sbtrp
1144	IRIS_313-12133	137.162	61.7086	4.88115	0.975906	0.024094	indica	non-glutinous	4055447	Lao People's Democratic Republic	Lao People's Democratic Republic	T	SEA	XI-3
1145	IRIS_313-12134	-272.362	47.0318	-0.953063	0.975928	0.024072	japonica	non-glutinous	4494495	Lao People's Democratic Republic	Lao People's Democratic Republic	T	SEA	GJ-sbtrp
1146	IRIS_313-12135	121.812	37.334	-20.7643	0.975973	0.024027	indica	non-glutinous	4055446	Malaysia	Malaysia	0	SER	XI-1B
1147	IRIS_313-12138	148.837	56.3073	-7.32213	0.976012	0.023988	indica	non-glutinous	4055443	Bhutan	Bhutan	T	SAE	XI-adm
1148	IRIS_313-12139	-15.4273	-330.142	9.02814	0.976023	0.023977	japonica	non-glutinous	4055442	Nepal	Nepal	0	SAC	cA (Aus)
1149	IRIS_313-12141	-10.015	-332.476	2.81667	0.976083	0.023917	japonica	non-glutinous	4055441	Bangladesh	Bangladesh	T	SAE	cA (Aus)
1150	IRIS_313-12078	132.403	45.5358	-13.8627	0.976097	0.023903	indica	non-glutinous	4055495	Viet Nam	Viet Nam	0	SEA	XI-adm
1151	IRIS_313-12142	138.507	55.6248	28.9992	0.976119	0.023881	indica	non-glutinous	4055440	Cambodia	Cambodia	T	SEA	XI-3
1152	IRIS_313-12143	150.976	47.1695	37.951	0.976198	0.023802	indica	non-glutinous	4055439	Cambodia	Cambodia	T	SEA	XI-3
1153	IRIS_313-12144	-268.849	49.539	116.852	0.976217	0.023783	japonica	non-glutinous	4055438	Philippines	Philippines	0	SER	GJ-trp
1154	IRIS_313-12146	121.824	32.2851	3.41582	0.976262	0.023738	indica	non-glutinous	4055436	Cambodia	Cambodia	T	SEA	XI-adm
1155	IRIS_313-12147	142.604	47.6308	19.5625	0.976286	0.023714	indica	non-glutinous	4055435	Cambodia	Cambodia	T	SEA	XI-3
1156	IRIS_313-12148	135.041	47.7001	28.3404	0.976328	0.023672	indica	non-glutinous	4055434	Cambodia	Cambodia	T	SEA	XI-3
1157	IRIS_313-12151	138.542	55.9753	25.2133	0.976339	0.023661	indica	non-glutinous	4055431	Cambodia	Cambodia	T	SEA	XI-3
1158	IRIS_313-12079	130.822	59.6919	54.4578	0.976481	0.023519	indica	non-glutinous	4055494	Pakistan	Pakistan	I	SAW	XI-3
1159	IRIS_313-12152	136.531	59.9965	28.6071	0.976642	0.023358	indica	non-glutinous	4055430	Cambodia	Cambodia	T	SEA	XI-3
1160	IRIS_313-12161	148.291	58.0652	24.6698	0.976655	0.023345	indica	non-glutinous	4055422	Cambodia	Cambodia	T	SEA	XI-3
1161	IRIS_313-12080	128.758	59.6307	54.6432	0.976969	0.023031	indica	non-glutinous	4055493	Philippines	Philippines	0	SER	XI-3
1162	IRIS_313-12164	-263.841	43.1951	73.5732	0.977193	0.022807	japonica	non-glutinous	4055419	Cambodia	Cambodia	T	SEA	GJ-adm
1163	IRIS_313-12081	144.303	50.072	39.0878	0.977223	0.022777	indica	non-glutinous	4055492	Philippines	Philippines	0	SER	XI-3
1164	IRIS_313-12180	149.413	56.5107	-7.79691	0.977227	0.022773	indica	non-glutinous	4055406	Nepal	Nepal	T	SAC	XI-adm
1165	IRIS_313-12182	141.327	45.5193	-7.5975	0.97736	0.02264	indica	non-glutinous	4055404	Nepal	Nepal	T	SAC	XI-adm
1166	IRIS_313-12183	-21.3387	-261.679	-6.89726	0.977384	0.022616	japonica	non-glutinous	4055403	Nepal	Nepal	T	SAC	cA (Aus)
1167	IRIS_313-12186	83.5679	14.7537	-40.7173	0.977408	0.022592	indica	non-glutinous	4055401	Lao People's Democratic Republic	Lao People's Democratic Republic	0	SEA	XI-adm
1168	IRIS_313-12187	135.255	44.4518	-9.67884	0.977462	0.022538	indica	non-glutinous	4055400	Lao People's Democratic Republic	Lao People's Democratic Republic	0	SEA	XI-adm
1169	IRIS_313-12188	140.176	61.5465	32.5576	0.977489	0.022511	indica	non-glutinous	4055399	Lao People's Democratic Republic	Lao People's Democratic Republic	0	SEA	XI-3
1170	IRIS_313-12190	133.841	40.4349	-30.0368	0.977493	0.022507	indica	non-glutinous	4055397	Lao People's Democratic Republic	Lao People's Democratic Republic	T	SEA	XI-adm
1171	IRIS_313-12193	140.923	51.2016	20.8435	0.977509	0.022491	indica	non-glutinous	4055395	Lao People's Democratic Republic	Lao People's Democratic Republic	T	SEA	XI-3
1172	IRIS_313-12194	133.456	51.8395	15.5815	0.977574	0.022426	indica	non-glutinous	4055394	Lao People's Democratic Republic	Lao People's Democratic Republic	T	SEA	XI-3
1173	IRIS_313-12200	-262.882	43.84	-39.5861	0.977767	0.022233	japonica	non-glutinous	4055388	Lao People's Democratic Republic	Lao People's Democratic Republic	0	SEA	GJ-sbtrp
1174	IRIS_313-12207	130.332	31.1802	-31.3752	0.977901	0.022099	indica	non-glutinous	4055381	Lao People's Democratic Republic	Lao People's Democratic Republic	T	SEA	XI-adm
1175	IRIS_313-12210	130.109	37.4334	-13.7075	0.977918	0.022082	indica	non-glutinous	4055378	Viet Nam	Viet Nam	T	SEA	XI-adm
1176	IRIS_313-12217	-295.929	50.7354	-188.367	0.97793	0.02207	japonica	non-glutinous	4055372	Korea, Republic of	Korea, Republic of	P	EAR	GJ-tmp
1177	IRIS_313-12220	156.83	62.4209	-1.50445	0.978135	0.021865	indica	non-glutinous	4055369	Lao People's Democratic Republic	Lao People's Democratic Republic	T	SEA	XI-adm
1178	IRIS_313-12221	144.358	56.4129	7.39332	0.978344	0.021656	indica	non-glutinous	4055368	Lao People's Democratic Republic	Lao People's Democratic Republic	0	SEA	XI-3
1179	IRIS_313-12222	128.235	35.7061	2.31241	0.978371	0.021629	indica	non-glutinous	4055367	Lao People's Democratic Republic	Lao People's Democratic Republic	T	SEA	XI-3
1180	IRIS_313-12224	144.427	55.7636	21.2807	0.978537	0.021463	indica	non-glutinous	4055365	Lao People's Democratic Republic	Lao People's Democratic Republic	T	SEA	XI-3
1181	IRIS_313-12225	139.428	60.6358	21.211	0.978563	0.021437	indica	non-glutinous	4055364	Lao People's Democratic Republic	Lao People's Democratic Republic	T	SEA	XI-3
1182	IRIS_313-12226	-281.606	46.1056	-15.4723	0.978579	0.021421	japonica	glutinous	4055363	Lao People's Democratic Republic	Lao People's Democratic Republic	T	SEA	GJ-sbtrp
1183	IRIS_313-12227	-273.395	47.7368	-14.7622	0.9786	0.0214	japonica	non-glutinous	4055362	Lao People's Democratic Republic	Lao People's Democratic Republic	T	SEA	GJ-sbtrp
1184	IRIS_313-12228	-286.432	50.7802	-22.8719	0.978727	0.021273	japonica	non-glutinous	4055361	Lao People's Democratic Republic	Lao People's Democratic Republic	T	SEA	GJ-sbtrp
1185	IRIS_313-12229	145.339	56.1306	9.74211	0.978738	0.021262	indica	non-glutinous	4055360	Lao People's Democratic Republic	Lao People's Democratic Republic	T	SEA	XI-3
1186	IRIS_313-12231	138.097	56.5156	9.75408	0.97874	0.02126	indica	non-glutinous	4054879	Lao People's Democratic Republic	Lao People's Democratic Republic	T	SEA	XI-3
1187	IRIS_313-12232	120.771	44.5903	-48.1059	0.978992	0.021008	indica	non-glutinous	4055358	China	China	0	EAS	XI-adm
1188	IRIS_313-12234	145.429	60.7102	-52.6015	0.978992	0.021008	indica	non-glutinous	4055356	China	China	0	EAS	XI-1B
1189	IRIS_313-12236	132.536	36.522	-63.7641	0.979057	0.020943	indica	non-glutinous	4055354	China	China	0	EAS	XI-1A
1190	IRIS_313-12237	118.032	42.7995	-69.6244	0.979159	0.020841	indica	non-glutinous	4055353	China	China	0	EAS	XI-1A
1191	IRIS_313-12240	130.04	58.2185	48.1948	0.979178	0.020822	indica	non-glutinous	4055350	Indonesia	Indonesia	0	SER	XI-3
1192	IRIS_313-12241	-261.285	45.3138	100.289	0.979182	0.020818	japonica	non-glutinous	4055349	Indonesia	Indonesia	0	SER	GJ-trp
1193	IRIS_313-12242	-286.619	46.639	-30.5822	0.979311	0.020689	japonica	non-glutinous	4055348	Lao People's Democratic Republic	Lao People's Democratic Republic	T	SEA	GJ-sbtrp
1194	IRIS_313-12244	-274.986	47.1817	121.792	0.979477	0.020523	japonica	non-glutinous	4055346	Philippines	Philippines	0	SER	GJ-trp
1195	IRIS_313-12246	138.101	60.1301	7.1678	0.979481	0.020519	indica	non-glutinous	4055344	Cambodia	Cambodia	0	SEA	XI-3
1196	IRIS_313-12247	132.114	48.1477	19.3515	0.979524	0.020476	indica	non-glutinous	4054878	Cambodia	Cambodia	0	SEA	XI-3
1197	IRIS_313-12249	130.505	34.1143	5.02694	0.979598	0.020402	indica	non-glutinous	4055342	Cambodia	Cambodia	0	SEA	XI-3
1198	IRIS_313-12251	152.21	54.6626	36.3216	0.979666	0.020334	indica	non-glutinous	4055340	Cambodia	Cambodia	0	SEA	XI-3
1199	IRIS_313-12252	-259.326	42.307	0.126616	0.979853	0.020147	japonica	non-glutinous	4055339	Lao People's Democratic Republic	Lao People's Democratic Republic	0	SEA	GJ-sbtrp
1200	IRIS_313-12254	-277.159	47.546	-22.414	0.979941	0.020059	japonica	non-glutinous	4055337	Lao People's Democratic Republic	Lao People's Democratic Republic	0	SEA	GJ-sbtrp
1201	IRIS_313-12257	-271.011	46.5989	-31.2531	0.980273	0.019727	japonica	non-glutinous	4055334	Lao People's Democratic Republic	Lao People's Democratic Republic	0	SEA	GJ-sbtrp
1202	IRIS_313-12258	-282.563	50.1877	-33.3357	0.980322	0.019678	japonica	non-glutinous	4055333	Lao People's Democratic Republic	Lao People's Democratic Republic	T	SEA	GJ-sbtrp
1203	IRIS_313-12268	139.601	60.6154	-10.8123	0.980502	0.019498	indica	non-glutinous	4055325	Myanmar	Myanmar	T	SEA	XI-adm
1204	IRIS_313-12269	144.367	37.5749	21.6872	0.980615	0.019385	indica	non-glutinous	4055324	Myanmar	Myanmar	T	SEA	XI-adm
1205	IRIS_313-12270	141.592	44.9533	-9.43324	0.980627	0.019373	indica	non-glutinous	4055323	Myanmar	Myanmar	T	SEA	XI-adm
1206	IRIS_313-12271	-282.822	50.1463	105.285	0.980642	0.019358	japonica	non-glutinous	4055322	Philippines	Philippines	0	SER	GJ-trp
1207	IRIS_313-12272	-280.432	45.9883	98.6079	0.980643	0.019357	japonica	glutinous	4055321	Philippines	Philippines	0	SER	GJ-trp
1208	IRIS_313-12273	128.641	37.2752	-59.227	0.980744	0.019256	indica	non-glutinous	4055320	China	China	0	EAS	XI-1A
1209	IRIS_313-12275	126.6	38.5355	-12.4223	0.980786	0.019214	indica	non-glutinous	4055318	China	China	0	EAS	XI-adm
1210	IRIS_313-12259	147.049	59.7253	20.758	0.980806	0.019194	indica	non-glutinous	4055332	Lao People's Democratic Republic	Lao People's Democratic Republic	0	SEA	XI-3
1211	IRIS_313-12278	111.472	-38.974	-14.5679	0.980921	0.019079	indica	non-glutinous	4494497	Madagascar	Madagascar	0	IOC	XI-2
1212	IRIS_313-12279	-276.028	54.7429	115.471	0.980921	0.019079	japonica	non-glutinous	4055315	Madagascar	Madagascar	0	IOC	GJ-trp
1213	IRIS_313-12280	139.16	35.0985	14.2671	0.981009	0.018991	indica	non-glutinous	4055314	Madagascar	Madagascar	0	IOC	XI-adm
1214	IRIS_313-12281	-285.576	62.4931	117.257	0.981331	0.018669	japonica	non-glutinous	4055313	Madagascar	Madagascar	0	IOC	GJ-trp
1215	IRIS_313-12283	129.3	10.2076	12.5077	0.981642	0.018358	indica	non-glutinous	4055311	Madagascar	Madagascar	0	IOC	XI-adm
1216	IRIS_313-12284	93.1538	-97.4044	-15.1244	0.98169	0.01831	indica	non-glutinous	4054875	Madagascar	Madagascar	0	IOC	XI-2
1217	IRIS_313-12285	-257.645	42.3294	109.598	0.981703	0.018297	japonica	non-glutinous	4055310	Malaysia	Malaysia	0	SER	GJ-trp
1218	IRIS_313-12286	146.212	49.9483	16.3573	0.981703	0.018297	indica	non-glutinous	4054874	Myanmar	Myanmar	T	SEA	XI-3
1219	IRIS_313-12287	137.323	72.6852	34.1646	0.98179	0.01821	indica	non-glutinous	4055309	Myanmar	Myanmar	T	SEA	XI-3
1220	IRIS_313-12260	132.042	57.6225	5.57602	0.981956	0.018044	indica	glutinous	4054877	Lao People's Democratic Republic	Lao People's Democratic Republic	T	SEA	XI-3
1221	IRIS_313-12288	147.048	51.5647	13.4039	0.981989	0.018011	indica	non-glutinous	4055308	Myanmar	Myanmar	T	SEA	XI-3
1222	IRIS_313-12289	-274.922	44.8804	-15.7252	0.982214	0.017786	japonica	non-glutinous	4055307	Myanmar	Myanmar	T	SEA	GJ-sbtrp
1223	IRIS_313-12290	137.458	54.4175	3.99807	0.982259	0.017741	indica	glutinous	4055306	Myanmar	Myanmar	T	SEA	XI-adm
1224	IRIS_313-12291	146.361	48.9481	-2.42991	0.982282	0.017718	indica	non-glutinous	4112032	Myanmar	Myanmar	T	SEA	XI-adm
1225	IRIS_313-12292	137.91	48.7894	17.2921	0.982334	0.017666	indica	non-glutinous	4055305	Myanmar	Myanmar	T	SEA	XI-3
1226	IRIS_313-12297	114.636	36.6007	-24.8431	0.982532	0.017468	indica	non-glutinous	4055300	Lao People's Democratic Republic	Lao People's Democratic Republic	0	SEA	XI-adm
1227	IRIS_313-12261	155.398	69.7395	15.8121	0.982608	0.017392	indica	non-glutinous	4055331	Lao People's Democratic Republic	Lao People's Democratic Republic	T	SEA	XI-3
1228	IRIS_313-12299	-251.649	43.1365	2.05183	0.98264	0.01736	japonica	non-glutinous	4055298	Lao People's Democratic Republic	Lao People's Democratic Republic	T	SEA	GJ-sbtrp
1229	IRIS_313-12300	139.553	41.3224	-27.9911	0.98272	0.01728	indica	non-glutinous	4055297	Lao People's Democratic Republic	Lao People's Democratic Republic	T	SEA	XI-adm
1230	IRIS_313-12301	132.029	39.8476	-7.47229	0.982801	0.017199	indica	non-glutinous	4055296	Lao People's Democratic Republic	Lao People's Democratic Republic	T	SEA	XI-adm
1231	IRIS_313-12302	137.35	50.5767	6.36903	0.982944	0.017056	indica	non-glutinous	4055295	Lao People's Democratic Republic	Lao People's Democratic Republic	0	SEA	XI-3
1232	IRIS_313-12303	138.841	48.5999	1.39285	0.983086	0.016914	indica	non-glutinous	4055294	Lao People's Democratic Republic	Lao People's Democratic Republic	T	SEA	XI-adm
1233	IRIS_313-12305	139.264	53.8513	15.0155	0.983126	0.016874	indica	non-glutinous	4055292	Lao People's Democratic Republic	Lao People's Democratic Republic	T	SEA	XI-3
1234	IRIS_313-12307	-286.577	51.2018	-43.2948	0.983167	0.016833	japonica	non-glutinous	4055290	Lao People's Democratic Republic	Lao People's Democratic Republic	0	SEA	GJ-sbtrp
1235	IRIS_313-12262	-282.27	49.2972	-37.5636	0.983177	0.016823	japonica	non-glutinous	4055330	Lao People's Democratic Republic	Lao People's Democratic Republic	0	SEA	GJ-sbtrp
1236	IRIS_313-12308	140.483	60.7515	26.9391	0.983221	0.016779	indica	non-glutinous	4055289	Lao People's Democratic Republic	Lao People's Democratic Republic	T	SEA	XI-3
1237	IRIS_313-12309	139.028	57.0155	8.6266	0.983257	0.016743	indica	non-glutinous	4055288	Lao People's Democratic Republic	Lao People's Democratic Republic	T	SEA	XI-3
1238	IRIS_313-12311	-266.724	43.3007	-35.3108	0.983305	0.016695	japonica	non-glutinous	4055286	Lao People's Democratic Republic	Lao People's Democratic Republic	T	SEA	GJ-sbtrp
1239	IRIS_313-12312	-274.302	43.0022	-25.8538	0.983309	0.016691	japonica	non-glutinous	4055285	Lao People's Democratic Republic	Lao People's Democratic Republic	0	SEA	GJ-sbtrp
1240	IRIS_313-12313	-269.51	42.5793	-19.0921	0.983311	0.016689	japonica	non-glutinous	4494498	Lao People's Democratic Republic	Lao People's Democratic Republic	0	SEA	GJ-sbtrp
1241	IRIS_313-12319	122.552	49.6132	-4.58986	0.983336	0.016664	indica	non-glutinous	4055281	Philippines	Philippines	I	SER-IRRI	XI-1B
1242	IRIS_313-12263	146.223	64.6456	14.2753	0.983505	0.016495	indica	non-glutinous	4055329	Lao People's Democratic Republic	Lao People's Democratic Republic	T	SEA	XI-3
1243	IRIS_313-12321	-273.681	44.1927	-7.73382	0.983544	0.016456	japonica	non-glutinous	4055279	Lao People's Democratic Republic	Lao People's Democratic Republic	T	SEA	GJ-sbtrp
1244	IRIS_313-12322	-279.845	47.2083	-9.73639	0.983597	0.016403	japonica	non-glutinous	4055278	Lao People's Democratic Republic	Lao People's Democratic Republic	T	SEA	GJ-sbtrp
1245	IRIS_313-12323	-286.687	48.2402	-33.1925	0.983805	0.016195	japonica	glutinous	4055277	Lao People's Democratic Republic	Lao People's Democratic Republic	T	SEA	GJ-sbtrp
1246	IRIS_313-12324	-275.87	45.0658	-32.293	0.983833	0.016167	japonica	non-glutinous	4055276	Lao People's Democratic Republic	Lao People's Democratic Republic	0	SEA	GJ-sbtrp
1247	IRIS_313-12325	140.579	11.5629	-5.78696	0.983844	0.016156	indica	non-glutinous	4055275	Cameroon	Cameroon	P	WAF	XI-2
1248	IRIS_313-12329	119.082	27.0046	-23.7125	0.983874	0.016126	indica	non-glutinous	4055271	Lao People's Democratic Republic	Lao People's Democratic Republic	T	SEA	XI-adm
1249	IRIS_313-12330	-266.706	41.6093	-24.9441	0.983953	0.016047	japonica	non-glutinous	4055270	Lao People's Democratic Republic	Lao People's Democratic Republic	T	SEA	GJ-sbtrp
1250	IRIS_313-12332	-272.244	43.0003	-20.1692	0.983997	0.016003	japonica	glutinous	4055268	Lao People's Democratic Republic	Lao People's Democratic Republic	0	SEA	GJ-sbtrp
1251	IRIS_313-12334	142.106	56.7698	14.0402	0.984026	0.015974	indica	non-glutinous	4055266	Lao People's Democratic Republic	Lao People's Democratic Republic	T	SEA	XI-3
1252	IRIS_313-12336	-279.683	45.0919	-23.4979	0.984087	0.015913	japonica	non-glutinous	4055264	Lao People's Democratic Republic	Lao People's Democratic Republic	T	SEA	GJ-sbtrp
1253	IRIS_313-12337	-274.961	48.1793	-32.3229	0.984107	0.015893	japonica	glutinous	4055263	Lao People's Democratic Republic	Lao People's Democratic Republic	T	SEA	GJ-sbtrp
1254	IRIS_313-12340	-279.137	46.5995	-41.6779	0.984223	0.015777	japonica	non-glutinous	4055260	Lao People's Democratic Republic	Lao People's Democratic Republic	T	SEA	GJ-sbtrp
1255	IRIS_313-12265	-270.425	41.3076	-12.5805	0.984232	0.015768	japonica	non-glutinous	4055327	Lao People's Democratic Republic	Lao People's Democratic Republic	0	SEA	GJ-sbtrp
1256	IRIS_313-12341	-278.275	46.6739	-38.0922	0.984543	0.015457	japonica	non-glutinous	4055259	Lao People's Democratic Republic	Lao People's Democratic Republic	0	SEA	GJ-sbtrp
1257	IRIS_313-12342	-276.502	45.4119	-28.1318	0.984552	0.015448	japonica	non-glutinous	4055258	Lao People's Democratic Republic	Lao People's Democratic Republic	T	SEA	GJ-sbtrp
1258	IRIS_313-12344	-269.99	44.7601	-31.6208	0.984571	0.015429	japonica	non-glutinous	4055256	Lao People's Democratic Republic	Lao People's Democratic Republic	T	SEA	GJ-sbtrp
1259	IRIS_313-12345	-238.337	36.8544	2.91638	0.984649	0.015351	japonica	non-glutinous	4054873	Lao People's Democratic Republic	Lao People's Democratic Republic	T	SEA	GJ-sbtrp
1260	IRIS_313-12346	-273.406	49.6586	-33.5582	0.984969	0.015031	japonica	non-glutinous	4055255	Lao People's Democratic Republic	Lao People's Democratic Republic	T	SEA	GJ-sbtrp
1261	IRIS_313-12347	-272.051	43.7958	-27.038	0.985037	0.014963	japonica	non-glutinous	4055254	Lao People's Democratic Republic	Lao People's Democratic Republic	T	SEA	GJ-sbtrp
1262	IRIS_313-12348	-279.283	49.0847	-27.1131	0.985067	0.014933	japonica	glutinous	4055253	Lao People's Democratic Republic	Lao People's Democratic Republic	T	SEA	GJ-sbtrp
1263	IRIS_313-12349	-263.301	40.0195	-23.3712	0.985096	0.014904	japonica	non-glutinous	4055252	Lao People's Democratic Republic	Lao People's Democratic Republic	0	SEA	GJ-sbtrp
1264	IRIS_313-12350	-282.034	49.1201	-28.0552	0.985227	0.014773	japonica	non-glutinous	4055251	Lao People's Democratic Republic	Lao People's Democratic Republic	T	SEA	GJ-sbtrp
1265	IRIS_313-12266	-273.669	42.7328	-18.8003	0.985232	0.014768	japonica	non-glutinous	4054876	Myanmar	Myanmar	T	SEA	GJ-sbtrp
1266	IRIS_313-12351	-279.834	46.8696	-38.8774	0.985236	0.014764	japonica	non-glutinous	4494500	Lao People's Democratic Republic	Lao People's Democratic Republic	T	SEA	GJ-sbtrp
1267	IRIS_313-12352	-276.752	47.2813	-27.27	0.985291	0.014709	japonica	non-glutinous	4055250	Lao People's Democratic Republic	Lao People's Democratic Republic	T	SEA	GJ-sbtrp
1268	IRIS_313-12353	-288.201	51.9717	-44.7752	0.985356	0.014644	japonica	non-glutinous	4055249	Lao People's Democratic Republic	Lao People's Democratic Republic	T	SEA	GJ-sbtrp
1269	IRIS_313-12354	139.103	53.941	15.076	0.985371	0.014629	indica	non-glutinous	4055248	Lao People's Democratic Republic	Lao People's Democratic Republic	T	SEA	XI-adm
1270	IRIS_313-10437	-301.806	58.8048	-216.485	0.985552	0.014448	japonica	non-glutinous	4056578	Japan	Japan	I	EAR	GJ-tmp
1271	IRIS_313-10441	97.4881	45.5863	-29.9397	0.985598	0.014402	indica	glutinous	4112070	Philippines	Philippines	P	SER	XI-adm
1272	IRIS_313-10444	-151.57	56.4452	61.7385	0.985643	0.014357	japonica	non-glutinous	4056572	Central America	Central America	0	CAM	GJ-trp
1273	IRIS_313-12355	141.591	52.1621	-15.075	0.985661	0.014339	indica	non-glutinous	4055247	Lao People's Democratic Republic	Lao People's Democratic Republic	T	SEA	XI-adm
1274	IRIS_313-10448	136.731	48.2133	3.71294	0.985674	0.014326	indica	non-glutinous	4055243	Philippines	Philippines	0	SER	XI-3
1275	IRIS_313-10449	64.7702	39.7382	-90.6672	0.985851	0.014149	indica	non-glutinous	4056569	China	China	P	EAS	XI-1A
1276	IRIS_313-10450	114.009	30.4954	-65.5281	0.985957	0.014043	indica	non-glutinous	4056568	China	China	T	EAS	XI-1A
1277	IRIS_313-10452	122.786	33.4473	-59.9128	0.986032	0.013968	indica	non-glutinous	4056566	China	China	P	EAS	XI-1A
1278	IRIS_313-10453	-281.09	50.9834	-10.2064	0.986038	0.013962	japonica	non-glutinous	4056565	China	China	T	EAS	GJ-adm
1279	IRIS_313-10428	131.18	51.3706	48.9329	0.986148	0.013852	indica	non-glutinous	0	Malaysia	Malaysia	T	SER	XI-3
1280	IRIS_313-10458	126.658	35.7156	-60.9835	0.986161	0.013839	indica	non-glutinous	4056560	China	China	P	EAS	XI-1A
1281	IRIS_313-10459	-222.961	48.2832	-56.0133	0.986183	0.013817	japonica	glutinous	0	China	China	I	EAS	GJ-adm
1282	IRIS_313-10429	-295.415	54.398	-195.84	0.986249	0.013751	japonica	non-glutinous	4056584	Taiwan	Taiwan	I	EAR	GJ-tmp
1283	IRIS_313-10469	-305.405	56.87	-200.548	0.986299	0.013701	japonica	non-glutinous	4056550	Japan	Japan	I	EAR	GJ-tmp
1284	IRIS_313-10430	-302.98	57.6654	-213.748	0.986552	0.013448	japonica	non-glutinous	4056583	Japan	Japan	0	EAR	GJ-tmp
1285	IRIS_313-10476	129.41	-13.2734	-32.6773	0.986597	0.013403	indica	non-glutinous	4056543	Sri Lanka	Sri Lanka	I	IOC	XI-2
1286	IRIS_313-10477	111.411	38.545	-11.179	0.986601	0.013399	indica	non-glutinous	4056542	China	China	0	EAS	XI-adm
1287	IRIS_313-10480	148.256	43.9776	24.9865	0.98665	0.01335	indica	non-glutinous	4112069	Indonesia	Indonesia	0	SER	XI-adm
1288	IRIS_313-10484	-34.1366	51.2979	-12.0625	0.986675	0.013325	japonica	non-glutinous	4056538	Philippines	Philippines	P	SER	XI-1A
1289	IRIS_313-10485	-275.014	55.807	119.059	0.986684	0.013316	japonica	non-glutinous	4056537	Philippines	Philippines	P	SER	GJ-trp
1290	IRIS_313-10489	-266.23	48.7537	111.053	0.986897	0.013103	japonica	non-glutinous	4056534	Philippines	Philippines	T	SER	GJ-trp
1291	IRIS_313-10497	120.063	37.0343	-65.1577	0.986916	0.013084	indica	non-glutinous	4056527	China	China	0	EAS	XI-1A
1292	IRIS_313-10502	125.51	26.2754	-56.1747	0.986962	0.013038	indica	non-glutinous	4056522	China	China	0	EAS	XI-1A
1293	IRIS_313-10503	122.238	32.1266	-34.7715	0.987003	0.012997	indica	non-glutinous	4056521	China	China	0	EAS	XI-1A
1294	IRIS_313-10504	128.458	29.2058	-66.453	0.987063	0.012937	indica	non-glutinous	4056520	China	China	0	EAS	XI-1A
1295	IRIS_313-10433	146.624	44.5914	30.3328	0.987216	0.012784	indica	non-glutinous	4055245	Philippines	Philippines	I	SER	XI-adm
1296	IRIS_313-10506	142.26	51.8823	34.3076	0.987366	0.012634	indica	non-glutinous	0	Thailand	Thailand	0	SEA	XI-3
1297	IRIS_313-10507	-245.989	51.8464	36.4958	0.987386	0.012614	japonica	glutinous	4056518	Taiwan	Taiwan	P	EAR	GJ-trp
1298	IRIS_313-10509	141.148	53.1144	20.049	0.987445	0.012555	indica	non-glutinous	4056516	Africa	West Africa	0	WAF	XI-3
1299	IRIS_313-10510	89.2018	38.8389	25.1199	0.987453	0.012547	indica	non-glutinous	4056515	Philippines	Philippines	T	SER	XI-adm
1300	IRIS_313-10513	126.863	39.4575	-6.29639	0.987476	0.012524	indica	non-glutinous	4056513	Philippines	Philippines	P	SER	XI-adm
1301	IRIS_313-10514	144.901	41.7043	25.2655	0.987512	0.012488	indica	non-glutinous	4055239	Philippines	Philippines	I	SER	XI-adm
1302	IRIS_313-10515	131.339	40.1642	-68.5048	0.987524	0.012476	indica	non-glutinous	4056512	Taiwan	Taiwan	I	EAR	XI-1A
1303	IRIS_313-10516	134.062	29.6199	21.5706	0.987611	0.012389	indica	non-glutinous	4056511	United States of America	United States of America	I	NAM	XI-adm
1304	IRIS_313-10517	134.457	52.9876	22.6739	0.987678	0.012322	indica	non-glutinous	4056510	Philippines	Philippines	P	SER	XI-3
1305	IRIS_313-10518	138.486	49.1463	-13.688	0.987678	0.012322	indica	non-glutinous	4055238	Myanmar	Myanmar	0	SEA	XI-adm
1306	IRIS_313-10519	128.456	-24.8877	-12.9593	0.987679	0.012321	indica	non-glutinous	4494442	India	India	P	SAC	XI-2
1307	IRIS_313-10531	-10.3439	-46.9	-0.621051	0.987726	0.012274	japonica	non-glutinous	4056503	India	India	P	SAC	admix
1308	IRIS_313-10534	-7.62495	-331.384	-2.69292	0.987743	0.012257	japonica	non-glutinous	4056500	India	India	P	SAC	cA (Aus)
1309	IRIS_313-10536	115.529	-35.6573	-11.3877	0.98792	0.01208	indica	non-glutinous	4055234	Tanzania	Tanzania	I	EAF	XI-2
1310	IRIS_313-10537	-149.464	-42.8633	-6.39976	0.987933	0.012067	japonica	non-glutinous	4494444	Bangladesh	Bangladesh	P	SAE	admix
1311	IRIS_313-10520	131.033	33.9496	4.42379	0.987951	0.012049	indica	non-glutinous	0	Myanmar	Myanmar	P	SEA	XI-adm
1312	IRIS_313-10539	113.363	-7.9215	-6.81933	0.988147	0.011853	indica	non-glutinous	4056498	Bangladesh	Bangladesh	P	SAE	XI-2
1313	IRIS_313-10541	-283.492	55.2507	118.319	0.988186	0.011814	japonica	non-glutinous	4056496	Guinea-Bissau	Guinea-Bissau	P	WAF	GJ-trp
1314	IRIS_313-10542	117.04	-13.713	-9.26235	0.988217	0.011783	indica	non-glutinous	4055233	India	India	0	SAC	XI-2
1315	IRIS_313-10543	-17.0959	-300.207	-6.3951	0.988222	0.011778	japonica	non-glutinous	4056495	India	India	T	SAC	cA (Aus)
1316	IRIS_313-10544	129.423	-11.6181	-34.8061	0.988248	0.011752	indica	non-glutinous	4056494	India	India	0	SAC	XI-2
1317	IRIS_313-10545	6.35634	-264.414	11.0196	0.988282	0.011718	indica	non-glutinous	4056493	_no_info	_no_info	T	na	cA (Aus)
1318	IRIS_313-10547	145.227	34.6554	11.9912	0.988292	0.011708	indica	non-glutinous	4055232	Myanmar	Myanmar	P	SEA	XI-adm
1319	IRIS_313-10521	-159.689	-72.2664	-3.04483	0.988449	0.011551	japonica	non-glutinous	4056509	India	India	0	SAC	cB (Bas)
1320	IRIS_313-10549	-13.8416	-304.262	-1.76611	0.988488	0.011512	japonica	non-glutinous	4056490	Pakistan	Pakistan	0	SAW	cA (Aus)
1321	IRIS_313-10550	145.533	40.3517	28.1211	0.988545	0.011455	indica	non-glutinous	4056489	Indonesia	Indonesia	i	SER	XI-adm
1322	IRIS_313-10552	-277.39	57.3191	115.043	0.988554	0.011446	japonica	non-glutinous	4055230	United States of America	United States of America	I	NAM	GJ-trp
1323	IRIS_313-10554	146.838	48.1642	6.05407	0.988603	0.011397	indica	glutinous	4056487	Viet Nam	Viet Nam	0	SEA	XI-3
1324	IRIS_313-10555	134.703	56.5585	14.8694	0.98869	0.01131	indica	non-glutinous	4055229	Viet Nam	Viet Nam	0	SEA	XI-3
1325	IRIS_313-10556	132.428	53.8369	34.4083	0.98875	0.01125	indica	non-glutinous	4494446	Viet Nam	Viet Nam	0	SEA	XI-3
1326	IRIS_313-10557	137.138	49.0307	41.7853	0.988862	0.011138	indica	non-glutinous	4494447	Cambodia	Cambodia	0	SEA	XI-3
1327	IRIS_313-10558	-276.384	44.9323	-182.108	0.988879	0.011121	japonica	non-glutinous	4056486	China	China	0	EAS	GJ-tmp
1328	IRIS_313-10522	-86.671	21.8138	35.6491	0.988909	0.011091	japonica	non-glutinous	4056508	Indonesia	Indonesia	0	SER	admix
1329	IRIS_313-10559	-277.54	48.3548	-174.725	0.988924	0.011076	japonica	non-glutinous	4056485	China	China	0	EAS	GJ-tmp
1330	IRIS_313-10560	114.658	36.4121	-72.11	0.988926	0.011074	indica	non-glutinous	4056484	China	China	0	EAS	XI-1A
1331	IRIS_313-10561	131.406	41.4454	-75.1001	0.98896	0.01104	indica	non-glutinous	4056483	China	China	0	EAS	XI-1A
1332	IRIS_313-10562	-194.794	17.3582	-96.7812	0.988995	0.011005	japonica	non-glutinous	4056482	China	China	0	EAS	GJ-adm
1333	IRIS_313-10563	-291.627	44.4025	-140.253	0.989072	0.010928	japonica	non-glutinous	4056481	China	China	P	EAS	GJ-tmp
1334	IRIS_313-10564	-298.925	58.6794	-215.609	0.989073	0.010927	japonica	non-glutinous	4056480	Japan	Japan	P	EAR	GJ-tmp
1335	IRIS_313-10565	140.084	45.7704	31.012	0.989074	0.010926	indica	non-glutinous	4056479	Indonesia	Indonesia	i	SER	XI-adm
1336	IRIS_313-10566	142.999	54.599	25.0568	0.989253	0.010747	indica	non-glutinous	4056478	Indonesia	Indonesia	I	SER	XI-adm
1337	IRIS_313-10567	-304.783	57.5471	-216.389	0.989275	0.010725	japonica	non-glutinous	4056477	Japan	Japan	0	EAR	GJ-tmp
1338	IRIS_313-10568	-301.311	55.199	-215.635	0.989314	0.010686	japonica	non-glutinous	4056476	Japan	Japan	P	EAR	GJ-tmp
1339	IRIS_313-10523	93.1664	-15.5236	11.5813	0.989397	0.010603	indica	non-glutinous	4494443	India	India	P	SAC	XI-adm
1340	IRIS_313-10569	-303.38	56.7413	-216.173	0.98957	0.01043	japonica	non-glutinous	4056475	Japan	Japan	0	EAR	GJ-tmp
1341	IRIS_313-10570	-302.998	59.5038	-207.774	0.989637	0.010363	japonica	non-glutinous	4056474	Japan	Japan	0	EAR	GJ-tmp
1342	IRIS_313-10572	107.421	7.97569	1.02311	0.98972	0.01028	indica	non-glutinous	4056472	Nigeria	Nigeria	0	WAF	XI-adm
1343	IRIS_313-10573	143.926	20.5045	-0.188477	0.989907	0.010093	indica	non-glutinous	4055228	Mali	Mali	0	WAF	XI-2
1344	IRIS_313-10574	135.429	22.8009	-3.40279	0.990014	0.009986	indica	non-glutinous	4055227	Sierra Leone	Sierra Leone	0	WAF	XI-adm
1345	IRIS_313-10575	129.516	38.1234	-10.2681	0.990048	0.009952	indica	non-glutinous	4055226	Myanmar	Myanmar	0	SEA	XI-adm
1346	IRIS_313-10576	126.817	-2.86482	1.99018	0.990119	0.009881	indica	non-glutinous	4055225	Sierra Leone	Sierra Leone	0	WAF	XI-2
1347	IRIS_313-10577	-245.494	32.4151	85.4677	0.990164	0.009836	japonica	glutinous	4056471	Philippines	Philippines	T	SER	GJ-trp
1348	IRIS_313-10524	135.647	56.0655	42.7068	0.99027	0.00973	indica	non-glutinous	4055237	Thailand	Thailand	0	SEA	XI-3
1349	IRIS_313-10580	-258.233	43.1308	117.832	0.990477	0.009523	japonica	non-glutinous	4056468	Philippines	Philippines	T	SER	GJ-trp
1350	IRIS_313-10581	-228.685	31.4191	112.495	0.990574	0.009426	japonica	non-glutinous	4056467	Philippines	Philippines	T	SER	GJ-trp
1351	IRIS_313-10582	-238.789	29.0392	79.8584	0.990586	0.009414	japonica	glutinous	4056466	Philippines	Philippines	T	SER	GJ-trp
1352	IRIS_313-10583	-253.284	38.5377	-161.859	0.990636	0.009364	japonica	non-glutinous	4055224	China	China	0	EAS	GJ-tmp
1353	IRIS_313-10585	-41.3475	45.6483	-102.648	0.990885	0.009115	japonica	non-glutinous	4056465	Japan	Japan	0	EAR	admix
1354	IRIS_313-10587	-13.4191	-339.299	5.39144	0.990941	0.009059	japonica	non-glutinous	4056463	Bangladesh	Bangladesh	P	SAE	cA (Aus)
1355	IRIS_313-10525	143.784	58.4726	45.0064	0.991073	0.008927	indica	non-glutinous	4055236	Indonesia	Indonesia	0	SER	XI-3
1356	IRIS_313-10592	-14.7874	-344.871	8.59768	0.991095	0.008905	japonica	non-glutinous	4056460	Bangladesh	Bangladesh	P	SAE	cA (Aus)
1357	IRIS_313-10593	-7.31577	-324.398	10.5639	0.991131	0.008869	japonica	non-glutinous	4056459	Bangladesh	Bangladesh	P	SAE	cA (Aus)
1358	IRIS_313-10594	-5.00717	-325.759	7.7854	0.991185	0.008815	japonica	non-glutinous	4056458	Bangladesh	Bangladesh	P	SAE	cA (Aus)
1359	IRIS_313-10595	-11.222	-332.329	5.64728	0.991229	0.008771	japonica	non-glutinous	4056457	Bangladesh	Bangladesh	P	SAE	cA (Aus)
1360	IRIS_313-10598	-16.6367	-341.258	7.44799	0.991373	0.008627	japonica	non-glutinous	4056454	Bangladesh	Bangladesh	P	SAE	cA (Aus)
1361	IRIS_313-10526	125.405	4.76532	-1.84134	0.991402	0.008598	indica	non-glutinous	4055235	India	India	0	SAC	XI-2
1362	IRIS_313-10600	-2.95679	-325.308	8.02459	0.991408	0.008592	japonica	non-glutinous	4056452	Bangladesh	Bangladesh	P	SAE	cA (Aus)
1363	IRIS_313-10602	-2.90444	-330.04	6.32647	0.991413	0.008587	japonica	non-glutinous	4056450	Bangladesh	Bangladesh	P	SAE	cA (Aus)
1364	IRIS_313-10603	-7.82399	-316.213	8.4369	0.99143	0.00857	japonica	non-glutinous	4056449	Bangladesh	Bangladesh	P	SAE	cA (Aus)
1365	IRIS_313-10604	-5.52115	-335.019	5.76508	0.99155	0.00845	japonica	non-glutinous	4056448	Bangladesh	Bangladesh	P	SAE	cA (Aus)
1366	IRIS_313-10605	-7.24631	-300.386	14.8554	0.991553	0.008447	japonica	non-glutinous	4056447	Bangladesh	Bangladesh	P	SAE	cA (Aus)
1367	IRIS_313-10606	-5.32212	-322.018	7.84648	0.991568	0.008432	japonica	non-glutinous	4056446	Bangladesh	Bangladesh	P	SAE	cA (Aus)
1368	IRIS_313-10608	-25.6954	-319.999	6.27019	0.991614	0.008386	japonica	non-glutinous	4056444	India	India	0	SAC	cA (Aus)
1369	IRIS_313-10527	109.143	-23.8661	-25.7809	0.99173	0.00827	indica	non-glutinous	4056507	India	India	P	SAC	XI-2
1370	IRIS_313-10609	89.088	-49.9683	-14.4821	0.991748	0.008252	indica	non-glutinous	4056443	Sri Lanka	Sri Lanka	T	IOC	XI-adm
1371	IRIS_313-10610	137.14	-6.49804	-26.0447	0.991916	0.008084	indica	non-glutinous	4112068	Sri Lanka	Sri Lanka	T	IOC	XI-2
1372	IRIS_313-10623	-1.19947	-327.569	0.169913	0.991923	0.008077	japonica	non-glutinous	4056432	Nepal	Nepal	0	SAC	cA (Aus)
1373	IRIS_313-10628	148.437	31.1322	-15.4002	0.992097	0.007903	indica	non-glutinous	4112067	India	India	T	SAC	XI-2
1374	IRIS_313-10631	-299.932	57.5349	-199.739	0.992225	0.007775	japonica	non-glutinous	4056427	Taiwan	Taiwan	0	EAR	GJ-tmp
1375	IRIS_313-10614	88.3373	26.6037	-11.7262	0.992258	0.007742	indica	non-glutinous	4055221	Hong Kong	Hong Kong	0	EAS	XI-adm
1376	IRIS_313-10640	127.619	14.0633	-1.33898	0.99228	0.00772	indica	glutinous	4055217	India	India	P	SAC	XI-2
1377	IRIS_313-10642	-300.155	56.7734	-212.554	0.992347	0.007653	japonica	non-glutinous	4056418	Japan	Japan	P	EAR	GJ-tmp
1378	IRIS_313-10644	-281.794	46.9849	104.837	0.992352	0.007648	japonica	non-glutinous	4056416	Philippines	Philippines	T	SER	GJ-trp
1379	IRIS_313-10645	-285.781	50.0996	93.9132	0.992359	0.007641	japonica	non-glutinous	4056415	Philippines	Philippines	T	SER	GJ-trp
1380	IRIS_313-10648	146.466	62.0134	11.365	0.992387	0.007613	indica	non-glutinous	4112031	Cambodia	Cambodia	0	SEA	XI-3
1381	IRIS_313-10649	-255.251	47.5645	91.1517	0.992433	0.007567	japonica	non-glutinous	4056412	Philippines	Philippines	I	SER	GJ-trp
1382	IRIS_313-10650	131.287	53.3964	47.7699	0.99249	0.00751	indica	non-glutinous	0	Thailand	Thailand	T	SEA	XI-3
1383	IRIS_313-10651	131.864	46.1629	-11.6139	0.992503	0.007497	indica	glutinous	4055216	Lao People's Democratic Republic	Lao People's Democratic Republic	T	SEA	XI-adm
1384	IRIS_313-10652	107.183	4.09659	23.0896	0.992522	0.007478	indica	non-glutinous	4056411	Lao People's Democratic Republic	Lao People's Democratic Republic	T	SEA	XI-3
1385	IRIS_313-10653	-268.329	44.5521	-17.2084	0.992586	0.007414	japonica	glutinous	4056410	Lao People's Democratic Republic	Lao People's Democratic Republic	0	SEA	GJ-sbtrp
1386	IRIS_313-10654	126.142	31.7929	6.77196	0.992684	0.007316	indica	non-glutinous	4056409	Lao People's Democratic Republic	Lao People's Democratic Republic	P	SEA	XI-3
1387	IRIS_313-10655	121.96	30.5976	-1.60639	0.992724	0.007276	indica	glutinous	4056408	Lao People's Democratic Republic	Lao People's Democratic Republic	0	SEA	XI-adm
1388	IRIS_313-10656	-265.946	46.3416	-6.13299	0.992796	0.007204	japonica	glutinous	4056407	Lao People's Democratic Republic	Lao People's Democratic Republic	0	SEA	GJ-sbtrp
1389	IRIS_313-10657	-250.704	38.597	-21.3473	0.992844	0.007156	japonica	non-glutinous	4494448	Lao People's Democratic Republic	Lao People's Democratic Republic	0	SEA	GJ-sbtrp
1390	IRIS_313-10659	130.564	55.7128	-2.07949	0.992867	0.007133	indica	glutinous	4056405	Lao People's Democratic Republic	Lao People's Democratic Republic	0	SEA	XI-3
1391	IRIS_313-10660	-270.292	47.0705	-10.6355	0.992911	0.007089	japonica	glutinous	4056404	Lao People's Democratic Republic	Lao People's Democratic Republic	0	SEA	GJ-sbtrp
1392	IRIS_313-10661	128.916	-13.9492	-22.1844	0.992952	0.007048	indica	non-glutinous	4056403	Sri Lanka	Sri Lanka	T	IOC	XI-2
1393	IRIS_313-10662	123.192	-33.7218	-22.0854	0.993058	0.006942	indica	non-glutinous	4056402	Sri Lanka	Sri Lanka	T	IOC	XI-2
1394	IRIS_313-10617	-113.038	-23.5928	-42.0249	0.99307	0.00693	japonica	non-glutinous	4056438	Uzbekistan	Uzbekistan	0	WAS	GJ-tmp
1395	IRIS_313-10664	138.983	6.7538	-8.31942	0.993071	0.006929	indica	non-glutinous	4056401	India	India	0	SAC	XI-2
1396	IRIS_313-10666	152.242	58.572	-2.68661	0.993122	0.006878	indica	non-glutinous	4056400	India	India	0	SAC	XI-adm
1397	IRIS_313-10667	108.473	-20.2688	-9.80381	0.993127	0.006873	indica	non-glutinous	4056399	India	India	0	SAC	XI-2
1398	IRIS_313-10668	134.552	12.8354	-7.67901	0.993137	0.006863	indica	glutinous	4055213	India	India	0	SAC	XI-adm
1399	IRIS_313-10670	-176.235	-43.0185	-8.62559	0.993142	0.006858	japonica	non-glutinous	4112066	India	India	0	SAC	cB (Bas)
1400	IRIS_313-10671	91.558	-43.4071	-20.1439	0.993231	0.006769	indica	non-glutinous	4056398	India	India	0	SAC	XI-adm
1401	IRIS_313-10618	-306.097	58.0611	-220.337	0.993237	0.006763	japonica	non-glutinous	4056437	Uzbekistan	Uzbekistan	P	EUR	GJ-tmp
1402	IRIS_313-10673	-3.75861	-333.22	1.52981	0.993339	0.006661	japonica	non-glutinous	4056397	India	India	T	SAC	cA (Aus)
1403	IRIS_313-10674	134.212	39.1203	-3.0134	0.99335	0.00665	indica	non-glutinous	4055210	India	India	0	SAC	XI-adm
1404	IRIS_313-10675	124.77	-1.13545	-18.1859	0.993358	0.006642	indica	non-glutinous	4056396	India	India	T	SAC	XI-adm
1405	IRIS_313-10676	66.4826	-110.531	-13.1473	0.993395	0.006605	indica	non-glutinous	4056395	India	India	T	SAC	admix
1406	IRIS_313-10677	-308.149	59.4162	-211.69	0.993395	0.006605	japonica	non-glutinous	4056394	Japan	Japan	P	EAR	GJ-tmp
1407	IRIS_313-10678	146.169	15.5753	-7.04162	0.9934	0.0066	indica	non-glutinous	4112065	Madagascar	Madagascar	0	IOC	XI-2
1408	IRIS_313-10679	-277.025	45.3123	-28.308	0.99341	0.00659	japonica	glutinous	4112064	Lao People's Democratic Republic	Lao People's Democratic Republic	T	SEA	GJ-sbtrp
1409	IRIS_313-10680	140.413	50.5157	1.39843	0.993467	0.006533	indica	non-glutinous	4112030	Lao People's Democratic Republic	Lao People's Democratic Republic	T	SEA	XI-3
1410	IRIS_313-10681	126.416	58.818	7.31005	0.993593	0.006407	indica	non-glutinous	4056393	Lao People's Democratic Republic	Lao People's Democratic Republic	T	SEA	XI-3
1411	IRIS_313-10682	140.258	53.9606	15.3177	0.993604	0.006396	indica	glutinous	4056392	Lao People's Democratic Republic	Lao People's Democratic Republic	T	SEA	XI-3
1412	IRIS_313-10619	-276.779	52.123	116.562	0.993627	0.006373	japonica	non-glutinous	4056436	Brazil	Brazil	P	SAM	GJ-trp
1413	IRIS_313-10683	139.271	51.0783	15.5924	0.993684	0.006316	indica	glutinous	4056391	Lao People's Democratic Republic	Lao People's Democratic Republic	T	SEA	XI-3
1414	IRIS_313-10687	130.906	58.8863	57.7299	0.993765	0.006235	indica	non-glutinous	0	Malaysia	Malaysia	T	SER	XI-3
1415	IRIS_313-10688	135.599	61.6566	37.5555	0.993801	0.006199	indica	non-glutinous	4494451	Malaysia	Malaysia	T	SER	XI-3
1416	IRIS_313-10689	-253.577	39.7922	78.8372	0.99384	0.00616	japonica	non-glutinous	4055209	Indonesia	Indonesia	T	SER	GJ-trp
1417	IRIS_313-10692	128.977	56.0734	38.3583	0.993868	0.006132	indica	non-glutinous	4112062	Indonesia	Indonesia	T	SER	XI-3
1418	IRIS_313-10620	-279.004	51.6465	123.724	0.993882	0.006118	japonica	non-glutinous	4056435	Brazil	Brazil	P	SAM	GJ-trp
1419	IRIS_313-10693	-258.18	38.0209	76.7797	0.99389	0.00611	japonica	non-glutinous	4055208	Indonesia	Indonesia	T	SER	GJ-trp
1420	IRIS_313-10694	135.121	54.7229	30.0157	0.993904	0.006096	indica	non-glutinous	4055207	Malaysia	Malaysia	T	SER	XI-3
1421	IRIS_313-10695	144.288	59.6519	32.0851	0.993972	0.006028	indica	non-glutinous	4055206	Malaysia	Malaysia	T	SER	XI-3
1422	IRIS_313-10697	126.028	57.5198	56.9084	0.994004	0.005996	indica	non-glutinous	4055205	Malaysia	Malaysia	T	SER	XI-3
1423	IRIS_313-10698	142.23	54.1542	51.0075	0.994019	0.005981	indica	non-glutinous	4056388	Malaysia	Malaysia	T	SER	XI-3
1424	IRIS_313-10699	129.027	52.0482	52.3866	0.994036	0.005964	indica	non-glutinous	0	Malaysia	Malaysia	T	SER	XI-3
1425	IRIS_313-10700	124.738	54.8121	41.5978	0.994063	0.005937	indica	non-glutinous	0	Malaysia	Malaysia	T	SER	XI-3
1426	IRIS_313-10701	136.388	55.3019	50.6682	0.994156	0.005844	indica	non-glutinous	0	Malaysia	Malaysia	T	SER	XI-3
1427	IRIS_313-10703	-262.785	42.7984	106.463	0.994175	0.005825	japonica	non-glutinous	4056387	Malaysia	Malaysia	T	SER	GJ-trp
1428	IRIS_313-10704	-259.978	46.5883	98.9884	0.994178	0.005822	japonica	non-glutinous	4056386	Malaysia	Malaysia	T	SER	GJ-trp
1429	IRIS_313-10705	18.6248	25.2832	22.7714	0.994274	0.005726	indica	glutinous	4055204	Malaysia	Malaysia	T	SER	XI-adm
1430	IRIS_313-10706	140.415	55.9739	49.6849	0.994502	0.005498	indica	non-glutinous	0	Malaysia	Malaysia	T	SER	XI-3
1431	IRIS_313-10717	126.071	-48.3223	-19.8749	0.994518	0.005482	indica	non-glutinous	4056379	Sri Lanka	Sri Lanka	T	IOC	XI-2
1432	IRIS_313-10718	-63.6426	-281.67	-0.598471	0.994611	0.005389	japonica	non-glutinous	4055201	Sri Lanka	Sri Lanka	T	IOC	cA (Aus)
1433	IRIS_313-10719	126.658	-15.8213	-24.5665	0.994619	0.005381	indica	non-glutinous	4056378	Sri Lanka	Sri Lanka	T	IOC	XI-2
1434	IRIS_313-10720	101.537	1.79553	5.15558	0.994635	0.005365	indica	non-glutinous	4112061	Sri Lanka	Sri Lanka	T	IOC	XI-adm
1435	IRIS_313-10721	121.414	-20.0867	-24.7665	0.994646	0.005354	indica	non-glutinous	4056377	Sri Lanka	Sri Lanka	T	IOC	XI-2
1436	IRIS_313-10722	-269.479	44.6931	100.864	0.994656	0.005344	japonica	non-glutinous	4056376	Sri Lanka	Sri Lanka	T	IOC	GJ-trp
1437	IRIS_313-10723	137.239	24.9138	-5.58438	0.994669	0.005331	indica	non-glutinous	4055200	Senegal	Senegal	0	WAF	XI-2
1438	IRIS_313-10724	143.172	45.0056	29.6841	0.994683	0.005317	indica	non-glutinous	4494452	Senegal	Senegal	0	WAF	XI-3
1439	IRIS_313-10725	145.398	28.6994	16.7253	0.994683	0.005317	indica	non-glutinous	4055199	Senegal	Senegal	0	WAF	XI-adm
1440	IRIS_313-10726	138.082	57.4189	42.4558	0.994684	0.005316	indica	non-glutinous	4055198	Senegal	Senegal	0	WAF	XI-3
1441	IRIS_313-10707	134.862	55.432	49.8198	0.99472	0.00528	indica	non-glutinous	0	Malaysia	Malaysia	T	SER	XI-3
1442	IRIS_313-10727	134.742	37.4987	20.8507	0.994782	0.005218	indica	non-glutinous	0	Senegal	Senegal	0	WAF	XI-3
1443	IRIS_313-10728	145.511	22.4321	3.40357	0.994814	0.005186	indica	non-glutinous	4055197	Senegal	Senegal	0	WAF	XI-adm
1444	IRIS_313-10729	-86.455	-62.0391	-25.6391	0.994833	0.005167	japonica	non-glutinous	4056375	Cote d'Ivoire	Cote d'Ivoire	0	WAF	admix
1445	IRIS_313-10730	-275.716	54.5375	98.043	0.994851	0.005149	japonica	non-glutinous	4055196	Cote d'Ivoire	Cote d'Ivoire	0	WAF	GJ-trp
1446	IRIS_313-10731	128.031	28.5472	-64.4272	0.994875	0.005125	indica	non-glutinous	4056374	Nepal	Nepal	0	SAC	XI-1A
1447	IRIS_313-10732	-167.413	-62.7659	-0.743661	0.994929	0.005071	japonica	non-glutinous	4055195	Nepal	Nepal	0	SAC	cB (Bas)
1448	IRIS_313-10733	139.846	45.4163	-9.18153	0.994958	0.005042	indica	non-glutinous	4056373	Nepal	Nepal	0	SAC	XI-adm
1449	IRIS_313-10734	-9.70192	-303.319	2.11187	0.994968	0.005032	japonica	non-glutinous	4056372	Nepal	Nepal	P	SAC	cA (Aus)
1450	IRIS_313-10735	-2.55473	-308.346	-1.37422	0.995002	0.004998	japonica	non-glutinous	4056371	Nepal	Nepal	P	SAC	cA (Aus)
1451	IRIS_313-10736	-29.2064	-326.33	3.78628	0.995049	0.004951	japonica	non-glutinous	4055194	Nepal	Nepal	0	SAC	cA (Aus)
1452	IRIS_313-10708	-278.203	57.1641	115.582	0.995069	0.004931	japonica	non-glutinous	4056385	United States of America	United States of America	I	NAM	GJ-trp
1453	IRIS_313-10737	-16.9613	-258.972	-2.19097	0.995075	0.004925	japonica	non-glutinous	4056370	Nepal	Nepal	P	SAC	cA (Aus)
1454	IRIS_313-10738	-82.0555	55.6206	53.9824	0.995084	0.004916	japonica	non-glutinous	4056369	Indonesia	Indonesia	T	SER	admix
1455	IRIS_313-10739	-17.5203	46.2045	18.8141	0.9951	0.0049	japonica	non-glutinous	4056368	Indonesia	Indonesia	T	SER	XI-adm
1456	IRIS_313-10740	-238.884	35.8487	79.7138	0.995116	0.004884	japonica	glutinous	4056367	Indonesia	Indonesia	T	SER	GJ-trp
1457	IRIS_313-10741	-237.522	35.1718	77.1452	0.995145	0.004855	japonica	non-glutinous	4056366	Indonesia	Indonesia	T	SER	GJ-trp
1458	IRIS_313-10742	131.633	56.1314	41.3827	0.995156	0.004844	indica	non-glutinous	4056365	Indonesia	Indonesia	T	SER	XI-3
1459	IRIS_313-10743	-266.151	51.4489	91.8519	0.995157	0.004843	japonica	non-glutinous	4056364	Indonesia	Indonesia	T	SER	GJ-trp
1460	IRIS_313-10744	-245.398	41.7037	71.3695	0.9952	0.0048	japonica	non-glutinous	4056363	Indonesia	Indonesia	T	SER	GJ-trp
1461	IRIS_313-10745	-233.736	31.9959	85.0508	0.995288	0.004712	japonica	non-glutinous	4056362	Indonesia	Indonesia	T	SER	GJ-trp
1462	IRIS_313-10746	-244.476	35.9286	64.3661	0.995298	0.004702	japonica	non-glutinous	0	Indonesia	Indonesia	T	SER	GJ-trp
1463	IRIS_313-10710	-282.19	59.527	117.005	0.995304	0.004696	japonica	non-glutinous	4055203	Surinam	Surinam	T	SAM	GJ-trp
1464	IRIS_313-10748	146.49	48.3922	-8.4049	0.99531	0.00469	indica	non-glutinous	4056361	Viet Nam	Viet Nam	T	SEA	XI-adm
1465	IRIS_313-10749	147.677	58.4446	32.6862	0.995324	0.004676	indica	non-glutinous	4055193	Viet Nam	Viet Nam	T	SEA	XI-3
1466	IRIS_313-10750	137.019	51.3293	27.4296	0.995335	0.004665	indica	non-glutinous	4494453	Viet Nam	Viet Nam	T	SEA	XI-3
1467	IRIS_313-10751	109.236	27.2129	0.0799437	0.995343	0.004657	indica	non-glutinous	4056360	Viet Nam	Viet Nam	T	SEA	XI-adm
1468	IRIS_313-10752	-277.705	53.0293	80.4187	0.995376	0.004624	japonica	non-glutinous	4056359	United States of America	United States of America	I	NAM	GJ-trp
1469	IRIS_313-10753	124.908	48.659	-34.4665	0.99539	0.00461	indica	non-glutinous	4055192	United States of America	United States of America	I	NAM	XI-1B
1470	IRIS_313-10754	134.923	51.7675	-27.7958	0.995483	0.004517	indica	non-glutinous	4055191	India	India	0	SAC	XI-adm
1471	IRIS_313-10755	133.694	53.1365	21.5133	0.995523	0.004477	indica	glutinous	4055190	Viet Nam	Viet Nam	T	SEA	XI-3
1472	IRIS_313-10756	133.188	15.761	-9.13177	0.995529	0.004471	indica	non-glutinous	4056358	India	India	I	SAC	XI-2
1473	IRIS_313-10711	-248.075	44.0183	109.97	0.995531	0.004469	japonica	non-glutinous	4112007	Liberia	Liberia	0	WAF	GJ-trp
1474	IRIS_313-10757	126.126	54.237	45.2626	0.995556	0.004444	indica	non-glutinous	0	Thailand	Thailand	0	SEA	XI-3
1475	IRIS_313-10758	-262.392	45.527	86.2797	0.995572	0.004428	japonica	non-glutinous	4056357	Indonesia	Indonesia	T	SER	GJ-trp
1476	IRIS_313-10759	-242.209	39.7642	72.4209	0.995645	0.004355	japonica	non-glutinous	4055189	Indonesia	Indonesia	T	SER	GJ-trp
1477	IRIS_313-10760	131.813	45.9362	31.5317	0.995681	0.004319	indica	non-glutinous	0	Indonesia	Indonesia	T	SER	XI-3
1478	IRIS_313-10761	-256.713	37.7181	76.5806	0.995683	0.004317	japonica	non-glutinous	4055188	Indonesia	Indonesia	T	SER	GJ-trp
1479	IRIS_313-10762	134.839	62.9306	23.8619	0.995717	0.004283	indica	non-glutinous	4056356	Indonesia	Indonesia	T	SER	XI-3
1480	IRIS_313-10765	-244.615	39.3772	57.7716	0.995762	0.004238	japonica	non-glutinous	4055186	Indonesia	Indonesia	T	SER	GJ-trp
1481	IRIS_313-10712	-278.116	45.5749	107.297	0.995795	0.004205	japonica	non-glutinous	4056383	Cote d'Ivoire	Cote d'Ivoire	0	WAF	GJ-trp
1482	IRIS_313-10767	-256.176	40.2406	81.3941	0.99585	0.00415	japonica	non-glutinous	4055185	Indonesia	Indonesia	T	SER	GJ-trp
1483	IRIS_313-10768	117.165	53.159	36.7594	0.99586	0.00414	indica	non-glutinous	4112006	Indonesia	Indonesia	T	SER	XI-3
1484	IRIS_313-10769	146.432	46.9853	17.5832	0.995916	0.004084	indica	non-glutinous	4056353	Indonesia	Indonesia	T	SER	XI-adm
1485	IRIS_313-10770	-244.699	39.1897	92.4066	0.995923	0.004077	japonica	non-glutinous	4055184	Indonesia	Indonesia	T	SER	GJ-trp
1486	IRIS_313-10771	-162.014	66.628	74.8495	0.995932	0.004068	japonica	non-glutinous	4112028	Indonesia	Indonesia	T	SER	GJ-trp
1487	IRIS_313-10772	137.331	57.3868	48.5547	0.996013	0.003987	indica	non-glutinous	4056352	Indonesia	Indonesia	T	SER	XI-3
1488	IRIS_313-10773	-246.32	34.7291	75.6167	0.996024	0.003976	japonica	non-glutinous	4056351	Indonesia	Indonesia	T	SER	GJ-trp
1489	IRIS_313-10774	145.519	53.6446	23.1477	0.99605	0.00395	indica	non-glutinous	4056350	Indonesia	Indonesia	T	SER	XI-adm
1490	IRIS_313-10775	138.855	38.1248	27.6441	0.996051	0.003949	indica	non-glutinous	4055183	Indonesia	Indonesia	T	SER	XI-adm
1491	IRIS_313-10776	-264.829	46.1893	107.627	0.996055	0.003945	japonica	non-glutinous	4112027	Indonesia	Indonesia	T	SER	GJ-trp
1492	IRIS_313-10777	129.91	61.3942	43.3663	0.996069	0.003931	indica	non-glutinous	4056349	Indonesia	Indonesia	T	SER	XI-3
1493	IRIS_313-10779	121.357	54.5497	44.9967	0.996107	0.003893	indica	non-glutinous	4055182	Indonesia	Indonesia	T	SER	XI-3
1494	IRIS_313-10780	-260.579	44.8279	60.1301	0.996108	0.003892	japonica	glutinous	4056348	Indonesia	Indonesia	T	SER	GJ-trp
1495	IRIS_313-10781	-240.861	39.3041	75.3997	0.996108	0.003892	japonica	glutinous	4056347	Indonesia	Indonesia	T	SER	GJ-trp
1496	IRIS_313-10782	119.753	52.835	46.8586	0.996127	0.003873	indica	non-glutinous	4055181	Indonesia	Indonesia	T	SER	XI-3
1497	IRIS_313-10783	-240.438	38.7292	60.9058	0.996148	0.003852	japonica	non-glutinous	4056346	Indonesia	Indonesia	T	SER	GJ-trp
1498	IRIS_313-10784	-240.101	35.2361	77.9819	0.996162	0.003838	japonica	non-glutinous	4055180	Indonesia	Indonesia	T	SER	GJ-trp
1499	IRIS_313-10785	-229.04	34.9148	82.1619	0.996165	0.003835	japonica	non-glutinous	4056345	Indonesia	Indonesia	T	SER	GJ-trp
1500	IRIS_313-10786	38.0182	50.544	44.2746	0.996187	0.003813	indica	non-glutinous	0	Indonesia	Indonesia	T	SER	XI-3
1501	IRIS_313-10787	-33.4725	57.2398	44.4103	0.996188	0.003812	japonica	non-glutinous	0	Indonesia	Indonesia	T	SER	XI-3
1502	IRIS_313-10788	-246.582	38.1825	70.4499	0.996199	0.003801	japonica	non-glutinous	4494454	Indonesia	Indonesia	T	SER	GJ-trp
1503	IRIS_313-10789	-246.926	35.8938	74.2341	0.996206	0.003794	japonica	non-glutinous	4056344	Indonesia	Indonesia	T	SER	GJ-trp
1504	IRIS_313-10790	-239.989	38.3515	66.3305	0.996207	0.003793	japonica	non-glutinous	0	Indonesia	Indonesia	T	SER	GJ-trp
1505	IRIS_313-10791	138.921	69.6375	43.5092	0.996211	0.003789	indica	non-glutinous	4056343	Indonesia	Indonesia	T	SER	XI-3
1506	IRIS_313-10792	131.1	51.4581	25.2037	0.996272	0.003728	indica	non-glutinous	4056342	Indonesia	Indonesia	T	SER	XI-3
1507	IRIS_313-10793	-254.681	55.182	95.8751	0.996301	0.003699	japonica	non-glutinous	4055179	Indonesia	Indonesia	T	SER	GJ-trp
1508	IRIS_313-10794	-272.069	54.7004	85.1509	0.996317	0.003683	japonica	non-glutinous	4056341	Indonesia	Indonesia	T	SER	GJ-trp
1509	IRIS_313-10795	-271.431	54.3753	105.779	0.996319	0.003681	japonica	non-glutinous	4056340	Indonesia	Indonesia	T	SER	GJ-trp
1510	IRIS_313-10796	-257.058	49.9442	91.4895	0.99633	0.00367	japonica	non-glutinous	4056339	Indonesia	Indonesia	T	SER	GJ-trp
1511	IRIS_313-10715	103.259	-27.8685	-23.6175	0.996333	0.003667	indica	non-glutinous	4056381	Sri Lanka	Sri Lanka	T	IOC	XI-2
1512	IRIS_313-10797	125.773	62.3885	57.9633	0.996349	0.003651	indica	non-glutinous	4112026	Indonesia	Indonesia	T	SER	XI-3
1513	IRIS_313-10798	-275.484	51.0928	106.238	0.996368	0.003632	japonica	non-glutinous	4112005	Indonesia	Indonesia	T	SER	GJ-trp
1514	IRIS_313-10799	-263.346	49.9777	108.624	0.996377	0.003623	japonica	non-glutinous	4056338	Indonesia	Indonesia	T	SER	GJ-trp
1515	IRIS_313-10800	-245.169	40.5441	87.6462	0.996432	0.003568	japonica	non-glutinous	4055178	Indonesia	Indonesia	T	SER	GJ-trp
1516	IRIS_313-10716	127.034	-12.3035	-30.4303	0.996445	0.003555	indica	non-glutinous	4056380	Sri Lanka	Sri Lanka	T	IOC	XI-2
1517	IRIS_313-10810	128.713	59.4416	33.6188	0.996455	0.003545	indica	non-glutinous	4494457	Indonesia	Indonesia	T	SER	XI-3
1518	IRIS_313-10811	142.309	36.5747	31.2218	0.996533	0.003467	indica	non-glutinous	4055174	Indonesia	Indonesia	T	SER	XI-adm
1519	IRIS_313-10812	142.782	63.4858	45.198	0.996544	0.003456	indica	non-glutinous	4494458	Indonesia	Indonesia	T	SER	XI-3
1520	IRIS_313-10813	121.536	54.9037	30.6759	0.996548	0.003452	indica	non-glutinous	4055173	Indonesia	Indonesia	T	SER	XI-3
1521	IRIS_313-10814	115.865	64.8258	55.0714	0.99655	0.00345	indica	non-glutinous	4055172	Indonesia	Indonesia	T	SER	XI-3
1522	IRIS_313-10815	-246.123	37.7469	71.981	0.996557	0.003443	japonica	non-glutinous	4055171	Indonesia	Indonesia	T	SER	GJ-trp
1523	IRIS_313-10816	-230.339	33.9925	79.9021	0.996619	0.003381	japonica	non-glutinous	4055170	Indonesia	Indonesia	T	SER	GJ-trp
1524	IRIS_313-10817	-237.31	38.5705	70.2532	0.996623	0.003377	japonica	non-glutinous	4494459	Indonesia	Indonesia	T	SER	GJ-trp
1525	IRIS_313-10818	122.098	57.6162	38.4071	0.996626	0.003374	indica	non-glutinous	4055169	Indonesia	Indonesia	T	SER	XI-3
1526	IRIS_313-10819	120.165	41.682	24.2122	0.996671	0.003329	indica	non-glutinous	4056336	Indonesia	Indonesia	T	SER	XI-3
1527	IRIS_313-10801	-185.207	12.4223	38.4184	0.996697	0.003303	japonica	non-glutinous	4055177	Indonesia	Indonesia	T	SER	GJ-trp
1528	IRIS_313-10820	115.315	56.3831	40.3556	0.996716	0.003284	indica	non-glutinous	4055168	Indonesia	Indonesia	T	SER	XI-3
1529	IRIS_313-10821	134.277	51.5777	43.6328	0.996731	0.003269	indica	non-glutinous	4056335	Indonesia	Indonesia	T	SER	XI-3
1530	IRIS_313-10822	122.538	44.9088	23.9484	0.996748	0.003252	indica	non-glutinous	4055167	Indonesia	Indonesia	T	SER	XI-3
1531	IRIS_313-10823	130.78	42.7805	35.1321	0.996809	0.003191	indica	non-glutinous	4056334	Indonesia	Indonesia	T	SER	XI-3
1532	IRIS_313-10824	137.56	66.8144	47.7004	0.996837	0.003163	indica	non-glutinous	4055166	Indonesia	Indonesia	T	SER	XI-3
1533	IRIS_313-10825	130.049	26.8184	8.39233	0.996855	0.003145	indica	non-glutinous	4055165	Sierra Leone	Sierra Leone	0	WAF	XI-adm
1534	IRIS_313-10827	-280.785	53.0669	118.093	0.996919	0.003081	japonica	non-glutinous	4056333	Philippines	Philippines	T	SER	GJ-trp
1535	IRIS_313-10828	-279.177	48.3719	115.951	0.996932	0.003068	japonica	non-glutinous	4056332	Philippines	Philippines	T	SER	GJ-trp
1536	IRIS_313-10829	-265.144	41.2983	111.455	0.996966	0.003034	japonica	non-glutinous	4056331	Philippines	Philippines	T	SER	GJ-trp
1537	IRIS_313-10802	-251.6	37.3076	82.4095	0.996974	0.003026	japonica	non-glutinous	0	Indonesia	Indonesia	T	SER	GJ-trp
1538	IRIS_313-10830	-269.324	52.313	117.329	0.996976	0.003024	japonica	non-glutinous	4056330	Philippines	Philippines	T	SER	GJ-trp
1539	IRIS_313-10832	-279.441	51.9082	112.585	0.997014	0.002986	japonica	glutinous	4056329	Philippines	Philippines	T	SER	GJ-trp
1540	IRIS_313-10833	132.464	6.8693	-38.588	0.99706	0.00294	indica	non-glutinous	4056328	India	India	I	SAC	XI-2
1541	IRIS_313-10834	-272.694	33.0091	-31.4523	0.997103	0.002897	japonica	non-glutinous	4056327	India	India	I	SAC	GJ-sbtrp
1542	IRIS_313-10835	128.853	1.64268	-39.7713	0.997119	0.002881	indica	non-glutinous	4056326	India	India	I	SAC	XI-2
1543	IRIS_313-10836	137.283	14.0617	-40.4804	0.997122	0.002878	indica	non-glutinous	4056325	India	India	I	SAC	XI-2
1544	IRIS_313-10837	-298.983	48.7158	-168.438	0.997169	0.002831	japonica	non-glutinous	4112025	Korea, Republic of	Korea, Republic of	T	EAR	GJ-tmp
1545	IRIS_313-10838	-293.986	51.832	-188.277	0.99718	0.00282	japonica	non-glutinous	4112024	Korea, Republic of	Korea, Republic of	T	EAR	GJ-tmp
1546	IRIS_313-10839	-304.117	58.4541	-210.777	0.997191	0.002809	japonica	non-glutinous	4055164	Korea, Republic of	Korea, Republic of	T	EAR	GJ-tmp
1547	IRIS_313-10803	-238.944	35.4073	73.1586	0.997249	0.002751	japonica	non-glutinous	0	Indonesia	Indonesia	T	SER	GJ-trp
1548	IRIS_313-10840	-300.349	53.1357	-187.438	0.997252	0.002748	japonica	non-glutinous	4056324	Korea, Republic of	Korea, Republic of	T	EAR	GJ-tmp
1549	IRIS_313-10841	-244.308	39.8703	78.8825	0.997312	0.002688	japonica	glutinous	4055163	Indonesia	Indonesia	T	SER	GJ-trp
1550	IRIS_313-10842	133.103	51.3135	48.3048	0.997313	0.002687	indica	non-glutinous	4055162	Indonesia	Indonesia	T	SER	XI-3
1551	IRIS_313-10844	131.882	59.1976	46.3839	0.997317	0.002683	indica	non-glutinous	4055161	Indonesia	Indonesia	I	SER	XI-3
1552	IRIS_313-10845	9.33703	-293.294	1.85442	0.997347	0.002653	indica	non-glutinous	4055160	India	India	0	SAC	cA (Aus)
1553	IRIS_313-10847	146.768	40.5508	-14.1259	0.997384	0.002616	indica	non-glutinous	4055159	India	India	0	SAC	XI-adm
1554	IRIS_313-10848	-254.339	22.9593	-14.6025	0.99744	0.00256	japonica	non-glutinous	4056321	India	India	0	SAC	GJ-sbtrp
1555	IRIS_313-10849	-6.28107	-322.89	12.6253	0.997521	0.002479	japonica	non-glutinous	4056320	India	India	0	SAC	cA (Aus)
1556	IRIS_313-10804	126.41	57.9864	32.8151	0.99755	0.00245	indica	non-glutinous	4494455	Indonesia	Indonesia	T	SER	XI-3
1557	IRIS_313-10850	-119.449	-18.3604	25.7381	0.997552	0.002448	japonica	non-glutinous	4055158	India	India	0	SAC	admix
1558	IRIS_313-10851	-162.052	-36.8478	-7.66964	0.997577	0.002423	japonica	non-glutinous	4056319	India	India	0	SAC	cB (Bas)
1559	IRIS_313-10852	-32.5662	-344.368	2.09431	0.997604	0.002396	japonica	non-glutinous	4056318	India	India	0	SAC	cA (Aus)
1560	IRIS_313-10853	-275.957	44.6914	35.7391	0.99762	0.00238	japonica	non-glutinous	4055157	India	India	0	SAC	GJ-adm
1561	IRIS_313-10854	-9.47264	-244.851	7.50526	0.997694	0.002306	japonica	non-glutinous	4056317	India	India	0	SAC	cA (Aus)
1562	IRIS_313-10855	134.886	10.7546	2.20672	0.997704	0.002296	indica	glutinous	4112058	India	India	0	SAC	XI-2
1563	IRIS_313-10856	66.5187	-102.76	-6.25175	0.997756	0.002244	indica	non-glutinous	4056316	India	India	0	SAC	admix
1564	IRIS_313-10857	58.7306	-85.8287	-19.9796	0.997759	0.002241	indica	non-glutinous	4056315	India	India	0	SAC	admix
1565	IRIS_313-10858	111.805	-6.35061	-6.64643	0.997804	0.002196	indica	non-glutinous	4056314	India	India	0	SAC	XI-adm
1566	IRIS_313-10859	79.0096	-64.9436	-13.8195	0.997807	0.002193	indica	non-glutinous	4055156	India	India	0	SAC	XI-adm
1567	IRIS_313-10805	-243.865	39.2151	83.9386	0.997822	0.002178	japonica	glutinous	4056337	Indonesia	Indonesia	T	SER	GJ-trp
1568	IRIS_313-10861	-20.313	-258.53	6.85697	0.997822	0.002178	japonica	non-glutinous	4056313	India	India	0	SAC	cA (Aus)
1569	IRIS_313-10862	-272.256	42.7738	34.9179	0.997826	0.002174	japonica	non-glutinous	4056312	India	India	0	SAC	GJ-adm
1570	IRIS_313-10863	151.302	23.1588	-17.6258	0.997827	0.002173	indica	non-glutinous	4055154	India	India	0	SAC	XI-2
1571	IRIS_313-10864	-223.754	-5.33952	13.951	0.997873	0.002127	japonica	non-glutinous	4056311	India	India	0	SAC	admix
1572	IRIS_313-10865	-265.207	34.6103	-6.61836	0.997899	0.002101	japonica	non-glutinous	4055153	India	India	0	SAC	GJ-sbtrp
1573	IRIS_313-10866	-268.331	35.5971	-1.97378	0.9979	0.0021	japonica	non-glutinous	4056310	India	India	0	SAC	GJ-sbtrp
1574	IRIS_313-10867	-263.702	40.5907	0.832096	0.997915	0.002085	japonica	non-glutinous	4056309	India	India	0	SAC	GJ-sbtrp
1575	IRIS_313-10868	-166.374	-64.8527	-3.42229	0.997933	0.002067	japonica	non-glutinous	4055152	India	India	0	SAC	cB (Bas)
1576	IRIS_313-10869	-23.0099	-285.57	3.7101	0.997972	0.002028	japonica	non-glutinous	4056308	India	India	0	SAC	cA (Aus)
1577	IRIS_313-10806	130.574	53.7625	29.0573	0.99798	0.00202	indica	non-glutinous	4494456	Indonesia	Indonesia	T	SER	XI-3
1578	IRIS_313-10870	-271.602	39.037	19.743	0.997983	0.002017	japonica	non-glutinous	4056307	India	India	0	SAC	GJ-sbtrp
1579	IRIS_313-10871	-32.8353	-268.615	3.04512	0.997987	0.002013	japonica	non-glutinous	4056306	India	India	0	SAC	cA (Aus)
1580	IRIS_313-10872	-202.636	49.0141	-4.02549	0.998048	0.001952	japonica	non-glutinous	4112004	India	India	0	SAC	GJ-adm
1581	IRIS_313-10873	-49.9953	-227.771	-2.30072	0.998052	0.001948	japonica	glutinous	4056305	India	India	0	SAC	cA (Aus)
1582	IRIS_313-10874	-268.009	39.5024	6.56119	0.998091	0.001909	japonica	glutinous	4112057	India	India	0	SAC	GJ-sbtrp
1583	IRIS_313-10875	-23.8259	-318.71	6.36188	0.998101	0.001899	japonica	non-glutinous	4056304	India	India	0	SAC	cA (Aus)
1584	IRIS_313-10876	-28.0655	-260.796	0.0502172	0.998101	0.001899	japonica	non-glutinous	4056303	India	India	0	SAC	cA (Aus)
1585	IRIS_313-10877	-23.898	-256.899	-2.37749	0.998112	0.001888	japonica	non-glutinous	4056302	India	India	0	SAC	cA (Aus)
1586	IRIS_313-10878	-24.8386	-257.972	-2.64101	0.998146	0.001854	japonica	non-glutinous	4056301	India	India	0	SAC	cA (Aus)
1587	IRIS_313-10879	38.6991	-146.227	2.58057	0.998185	0.001815	indica	non-glutinous	4056300	India	India	0	SAC	admix
1588	IRIS_313-10807	129.964	64.913	46.584	0.998186	0.001814	indica	non-glutinous	0	Indonesia	Indonesia	T	SER	XI-3
1589	IRIS_313-10880	149.547	26.3735	-10.0273	0.99819	0.00181	indica	non-glutinous	4055151	India	India	0	SAC	XI-2
1590	IRIS_313-10881	-114.296	-78.91	1.1169	0.998191	0.001809	japonica	non-glutinous	4056299	India	India	0	SAC	admix
1591	IRIS_313-10882	-7.47658	-230.082	2.30156	0.998192	0.001808	japonica	non-glutinous	4056298	India	India	0	SAC	cA (Aus)
1592	IRIS_313-10883	-129.655	-72.9634	6.31747	0.998202	0.001798	japonica	non-glutinous	4056297	India	India	0	SAC	admix
1593	IRIS_313-10884	-245.143	33.5187	-2.05809	0.998239	0.001761	japonica	non-glutinous	4056296	India	India	0	SAC	GJ-sbtrp
1594	IRIS_313-10885	140.651	31.6664	11.591	0.998341	0.001659	indica	non-glutinous	4055150	India	India	0	SAC	XI-adm
1595	IRIS_313-10886	-267.964	40.0149	-3.72339	0.998358	0.001642	japonica	non-glutinous	4055149	India	India	0	SAC	GJ-sbtrp
1596	IRIS_313-10887	140.094	45.2348	-0.505177	0.998372	0.001628	indica	non-glutinous	4056295	India	India	0	SAC	XI-adm
1597	IRIS_313-10888	-267.562	42.5073	11.1589	0.998385	0.001615	japonica	non-glutinous	4055148	India	India	0	SAC	GJ-sbtrp
1598	IRIS_313-10889	-274.409	37.8783	2.41976	0.998473	0.001527	japonica	non-glutinous	0	India	India	0	SAC	GJ-sbtrp
1599	IRIS_313-10808	-241.004	39.0609	87.1561	0.998552	0.001448	japonica	non-glutinous	4055176	Indonesia	Indonesia	T	SER	GJ-trp
1600	IRIS_313-10890	-272.456	37.6437	-8.22246	0.998598	0.001402	japonica	non-glutinous	0	India	India	0	SAC	GJ-sbtrp
1601	IRIS_313-10891	4.50878	-203.053	-0.815706	0.998602	0.001398	indica	non-glutinous	4056294	India	India	0	SAC	cA (Aus)
1602	IRIS_313-10892	-13.8887	-214.105	-10.3273	0.998612	0.001388	japonica	glutinous	4056293	India	India	0	SAC	cA (Aus)
1603	IRIS_313-10893	-269.072	36.1385	1.95574	0.998666	0.001334	japonica	non-glutinous	4056292	India	India	0	SAC	GJ-sbtrp
1604	IRIS_313-10809	-215.514	41.7167	57.9537	0.998684	0.001316	japonica	non-glutinous	4055175	Indonesia	Indonesia	T	SER	GJ-trp
1605	IRIS_313-10903	140.314	41.0216	15.0773	0.998688	0.001312	indica	non-glutinous	4494460	Cambodia	Cambodia	T	SEA	XI-3
1606	IRIS_313-10904	135.906	52.6135	14.7437	0.998712	0.001288	indica	non-glutinous	4055142	Cambodia	Cambodia	T	SEA	XI-3
1607	IRIS_313-10905	129.257	49.2905	33.0778	0.998726	0.001274	indica	non-glutinous	0	Cambodia	Cambodia	T	SEA	XI-3
1608	IRIS_313-10906	125.545	51.3867	30.0183	0.998753	0.001247	indica	non-glutinous	0	Cambodia	Cambodia	T	SEA	XI-3
1609	IRIS_313-10907	137.153	49.8934	13.0308	0.998764	0.001236	indica	non-glutinous	4055141	Cambodia	Cambodia	T	SEA	XI-3
1610	IRIS_313-10908	134.882	46.0175	25.8262	0.998791	0.001209	indica	non-glutinous	4055140	Cambodia	Cambodia	T	SEA	XI-3
1611	IRIS_313-10910	144.402	56.2615	26.4245	0.998808	0.001192	indica	non-glutinous	4494462	Cambodia	Cambodia	T	SEA	XI-3
1612	IRIS_313-10911	142.607	52.8492	24.5665	0.998815	0.001185	indica	non-glutinous	0	Cambodia	Cambodia	0	SEA	XI-3
1613	IRIS_313-10912	135.179	56.6147	38.2998	0.998847	0.001153	indica	non-glutinous	4055139	Cambodia	Cambodia	T	SEA	XI-3
1614	IRIS_313-10894	5.66688	-152.884	-2.83614	0.998888	0.001112	indica	non-glutinous	4056291	India	India	0	SAC	admix
1615	IRIS_313-10913	140.944	45.1335	14.7227	0.99889	0.00111	indica	non-glutinous	0	Cambodia	Cambodia	T	SEA	XI-3
1616	IRIS_313-10915	149.069	59.6206	26.8104	0.998892	0.001108	indica	non-glutinous	4055138	Cambodia	Cambodia	T	SEA	XI-3
1617	IRIS_313-10917	127.869	24.6992	-30.7475	0.998901	0.001099	indica	non-glutinous	4056287	Philippines	Philippines	T	SER	XI-adm
1618	IRIS_313-10918	-224.775	47.2821	95.3511	0.998936	0.001064	japonica	non-glutinous	4494463	Philippines	Philippines	T	SER	GJ-trp
1619	IRIS_313-10919	-247.055	42.4361	88.1313	0.998947	0.001053	japonica	non-glutinous	4056286	Philippines	Philippines	T	SER	GJ-trp
1620	IRIS_313-10920	-244.649	42.2756	87.9415	0.998957	0.001043	japonica	non-glutinous	4056285	Philippines	Philippines	T	SER	GJ-trp
1621	IRIS_313-10921	127.883	26.5887	1.8978	0.998974	0.001026	indica	glutinous	4112003	Lao People's Democratic Republic	Lao People's Democratic Republic	0	SEA	XI-adm
1622	IRIS_313-10922	-271.468	44.5865	-18.9241	0.998982	0.001018	japonica	glutinous	4055136	Lao People's Democratic Republic	Lao People's Democratic Republic	0	SEA	GJ-sbtrp
1623	IRIS_313-10895	-276.047	41.8946	15.5504	0.998996	0.001004	japonica	non-glutinous	4056290	India	India	0	SAC	GJ-sbtrp
1624	IRIS_313-10923	-274.521	45.9285	-32.4482	0.999017	0.000983	japonica	non-glutinous	4056284	Thailand	Thailand	T	SEA	GJ-sbtrp
1625	IRIS_313-10924	148.916	54.2741	-7.84556	0.999047	0.000953	indica	non-glutinous	4056283	Nepal	Nepal	T	SAC	XI-adm
1626	IRIS_313-10925	-13.892	-314.577	7.37899	0.999095	0.000905	japonica	non-glutinous	4056282	Nepal	Nepal	T	SAC	cA (Aus)
1627	IRIS_313-10926	-152.234	-63.4766	-7.71869	0.999105	0.000895	japonica	non-glutinous	4056281	Nepal	Nepal	T	SAC	cB (Bas)
1628	IRIS_313-10927	2.26945	-317.552	0.987917	0.999105	0.000895	indica	non-glutinous	4056280	Nepal	Nepal	T	SAC	cA (Aus)
1629	IRIS_313-10928	130.404	31.5393	5.88413	0.999106	0.000894	indica	glutinous	4056279	Thailand	Thailand	T	SEA	XI-3
1630	IRIS_313-10929	138.296	19.2633	-2.96081	0.999193	0.000807	indica	non-glutinous	4055135	India	India	0	SAC	XI-2
1631	IRIS_313-10930	-19.4939	-348.09	7.37302	0.999199	0.000801	japonica	non-glutinous	4056278	Bangladesh	Bangladesh	P	SAE	cA (Aus)
1632	IRIS_313-10931	-284.493	47.2914	91.6402	0.999218	0.000782	japonica	non-glutinous	4056277	Philippines	Philippines	T	SER	GJ-trp
1633	IRIS_313-10932	132.718	38.4139	-72.5682	0.999246	0.000754	indica	non-glutinous	4055134	China	China	P	EAS	XI-1A
1634	IRIS_313-10896	9.92178	-129.099	-5.3965	0.999269	0.000731	indica	non-glutinous	4055147	India	India	0	SAC	admix
1635	IRIS_313-10933	-181.55	-42.7806	1.67146	0.999329	0.000671	japonica	non-glutinous	4055133	India	India	0	SAC	cB (Bas)
1636	IRIS_313-10934	139.042	53.5785	14.5383	0.999393	0.000607	indica	non-glutinous	4055132	Thailand	Thailand	0	SEA	XI-3
1637	IRIS_313-10935	132.167	56.4617	33.6825	0.999396	0.000604	indica	non-glutinous	4056276	Indonesia	Indonesia	0	SER	XI-3
1638	IRIS_313-10936	-243.012	34.8872	78.1852	0.999431	0.000569	japonica	non-glutinous	4056275	Indonesia	Indonesia	0	SER	GJ-trp
1639	IRIS_313-10937	130.226	56.9431	48.3092	0.999434	0.000566	indica	glutinous	4494464	Indonesia	Indonesia	T	SER	XI-3
1640	IRIS_313-10938	134.725	61.7735	48.7963	0.999468	0.000532	indica	non-glutinous	4055131	Indonesia	Indonesia	T	SER	XI-3
1641	IRIS_313-10940	136.3	55.1756	45.2175	0.999512	0.000488	indica	non-glutinous	4056273	Indonesia	Indonesia	T	SER	XI-3
1642	IRIS_313-10941	145.286	53.9315	33.4951	0.999516	0.000484	indica	non-glutinous	4056272	Indonesia	Indonesia	0	SER	XI-adm
1643	IRIS_313-10942	135.859	53.2779	33.6845	0.999516	0.000484	indica	non-glutinous	4055130	Indonesia	Indonesia	T	SER	XI-3
1644	IRIS_313-10897	137.178	57.1371	33.8346	0.999542	0.000458	indica	non-glutinous	4056289	India	India	0	SAC	XI-3
1645	IRIS_313-10943	126.63	56.1043	55.0575	0.999547	0.000453	indica	non-glutinous	4055129	Indonesia	Indonesia	T	SER	XI-3
1646	IRIS_313-10944	121.147	22.3188	21.5009	0.999662	0.000338	indica	non-glutinous	4055128	Indonesia	Indonesia	T	SER	XI-3
1647	IRIS_313-10945	-262.737	50.6868	110.087	0.99967	0.00033	japonica	non-glutinous	4056271	Indonesia	Indonesia	0	SER	GJ-trp
1648	IRIS_313-10946	-257.969	45.1479	92.5159	0.999692	0.000308	japonica	non-glutinous	4056270	Indonesia	Indonesia	0	SER	GJ-trp
1649	IRIS_313-10947	114.088	48.6197	26.7475	0.999713	0.000287	indica	non-glutinous	4056269	Indonesia	Indonesia	0	SER	XI-3
1650	IRIS_313-10948	-88.2654	59.5426	64.6961	0.999714	0.000286	japonica	non-glutinous	4112002	Indonesia	Indonesia	0	SER	admix
1651	IRIS_313-10949	-267.304	46.8376	105.422	0.99974	0.00026	japonica	non-glutinous	4056268	Indonesia	Indonesia	0	SER	GJ-trp
1652	IRIS_313-10950	-234.025	35.0164	75.1208	0.999749	0.000251	japonica	glutinous	4056267	Indonesia	Indonesia	T	SER	GJ-trp
1653	IRIS_313-10951	134.48	65.3478	45.1154	0.999758	0.000242	indica	non-glutinous	4055127	Indonesia	Indonesia	T	SER	XI-3
1654	IRIS_313-10952	-264.593	39.0318	100.168	0.999817	0.000183	japonica	non-glutinous	4056266	Indonesia	Indonesia	T	SER	GJ-trp
1655	IRIS_313-10898	143.713	50.6313	16.3257	0.999821	0.000179	indica	non-glutinous	4055146	Cambodia	Cambodia	T	SEA	XI-3
1656	IRIS_313-10953	-266.483	40.7115	97.2963	0.999833	0.000167	japonica	non-glutinous	4056265	Indonesia	Indonesia	T	SER	GJ-trp
1657	IRIS_313-10954	144.078	70.2954	33.6045	0.9999	0.0001	indica	non-glutinous	4056264	Indonesia	Indonesia	T	SER	XI-3
1658	IRIS_313-10955	129.597	53.3802	46.8104	0.999916	8.4e-05	indica	non-glutinous	4056263	Indonesia	Indonesia	T	SER	XI-3
1659	IRIS_313-10956	-236.61	35.7463	82.1477	0.999923	7.7e-05	japonica	glutinous	4055126	Indonesia	Indonesia	T	SER	GJ-trp
1660	IRIS_313-10957	-260.391	43.3748	108.286	0.999984	1.6e-05	japonica	non-glutinous	4056262	Indonesia	Indonesia	T	SER	GJ-trp
1661	IRIS_313-10958	-262.239	41.922	103.065	0.999987	1.3e-05	japonica	non-glutinous	4056261	Indonesia	Indonesia	T	SER	GJ-trp
1662	IRIS_313-10959	-263.279	46.9248	95.1174	0.99999	1e-05	japonica	non-glutinous	4056260	Indonesia	Indonesia	T	SER	GJ-trp
1663	IRIS_313-10960	-256.926	44.2466	101.82	0.99999	1e-05	japonica	non-glutinous	4056259	Indonesia	Indonesia	T	SER	GJ-trp
1664	IRIS_313-10961	132.387	58.598	49.9245	0.99999	1e-05	indica	non-glutinous	4055125	Indonesia	Indonesia	T	SER	XI-3
1665	IRIS_313-10962	127.101	57.0629	49.7728	0.99999	1e-05	indica	non-glutinous	4055124	Indonesia	Indonesia	T	SER	XI-3
1666	IRIS_313-10899	140.464	49.9374	29.8467	0.99999	1e-05	indica	non-glutinous	4055145	Cambodia	Cambodia	T	SEA	XI-3
1667	IRIS_313-10963	-7.60802	-331.756	7.84378	0.99999	1e-05	japonica	non-glutinous	4056258	Bangladesh	Bangladesh	T	SAE	cA (Aus)
1668	IRIS_313-10964	-8.20556	-328.019	11.9696	0.99999	1e-05	japonica	non-glutinous	4056257	Bangladesh	Bangladesh	T	SAE	cA (Aus)
1669	IRIS_313-10965	-6.69525	-337.679	5.32719	0.99999	1e-05	japonica	non-glutinous	4056256	Bangladesh	Bangladesh	T	SAE	cA (Aus)
1670	IRIS_313-10966	134.685	41.2758	-17.144	0.99999	1e-05	indica	non-glutinous	4056255	Brazil	Brazil	0	SAM	XI-adm
1671	IRIS_313-10967	-294.267	54.9085	-109.513	0.99999	1e-05	japonica	non-glutinous	4056254	Brazil	Brazil	0	SAM	GJ-tmp
1672	IRIS_313-10968	127.798	33.4689	-78.5261	0.99999	1e-05	indica	non-glutinous	4056253	Brazil	Brazil	0	SAM	XI-1A
1673	IRIS_313-10969	-10.2559	-344.634	6.05271	0.99999	1e-05	japonica	non-glutinous	4056252	Brazil	Brazil	0	SAM	cA (Aus)
1674	IRIS_313-10970	134.095	56.1825	32.0556	0.99999	1e-05	indica	non-glutinous	0	Viet Nam	Viet Nam	T	SEA	XI-3
1675	IRIS_313-10971	127.757	9.53016	-12.1331	0.99999	1e-05	indica	non-glutinous	4055123	Bangladesh	Bangladesh	T	SAE	XI-2
1676	IRIS_313-10972	117.371	8.08577	0.530519	0.99999	1e-05	indica	non-glutinous	4055122	Bangladesh	Bangladesh	T	SAE	XI-2
1677	IRIS_313-10900	142.911	54.5012	29.3859	0.99999	1e-05	indica	glutinous	4112023	Cambodia	Cambodia	T	SEA	XI-3
1678	IRIS_313-10973	122.406	7.43485	-9.18452	0.99999	1e-05	indica	non-glutinous	4055121	Bangladesh	Bangladesh	T	SAE	XI-2
1679	IRIS_313-10974	125.099	13.6216	0.716216	0.99999	1e-05	indica	non-glutinous	4055120	Bangladesh	Bangladesh	T	SAE	XI-2
1680	IRIS_313-10975	136.719	34.3802	2.36192	0.99999	1e-05	indica	non-glutinous	4055119	Bangladesh	Bangladesh	T	SAE	XI-2
1681	IRIS_313-10976	-8.95813	-344.495	11.6813	0.99999	1e-05	japonica	non-glutinous	4112056	Bangladesh	Bangladesh	T	SAE	cA (Aus)
1682	IRIS_313-10977	124.68	3.42948	-15.4633	0.99999	1e-05	indica	non-glutinous	4055118	Bangladesh	Bangladesh	T	SAE	XI-2
1683	IRIS_313-10978	121.398	-18.0752	-1.51206	0.99999	1e-05	indica	non-glutinous	4056251	Bangladesh	Bangladesh	T	SAE	XI-adm
1684	IRIS_313-10979	11.1658	-268.826	2.48432	0.99999	1e-05	indica	non-glutinous	0	Bangladesh	Bangladesh	T	SAE	cA (Aus)
1685	IRIS_313-10980	80.113	-131.976	-3.81639	0.99999	1e-05	indica	non-glutinous	4056250	Bangladesh	Bangladesh	T	SAE	admix
1686	IRIS_313-10981	3.55829	-282.605	1.78485	0.99999	1e-05	indica	non-glutinous	4056249	Bangladesh	Bangladesh	T	SAE	cA (Aus)
1687	IRIS_313-10982	128.855	8.8596	4.80101	0.99999	1e-05	indica	non-glutinous	4055117	Bangladesh	Bangladesh	T	SAE	XI-2
1688	IRIS_313-10901	146.258	53.2596	26.936	0.99999	1e-05	indica	glutinous	4055144	Cambodia	Cambodia	T	SEA	XI-3
1689	IRIS_313-10983	132.646	33.381	-7.74027	0.99999	1e-05	indica	non-glutinous	4055116	Bangladesh	Bangladesh	T	SAE	XI-adm
1690	IRIS_313-10984	140.103	9.26385	4.96246	0.99999	1e-05	indica	non-glutinous	4055115	Bangladesh	Bangladesh	T	SAE	XI-2
1691	IRIS_313-10985	135.885	13.4579	5.90434	0.99999	1e-05	indica	non-glutinous	4112001	Bangladesh	Bangladesh	T	SAE	XI-2
1692	IRIS_313-10986	140.41	10.2011	-9.46448	0.99999	1e-05	indica	non-glutinous	4055114	Bangladesh	Bangladesh	T	SAE	XI-2
1693	IRIS_313-10902	143.721	60.7648	31.7964	0.99999	1e-05	indica	non-glutinous	4055143	Cambodia	Cambodia	0	SEA	XI-3
1694	IRIS_313-10996	117.475	47.2174	49.9886	0.99999	1e-05	indica	non-glutinous	4056245	Indonesia	Indonesia	T	SER	XI-adm
1695	IRIS_313-10997	134.407	61.0496	47.4466	0.99999	1e-05	indica	non-glutinous	4056244	Indonesia	Indonesia	T	SER	XI-3
1696	IRIS_313-10998	20.205	47.1931	63.5916	0.99999	1e-05	indica	non-glutinous	0	Indonesia	Indonesia	T	SER	XI-adm
1697	IRIS_313-10999	-273.14	54.4392	120.163	0.99999	1e-05	japonica	non-glutinous	4056243	Indonesia	Indonesia	T	SER	GJ-trp
1698	IRIS_313-11000	127.134	47.8649	35.1862	0.99999	1e-05	indica	non-glutinous	4056242	Indonesia	Indonesia	T	SER	XI-3
1699	IRIS_313-11001	-272.496	46.7789	89.7541	0.99999	1e-05	japonica	glutinous	4056241	Indonesia	Indonesia	T	SER	GJ-trp
1700	IRIS_313-11003	-240.176	45.0899	93.0628	0.99999	1e-05	japonica	non-glutinous	4056239	Indonesia	Indonesia	T	SER	GJ-trp
1701	IRIS_313-11004	-257.195	46.7986	109.807	0.99999	1e-05	japonica	non-glutinous	4056238	Indonesia	Indonesia	T	SER	GJ-trp
1702	IRIS_313-11005	-236.503	32.457	74.5424	0.99999	1e-05	japonica	glutinous	4055110	Indonesia	Indonesia	T	SER	GJ-trp
1703	IRIS_313-10987	5.36185	-286.717	1.97194	0.99999	1e-05	indica	non-glutinous	4055113	Bangladesh	Bangladesh	T	SAE	cA (Aus)
1704	IRIS_313-11006	131.657	57.9253	34.6961	0.99999	1e-05	indica	non-glutinous	4056237	Indonesia	Indonesia	T	SER	XI-3
1705	IRIS_313-11007	-242.28	37.9197	83.3631	0.99999	1e-05	japonica	non-glutinous	4055109	Indonesia	Indonesia	T	SER	GJ-trp
1706	IRIS_313-11008	-257.614	47.7655	82.2299	0.99999	1e-05	japonica	non-glutinous	4055108	Indonesia	Indonesia	T	SER	GJ-trp
1707	IRIS_313-11009	-271.174	48.4595	104.36	0.99999	1e-05	japonica	non-glutinous	4056236	Indonesia	Indonesia	T	SER	GJ-trp
1708	IRIS_313-11010	133.25	61.9468	32.1395	0.99999	1e-05	indica	non-glutinous	4056235	Indonesia	Indonesia	T	SER	XI-3
1709	IRIS_313-11011	122.571	40.7443	-8.99295	0.99999	1e-05	indica	non-glutinous	4056234	Indonesia	Indonesia	T	SER	XI-adm
1710	IRIS_313-11012	-75.8452	39.809	70.2899	0.99999	1e-05	japonica	non-glutinous	4056233	Indonesia	Indonesia	T	SER	admix
1711	IRIS_313-11013	-6.01711	-345.485	5.93106	0.99999	1e-05	japonica	non-glutinous	4056232	Bangladesh	Bangladesh	T	SAE	cA (Aus)
1712	IRIS_313-11014	-13.1942	-337.144	8.5021	0.99999	1e-05	japonica	non-glutinous	4056231	Bangladesh	Bangladesh	T	SAE	cA (Aus)
1713	IRIS_313-11015	-12.4285	-339.302	4.03225	0.99999	1e-05	japonica	non-glutinous	4055107	Bangladesh	Bangladesh	T	SAE	cA (Aus)
1714	IRIS_313-10988	93.5883	43.3759	-3.19195	0.99999	1e-05	indica	non-glutinous	4112000	India	India	P	SAC	XI-adm
1715	IRIS_313-11016	-12.7864	-350.598	5.49061	0.99999	1e-05	japonica	non-glutinous	4056230	Bangladesh	Bangladesh	T	SAE	cA (Aus)
1716	IRIS_313-11017	-4.5963	-345.854	10.0032	0.99999	1e-05	japonica	non-glutinous	4056229	Bangladesh	Bangladesh	T	SAE	cA (Aus)
1717	IRIS_313-11018	9.12107	-337.985	7.41599	0.99999	1e-05	indica	non-glutinous	4056228	Bangladesh	Bangladesh	T	SAE	cA (Aus)
1718	IRIS_313-11019	-6.36824	-331.571	6.74207	0.99999	1e-05	japonica	non-glutinous	4056227	Bangladesh	Bangladesh	T	SAE	cA (Aus)
1719	IRIS_313-11020	-16.8694	-314.359	6.24567	0.99999	1e-05	japonica	non-glutinous	4056226	Pakistan	Pakistan	T	SAW	cA (Aus)
1720	IRIS_313-11021	-152.708	-116.641	7.59904	0.99999	1e-05	japonica	non-glutinous	4056225	Pakistan	Pakistan	0	SAW	cB (Bas)
1721	IRIS_313-11022	-142.882	-104.922	5.84546	0.99999	1e-05	japonica	non-glutinous	4494466	Pakistan	Pakistan	T	SAW	cB (Bas)
1722	IRIS_313-11023	-150.981	-116.826	7.89832	0.99999	1e-05	japonica	non-glutinous	4056224	Pakistan	Pakistan	T	SAW	cB (Bas)
1723	IRIS_313-11024	-19.5586	-326.799	3.8694	0.99999	1e-05	japonica	non-glutinous	4056223	Pakistan	Pakistan	T	SAW	cA (Aus)
1724	IRIS_313-11025	-23.0293	-334.063	1.94606	0.99999	1e-05	japonica	non-glutinous	4055106	Pakistan	Pakistan	T	SAW	cA (Aus)
1725	IRIS_313-10989	149.564	29.0232	3.22838	0.99999	1e-05	indica	non-glutinous	4055112	India	India	P	SAC	XI-2
1726	IRIS_313-11026	-162.387	-75.466	2.88333	0.99999	1e-05	japonica	non-glutinous	4112021	Pakistan	Pakistan	T	SAW	cB (Bas)
1727	IRIS_313-11027	-12.514	-268.182	6.5309	0.99999	1e-05	japonica	non-glutinous	4056222	Pakistan	Pakistan	T	SAW	cA (Aus)
1728	IRIS_313-11028	-8.97596	-309.13	-3.19549	0.99999	1e-05	japonica	non-glutinous	4056221	Pakistan	Pakistan	0	SAW	cA (Aus)
1729	IRIS_313-11029	-4.45413	-317.574	1.72748	0.99999	1e-05	japonica	non-glutinous	4056220	Pakistan	Pakistan	T	SAW	cA (Aus)
1730	IRIS_313-11030	-122.674	-148.004	2.2823	0.99999	1e-05	japonica	non-glutinous	0	Pakistan	Pakistan	T	SAW	cB (Bas)
1731	IRIS_313-11031	20.5147	-235.713	-10.6995	0.99999	1e-05	indica	non-glutinous	4056219	Pakistan	Pakistan	T	SAW	cA (Aus)
1732	IRIS_313-11032	-101.845	-125.376	-1.99009	0.99999	1e-05	japonica	non-glutinous	4056218	Pakistan	Pakistan	T	SAW	cB (Bas)
1733	IRIS_313-11033	-111.858	-189.4	-4.08913	0.99999	1e-05	japonica	non-glutinous	4056217	Pakistan	Pakistan	0	SAW	admix
1734	IRIS_313-11034	-15.0443	-298.253	2.6935	0.99999	1e-05	japonica	non-glutinous	4056216	Pakistan	Pakistan	0	SAW	cA (Aus)
1735	IRIS_313-11035	54.8748	-166.815	-4.5925	0.99999	1e-05	indica	non-glutinous	4056215	Pakistan	Pakistan	0	SAW	admix
1736	IRIS_313-10990	121.103	52.0435	2.42077	0.99999	1e-05	indica	non-glutinous	4056248	Philippines	Philippines	T	SER	XI-adm
1737	IRIS_313-11036	-44.3902	-251.777	2.09969	0.99999	1e-05	japonica	non-glutinous	4055105	Pakistan	Pakistan	T	SAW	cA (Aus)
1738	IRIS_313-11037	-19.3172	-330.367	6.86602	0.99999	1e-05	japonica	non-glutinous	4056214	Pakistan	Pakistan	T	SAW	cA (Aus)
1739	IRIS_313-11038	131.699	42.5687	-76.9478	0.99999	1e-05	indica	non-glutinous	4055104	China	China	P	EAS	XI-1A
1740	IRIS_313-11039	133.363	46.4266	-87.698	0.99999	1e-05	indica	non-glutinous	4055103	China	China	I	EAS	XI-1A
1741	IRIS_313-11040	124.092	7.99927	17.428	0.99999	1e-05	indica	non-glutinous	4055102	India	India	0	SAC	XI-adm
1742	IRIS_313-11041	121.938	-21.7151	-32.056	0.99999	1e-05	indica	non-glutinous	4056213	India	India	0	SAC	XI-2
1743	IRIS_313-11042	116.799	-16.2781	-3.93303	0.99999	1e-05	indica	non-glutinous	0	India	India	0	SAC	XI-adm
1744	IRIS_313-11043	130.7	66.9505	40.0977	0.99999	1e-05	indica	non-glutinous	0	Malaysia	Malaysia	0	SER	XI-3
1745	IRIS_313-11044	-247.567	35.4592	73.8172	0.99999	1e-05	japonica	non-glutinous	4055101	Malaysia	Malaysia	0	SER	GJ-trp
1746	IRIS_313-11045	-260.186	51.4402	105.588	0.99999	1e-05	japonica	non-glutinous	4055100	Malaysia	Malaysia	0	SER	GJ-trp
1747	IRIS_313-10991	-262.8	44.6988	113.905	0.99999	1e-05	japonica	non-glutinous	4056247	Philippines	Philippines	T	SER	GJ-trp
1748	IRIS_313-11046	-243.7	36.0168	81.8688	0.99999	1e-05	japonica	non-glutinous	4056212	Malaysia	Malaysia	0	SER	GJ-trp
1749	IRIS_313-11047	-25.9359	-344.131	2.56262	0.99999	1e-05	japonica	non-glutinous	4055099	Bangladesh	Bangladesh	P	SAE	cA (Aus)
1750	IRIS_313-11048	-11.4308	-353.016	8.26539	0.99999	1e-05	japonica	non-glutinous	4056211	Bangladesh	Bangladesh	P	SAE	cA (Aus)
1751	IRIS_313-11049	-15.3877	-347.286	8.41477	0.99999	1e-05	japonica	non-glutinous	4056210	Bangladesh	Bangladesh	P	SAE	cA (Aus)
1752	IRIS_313-11050	-15.1337	-346.483	1.16764	0.99999	1e-05	japonica	non-glutinous	4056209	Bangladesh	Bangladesh	P	SAE	cA (Aus)
1753	IRIS_313-11051	-19.4611	-331.958	8.55306	0.99999	1e-05	japonica	non-glutinous	4056208	Bangladesh	Bangladesh	P	SAE	cA (Aus)
1754	IRIS_313-11052	-19.6357	-307.097	4.37815	0.99999	1e-05	japonica	non-glutinous	4056207	Bangladesh	Bangladesh	P	SAE	cA (Aus)
1755	IRIS_313-11053	-16.3689	-354.703	1.02903	0.99999	1e-05	japonica	non-glutinous	4056206	Bangladesh	Bangladesh	P	SAE	cA (Aus)
1756	IRIS_313-11054	-17.3194	-330.772	11.458	0.99999	1e-05	japonica	non-glutinous	4056205	Bangladesh	Bangladesh	P	SAE	cA (Aus)
1757	IRIS_313-11055	-13.2533	-346.206	3.12471	0.99999	1e-05	japonica	non-glutinous	4056204	Bangladesh	Bangladesh	P	SAE	cA (Aus)
1758	IRIS_313-10992	-264.468	46.0033	104.322	0.99999	1e-05	japonica	non-glutinous	4056246	Philippines	Philippines	T	SER	GJ-trp
1759	IRIS_313-11056	-10.33	-347.898	4.51303	0.99999	1e-05	japonica	non-glutinous	4056203	Bangladesh	Bangladesh	P	SAE	cA (Aus)
1760	IRIS_313-11057	-17.8306	-332.644	11.2381	0.99999	1e-05	japonica	non-glutinous	4056202	Bangladesh	Bangladesh	P	SAE	cA (Aus)
1761	IRIS_313-11058	-16.1438	-366.29	-0.270284	0.99999	1e-05	japonica	non-glutinous	4056201	Bangladesh	Bangladesh	P	SAE	cA (Aus)
1762	IRIS_313-11059	-12.977	-355.007	3.02788	0.99999	1e-05	japonica	non-glutinous	4056200	Bangladesh	Bangladesh	P	SAE	cA (Aus)
1763	IRIS_313-11060	-11.7436	-343.162	7.65034	0.99999	1e-05	japonica	non-glutinous	4112055	Bangladesh	Bangladesh	P	SAE	cA (Aus)
1764	IRIS_313-11061	-13.9429	-330.403	3.99858	0.99999	1e-05	japonica	non-glutinous	4056199	Bangladesh	Bangladesh	P	SAE	cA (Aus)
1765	IRIS_313-11062	-182.134	-80.643	24.6542	0.99999	1e-05	japonica	non-glutinous	4056198	Bangladesh	Bangladesh	P	SAE	cB (Bas)
1766	IRIS_313-11063	-27.8807	-317.632	4.93328	0.99999	1e-05	japonica	non-glutinous	4494467	Bangladesh	Bangladesh	P	SAE	cA (Aus)
1767	IRIS_313-11064	-30.8732	-323.18	4.49074	0.99999	1e-05	japonica	non-glutinous	4055098	Bangladesh	Bangladesh	P	SAE	cA (Aus)
1768	IRIS_313-11065	-24.8067	-310.337	4.52187	0.99999	1e-05	japonica	non-glutinous	4112054	Bangladesh	Bangladesh	P	SAE	cA (Aus)
1769	IRIS_313-10993	-280.985	45.8271	88.628	0.99999	1e-05	japonica	non-glutinous	4112022	Philippines	Philippines	T	SER	GJ-trp
1770	IRIS_313-11066	-178.489	-86.5967	28.0553	0.99999	1e-05	japonica	non-glutinous	4056197	Bangladesh	Bangladesh	P	SAE	admix
1771	IRIS_313-11067	-30.9623	-324.415	4.93086	0.99999	1e-05	japonica	non-glutinous	4056196	Bangladesh	Bangladesh	P	SAE	cA (Aus)
1772	IRIS_313-11068	-186.535	-71.4725	25.0567	0.99999	1e-05	japonica	non-glutinous	4056195	Bangladesh	Bangladesh	P	SAE	cB (Bas)
1773	IRIS_313-11069	-175.301	-87.0885	24.6695	0.99999	1e-05	japonica	non-glutinous	4055097	Bangladesh	Bangladesh	P	SAE	cB (Bas)
1774	IRIS_313-11070	-173.777	-85.487	22.2373	0.99999	1e-05	japonica	non-glutinous	4056194	Bangladesh	Bangladesh	P	SAE	admix
1775	IRIS_313-11071	136.502	37.6395	-7.02276	0.99999	1e-05	indica	non-glutinous	4055096	Lao People's Democratic Republic	Lao People's Democratic Republic	T	SEA	XI-adm
1776	IRIS_313-11072	144.979	54.4544	20.3939	0.99999	1e-05	indica	non-glutinous	4055095	Lao People's Democratic Republic	Lao People's Democratic Republic	T	SEA	XI-3
1777	IRIS_313-11073	-274	45.3085	-55.6898	0.99999	1e-05	japonica	non-glutinous	4112073	Lao People's Democratic Republic	Lao People's Democratic Republic	T	SEA	GJ-sbtrp
1778	IRIS_313-11074	147.279	52.9151	14.2468	0.99999	1e-05	indica	non-glutinous	0	Lao People's Democratic Republic	Lao People's Democratic Republic	T	SEA	XI-3
1779	IRIS_313-11075	-264.886	39.5931	-57.6361	0.99999	1e-05	japonica	non-glutinous	4055094	Lao People's Democratic Republic	Lao People's Democratic Republic	T	SEA	GJ-adm
1780	IRIS_313-10994	-256.946	47.4571	90.6744	0.99999	1e-05	japonica	non-glutinous	4494465	Philippines	Philippines	T	SER	GJ-trp
1781	IRIS_313-11076	140.27	47.2412	2.91262	0.99999	1e-05	indica	glutinous	4055093	Lao People's Democratic Republic	Lao People's Democratic Republic	T	SEA	XI-3
1782	IRIS_313-11077	-277.977	42.3447	-21.3161	0.99999	1e-05	japonica	glutinous	4055092	Lao People's Democratic Republic	Lao People's Democratic Republic	T	SEA	GJ-sbtrp
1783	IRIS_313-11078	132.808	50.3658	3.5994	0.99999	1e-05	indica	non-glutinous	4112020	Lao People's Democratic Republic	Lao People's Democratic Republic	T	SEA	XI-adm
1784	IRIS_313-11079	144.07	64.1661	28.1375	0.99999	1e-05	indica	non-glutinous	4055091	Lao People's Democratic Republic	Lao People's Democratic Republic	T	SEA	XI-3
1785	IRIS_313-10995	137.522	51.767	16.9857	0.99999	1e-05	indica	non-glutinous	4055111	Indonesia	Indonesia	T	SER	XI-3
1786	IRIS_313-11089	147.104	53.4743	-0.972721	0.99999	1e-05	indica	non-glutinous	4056192	Cambodia	Cambodia	0	SEA	XI-3
1787	IRIS_313-11090	118.316	25.8242	11.7261	0.99999	1e-05	indica	non-glutinous	4055084	Lao People's Democratic Republic	Lao People's Democratic Republic	T	SEA	XI-3
1788	IRIS_313-11091	109.887	1.66245	8.97021	0.99999	1e-05	indica	non-glutinous	4056191	Lao People's Democratic Republic	Lao People's Democratic Republic	T	SEA	XI-adm
1789	IRIS_313-11092	-73.3379	27.2605	-5.18797	0.99999	1e-05	japonica	non-glutinous	4056190	Lao People's Democratic Republic	Lao People's Democratic Republic	T	SEA	admix
1790	IRIS_313-11093	-220.797	22.5015	-7.59455	0.99999	1e-05	japonica	glutinous	4055083	Lao People's Democratic Republic	Lao People's Democratic Republic	T	SEA	GJ-sbtrp
1791	IRIS_313-11094	-253.801	43.6922	2.26802	0.99999	1e-05	japonica	glutinous	4112072	Lao People's Democratic Republic	Lao People's Democratic Republic	T	SEA	GJ-sbtrp
1792	IRIS_313-11095	-3.64674	58.7182	1.77712	0.99999	1e-05	japonica	non-glutinous	4055082	Lao People's Democratic Republic	Lao People's Democratic Republic	T	SEA	XI-3
1793	IRIS_313-11096	118.152	26.8474	25.009	0.99999	1e-05	indica	non-glutinous	4494468	Viet Nam	Viet Nam	T	SEA	XI-3
1794	IRIS_313-11097	82.6669	43.1805	31.9709	0.99999	1e-05	indica	non-glutinous	4056189	Philippines	Philippines	T	SER	XI-adm
1795	IRIS_313-11098	121.302	63.7645	47.1922	0.99999	1e-05	indica	non-glutinous	4494469	Sierra Leone	Sierra Leone	0	WAF	XI-3
1796	IRIS_313-11080	123.745	23.748	5.14644	0.99999	1e-05	indica	non-glutinous	4056193	Lao People's Democratic Republic	Lao People's Democratic Republic	T	SEA	XI-3
1797	IRIS_313-11099	136.289	1.72965	2.52596	0.99999	1e-05	indica	non-glutinous	4055081	Sierra Leone	Sierra Leone	0	WAF	XI-2
1798	IRIS_313-11100	-236.201	34.3711	98.7112	0.99999	1e-05	japonica	non-glutinous	0	Liberia	Liberia	0	WAF	GJ-trp
1799	IRIS_313-11101	135.757	36.1667	12.9666	0.99999	1e-05	indica	non-glutinous	4055080	Liberia	Liberia	0	WAF	XI-adm
1800	IRIS_313-11102	-282.039	56.2211	123.012	0.99999	1e-05	japonica	non-glutinous	0	Liberia	Liberia	0	WAF	GJ-trp
1801	IRIS_313-11103	-295.893	53.5492	108.55	0.99999	1e-05	japonica	non-glutinous	4111999	Liberia	Liberia	0	WAF	GJ-trp
1802	IRIS_313-11104	-295.754	53.7729	109.071	0.99999	1e-05	japonica	non-glutinous	4056188	Liberia	Liberia	0	WAF	GJ-trp
1803	IRIS_313-11105	-228.663	28.2116	84.284	0.99999	1e-05	japonica	non-glutinous	4055079	Liberia	Liberia	0	WAF	GJ-trp
1804	IRIS_313-11106	-242.025	36.9442	94.4126	0.99999	1e-05	japonica	non-glutinous	4112019	Liberia	Liberia	0	WAF	GJ-trp
1805	IRIS_313-11107	-236.241	33.5972	99.9385	0.99999	1e-05	japonica	non-glutinous	4056187	Liberia	Liberia	0	WAF	GJ-trp
1806	IRIS_313-11108	116.843	27.674	39.4405	0.99999	1e-05	indica	non-glutinous	4056186	Liberia	Liberia	0	WAF	XI-3
1807	IRIS_313-11081	138.284	52.9288	20.1589	0.99999	1e-05	indica	non-glutinous	4055090	Lao People's Democratic Republic	Lao People's Democratic Republic	T	SEA	XI-3
1808	IRIS_313-11109	-267.478	40.5042	106.799	0.99999	1e-05	japonica	non-glutinous	4056185	Liberia	Liberia	0	WAF	GJ-trp
1809	IRIS_313-11110	86.4774	-51.715	-14.528	0.99999	1e-05	indica	non-glutinous	4055078	Sri Lanka	Sri Lanka	T	IOC	XI-2
1810	IRIS_313-11111	4.03603	-294.565	8.76197	0.99999	1e-05	indica	non-glutinous	4056184	Bangladesh	Bangladesh	T	SAE	cA (Aus)
1811	IRIS_313-11112	7.4728	-260.595	-0.623324	0.99999	1e-05	indica	non-glutinous	4056183	Bangladesh	Bangladesh	T	SAE	cA (Aus)
1812	IRIS_313-11113	124.761	8.48186	3.89581	0.99999	1e-05	indica	non-glutinous	4055077	Bangladesh	Bangladesh	T	SAE	XI-2
1813	IRIS_313-11114	138.338	28.821	6.25752	0.99999	1e-05	indica	non-glutinous	4055076	Bangladesh	Bangladesh	T	SAE	XI-2
1814	IRIS_313-11115	120.655	-9.31496	-2.20808	0.99999	1e-05	indica	non-glutinous	4055075	Bangladesh	Bangladesh	T	SAE	XI-2
1815	IRIS_313-11116	16.9228	-252.904	7.82423	0.99999	1e-05	indica	non-glutinous	4056182	Bangladesh	Bangladesh	T	SAE	cA (Aus)
1816	IRIS_313-11117	-231.02	31.8657	109.455	0.99999	1e-05	japonica	non-glutinous	4056181	Indonesia	Indonesia	T	SER	GJ-trp
1817	IRIS_313-11118	145.733	47.6124	25.633	0.99999	1e-05	indica	non-glutinous	4494470	Viet Nam	Viet Nam	T	SEA	XI-3
1818	IRIS_313-11082	128.638	52.836	5.59697	0.99999	1e-05	indica	non-glutinous	4055089	Lao People's Democratic Republic	Lao People's Democratic Republic	T	SEA	XI-3
1819	IRIS_313-11119	113.848	3.28913	9.23459	0.99999	1e-05	indica	glutinous	0	Viet Nam	Viet Nam	T	SEA	XI-adm
1820	IRIS_313-11120	131.429	6.50401	-1.76262	0.99999	1e-05	indica	non-glutinous	4056180	Bhutan	Bhutan	T	SAE	XI-2
1821	IRIS_313-11121	-199.996	14.3507	88.3688	0.99999	1e-05	japonica	non-glutinous	4055074	Liberia	Liberia	0	WAF	GJ-trp
1822	IRIS_313-11122	130.971	19.7238	-30.3455	0.99999	1e-05	indica	non-glutinous	4055073	Philippines	Philippines	I	SER-IRRI	XI-1B
1823	IRIS_313-11123	12.4746	-249.708	5.10047	0.99999	1e-05	indica	non-glutinous	4055072	Bangladesh	Bangladesh	P	SAE	cA (Aus)
1824	IRIS_313-11124	11.0753	-206.59	4.86386	0.99999	1e-05	indica	non-glutinous	4055071	Bangladesh	Bangladesh	P	SAE	admix
1825	IRIS_313-11125	23.6657	-43.2556	14.7833	0.99999	1e-05	indica	non-glutinous	0	Bangladesh	Bangladesh	P	SAE	admix
1826	IRIS_313-11126	143.964	44.9438	8.34389	0.99999	1e-05	indica	non-glutinous	4055070	Myanmar	Myanmar	P	SEA	XI-adm
1827	IRIS_313-11127	-237.33	32.27	-15.7741	0.99999	1e-05	japonica	non-glutinous	4055069	Myanmar	Myanmar	0	SEA	GJ-sbtrp
1828	IRIS_313-11128	129.76	26.87	15.1966	0.99999	1e-05	indica	non-glutinous	4055068	Myanmar	Myanmar	0	SEA	XI-adm
1829	IRIS_313-11083	140.317	54.3933	14.6818	0.99999	1e-05	indica	non-glutinous	4055088	Lao People's Democratic Republic	Lao People's Democratic Republic	T	SEA	XI-3
1830	IRIS_313-11129	89.0687	13.0377	12.524	0.99999	1e-05	indica	non-glutinous	4055067	Myanmar	Myanmar	0	SEA	XI-adm
1831	IRIS_313-11130	114.67	13.0173	10.3445	0.99999	1e-05	indica	glutinous	4055066	Myanmar	Myanmar	P	SEA	XI-adm
1832	IRIS_313-11131	97.5917	-51.9592	-11.1667	0.99999	1e-05	indica	non-glutinous	4055065	Myanmar	Myanmar	P	SEA	XI-adm
1833	IRIS_313-11132	137.012	42.2744	7.17516	0.99999	1e-05	indica	non-glutinous	4055064	Myanmar	Myanmar	P	SEA	XI-adm
1834	IRIS_313-11133	129.512	37.497	4.57071	0.99999	1e-05	indica	glutinous	4056179	Myanmar	Myanmar	0	SEA	XI-3
1835	IRIS_313-11134	118.125	17.6892	-8.57863	0.99999	1e-05	indica	non-glutinous	4494471	Myanmar	Myanmar	0	SEA	XI-adm
1836	IRIS_313-11135	141.086	40.1878	19.2824	0.99999	1e-05	indica	non-glutinous	4055063	Myanmar	Myanmar	P	SEA	XI-3
1837	IRIS_313-11136	-18.716	5.68227	11.6783	0.99999	1e-05	japonica	non-glutinous	4055062	Myanmar	Myanmar	0	SEA	admix
1838	IRIS_313-11137	129.459	24.0149	-4.79278	0.99999	1e-05	indica	non-glutinous	4055061	Myanmar	Myanmar	0	SEA	XI-adm
1839	IRIS_313-11138	128.38	25.5591	23.0101	0.99999	1e-05	indica	non-glutinous	4055060	Myanmar	Myanmar	P	SEA	XI-3
1840	IRIS_313-11084	135.636	33.3873	27.8399	0.99999	1e-05	indica	non-glutinous	0	Cambodia	Cambodia	0	SEA	XI-3
1841	IRIS_313-11139	121.142	21.2796	17.571	0.99999	1e-05	indica	non-glutinous	4055059	Myanmar	Myanmar	P	SEA	XI-adm
1842	IRIS_313-11140	133.414	33.3743	15.2733	0.99999	1e-05	indica	non-glutinous	4055058	Myanmar	Myanmar	P	SEA	XI-3
1843	IRIS_313-11141	132.177	25.8138	16.3118	0.99999	1e-05	indica	non-glutinous	4055057	Myanmar	Myanmar	P	SEA	XI-adm
1844	IRIS_313-11142	138.72	28.8513	16.7587	0.99999	1e-05	indica	non-glutinous	4055056	Myanmar	Myanmar	P	SEA	XI-3
1845	IRIS_313-11143	120.163	19.7617	3.87871	0.99999	1e-05	indica	non-glutinous	4055055	Myanmar	Myanmar	0	SEA	XI-adm
1846	IRIS_313-11144	124.842	13.137	12.1557	0.99999	1e-05	indica	non-glutinous	4055054	Myanmar	Myanmar	P	SEA	XI-adm
1847	IRIS_313-11145	135.26	38.5812	13.4239	0.99999	1e-05	indica	non-glutinous	4055053	Myanmar	Myanmar	0	SEA	XI-3
1848	IRIS_313-11146	135.589	36.3378	12.4515	0.99999	1e-05	indica	non-glutinous	4055052	Myanmar	Myanmar	P	SEA	XI-adm
1849	IRIS_313-11147	132.516	13.1992	16.0418	0.99999	1e-05	indica	non-glutinous	4055051	Myanmar	Myanmar	P	SEA	XI-adm
1850	IRIS_313-11148	133.072	27.3821	21.734	0.99999	1e-05	indica	non-glutinous	4055050	Myanmar	Myanmar	P	SEA	XI-3
1851	IRIS_313-11085	121.402	27.1432	1.56283	0.99999	1e-05	indica	non-glutinous	4112074	Lao People's Democratic Republic	Lao People's Democratic Republic	0	SEA	XI-adm
1852	IRIS_313-11149	128.663	39.953	41.3995	0.99999	1e-05	indica	non-glutinous	4055049	Myanmar	Myanmar	P	SEA	XI-3
1853	IRIS_313-11150	133.657	45.1549	21.0575	0.99999	1e-05	indica	non-glutinous	4055048	Myanmar	Myanmar	0	SEA	XI-3
1854	IRIS_313-11151	136.166	60.1377	22.9771	0.99999	1e-05	indica	non-glutinous	4055047	Myanmar	Myanmar	I	SEA	XI-3
1855	IRIS_313-11152	114.086	21.6535	-62.563	0.99999	1e-05	indica	non-glutinous	4056178	India	India	0	SAC	XI-1A
1856	IRIS_313-11153	-210.007	43.8252	-127.832	0.99999	1e-05	japonica	non-glutinous	4055046	India	India	I	SAC	GJ-tmp
1857	IRIS_313-11154	-7.9129	-313.098	8.71023	0.99999	1e-05	japonica	non-glutinous	4056177	Bangladesh	Bangladesh	0	SAE	cA (Aus)
1858	IRIS_313-11155	-246.723	45.3707	-152.243	0.99999	1e-05	japonica	non-glutinous	4056176	India	India	0	SAC	GJ-tmp
1859	IRIS_313-11156	-258.511	48.5114	-33.53	0.99999	1e-05	japonica	non-glutinous	4056175	India	India	I	SAC	GJ-adm
1860	IRIS_313-11157	109.091	14.736	-58.4167	0.99999	1e-05	indica	non-glutinous	4056174	Taiwan	Taiwan	0	EAR	XI-1A
1861	IRIS_313-11158	118.462	20.7452	-67.7357	0.99999	1e-05	indica	non-glutinous	4056173	China	China	0	EAS	XI-1A
1862	IRIS_313-11086	115.427	23.5418	6.67159	0.99999	1e-05	indica	glutinous	4055087	Lao People's Democratic Republic	Lao People's Democratic Republic	0	SEA	XI-3
1863	IRIS_313-11159	-243.564	27.4357	93.547	0.99999	1e-05	japonica	non-glutinous	4055045	Cote d'Ivoire	Cote d'Ivoire	I	WAF	GJ-trp
1864	IRIS_313-11160	115.555	40.7194	36.7083	0.99999	1e-05	indica	non-glutinous	4056172	Liberia	Liberia	0	WAF	XI-3
1865	IRIS_313-11161	-255.412	41.9819	107.978	0.99999	1e-05	japonica	non-glutinous	4055044	Liberia	Liberia	0	WAF	GJ-trp
1866	IRIS_313-11162	135.328	20.8819	-28.6324	0.99999	1e-05	indica	non-glutinous	4056171	Indonesia	Indonesia	T	SER	XI-1B
1867	IRIS_313-11163	-11.7038	-319.963	11.788	0.99999	1e-05	japonica	non-glutinous	4056170	Bangladesh	Bangladesh	T	SAE	cA (Aus)
1868	IRIS_313-11164	-6.24995	-344.425	6.51511	0.99999	1e-05	japonica	non-glutinous	4056169	India	India	0	SAC	cA (Aus)
1869	IRIS_313-11165	54.6086	-207.221	0.0356819	0.99999	1e-05	indica	non-glutinous	4055043	India	India	0	SAC	cA (Aus)
1870	IRIS_313-11166	-2.7884	-303.598	11.2808	0.99999	1e-05	japonica	non-glutinous	4056168	India	India	0	SAC	cA (Aus)
1871	IRIS_313-11167	123.296	-12.0828	-11.4757	0.99999	1e-05	indica	non-glutinous	4056167	India	India	0	SAC	XI-2
1872	IRIS_313-11168	-4.83437	-300.348	12.1187	0.99999	1e-05	japonica	non-glutinous	4056166	India	India	0	SAC	cA (Aus)
1873	IRIS_313-11087	128.572	37.1644	31.7833	0.99999	1e-05	indica	glutinous	4055086	Cambodia	Cambodia	0	SEA	XI-3
1874	IRIS_313-11169	-1.92312	-320.136	7.57139	0.99999	1e-05	japonica	non-glutinous	4056165	India	India	0	SAC	cA (Aus)
1875	IRIS_313-11170	-16.0637	-339.699	11.5525	0.99999	1e-05	japonica	non-glutinous	4056164	India	India	0	SAC	cA (Aus)
1876	IRIS_313-11171	-12.9237	-318.249	1.81414	0.99999	1e-05	japonica	non-glutinous	4056163	India	India	P	SAC	cA (Aus)
1877	IRIS_313-11172	-12.9525	-307.376	9.18872	0.99999	1e-05	japonica	non-glutinous	4056162	India	India	0	SAC	cA (Aus)
1878	IRIS_313-11088	127.519	26.3057	23.9196	0.99999	1e-05	indica	non-glutinous	4055085	Cambodia	Cambodia	0	SEA	XI-3
1879	IRIS_313-11182	122.844	56.5762	48.4473	0.99999	1e-05	indica	non-glutinous	4055039	Indonesia	Indonesia	T	SER	XI-3
1880	IRIS_313-11183	-264.452	47.8229	93.8061	0.99999	1e-05	japonica	glutinous	4055038	Indonesia	Indonesia	T	SER	GJ-trp
1881	IRIS_313-11189	-112.459	-173.343	1.98997	0.99999	1e-05	japonica	non-glutinous	4056151	Union of Soviet Socialist Republics (Former)	Union of Soviet Socialist Republics (Former)	0	WAS	admix
1882	IRIS_313-11191	-60.2943	-290.564	-4.95318	0.99999	1e-05	japonica	non-glutinous	4056150	Sri Lanka	Sri Lanka	T	IOC	cA (Aus)
1883	IRIS_313-11173	-3.74696	-323.713	14.8637	0.99999	1e-05	japonica	non-glutinous	4056161	India	India	0	SAC	cA (Aus)
1884	IRIS_313-11192	144.045	41.9724	17.3808	0.99999	1e-05	indica	non-glutinous	4055036	Thailand	Thailand	I	SEA	XI-3
1885	IRIS_313-11193	126.723	31.8129	8.16517	0.99999	1e-05	indica	non-glutinous	4055035	Thailand	Thailand	0	SEA	XI-3
1886	IRIS_313-11194	140.02	48.3233	36.634	0.99999	1e-05	indica	non-glutinous	4494472	Thailand	Thailand	0	SEA	XI-3
1887	IRIS_313-11195	-240.394	29.2173	-15.893	0.99999	1e-05	japonica	non-glutinous	4056149	Myanmar	Myanmar	T	SEA	GJ-sbtrp
1888	IRIS_313-11196	129.946	41.699	13.3365	0.99999	1e-05	indica	non-glutinous	4112053	Philippines	Philippines	T	SER	XI-3
1889	IRIS_313-11197	127.948	23.5976	-34.9255	0.99999	1e-05	indica	non-glutinous	4056148	India	India	P	SAC	XI-adm
1890	IRIS_313-11198	-280.105	47.4194	-191.512	0.99999	1e-05	japonica	non-glutinous	4111997	India	India	P	SAC	GJ-tmp
1891	IRIS_313-11199	122.288	8.64699	-24.4861	0.99999	1e-05	indica	non-glutinous	4055034	India	India	0	SAC	XI-adm
1892	IRIS_313-11200	130.157	36.9639	10.065	0.99999	1e-05	indica	non-glutinous	4055033	India	India	I	SAC	XI-1B
1893	IRIS_313-11201	-256.954	37.4117	-180.572	0.99999	1e-05	japonica	non-glutinous	4056147	China	China	I	EAS	GJ-tmp
1894	IRIS_313-11174	1.59741	-300.74	10.2561	0.99999	1e-05	indica	non-glutinous	4056160	India	India	0	SAC	cA (Aus)
1895	IRIS_313-11202	-290.109	51.0553	-190.188	0.99999	1e-05	japonica	non-glutinous	4055032	China	China	I	EAS	GJ-tmp
1896	IRIS_313-11203	130.359	19.0796	9.01591	0.99999	1e-05	indica	non-glutinous	4055031	Bangladesh	Bangladesh	T	SAE	XI-2
1897	IRIS_313-11204	96.7121	-66.8774	10.4802	0.99999	1e-05	indica	non-glutinous	4055030	Bangladesh	Bangladesh	T	SAE	XI-adm
1898	IRIS_313-11205	139.283	23.9341	-4.80736	0.99999	1e-05	indica	non-glutinous	4055029	Bangladesh	Bangladesh	T	SAE	XI-2
1899	IRIS_313-11206	122.816	19.0767	21.9406	0.99999	1e-05	indica	non-glutinous	4055028	Bangladesh	Bangladesh	T	SAE	XI-adm
1900	IRIS_313-11207	119.806	-7.59513	4.36424	0.99999	1e-05	indica	non-glutinous	4055027	Bangladesh	Bangladesh	T	SAE	XI-2
1901	IRIS_313-11208	120.752	14.6688	12.2668	0.99999	1e-05	indica	non-glutinous	4055026	Bangladesh	Bangladesh	T	SAE	XI-adm
1902	IRIS_313-11209	125.512	7.66642	-8.87313	0.99999	1e-05	indica	non-glutinous	4494473	Bangladesh	Bangladesh	T	SAE	XI-2
1903	IRIS_313-11210	-4.72862	-300.504	10.0674	0.99999	1e-05	japonica	non-glutinous	4056146	Bangladesh	Bangladesh	T	SAE	cA (Aus)
1904	IRIS_313-11211	128.928	-16.0888	-13.112	0.99999	1e-05	indica	non-glutinous	4055025	Bangladesh	Bangladesh	T	SAE	XI-2
1905	IRIS_313-11175	-7.88283	-316.889	5.42413	0.99999	1e-05	japonica	non-glutinous	4056159	India	India	0	SAC	cA (Aus)
1906	IRIS_313-11212	130.109	-14.3844	-6.96973	0.99999	1e-05	indica	non-glutinous	4055024	Bangladesh	Bangladesh	T	SAE	XI-2
1907	IRIS_313-11213	-1.12059	-316.194	10.714	0.99999	1e-05	japonica	non-glutinous	4056145	Bangladesh	Bangladesh	T	SAE	cA (Aus)
1908	IRIS_313-11214	10.6623	-277.179	6.39746	0.99999	1e-05	indica	non-glutinous	4056144	Bangladesh	Bangladesh	T	SAE	cA (Aus)
1909	IRIS_313-11216	8.51002	-268.543	5.58537	0.99999	1e-05	indica	non-glutinous	4055022	Bangladesh	Bangladesh	P	SAE	cA (Aus)
1910	IRIS_313-11217	-144.669	-45.2124	4.91017	0.99999	1e-05	japonica	non-glutinous	0	Bangladesh	Bangladesh	P	SAE	cB (Bas)
1911	IRIS_313-11218	-178.329	-60.6323	9.54061	0.99999	1e-05	japonica	non-glutinous	4055021	Bangladesh	Bangladesh	P	SAE	cB (Bas)
1912	IRIS_313-11219	112.542	-3.88162	-0.815429	0.99999	1e-05	indica	non-glutinous	4055020	Bangladesh	Bangladesh	P	SAE	XI-2
1913	IRIS_313-11220	139.298	-7.29859	4.6389	0.99999	1e-05	indica	non-glutinous	4055019	Bangladesh	Bangladesh	P	SAE	XI-2
1914	IRIS_313-11221	141.607	19.4795	0.102251	0.99999	1e-05	indica	non-glutinous	4055018	Bangladesh	Bangladesh	P	SAE	XI-2
1915	IRIS_313-11176	85.0998	-75.0519	21.2576	0.99999	1e-05	indica	non-glutinous	4056158	India	India	0	SAC	XI-adm
1916	IRIS_313-11222	122.591	7.88556	6.09551	0.99999	1e-05	indica	non-glutinous	4055017	Bangladesh	Bangladesh	P	SAE	XI-2
1917	IRIS_313-11223	-94.9086	-22.3663	2.55324	0.99999	1e-05	japonica	non-glutinous	4055016	Bangladesh	Bangladesh	P	SAE	cB (Bas)
1918	IRIS_313-11224	132.237	13.9371	-0.897886	0.99999	1e-05	indica	non-glutinous	4055015	Bangladesh	Bangladesh	P	SAE	XI-2
1919	IRIS_313-11225	125.779	24.7274	4.09096	0.99999	1e-05	indica	non-glutinous	4055014	Bangladesh	Bangladesh	P	SAE	XI-adm
1920	IRIS_313-11226	135.704	12.6224	-2.74482	0.99999	1e-05	indica	non-glutinous	4055013	Bangladesh	Bangladesh	P	SAE	XI-2
1921	IRIS_313-11227	118.147	2.7905	12.0696	0.99999	1e-05	indica	non-glutinous	4055012	Bangladesh	Bangladesh	P	SAE	XI-2
1922	IRIS_313-11228	133.72	16.6646	-0.953824	0.99999	1e-05	indica	non-glutinous	4055011	Bangladesh	Bangladesh	P	SAE	XI-2
1923	IRIS_313-11229	137.087	17.3986	4.79525	0.99999	1e-05	indica	non-glutinous	4055010	Bangladesh	Bangladesh	P	SAE	XI-2
1924	IRIS_313-11230	122.199	7.97045	11.0264	0.99999	1e-05	indica	non-glutinous	4055009	Bangladesh	Bangladesh	P	SAE	XI-2
1925	IRIS_313-11231	132.898	15.1638	-0.296722	0.99999	1e-05	indica	non-glutinous	4494474	Bangladesh	Bangladesh	P	SAE	XI-2
1926	IRIS_313-11177	132.403	34.0595	31.0716	0.99999	1e-05	indica	non-glutinous	4056157	Indonesia	Indonesia	T	SER	XI-adm
1927	IRIS_313-11232	-1.25385	-235.036	2.62189	0.99999	1e-05	japonica	non-glutinous	4056143	India	India	0	SAC	cA (Aus)
1928	IRIS_313-11233	135.004	39.4703	-2.22586	0.99999	1e-05	indica	non-glutinous	4056142	Thailand	Thailand	P	SEA	XI-1B
1929	IRIS_313-11234	117.524	57.9952	4.58674	0.99999	1e-05	indica	non-glutinous	4056141	Philippines	Philippines	T	SER	XI-adm
1930	IRIS_313-11235	122.288	7.84922	24.7323	0.99999	1e-05	indica	non-glutinous	4055008	Philippines	Philippines	P	SER	XI-adm
1931	IRIS_313-11237	108.889	9.72285	-19.5411	0.99999	1e-05	indica	non-glutinous	4056140	Taiwan	Taiwan	I	EAR	XI-1B
1932	IRIS_313-11239	136.911	55.0699	13.8421	0.99999	1e-05	indica	non-glutinous	4055006	Indonesia	Indonesia	I	SER	XI-adm
1933	IRIS_313-11240	124.396	15.8885	-45.0014	0.99999	1e-05	indica	non-glutinous	4055005	India	India	I	SAC	XI-adm
1934	IRIS_313-11241	126.467	6.29848	-24.8795	0.99999	1e-05	indica	non-glutinous	4055004	Bangladesh	Bangladesh	I	SAE	XI-2
1935	IRIS_313-11178	100.402	25.317	29.2555	0.99999	1e-05	indica	non-glutinous	4055042	Indonesia	Indonesia	T	SER	XI-3
1936	IRIS_313-11242	129.491	0.716772	-6.47244	0.99999	1e-05	indica	non-glutinous	4055003	India	India	I	SAC	XI-2
1937	IRIS_313-11243	56.5126	-144.359	-19.3959	0.99999	1e-05	indica	non-glutinous	4056139	India	India	I	SAC	admix
1938	IRIS_313-11244	135.993	46.1375	-37.5898	0.99999	1e-05	indica	non-glutinous	0	India	India	0	SAC	XI-adm
1939	IRIS_313-11245	141.846	58.3641	-14.2293	0.99999	1e-05	indica	non-glutinous	4055002	India	India	P	SAC	XI-adm
1940	IRIS_313-11246	-245.724	36.5153	-149.547	0.99999	1e-05	japonica	non-glutinous	4112071	Japan	Japan	0	EAR	GJ-tmp
1941	IRIS_313-11247	124.948	28.3313	-57.0683	0.99999	1e-05	indica	non-glutinous	4111996	India	India	I	SAC	XI-adm
1942	IRIS_313-11248	-231.601	30.5386	86.5728	0.99999	1e-05	japonica	glutinous	4056138	Thailand	Thailand	T	SEA	GJ-trp
1943	IRIS_313-11249	135.928	22.0126	-16.2598	0.99999	1e-05	indica	non-glutinous	4112018	Philippines	Philippines	I	SER-IRRI	XI-adm
1944	IRIS_313-11250	122.802	31.106	-3.75511	0.99999	1e-05	indica	non-glutinous	4056137	Philippines	Philippines	I	SER-IRRI	XI-1B
1945	IRIS_313-11251	130.374	47.2755	-21.4066	0.99999	1e-05	indica	non-glutinous	4112017	Philippines	Philippines	I	SER-IRRI	XI-1B
1946	IRIS_313-11179	125.081	39.2325	26.5835	0.99999	1e-05	indica	non-glutinous	4056156	Indonesia	Indonesia	T	SER	XI-3
1947	IRIS_313-11253	75.1815	42.3201	-1.52986	0.99999	1e-05	indica	non-glutinous	0	Surinam	Surinam	I	SAM	XI-adm
1948	IRIS_313-11254	114.53	24.9678	26.5657	0.99999	1e-05	indica	non-glutinous	4055000	Viet Nam	Viet Nam	0	SEA	XI-3
1949	IRIS_313-11255	111.534	-1.68954	-14.8346	0.99999	1e-05	indica	non-glutinous	4056136	India	India	0	SAC	XI-adm
1950	IRIS_313-11256	145.429	30.9609	-7.89172	0.99999	1e-05	indica	non-glutinous	4054999	India	India	0	SAC	XI-adm
1951	IRIS_313-11257	-1.535	41.8533	0.609162	0.99999	1e-05	japonica	non-glutinous	4054998	India	India	0	SAC	XI-adm
1952	IRIS_313-11259	-104.5	-55.3346	9.47492	0.99999	1e-05	japonica	non-glutinous	4054996	India	India	0	SAC	cB (Bas)
1953	IRIS_313-11260	88.68	6.53172	-13.1434	0.99999	1e-05	indica	non-glutinous	4054995	India	India	0	SAC	XI-adm
1954	IRIS_313-11261	122.774	18.7109	7.78214	0.99999	1e-05	indica	non-glutinous	4054994	India	India	0	SAC	XI-adm
1955	IRIS_313-11180	106.733	42.1344	28.2144	0.99999	1e-05	indica	glutinous	4055041	Indonesia	Indonesia	T	SER	XI-3
1956	IRIS_313-11262	141.329	35.1633	-10.9938	0.99999	1e-05	indica	non-glutinous	4054993	India	India	0	SAC	XI-adm
1957	IRIS_313-11263	62.9192	27.2605	10.1298	0.99999	1e-05	indica	non-glutinous	4054992	India	India	0	SAC	XI-adm
1958	IRIS_313-11264	144.115	46.5143	-1.61708	0.99999	1e-05	indica	non-glutinous	4054991	India	India	0	SAC	XI-adm
1959	IRIS_313-11265	-12.3866	-325.208	6.6683	0.99999	1e-05	japonica	non-glutinous	4054990	India	India	0	SAC	cA (Aus)
1960	IRIS_313-11181	113.969	23.1414	23.6806	0.99999	1e-05	indica	non-glutinous	4055040	Indonesia	Indonesia	T	SER	XI-3
1961	IRIS_313-11275	118.414	-8.12322	-8.69484	0.99999	1e-05	indica	non-glutinous	4056133	India	India	0	SAC	XI-adm
1962	IRIS_313-11276	106.624	27.6184	-1.19261	0.99999	1e-05	indica	non-glutinous	4112052	India	India	0	SAC	XI-adm
1963	IRIS_313-11277	14.699	-265.088	-1.46381	0.99999	1e-05	indica	non-glutinous	4056132	India	India	0	SAC	cA (Aus)
1964	IRIS_313-11278	125.32	37.8433	-18.5577	0.99999	1e-05	indica	non-glutinous	4056131	India	India	0	SAC	XI-adm
1965	IRIS_313-11279	88.3363	41.8412	-14.1131	0.99999	1e-05	indica	non-glutinous	4054982	India	India	0	SAC	XI-adm
1966	IRIS_313-11280	117.7	53.4124	20.0751	0.99999	1e-05	indica	non-glutinous	4494475	India	India	0	SAC	XI-adm
1967	IRIS_313-11281	128.27	33.2173	-78.4719	0.99999	1e-05	indica	non-glutinous	4056130	India	India	0	SAC	XI-1A
1968	IRIS_313-11282	128.671	3.44655	9.32651	0.99999	1e-05	indica	non-glutinous	4054981	India	India	0	SAC	XI-2
1969	IRIS_313-11283	100.518	10.2196	-20.5153	0.99999	1e-05	indica	non-glutinous	4112051	India	India	0	SAC	XI-adm
1970	IRIS_313-11284	121.873	20.4849	5.8648	0.99999	1e-05	indica	non-glutinous	4112016	India	India	0	SAC	XI-adm
1971	IRIS_313-11266	144.925	52.434	-2.94706	0.99999	1e-05	indica	non-glutinous	4054989	India	India	0	SAC	XI-adm
1972	IRIS_313-11285	116.245	-0.457729	-15.1644	0.99999	1e-05	indica	non-glutinous	4056129	India	India	0	SAC	XI-2
1973	IRIS_313-11286	91.6284	-6.49367	-18.1027	0.99999	1e-05	indica	non-glutinous	4494476	India	India	0	SAC	XI-adm
1974	IRIS_313-11287	131.935	34.2827	6.14608	0.99999	1e-05	indica	non-glutinous	4054980	India	India	0	SAC	XI-adm
1975	IRIS_313-11288	101.733	-4.9822	10.4461	0.99999	1e-05	indica	non-glutinous	4054979	India	India	0	SAC	XI-adm
1976	IRIS_313-11289	-188.52	-42.6342	2.28674	0.99999	1e-05	japonica	non-glutinous	4054978	India	India	0	SAC	cB (Bas)
1977	IRIS_313-11290	1.71926	0.106932	-8.49737	0.99999	1e-05	indica	non-glutinous	4056128	India	India	0	SAC	admix
1978	IRIS_313-11291	2.31891	-272.351	8.7707	0.99999	1e-05	indica	non-glutinous	4056127	India	India	0	SAC	cA (Aus)
1979	IRIS_313-11292	129.391	21.3561	11.4567	0.99999	1e-05	indica	non-glutinous	4054977	India	India	0	SAC	XI-adm
1980	IRIS_313-11293	-155.749	-51.5089	3.43476	0.99999	1e-05	japonica	non-glutinous	4054976	India	India	0	SAC	cB (Bas)
1981	IRIS_313-11294	128.988	20.0975	4.73782	0.99999	1e-05	indica	non-glutinous	4054975	India	India	0	SAC	XI-2
1982	IRIS_313-11267	135.983	35.6154	5.07129	0.99999	1e-05	indica	non-glutinous	4054988	India	India	0	SAC	XI-2
1983	IRIS_313-11295	7.43107	-34.5841	-7.72497	0.99999	1e-05	indica	non-glutinous	4056126	India	India	0	SAC	admix
1984	IRIS_313-11296	119.318	10.8829	-16.4379	0.99999	1e-05	indica	non-glutinous	4054974	India	India	0	SAC	XI-adm
1985	IRIS_313-11297	-216.839	-11.362	-11.1618	0.99999	1e-05	japonica	non-glutinous	4054973	India	India	0	SAC	admix
1986	IRIS_313-11298	-25.9387	-324.666	5.09448	0.99999	1e-05	japonica	non-glutinous	4056125	India	India	0	SAC	cA (Aus)
1987	IRIS_313-11299	117.232	14.9974	-3.47506	0.99999	1e-05	indica	glutinous	4054972	India	India	0	SAC	XI-adm
1988	IRIS_313-11300	101.532	-19.2878	-2.61696	0.99999	1e-05	indica	non-glutinous	4054971	India	India	0	SAC	XI-2
1989	IRIS_313-11301	135.091	16.77	15.0849	0.99999	1e-05	indica	non-glutinous	4054970	India	India	0	SAC	XI-2
1990	IRIS_313-11302	84.7921	-63.0484	-9.15204	0.99999	1e-05	indica	non-glutinous	4056124	India	India	0	SAC	XI-adm
1991	IRIS_313-11303	115.068	11.2031	-14.2897	0.99999	1e-05	indica	non-glutinous	4056123	India	India	0	SAC	XI-adm
1992	IRIS_313-11304	133.84	39.8846	0.556613	0.99999	1e-05	indica	non-glutinous	4056122	India	India	0	SAC	XI-adm
1993	IRIS_313-11268	-155.846	-42.756	0.927968	0.99999	1e-05	japonica	non-glutinous	4054987	India	India	0	SAC	cB (Bas)
1994	IRIS_313-11305	87.7635	24.714	0.487577	0.99999	1e-05	indica	non-glutinous	4054969	India	India	0	SAC	XI-adm
1995	IRIS_313-11306	127.96	26.142	-14.5043	0.99999	1e-05	indica	non-glutinous	4056121	India	India	0	SAC	XI-adm
1996	IRIS_313-11307	132.066	27.1831	0.475879	0.99999	1e-05	indica	non-glutinous	4054968	India	India	0	SAC	XI-adm
1997	IRIS_313-11308	141.021	28.607	-2.72468	0.99999	1e-05	indica	non-glutinous	4054967	India	India	0	SAC	XI-2
1998	IRIS_313-11309	138.908	43.1616	-6.34218	0.99999	1e-05	indica	non-glutinous	4056120	India	India	0	SAC	XI-adm
[truncated: 118 more rows]
