# Supplementary material for: Genome Wide Association Study on Development and Evolution of Glutinous Rice
Source: Research Square preprint supplement (doi:10.21203/rs.3.rs-649622/v1), 2021-07-06
Supplement: Supplementary file 6 [file c591dae73f186bc42fd85829.xlsx]

## Sheet: Full
Supplementary Table S4: Expression analysis of candidate genes in full population.
Gene ID	GSE98924 for 7-8 day seeds (FPKM)	GSE13233 for 10-14 day seeds (RPKM)
LOC_Os06g03970	6.28	0.603842
LOC_Os06g03980	0.926667	4.75614
LOC_Os06g03990	20.4533	4.61541
LOC_Os06g04010	11.1967	2.5362
LOC_Os06g04020	433.143	29.0436
LOC_Os06g04030	460.567	231.745
LOC_Os06g04040	4.72667	1.78257
LOC_Os06g04060	0	-
LOC_Os06g04169	56.44	0.0826869
LOC_Os06g04190	4.29667	0.376141
LOC_Os06g04200	0.403333	1169.8
LOC_Os06g12450	0.0566667	80.9651
LOC_Os06g12590	8.76	0.233758
LOC_Os06g04150	11.0667	0
LOC_Os06g04510	7.23667	0
LOC_Os06g04300	17.99	9.84658
LOC_Os06g04500	17.9133	2.73034
LOC_Os06g04310	0.0966667	-
LOC_Os06g04450	5.16	0.368305
LOC_Os06g12030	2.84	0.518288
LOC_Os06g04220	2.35333	0
LOC_Os06g04130	25	3.27614
LOC_Os06g04410	0.293333	0
LOC_Os06g04440	0	-
LOC_Os06g04120	0.146667	-
LOC_Os06g04240	7.13	2.96555
LOC_Os06g04490	0.11	-
LOC_Os06g04080	0.433333	0.0552263
LOC_Os06g04230	30.3033	1.99346
LOC_Os06g12830	0.15	0
LOC_Os06g04000	20.1967	4.28961
LOC_Os06g04090	10.7167	0
LOC_Os06g12810	1.37333	0
LOC_Os06g12790	8.79	0.358666
LOC_Os06g12860	0	-
LOC_Os06g06960	0.513333	0.115916
LOC_Os06g04280	51.65	4.29833
LOC_Os06g12800	0.376667	-
LOC_Os06g12850	0	0.0884043
LOC_Os06g04480	16.7567	0.119305
LOC_Os06g12820	12.0267	0.0337346
LOC_Os06g05190	3.94667	1.6988
LOC_Os06g03830	10.29	0
LOC_Os04g33140	0.0766667	0.187072
LOC_Os06g12480	0.09	0.211683
LOC_Os06g03880	0	-
LOC_Os10g22484	5.87	0.331401
LOC_Os06g03960	2.81	-
LOC_Os06g10480	16.0133	0.477125
LOC_Os02g09620	11.8433	0
LOC_Os06g03940	29.1267	3.56688
LOC_Os06g03890	0	-
LOC_Os06g07020	3.70667	0.514869
LOC_Os06g03900	0	-
LOC_Os06g08850	17.5767	1.97002
LOC_Os06g03860	45.5567	0.593376
LOC_Os06g03850	8.85	2.37234
LOC_Os06g03840	9.29	3.55423
LOC_Os06g03810	0.26	0.0661274
LOC_Os06g12260	20.1233	7.0984
LOC_Os01g14200	0	0
LOC_Os04g33190	18.9567	2.11052
LOC_Os04g33030	66.9667	6.19193
LOC_Os04g33040	71.21	5.56002
LOC_Os06g12460	8.36	0.117776
LOC_Os06g08520	0	-
LOC_Os06g08860	6.45333	0.137047
LOC_Os02g43519	20.78	3.63551
LOC_Os06g09000	0.0466667	-
LOC_Os10g22520	9.84667	0
LOC_Os12g28770	27.9333	0.708936
LOC_Os06g04140	4.12	0.153211
LOC_Os04g33090	0.0233333	-
LOC_Os10g22510	2.3	0.144901
LOC_Os06g06950	0.00666667	-
LOC_Os04g33080	53.45	0.201611
LOC_Os06g04399	84.1367	10.9216
LOC_Os06g04470	20.57	4.61289
LOC_Os01g21740	0	-
LOC_Os05g43830	11.9867	7.32131
LOC_Os06g08990	5.79667	11.3241
LOC_Os04g33100	0	-
LOC_Os04g33120	0	0.0353741
LOC_Os06g04070	35.74	2.65337
LOC_Os03g30100	0	-
LOC_Os02g09600	34.2567	49.5099
LOC_Os06g06940	3.61333	0.285348
LOC_Os06g40000	0	-
LOC_Os03g42464	44.4967	2.17811
LOC_Os02g09590	68.6167	5.69756
LOC_Os01g21720	0	-
LOC_Os06g03580	13.5633	0.318673
LOC_Os06g11360	0.0166667	-
LOC_Os08g39174	0	0.0198158
LOC_Os06g08900	0.0266667	-
LOC_Os03g44930	0	-
LOC_Os06g03090	0.13	0
LOC_Os01g21750	0.103333	-
LOC_Os04g33150	0.58	2849.04
LOC_Os04g33230	0.03	-
LOC_Os06g04360	3.12	0.504572
LOC_Os08g02470	0	-
LOC_Os02g09630	5.98667	7.23094
LOC_Os06g06980	151.183	3.26021
LOC_Os04g33200	10.1533	1.37497
LOC_Os06g04960	0.0233333	0.112444
LOC_Os04g47360	0.706667	0.772859
LOC_Os06g03800	19.44	0.365366
LOC_Os03g40120	0	-
LOC_Os01g23020	0.01	-
LOC_Os08g39140	14.2167	51.1307
LOC_Os04g52479	23.6967	2.10081
LOC_Os06g12560	1.79333	0
LOC_Os06g11380	25.2633	12.5181
LOC_Os12g13300	5.06333	0.231789
LOC_Os06g09060	0	-
LOC_Os10g20280	0.01	0.214982
LOC_Os01g17320	2.13667	0.412915
LOC_Os04g47410	53.0067	2.94032
LOC_Os11g01580	0.27	-
LOC_Os06g12620	0.603333	0.452232
LOC_Os06g08550	1.39333	0.154463
LOC_Os06g03820	5.10667	0.111446
LOC_Os06g11050	0.01	0
LOC_Os06g04530	70.43	20.9382
LOC_Os06g08510	1.54	0.615363
LOC_Os02g03930	1.96667	0.177979
LOC_Os01g17214	4.47	0
LOC_Os03g30010	0	-
LOC_Os01g23640	14.3467	4.45619
LOC_Os01g17279	32.4033	8.92646
LOC_Os01g21530	0	-
LOC_Os04g47380	5.80333	0.413374
LOC_Os03g26380	0	-
LOC_Os08g03430	5.89667	1.56824
LOC_Os05g48240	34.7967	5.49473
LOC_Os12g29040	0	-
LOC_Os01g17170	27.7533	0.192325
LOC_Os12g39680	0.103333	0
LOC_Os05g09708	0.0233333	0.234022
LOC_Os06g03700	53.41	0.202086
LOC_Os06g03690	24.6067	11.2563
LOC_Os04g47400	6.34333	7.50376
LOC_Os01g27570	0	-
LOC_Os02g03900	0.0966667	0.0553208
LOC_Os08g27180	0	0.0152603
LOC_Os04g47350	0	-
LOC_Os06g12690	114.28	31.3998
LOC_Os08g27190	0	-
LOC_Os01g21710	0	-
LOC_Os01g13690	17.2967	2.20273
LOC_Os04g33210	4.40333	0.14437
LOC_Os04g47120	49.46	0.816626
LOC_Os04g33220	20.7967	1.31023
LOC_Os03g24050	0.673333	0.145625
LOC_Os01g17300	0.57	0.0656352
LOC_Os04g47140	7.58333	0.23686
LOC_Os04g47190	20.2033	17.6717
LOC_Os08g34760	7.52	1.62784
LOC_Os02g09610	3.24667	0
LOC_Os01g17260	20.62	1.6081
LOC_Os06g39990	0	-
LOC_Os03g08100	35.09	0.32321
LOC_Os04g47370	18.0867	21.9682
LOC_Os01g21210	0	-
LOC_Os10g37490	7.33	1.71414
LOC_Os06g12170	35.2433	0.79675
LOC_Os06g11230	0	-
LOC_Os06g03760	44.2467	3.75903
LOC_Os12g39660	21.3167	2.396
LOC_Os04g47390	0.02	-
LOC_Os01g17240	9.75333	0.165947
LOC_Os02g43500	65.4767	0.877844
LOC_Os04g02620	0.4	0
LOC_Os08g01270	8.87	0.354231
LOC_Os03g30020	0	-
LOC_Os06g03080	0.00666667	-
LOC_Os06g40060	37.8967	72.5144
LOC_Os06g12600	19.9867	0.152824
LOC_Os03g30110	0	0
LOC_Os05g11080	0.00666667	0
LOC_Os01g21730	0	-
LOC_Os04g47220	232.85	2.47063
LOC_Os03g02762	0.22	0.329006
LOC_Os01g21810	0	-
LOC_Os06g08970	0	-
LOC_Os06g04330	11.8867	2.96865
LOC_Os03g07100	7.73	3.8883
LOC_Os03g30450	0	0
LOC_Os06g40020	59.1733	0.141196
LOC_Os06g10140	4.22667	0.188552
LOC_Os06g08910	12.48	0.414865
LOC_Os06g06560	57.8133	96.4438
LOC_Os04g47330	0.123333	0.0692057
LOC_Os01g21760	0	-
LOC_Os03g40220	0	-
LOC_Os01g17250	62.8567	4.07295
LOC_Os04g47290	5.14667	0.230251
LOC_Os06g12882	22.9167	6.41472
LOC_Os04g47250	48.9133	0.461146
LOC_Os09g09770	0	-
LOC_Os06g11350	0	-
LOC_Os06g08840	28.77	8.37034
LOC_Os07g10250	22.5767	7.43074
LOC_Os03g02790	4.19	0
LOC_Os09g08210	0	-
LOC_Os06g02450	0.353333	-
LOC_Os02g09569	0	-
LOC_Os06g02870	4.13333	0.850669
LOC_Os04g47150	0.823333	-
LOC_Os04g47260	17.5833	5.10523
LOC_Os06g12640	0.0233333	0
LOC_Os04g47310	134.327	4.26199
LOC_Os09g37310	0.316667	0.0569722
LOC_Os08g34800	1.81667	0.401788
LOC_Os06g12120	2.83333	0.0711102
LOC_Os04g33070	4.24	-
LOC_Os02g09550	0	-
LOC_Os03g40110	17.39	12.036
LOC_Os06g12950	3.73	0.43789
LOC_Os06g13020	9.46667	0.62656
LOC_Os06g04380	13.5933	1.49056
LOC_Os06g03710	0.14	0.435374
LOC_Os09g37260	2.45333	0
LOC_Os03g29510	0	-
LOC_Os03g30280	0	-
LOC_Os06g12610	0.213333	0.0803761
LOC_Os06g03790	12.7133	3.52801
LOC_Os04g47320	1.69667	0
LOC_Os01g21630	3.15333	0
LOC_Os04g47420	0.72	0
LOC_Os06g04350	20.7467	15.9508
LOC_Os06g04195	0.236667	5.16248
LOC_Os04g47130	4.31667	1.17951
LOC_Os06g40050	29.4033	8.07238
LOC_Os01g21820	22.0767	2.05956
LOC_Os06g04370	1.11333	0.225012
LOC_Os03g08110	57.8867	0.664705
LOC_Os06g04250	14.0633	1.40463
LOC_Os04g47240	16.3767	2.14985
LOC_Os06g03750	4.93333	1.43039
LOC_Os06g08810	0.146667	-
LOC_Os03g02939	1.39667	0
LOC_Os06g12876	3.39333	3.64821
LOC_Os01g21480	0	-
LOC_Os01g13620	0.09	-
LOC_Os06g04270	112.97	0.902635
LOC_Os06g12380	0.456667	0
LOC_Os06g12580	134.63	13.843
LOC_Os06g04290	79.4067	47.5745
LOC_Os06g12310	39.48	-
LOC_Os06g12840	0	-
LOC_Os06g04210	9.81667	0.679601
LOC_Os06g04520	5.87667	0.188876
LOC_Os06g12330	0	0
LOC_Os06g10520	20.9633	3.5935
LOC_Os01g13990	0	-
LOC_Os06g03600	38.2667	14.066
LOC_Os06g10250	0	-
LOC_Os06g12290	0.0266667	-
LOC_Os06g03920	4.26	2.07229
LOC_Os06g07120	11.3133	0.899
LOC_Os02g43530	0	0.245166
LOC_Os06g07130	21.09	2.17628
LOC_Os06g10090	0	-
LOC_Os06g03910	12.4933	8.86736
LOC_Os06g12510	0.396667	0.0742392
LOC_Os06g04580	15.7533	2.66236
LOC_Os06g04420	0	-
LOC_Os06g03930	89.0933	0.253083
LOC_Os04g33170	0	-
LOC_Os01g14010	0.14	0
LOC_Os06g37520	0	0
LOC_Os04g33110	150.23	78.8008
LOC_Os06g09040	0	0
LOC_Os01g13700	58.7933	16.609
LOC_Os04g33115	0.06	1.95074
LOC_Os07g10090	0	0
LOC_Os02g09520	0	-
LOC_Os02g09540	0.656667	-
LOC_Os04g33180	0	-
LOC_Os06g06970	2.18	0.191222
LOC_Os06g10360	0	0.0121743
LOC_Os04g02630	0	-
LOC_Os04g33160	0	-
LOC_Os06g08980	0	-
LOC_Os04g33050	1.68333	0.174374
LOC_Os02g09580	0	0
LOC_Os01g21000	0	-
LOC_Os06g06990	11.9833	0.123408
LOC_Os06g03650	0	-
LOC_Os06g08960	0	-
LOC_Os01g49400	0	-
LOC_Os06g02440	30.8267	8.07176
LOC_Os06g08920	7.87333	-
LOC_Os06g07140	34.01	11.1485
LOC_Os06g03670	0.903333	0
LOC_Os06g39980	0	-
LOC_Os03g07050	0.0466667	-
LOC_Os01g21620	2.11	0
LOC_Os01g17180	34.43	25.9817
LOC_Os04g47450	0.116667	-
LOC_Os04g47490	0	-
LOC_Os01g21550	0	-
LOC_Os06g11370	16.8033	3.71522
LOC_Os06g40070	10.8333	0
LOC_Os08g27200	0	-
LOC_Os03g03700	2.68	-
LOC_Os06g12720	0.04	0
LOC_Os06g12750	0	-
LOC_Os06g04870	7.71667	0.0953667
LOC_Os06g40030	12.02	0.0411
LOC_Os10g30090	8.40667	0.667088
LOC_Os01g21780	0.01	-
LOC_Os04g33240	8.02667	0.0681274
LOC_Os02g43440	0.02	0.611295
LOC_Os06g04840	1.29667	0.142369
LOC_Os08g03420	1.67	4.77961
LOC_Os06g12630	16.3267	0.870031
LOC_Os09g30170	6.53	0.424056
LOC_Os06g03220	0	-
LOC_Os01g13500	0.363333	0
LOC_Os01g21360	0	-
LOC_Os06g40040	31.9067	17.1337
LOC_Os09g37270	16.4333	2.37206
LOC_Os06g11308	0	-
LOC_Os06g12760	0	-
LOC_Os09g08140	0	-
LOC_Os07g37330	2.21333	-
LOC_Os01g72170	37.34	0
LOC_Os06g07070	19.9267	16.4155
LOC_Os11g16710	0	-
LOC_Os01g17310	0	-
LOC_Os01g49390	0.126667	-
LOC_Os03g30030	0.0133333	0
LOC_Os02g43540	60.95	0.117842
LOC_Os03g30000	8.11333	1.12798
LOC_Os03g24100	3.95667	-
LOC_Os08g27210	0	-
LOC_Os06g12680	8.35667	0.738273
LOC_Os03g24040	22.4733	20.3084
LOC_Os04g47280	4.34333	2.51046
LOC_Os06g11220	0	-
LOC_Os06g08950	0	-
LOC_Os06g11800	33.6533	2.80086
LOC_Os06g02270	0.0266667	-
LOC_Os02g09650	7.66	6.60854
LOC_Os06g10130	3.18667	0
LOC_Os03g30430	224.677	45.754
LOC_Os10g26450	0	-
LOC_Os10g25680	34.4567	3.10388
LOC_Os01g41270	0.173333	0.166566
LOC_Os03g02780	9.54667	3.20205
LOC_Os03g30440	0	-
LOC_Os06g11610	2.83333	1.06875
LOC_Os06g39970	0.37	0
LOC_Os04g47300	2.28667	17.3843
LOC_Os08g03450	170.96	67.4593
LOC_Os02g42720	3.01667	-
LOC_Os03g30470	5.70333	0
LOC_Os06g03682	20.03	2.68438
LOC_Os03g07090	0	-
LOC_Os06g11690	0	-
LOC_Os06g06930	1.67333	0.0514325
LOC_Os01g21580	0.0633333	-
LOC_Os08g26050	0	-
LOC_Os06g07090	37.0833	4.81975
LOC_Os06g11190	8.74	0.678652
LOC_Os01g21340	0	-
LOC_Os04g14860	0	-
LOC_Os01g21660	0	-
LOC_Os06g04460	24.63	4.39461
LOC_Os06g03676	3.77667	0.321354
LOC_Os03g02770	0	0.908382
LOC_Os05g01570	2.12667	0
LOC_Os01g21790	0	-
LOC_Os06g08530	104.683	12.0014
LOC_Os06g02880	0.00333333	-
LOC_Os07g01410	0.0233333	-
LOC_Os05g09732	0	-
LOC_Os03g29990	0	-
LOC_Os03g30270	0	-
LOC_Os01g21320	83.3333	9.53594
LOC_Os02g42730	8.81333	1.61199
LOC_Os12g39770	0.716667	-
LOC_Os06g07430	0	-
LOC_Os06g03740	1.97667	0
LOC_Os03g29980	3.86	2.19203
LOC_Os01g20900	9.40333	0.996279
LOC_Os06g36780	0	-
LOC_Os04g47270	4.45333	0.8254
LOC_Os10g07210	5.27333	0
LOC_Os09g23725	0	0
LOC_Os09g08224	0	-
LOC_Os08g26875	0.0166667	0
LOC_Os05g01300	13.21	6.00478
LOC_Os01g14160	0	-
LOC_Os06g12710	0.01	-
LOC_Os03g02440	5.89333	0.191814

## Sheet: Ind.
Supplementary Table S3: Expression analysis of candidate genes in indica.
Gene ID	GSE98924 for7-8day seeds (FPKM)	GSE13233for 10-14day seeds (RPKM)
LOC_Os06g04040	4.72667	1.78257
LOC_Os06g04169	56.44	0.0826869
LOC_Os06g04190	4.29667	0.376141
LOC_Os06g04200	0.403333	1169.8
LOC_Os06g04220	2.35333	0
LOC_Os06g04230	30.3033	1.99346
LOC_Os06g04240	7.13	2.96555
LOC_Os06g04300	17.99	9.84658
LOC_Os06g04310	0.0966667	-
LOC_Os06g04030	460.567	231.745
LOC_Os06g04060	0	-
LOC_Os06g03970	6.28	0.603842
LOC_Os06g04280	51.65	4.29833
LOC_Os06g04150	11.0667	0
LOC_Os06g04020	433.143	29.0436
LOC_Os06g03980	0.926667	4.75614
LOC_Os06g04130	25	3.27614
LOC_Os06g04010	11.1967	2.5362
LOC_Os06g03990	20.4533	4.61541
LOC_Os06g04120	0.146667	-
LOC_Os06g04080	0.433333	0.0552263
LOC_Os06g04195	0.236667	5.16248
LOC_Os06g04090	10.7167	0
LOC_Os04g47190	20.2033	17.6717
LOC_Os04g47410	53.0067	2.94032
LOC_Os04g47120	49.46	0.816626
LOC_Os06g04000	20.1967	4.28961
LOC_Os04g47350	0	-
LOC_Os06g12460	8.36	0.117776
LOC_Os06g12030	2.84	0.518288
LOC_Os11g05900	0	-
LOC_Os06g12260	20.1233	7.0984
LOC_Os04g47380	5.80333	0.413374
LOC_Os04g47400	6.34333	7.50376
LOC_Os04g47140	7.58333	0.23686
LOC_Os04g47360	0.706667	0.772859
LOC_Os06g12450	0.0566667	80.9651
LOC_Os04g47370	18.0867	21.9682
LOC_Os04g47220	232.85	2.47063
LOC_Os04g47150	0.823333	-
LOC_Os04g47130	4.31667	1.17951
LOC_Os06g04070	35.74	2.65337
LOC_Os04g47270	4.45333	0.8254
LOC_Os04g47390	0.02	-
LOC_Os04g47330	0.123333	0.0692057
LOC_Os04g47260	17.5833	5.10523
LOC_Os04g47250	48.9133	0.461146
LOC_Os04g47200	36.0067	-
LOC_Os04g47310	134.327	4.26199
LOC_Os04g47290	5.14667	0.230251
LOC_Os04g47280	4.34333	2.51046
LOC_Os04g47240	16.3767	2.14985
LOC_Os04g47320	1.69667	0
LOC_Os07g09460	15.82	0.122341
LOC_Os04g47555	1.96	0.47513
LOC_Os04g47420	0.72	0
LOC_Os04g47170	1.07	0.306092
LOC_Os04g47450	0.116667	-
LOC_Os08g17390	14.6067	0
LOC_Os04g47550	4.30333	0.448508
LOC_Os04g47530	16.5167	2.11957
LOC_Os04g47500	0.0366667	0.090131
LOC_Os04g47510	0.0966667	-
LOC_Os04g47180	16.1733	10.0867
LOC_Os07g26690	181.827	355.968
LOC_Os07g28860	0.05	-
LOC_Os06g11230	0	-
LOC_Os06g04330	11.8867	2.96865
LOC_Os04g47520	49.6667	0.273111
LOC_Os03g30450	0	0
LOC_Os04g47480	1.79	0.0951163
LOC_Os04g36062	6.56667	0.322138
LOC_Os07g40140	0.353333	0.199388
LOC_Os04g47490	0	-
LOC_Os06g11550	0	-
LOC_Os09g19954	0.196667	6.8909
LOC_Os04g47160	0	-
LOC_Os06g09370	49.88	29.3318
LOC_Os10g22484	5.87	0.331401
LOC_Os04g47470	0.253333	-
LOC_Os01g09500	6.29	1.2397
LOC_Os06g04510	7.23667	0
LOC_Os03g30110	0	0
LOC_Os07g27170	0	-
LOC_Os06g12620	0.603333	0.452232
LOC_Os03g44930	0	-
LOC_Os06g11050	0.01	0
LOC_Os10g20280	0.01	0.214982
LOC_Os09g36540	0.0266667	0
LOC_Os06g04490	0.11	-
LOC_Os09g37260	2.45333	0
LOC_Os06g04270	112.97	0.902635
LOC_Os06g12560	1.79333	0
LOC_Os06g04500	17.9133	2.73034
LOC_Os04g47460	0	-
LOC_Os06g04350	20.7467	15.9508
LOC_Os06g04250	14.0633	1.40463
LOC_Os02g39900	0.0733333	0
LOC_Os01g57854	9.61	-
LOC_Os03g22300	0	0.0373845
LOC_Os09g23595	2.26333	0.162896
LOC_Os09g37310	0.316667	0.0569722
LOC_Os08g15220	0	0.0371554
LOC_Os06g12590	8.76	0.233758
LOC_Os03g30360	0	-
LOC_Os05g12310	0	-
LOC_Os03g30010	0	-
LOC_Os06g12920	0	-
LOC_Os03g11140	4.21667	0.319431
LOC_Os04g36054	7.52333	0.511986
LOC_Os06g12950	3.73	0.43789
LOC_Os06g11260	0.0133333	-
LOC_Os04g52479	23.6967	2.10081
LOC_Os06g08720	51.3533	0.0517657
LOC_Os06g04380	13.5933	1.49056
LOC_Os06g04140	4.12	0.153211
LOC_Os06g12690	114.28	31.3998
LOC_Os09g23725	0	0
LOC_Os06g12930	1.87667	0
LOC_Os06g12160	10.0867	2.43892
LOC_Os06g11270	0.01	0.885696
LOC_Os06g12649	11.0667	0.366501
LOC_Os09g09770	0	-
LOC_Os06g04370	1.11333	0.225012
LOC_Os04g01040	0	-
LOC_Os06g04410	0.293333	0
LOC_Os03g30020	0	-
LOC_Os06g04440	0	-
LOC_Os06g04470	20.57	4.61289
LOC_Os08g15090	3.06	0.0543514
LOC_Os06g12860	0	-
LOC_Os06g04390	27.3167	2.88491
LOC_Os06g04360	3.12	0.504572
LOC_Os06g04420	0	-
LOC_Os06g12870	10.2333	0.194413
LOC_Os06g11300	0.0733333	0.380602
LOC_Os03g30092	13.06	0
LOC_Os08g15080	35.3667	6.97504
LOC_Os06g11740	43.4933	0.645017
LOC_Os03g30040	0	-
LOC_Os06g12876	3.39333	3.64821
LOC_Os09g36920	20.48	5.86917
LOC_Os06g04399	84.1367	10.9216
LOC_Os03g30060	0.566667	0
LOC_Os06g12790	8.79	0.358666
LOC_Os09g23540	4.92333	-
LOC_Os06g04480	16.7567	0.119305
LOC_Os06g11200	0.49	-
LOC_Os02g36264	0.113333	0
LOC_Os06g12800	0.376667	-
LOC_Os11g39079	0	-
LOC_Os06g11160	0.696667	-
LOC_Os06g11330	1.67333	1.04138
LOC_Os06g12710	0.01	-
LOC_Os01g09690	0	-
LOC_Os05g01560	62.2767	3.26615
LOC_Os06g11130	12.03	1.09272
LOC_Os06g11240	7.1	0
LOC_Os06g12810	1.37333	0
LOC_Os06g12882	22.9167	6.41472
LOC_Os05g01310	13.67	3.58375
LOC_Os06g12610	0.213333	0.0803761
LOC_Os06g12820	12.0267	0.0337346
LOC_Os07g28840	16.58	1.23682
LOC_Os06g04450	5.16	0.368305
LOC_Os06g11308	0	-
LOC_Os03g30150	1.11667	-
LOC_Os06g11100	0	-
LOC_Os08g15430	0	-
LOC_Os09g23690	11.56	3.27235
LOC_Os06g12680	8.35667	0.738273
LOC_Os03g07140	0.236667	0
LOC_Os10g22510	2.3	0.144901
LOC_Os05g01350	9.42333	1.21834
LOC_Os01g19160	4.64	0.258855
LOC_Os06g04210	9.81667	0.679601
LOC_Os06g04290	79.4067	47.5745
LOC_Os06g12310	39.48	-
LOC_Os06g12290	0.0266667	-
LOC_Os01g09530	0.01	-
LOC_Os04g47210	0.05	-
LOC_Os06g12330	0	0
LOC_Os08g17620	0	-
LOC_Os06g12380	0.456667	0
LOC_Os04g47300	2.28667	17.3843
LOC_Os04g47110	0.153333	0.138929
LOC_Os04g47430	0	0.0391307
LOC_Os07g09990	0.0366667	-
LOC_Os05g01300	13.21	6.00478
LOC_Os06g11220	0	-
LOC_Os01g19320	3.11667	0
LOC_Os04g36070	2.70667	0.1196
LOC_Os07g40130	64.06	28.3845
LOC_Os01g19270	5.87667	4.20956
LOC_Os07g03680	0	-
LOC_Os04g49680	41.8367	64.3142
LOC_Os01g09520	0	-
LOC_Os08g16870	0	-
LOC_Os01g09510	78.6467	973.022
LOC_Os07g09910	0	-
LOC_Os06g11190	8.74	0.678652
LOC_Os11g05920	0	0.0211499
LOC_Os06g12750	0	-
LOC_Os08g15230	16.77	5.71819
LOC_Os06g12850	0	0.0884043
LOC_Os09g37270	16.4333	2.37206
LOC_Os06g11350	0	-
LOC_Os06g12840	0	-
LOC_Os06g30260	0	0
LOC_Os06g11690	0	-
LOC_Os09g23710	0	-
LOC_Os03g30030	0.0133333	0
LOC_Os06g12660	50.95	0.29311
LOC_Os06g12630	16.3267	0.870031
LOC_Os06g12830	0.15	0
LOC_Os06g11610	2.83333	1.06875
LOC_Os03g30000	8.11333	1.12798
LOC_Os06g12580	134.63	13.843
LOC_Os07g01410	0.0233333	-
LOC_Os06g11800	33.6533	2.80086
LOC_Os06g12890	0.153333	-
LOC_Os06g04460	24.63	4.39461
LOC_Os06g09280	6.14667	0.968663
LOC_Os06g11210	1.60667	-
LOC_Os07g26550	2.34	0.111178
LOC_Os06g11150	3.71	0
LOC_Os06g11320	9.29667	2.37038
LOC_Os03g58940	31.2667	0.0512033
LOC_Os06g04670	0.03	-
LOC_Os06g12550	0	-
LOC_Os06g11140	10.7333	0.792183
LOC_Os07g10460	23.36	1.65231
LOC_Os06g12910	0.05	-
LOC_Os02g13890	5.5	0.39517
LOC_Os03g30220	0.103333	-
LOC_Os07g09950	8.2	0
LOC_Os06g12760	0	-
LOC_Os06g04430	0	-
LOC_Os06g09560	2.66333	4.19016
LOC_Os03g30050	0.313333	0
LOC_Os06g12720	0.04	0
LOC_Os08g15204	20.7933	2.6616
LOC_Os06g12960	5.47667	2.31496
LOC_Os05g01330	6.48333	0
LOC_Os06g12970	0	-
LOC_Os04g15510	0	-
LOC_Os07g27680	0	-
LOC_Os11g39090	0.223333	-
LOC_Os06g12600	19.9867	0.152824
LOC_Os03g09950	0	-
LOC_Os02g13740	0	-
LOC_Os07g01390	0	-
LOC_Os04g46780	0.753333	0
LOC_Os06g11750	0.206667	-
LOC_Os02g13710	1.83667	0.0528301
LOC_Os06g11304	0	0.0402708
LOC_Os01g53255	0	-
LOC_Os06g03960	2.81	-
LOC_Os03g10870	2.86333	9.56515
LOC_Os06g04340	6.31333	0.907339
LOC_Os01g19140	13.0033	0
LOC_Os03g63040	9.13333	19.5566

## Sheet: Jap.
Supplementary Table S3: Expression analysis of candidate genes in japonica.
Gene ID	GSE98924 for7-8day seeds (FPKM)	GSE13233for 10-14day seeds (RPKM)
LOC_Os06g04169	56.44	0.0826869
LOC_Os06g04190	4.29667	0.376141
LOC_Os06g04195	0.236667	5.16248
LOC_Os06g04200	0.403333	1169.8
LOC_Os06g04660	23.5467	8.69858
LOC_Os06g05359	2.55	0.201795
LOC_Os06g06960	0.513333	0.115916
LOC_Os06g05750	2.44	0.580665
LOC_Os06g12450	0.0566667	80.9651
LOC_Os06g05390	42.4467	1.38715
LOC_Os06g06980	151.183	3.26021
LOC_Os06g03990	20.4533	4.61541
LOC_Os06g04010	11.1967	2.5362
LOC_Os06g03970	6.28	0.603842
LOC_Os08g34600	0	-
LOC_Os06g06950	0.00666667	-
LOC_Os06g09010	0.0766667	-
LOC_Os01g72160	0.313333	-
LOC_Os06g03980	0.926667	4.75614
LOC_Os06g04020	433.143	29.0436
LOC_Os06g06940	3.61333	0.285348
LOC_Os06g04040	4.72667	1.78257
LOC_Os06g04450	5.16	0.368305
LOC_Os06g04440	0	-
LOC_Os06g04510	7.23667	0
LOC_Os06g02630	0.336667	0.223916
LOC_Os06g04830	7.46667	0.562065
LOC_Os06g04500	17.9133	2.73034
LOC_Os02g41696	0	-
LOC_Os06g05190	3.94667	1.6988
LOC_Os06g09000	0.0466667	-
LOC_Os06g08850	17.5767	1.97002
LOC_Os06g04410	0.293333	0
LOC_Os06g08860	6.45333	0.137047
LOC_Os06g04030	460.567	231.745
LOC_Os06g03580	13.5633	0.318673
LOC_Os01g24294	0.0266667	-
LOC_Os09g09700	0	-
LOC_Os06g08900	0.0266667	-
LOC_Os06g08970	0	-
LOC_Os06g07020	3.70667	0.514869
LOC_Os05g43830	11.9867	7.32131
LOC_Os06g08990	5.79667	11.3241
LOC_Os07g30430	0	-
LOC_Os06g04520	5.87667	0.188876
LOC_Os06g06890	0.116667	-
LOC_Os01g14200	0	0
LOC_Os06g04240	7.13	2.96555
LOC_Os06g12590	8.76	0.233758
LOC_Os06g06780	41.4033	7.43845
LOC_Os06g03710	0.14	0.435374
LOC_Os06g04490	0.11	-
LOC_Os06g04470	20.57	4.61289
LOC_Os02g41702	0	-
LOC_Os04g39280	3.36667	0.236025
LOC_Os04g33140	0.0766667	0.187072
LOC_Os06g06850	0.463333	0
LOC_Os06g04640	11.6133	6.17217
LOC_Os04g33120	0	0.0353741
LOC_Os06g09470	0	0
LOC_Os04g09360	0.00333333	-
LOC_Os06g06920	2.82667	0.101186
LOC_Os01g39730	0	-
LOC_Os11g34110	6.14667	-
LOC_Os02g41690	0	-
LOC_Os06g03700	53.41	0.202086
LOC_Os06g06930	1.67333	0.0514325
LOC_Os06g03690	24.6067	11.2563
LOC_Os01g41100	0	-
LOC_Os03g07670	0	-
LOC_Os06g04060	0	-
LOC_Os06g08520	0	-
LOC_Os06g06900	16.09	15.0182
LOC_Os01g14250	0	-
LOC_Os08g34590	0	0
LOC_Os10g25120	0	-
LOC_Os06g07040	1.15	0.0608717
LOC_Os01g05140	42.7	5.1471
LOC_Os06g04600	9.88333	3.32313
LOC_Os11g36719	0.00333333	0.0239226
LOC_Os01g15910	0.346667	0
LOC_Os06g04480	16.7567	0.119305
LOC_Os06g09500	0	-
LOC_Os01g21720	0	-
LOC_Os06g08960	0	-
LOC_Os07g16460	0	-
LOC_Os06g07000	10.84	23.2887
LOC_Os01g27570	0	-
LOC_Os08g23260	0	-
LOC_Os06g04130	25	3.27614
LOC_Os06g04150	11.0667	0
LOC_Os06g04220	2.35333	0
LOC_Os06g04840	1.29667	0.142369
LOC_Os06g05010	2.09333	20.4127
LOC_Os09g17890	0	-
LOC_Os06g05740	12.5767	31.0544
LOC_Os06g04300	17.99	9.84658
LOC_Os06g03600	38.2667	14.066
LOC_Os06g04000	20.1967	4.28961
LOC_Os06g09020	37.9567	5.61017
LOC_Os06g06970	2.18	0.191222
LOC_Os06g02920	0	-
LOC_Os06g04270	112.97	0.902635
LOC_Os06g03650	0	-
LOC_Os06g06990	11.9833	0.123408
LOC_Os01g13990	0	-
LOC_Os07g07850	0	-
LOC_Os06g04820	17.3267	6.64579
LOC_Os06g09490	0	0
LOC_Os06g04800	19.6933	1.91017
LOC_Os06g07120	11.3133	0.899
LOC_Os06g04430	0	-
LOC_Os01g15960	0	-
LOC_Os09g10310	0.0166667	-
LOC_Os06g07130	21.09	2.17628
LOC_Os02g41680	5.52	0.045492
LOC_Os06g08980	0	-
LOC_Os06g37520	0	0
LOC_Os08g08150	0	-
LOC_Os07g23830	0.00333333	-
LOC_Os06g06790	9.80667	2.8
LOC_Os01g50350	0	-
LOC_Os05g32470	0	-
LOC_Os06g04420	0	-
LOC_Os06g04360	3.12	0.504572
LOC_Os06g06840	0	-
LOC_Os01g17214	4.47	0
LOC_Os01g24100	0.293333	-
LOC_Os06g03682	20.03	2.68438
LOC_Os06g12580	134.63	13.843
LOC_Os03g01710	21.33	30.0532
LOC_Os01g15900	1.67667	1.75209
LOC_Os06g03740	1.97667	0
LOC_Os08g03420	1.67	4.77961
LOC_Os06g03670	0.903333	0
LOC_Os03g07660	0.126667	0
LOC_Os06g08910	12.48	0.414865
LOC_Os04g33030	66.9667	6.19193
LOC_Os01g24090	8.15333	0.196054
LOC_Os06g04580	15.7533	2.66236
LOC_Os06g06910	5.67333	0.555155
LOC_Os02g03930	1.96667	0.177979
LOC_Os06g08810	0.146667	-
LOC_Os06g03520	44.32	3.28179
LOC_Os01g14010	0.14	0
LOC_Os06g03080	0.00666667	-
LOC_Os05g05100	0.53	0
LOC_Os01g21750	0.103333	-
LOC_Os06g10090	0	-
LOC_Os06g06560	57.8133	96.4438
LOC_Os03g52640	16.1333	0.224991
LOC_Os06g08110	22.09	1.35034
LOC_Os06g09510	0	-
LOC_Os06g07010	7.11667	1.13845
LOC_Os08g34690	0	0
LOC_Os01g21710	0	-
