# Supplementary material for: Genome Wide Association Study on Development and Evolution of Glutinous Rice
Source: Research Square preprint supplement (doi:10.21203/rs.3.rs-649622/v1), 2021-07-06
Supplement: Supplementary file 7 [file ee44b2534d94ecdffbcbbbec.xlsx]

## Sheet: Sheet4
Supplementary Table S5: SNPs used for haplotype analysis in three key genes
Gene	SNP ID	-log(P)	Promoter or UTR	Non-synonymous SNPs or Splice site
SSG6	Chr6_1627720	4.44491	√
	Chr6_1627847	4.21824	√
	Chr6_1627881	3.97062	√
	Chr6_1628167	12.9431	√
	Chr6_1628211	4.6216	√
	Chr6_1628422	13.6556	√
	Chr6_1628937	12.5901	√
	Chr6_1629252	3.06399	√
	Chr6_1629361	3.32606	√
	Chr6_1629391	11.1898	√
	Chr6_1629494	2.79317	√
	Chr6_1629652	10	√
	Chr6_1629828	6.84771	√
	Chr6_1629904	10		Non-sys
	Chr6_1630301	15.6536		Non-sys
	Chr6_1633040	10		Non-sys
	Chr6_1633260	12.4815	√
Wx	Chr6_1763647	3.28067	√
	Chr6_1763716	2.09259	√
	Chr6_1763739	2.14327	√
	Chr6_1763992	8.04528	√
	Chr6_1763994	8.56067	√
	Chr6_1763995	8.11126	√
	Chr6_1764004	9.97881	√
	Chr6_1764008	9.21896	√
	Chr6_1764019	9.82102	√
	Chr6_1764038	10.1296	√
	Chr6_1764042	9.10679	√
	Chr6_1764068	11.2741	√
	Chr6_1764149	4.36452	√
	Chr6_1764178	2.04048	√
	Chr6_1764191	5.20691	√
	Chr6_1764224	11.2798	√
	Chr6_1764225	12.4868	√
	Chr6_1764235	10.9208	√
	Chr6_1764499	4.95861	√
	Chr6_1764516	11.8827	√
	Chr6_1764553	11.3363	√
	Chr6_1764564	4.88606	√
	Chr6_1764641	11.9747	√
	Chr6_1764700	11.0595	√
	Chr6_1765415	14.3635	√
	Chr6_1765448	15.4776	√
	Chr6_1765761	10		Splice site
	Chr6_1765976	4.77469	√
	Chr6_1766003	2.91009	√
	Chr6_1766020	15.1765	√
	Chr6_1766071	11.1884	√
	Chr6_1766074	12.4672	√
	Chr6_1766108	13.7959	√
	Chr6_1766110	14.3635	√
	Chr6_1766460	14.1694	√
	Chr6_1768006	11.4763		Non-sys
	Chr6_1768998	2.68613		Non-sys
OsSSIIa	Chr6_6747298	10	√
	Chr6_6747510	2.71444	√
	Chr6_6747612	2.16749	√
	Chr6_6747727	2.00612	√
	Chr6_6747948	2.21681	√
	Chr6_6748443	2.11862	√
	Chr6_6752357	2.2426		Non-sys
	Chr6_6752888	10		Non-sys
	Chr6_6753241	2.25885	√
	Chr6_6753257	2.32606	√
